# Supplementary material for: SILAC-Based Characterization of Plasma-Derived Extracellular Vesicles in Patients Undergoing Partial Hepatectomy
Source: Preprints.org preprint supplement (doi:10.20944/preprints202408.2181.v1), 2024-08-30
Supplement: Supplementary file 1 [file supplementary]

## Sheet: Description
Supplementary Data 1-Overall description of the dataset
sheet name	Description
sheet 01_LFQ-L	LFQ-Light (LFQ-L) lg2 Intensity of individual samples with group summary statistics (outcome, time and combined)
sheet 02_SILAC	Proteins with SILAC ratios (normalized ratios L/H and lg2 transformed)
sheet 03_LFQ-H (SILAC) variance	Robustness of SILAC proteome standard: LFQ-H of 153 proteins with higher than 5% coefficient of variation (CV) across all samples
sheet 04_Venn LFQ-L_SILAC	Venn comparing LFQ-L and SILAC identifications
sheet 05_Enrichment	Enrichments (Metascape Top GO and celltype)
sheet 06	GOCC-categorization tables
sheet 07a-j	Summary statistics on GOCC categories
sheet 08	Individual sample and groups-summary statistics on proteins annotated to Vesiclepedia

## Sheet: 01_LFQ-L
Protein ID	Protein names	Gene name	Mean (lg2) PHLF.PRE	Median (lg2) PHLF.PRE	sd PHLF.PRE	CV(%) PHLF.PRE	Valid values PHLF.PRE	Mean (lg2) PHLF.POD1	Median (lg2) PHLF.POD1	sd PHLF.POD1	CV(%) PHLF.POD1	Valid values PHLF.POD1	Mean (lg2) PHLF.POD5	Median (lg2) PHLF.POD5	sd PHLF.POD5	CV(%) PHLF.POD5	Valid values PHLF.POD5	Mean (lg2) noPHLF.PRE	Median (lg2) noPHLF.PRE	sd noPHLF.PRE	CV(%) noPHLF.PRE	Valid values noPHLF.PRE	Mean (lg2) noPHLF.POD1	Median (lg2) noPHLF.POD1	sd noPHLF.POD1	CV(%) noPHLF.POD1	Valid values noPHLF.POD1	Mean (lg2) noPHLF.POD5	Median (lg2) noPHLF.POD5	sd noPHLF.POD5	CV(%) noPHLF.POD5	Valid values noPHLF.POD5	Mean (lg2) ALPPS.PRE	Median (lg2) ALPPS.PRE	sd ALPPS.PRE	CV(%) ALPPS.PRE	Valid values ALPPS.PRE	Mean (lg2) ALPPS.POD1	Median (lg2) ALPPS.POD1	sd ALPPS.POD1	CV(%) ALPPS.POD1	Valid values ALPPS.POD1	Mean (lg2) ALPPS.POD5	Median (lg2) ALPPS.POD5	sd ALPPS.POD5	CV(%) ALPPS.POD5	Valid values ALPPS.POD5	lg2LFQ.PHLF.P1_PRE	lg2LFQ.PHLF.P1_POD1
A0AVT1	Ubiquitin-like modifier-activating enzyme 6	UBA6	NaN	NaN	NaN	NaN	0	27.5492	27.5492	NaN	NaN	1	26.9705	26.9705	NaN	NaN	1	NaN	NaN	NaN	NaN	0	26.792	26.792	0.29127	0.0108715	2	27.527	27.527	0.0137149	0.000498236	2	26.9285	26.9285	NaN	NaN	1	27.0622	27.0622	NaN	NaN	1	NaN	NaN	NaN	NaN	0	NaN	NaN
A0MZ66	Shootin-1	KIAA1598	NaN	NaN	NaN	NaN	0	NaN	NaN	NaN	NaN	0	26.3622	26.3622	NaN	NaN	1	NaN	NaN	NaN	NaN	0	26.5232	26.5232	NaN	NaN	1	26.7236	26.7236	NaN	NaN	1	26.2722	26.2722	NaN	NaN	1	NaN	NaN	NaN	NaN	0	25.8934	25.8934	NaN	NaN	1	NaN	NaN
A3KMH1	von Willebrand factor A domain-containing protein 8	VWA8	24.0141	24.0141	NaN	NaN	1	NaN	NaN	NaN	NaN	0	NaN	NaN	NaN	NaN	0	NaN	NaN	NaN	NaN	0	NaN	NaN	NaN	NaN	0	NaN	NaN	NaN	NaN	0	NaN	NaN	NaN	NaN	0	NaN	NaN	NaN	NaN	0	NaN	NaN	NaN	NaN	0	NaN	NaN
A4D1E9	GTP-binding protein 10	GTPBP10	NaN	NaN	NaN	NaN	0	24.4111	24.4111	NaN	NaN	1	24.237	24.237	NaN	NaN	1	NaN	NaN	NaN	NaN	0	25.2114	25.2114	NaN	NaN	1	NaN	NaN	NaN	NaN	0	NaN	NaN	NaN	NaN	0	NaN	NaN	NaN	NaN	0	NaN	NaN	NaN	NaN	0	NaN	NaN
A5YKK6	CCR4-NOT transcription complex subunit 1	CNOT1	25.9722	25.9722	0.582824	0.0224403	2	NaN	NaN	NaN	NaN	0	26.658	26.658	NaN	NaN	1	NaN	NaN	NaN	NaN	0	NaN	NaN	NaN	NaN	0	NaN	NaN	NaN	NaN	0	NaN	NaN	NaN	NaN	0	NaN	NaN	NaN	NaN	0	NaN	NaN	NaN	NaN	0	26.3843	NaN
A6NCE7	Microtubule-associated proteins 1A/1B light chain 3 beta 2;Microtubule-associated proteins 1A/1B light chain 3B	MAP1LC3B2	NaN	NaN	NaN	NaN	0	24.5431	24.5431	NaN	NaN	1	NaN	NaN	NaN	NaN	0	27.4263	27.4263	NaN	NaN	1	27.0503	27.0503	NaN	NaN	1	NaN	NaN	NaN	NaN	0	27.3577	27.3577	0.0450182	0.00164554	2	27.1676	27.1676	0.379736	0.0139775	2	27.5499	27.5499	NaN	NaN	1	NaN	NaN
A6NDG6	Phosphoglycolate phosphatase	PGP	26.6348	26.6348	NaN	NaN	1	NaN	NaN	NaN	NaN	0	NaN	NaN	NaN	NaN	0	25.9034	25.9034	NaN	NaN	1	26.6389	26.6389	NaN	NaN	1	NaN	NaN	NaN	NaN	0	NaN	NaN	NaN	NaN	0	NaN	NaN	NaN	NaN	0	NaN	NaN	NaN	NaN	0	26.6348	NaN
A6NHL2	Tubulin alpha chain-like 3	TUBAL3	29.678	29.5877	0.549678	0.0185214	3	30.4156	30.4156	0.58992	0.0193953	2	29.6661	29.8018	0.302135	0.0101845	3	30.7135	30.7361	0.0822529	0.00267807	3	30.1542	29.4686	1.21218	0.0401993	3	30.2271	30.4878	1.17721	0.0389456	3	30.2066	30.3925	0.480735	0.0159149	3	29.7219	30.3	1.37407	0.0462309	3	30.1081	30.1588	0.13239	0.00439714	3	29.5877	29.9985
A6NHR9	Structural maintenance of chromosomes flexible hinge domain-containing protein 1	SMCHD1	NaN	NaN	NaN	NaN	0	NaN	NaN	NaN	NaN	0	24.8774	24.8774	NaN	NaN	1	26.899	26.899	NaN	NaN	1	29.869	29.869	NaN	NaN	1	NaN	NaN	NaN	NaN	0	NaN	NaN	NaN	NaN	0	NaN	NaN	NaN	NaN	0	NaN	NaN	NaN	NaN	0	NaN	NaN
A6NKT7	RanBP2-like and GRIP domain-containing protein 3;RanBP2-like and GRIP domain-containing protein 4	RGPD3	26.7856	26.7856	0.665869	0.0248592	2	26.7955	26.6974	0.422107	0.0157529	3	26.9715	26.9715	NaN	NaN	1	NaN	NaN	NaN	NaN	0	26.6732	26.6732	NaN	NaN	1	NaN	NaN	NaN	NaN	0	NaN	NaN	NaN	NaN	0	27.1408	27.1408	NaN	NaN	1	26.9457	26.9457	NaN	NaN	1	27.2565	26.6974
A8MXV4	Nucleoside diphosphate-linked moiety X motif 19, mitochondrial	NUDT19	NaN	NaN	NaN	NaN	0	NaN	NaN	NaN	NaN	0	NaN	NaN	NaN	NaN	0	NaN	NaN	NaN	NaN	0	24.908	24.908	NaN	NaN	1	NaN	NaN	NaN	NaN	0	NaN	NaN	NaN	NaN	0	NaN	NaN	NaN	NaN	0	NaN	NaN	NaN	NaN	0	NaN	NaN
E9PAV3	Nascent polypeptide-associated complex subunit alpha, muscle-specific form;Nascent polypeptide-associated complex subunit alpha	NACA	29.9223	30.1746	0.641134	0.0214266	3	29.2822	30.328	2.0137	0.0687686	3	30.3584	30.3351	0.108717	0.00358112	3	29.6783	29.8257	0.274202	0.00923914	3	29.7773	29.9839	0.59073	0.0198383	3	28.7095	29.0171	1.07997	0.0376172	3	29.9895	29.9221	0.328811	0.0109642	3	29.8361	29.8417	0.0120598	0.000404202	3	29.5034	29.3887	0.334073	0.0113232	3	30.1746	30.328
L0R8F8	Mitochondrial ribosome and complex I assembly factor AltMIEF1	MIEF1	NaN	NaN	NaN	NaN	0	NaN	NaN	NaN	NaN	0	NaN	NaN	NaN	NaN	0	25.7811	25.7811	NaN	NaN	1	NaN	NaN	NaN	NaN	0	NaN	NaN	NaN	NaN	0	NaN	NaN	NaN	NaN	0	NaN	NaN	NaN	NaN	0	27.6505	27.6505	NaN	NaN	1	NaN	NaN
O00116	Alkyldihydroxyacetonephosphate synthase, peroxisomal	AGPS	25.8	25.8	NaN	NaN	1	NaN	NaN	NaN	NaN	0	NaN	NaN	NaN	NaN	0	NaN	NaN	NaN	NaN	0	NaN	NaN	NaN	NaN	0	NaN	NaN	NaN	NaN	0	NaN	NaN	NaN	NaN	0	NaN	NaN	NaN	NaN	0	NaN	NaN	NaN	NaN	0	NaN	NaN
O00139	Kinesin-like protein KIF2A	KIF2A	NaN	NaN	NaN	NaN	0	NaN	NaN	NaN	NaN	0	NaN	NaN	NaN	NaN	0	NaN	NaN	NaN	NaN	0	NaN	NaN	NaN	NaN	0	NaN	NaN	NaN	NaN	0	NaN	NaN	NaN	NaN	0	25.7766	25.7766	1.01544	0.0393939	2	NaN	NaN	NaN	NaN	0	NaN	NaN
O00148	ATP-dependent RNA helicase DDX39A	DDX39A	29.7005	29.6796	0.419367	0.0141199	3	29.7098	29.755	0.28915	0.00973248	3	29.7495	29.7609	0.127455	0.00428427	3	29.8724	29.8134	0.201054	0.00673042	3	29.6137	29.7491	0.245141	0.00827796	3	29.7376	29.8044	0.311373	0.0104707	3	29.628	29.628	0.0558011	0.00188339	2	28.5607	29.8334	2.28919	0.0801514	3	29.0987	29.1746	0.490613	0.0168603	3	29.2919	29.9738
O00151	PDZ and LIM domain protein 1	PDLIM1	27.8295	27.6765	0.376945	0.0135448	3	28.0885	28.0885	0.780231	0.0277775	2	27.6769	27.7658	0.216135	0.0078092	3	27.7142	27.7142	NaN	NaN	1	27.7258	27.7258	NaN	NaN	1	26.4861	26.4861	NaN	NaN	1	NaN	NaN	NaN	NaN	0	NaN	NaN	NaN	NaN	0	NaN	NaN	NaN	NaN	0	27.6765	27.5368
O00154	Cytosolic acyl coenzyme A thioester hydrolase	ACOT7	26.6967	26.6967	NaN	NaN	1	26.8267	26.8267	NaN	NaN	1	27.1188	27.1188	0.0842546	0.00310687	2	NaN	NaN	NaN	NaN	0	27.0725	27.0725	0.449128	0.0165898	2	26.1143	26.1143	0.694376	0.0265899	2	26.4847	26.4847	NaN	NaN	1	27.18	27.18	NaN	NaN	1	26.5377	26.2314	0.606532	0.0228555	3	NaN	26.8267
O00159	Unconventional myosin-Ic	MYO1C	26.0907	26.2302	0.396396	0.015193	3	25.3362	25.3362	NaN	NaN	1	25.7699	25.6879	0.243977	0.00946753	3	27.09	27.09	NaN	NaN	1	26.2151	26.0197	0.48302	0.0184253	3	26.1965	26.1965	NaN	NaN	1	26.3122	27.1427	1.54842	0.0588481	3	26.2089	26.2089	NaN	NaN	1	25.1064	25.1064	NaN	NaN	1	25.6434	NaN
O00161	Synaptosomal-associated protein 23	SNAP23	NaN	NaN	NaN	NaN	0	NaN	NaN	NaN	NaN	0	26.5058	26.5058	NaN	NaN	1	NaN	NaN	NaN	NaN	0	NaN	NaN	NaN	NaN	0	NaN	NaN	NaN	NaN	0	NaN	NaN	NaN	NaN	0	NaN	NaN	NaN	NaN	0	NaN	NaN	NaN	NaN	0	NaN	NaN
O00170	AH receptor-interacting protein	AIP	27.6165	27.6165	NaN	NaN	1	27.0021	27.0021	0.139161	0.00515373	2	27.3236	27.3221	0.0801476	0.00293327	3	26.881	26.881	NaN	NaN	1	26.8118	26.8118	0.606345	0.0226149	2	26.7761	26.7761	NaN	NaN	1	28.2866	28.2866	NaN	NaN	1	NaN	NaN	NaN	NaN	0	27.8415	27.8415	NaN	NaN	1	NaN	26.9037
O00186	Syntaxin-binding protein 3	STXBP3	25.9605	25.9605	NaN	NaN	1	24.9374	24.9374	0.764888	0.0306723	2	24.9558	25.0124	0.60571	0.0242713	3	26.0031	26.0031	NaN	NaN	1	25.1075	25.1075	1.05258	0.041923	2	NaN	NaN	NaN	NaN	0	NaN	NaN	NaN	NaN	0	23.8806	23.8806	NaN	NaN	1	NaN	NaN	NaN	NaN	0	25.9605	25.4783
O00187	Mannan-binding lectin serine protease 2;Mannan-binding lectin serine protease 2 A chain;Mannan-binding lectin serine protease 2 B chain	MASP2	NaN	NaN	NaN	NaN	0	28.6057	28.5619	0.178685	0.00624648	3	28.0636	28.0636	NaN	NaN	1	28.6305	28.6305	NaN	NaN	1	NaN	NaN	NaN	NaN	0	29.4848	29.4848	NaN	NaN	1	29.7328	29.7328	0.4242	0.0142671	2	28.9223	28.9223	NaN	NaN	1	NaN	NaN	NaN	NaN	0	NaN	28.8022
O00203	AP-3 complex subunit beta-1	AP3B1	23.9476	23.9476	NaN	NaN	1	NaN	NaN	NaN	NaN	0	NaN	NaN	NaN	NaN	0	NaN	NaN	NaN	NaN	0	26.8214	26.8214	NaN	NaN	1	NaN	NaN	NaN	NaN	0	26.489	26.489	0.306101	0.0115558	2	26.2547	26.1445	0.344412	0.0131181	3	26.8684	26.8684	0.177222	0.00659593	2	23.9476	NaN
O00217	NADH dehydrogenase [ubiquinone] iron-sulfur protein 8, mitochondrial	NDUFS8	NaN	NaN	NaN	NaN	0	25.6598	25.6598	NaN	NaN	1	NaN	NaN	NaN	NaN	0	NaN	NaN	NaN	NaN	0	NaN	NaN	NaN	NaN	0	NaN	NaN	NaN	NaN	0	NaN	NaN	NaN	NaN	0	NaN	NaN	NaN	NaN	0	NaN	NaN	NaN	NaN	0	NaN	NaN
O00231	26S proteasome non-ATPase regulatory subunit 11	PSMD11	28.4371	28.3293	0.821985	0.0289054	3	28.889	28.6165	1.03738	0.0359094	3	28.7835	28.7031	0.677239	0.0235287	3	27.6891	27.6891	0.689841	0.0249138	2	28.0856	27.917	0.922651	0.0328514	3	28.1693	28.1896	0.264996	0.00940725	3	27.5715	27.5715	NaN	NaN	1	27.3522	27.3522	0.475412	0.0173811	2	27.5321	27.7106	0.974533	0.0353963	3	27.6743	28.6165
O00232	26S proteasome non-ATPase regulatory subunit 12	PSMD12	27.9273	27.8153	0.365606	0.0130913	3	27.3032	27.2847	0.299516	0.01097	3	27.6204	27.6204	0.367918	0.0133205	2	27.71	27.71	0.504161	0.0181942	2	27.1133	27.2827	0.314407	0.0115961	3	27.3233	27.282	0.104158	0.00381208	3	27.2661	27.2661	NaN	NaN	1	27.3872	27.3872	0.926732	0.0338381	2	27.6338	27.6338	NaN	NaN	1	27.6308	27.2847
O00244	Copper transport protein ATOX1	ATOX1	28.7137	28.7137	NaN	NaN	1	NaN	NaN	NaN	NaN	0	NaN	NaN	NaN	NaN	0	NaN	NaN	NaN	NaN	0	NaN	NaN	NaN	NaN	0	NaN	NaN	NaN	NaN	0	NaN	NaN	NaN	NaN	0	NaN	NaN	NaN	NaN	0	NaN	NaN	NaN	NaN	0	NaN	NaN
O00264	Membrane-associated progesterone receptor component 1	PGRMC1	27.5203	27.5203	0.652404	0.0237063	2	27.2849	27.2849	0.35603	0.0130486	2	26.9258	26.8957	0.222016	0.00824547	3	27.7048	27.7048	NaN	NaN	1	27.0161	27.0219	0.447217	0.0165537	3	27.5186	27.5186	0.656617	0.0238608	2	NaN	NaN	NaN	NaN	0	NaN	NaN	NaN	NaN	0	27.7296	27.7296	NaN	NaN	1	27.9816	27.0332
O00267	Transcription elongation factor SPT5	SUPT5H	NaN	NaN	NaN	NaN	0	26.2276	26.2276	NaN	NaN	1	26.2952	26.2952	NaN	NaN	1	NaN	NaN	NaN	NaN	0	26.505	26.505	0.224022	0.00845204	2	NaN	NaN	NaN	NaN	0	27.4007	27.4007	NaN	NaN	1	NaN	NaN	NaN	NaN	0	NaN	NaN	NaN	NaN	0	NaN	26.2276
O00273	DNA fragmentation factor subunit alpha	DFFA	26.8083	26.8083	NaN	NaN	1	27.055	27.055	NaN	NaN	1	27.1738	27.1738	0.0823179	0.00302931	2	29.1753	29.1753	NaN	NaN	1	27.2211	27.2211	0.0954272	0.00350563	2	26.7513	26.7513	0.219197	0.00819388	2	27.2892	27.2892	NaN	NaN	1	NaN	NaN	NaN	NaN	0	27.3368	27.3368	NaN	NaN	1	26.8083	27.055
O00292	Left-right determination factor 2	LEFTY2	NaN	NaN	NaN	NaN	0	NaN	NaN	NaN	NaN	0	NaN	NaN	NaN	NaN	0	30.1645	30.1645	NaN	NaN	1	30.0042	30.0042	NaN	NaN	1	NaN	NaN	NaN	NaN	0	NaN	NaN	NaN	NaN	0	NaN	NaN	NaN	NaN	0	NaN	NaN	NaN	NaN	0	NaN	NaN
O00299	Chloride intracellular channel protein 1	CLIC1	28.8249	28.9932	0.88404	0.0306693	3	29.2466	29.3039	0.20952	0.00716391	3	29.8973	30.0532	0.310544	0.010387	3	29.3189	29.3189	0.360727	0.0123036	2	28.8996	28.7982	0.389712	0.0134851	3	29.3308	29.3308	NaN	NaN	1	29.4745	29.4745	0.221081	0.00750076	2	29.087	29.0162	0.328843	0.0113055	3	29.4567	29.4561	0.0718262	0.00243837	3	27.8687	29.4215
O00303	Eukaryotic translation initiation factor 3 subunit F	EIF3F	29.7506	29.76	0.725997	0.0244028	3	29.9421	29.7045	0.69145	0.0230929	3	29.5592	29.5382	0.0642665	0.00217417	3	29.3108	29.8697	1.11094	0.0379022	3	29.4538	29.2501	1.03214	0.0350428	3	29.7912	29.7534	0.503166	0.0168898	3	28.6874	28.3172	1.07557	0.0374927	3	28.3727	28.2352	0.785973	0.0277017	3	27.889	27.7251	0.649295	0.0232814	3	30.4719	29.7045
O00330	Pyruvate dehydrogenase protein X component, mitochondrial	PDHX	NaN	NaN	NaN	NaN	0	26.3503	26.3503	1.0764	0.0408496	2	25.7586	25.615	0.269883	0.0104774	3	NaN	NaN	NaN	NaN	0	NaN	NaN	NaN	NaN	0	26.3628	26.3628	0.0356744	0.00135321	2	NaN	NaN	NaN	NaN	0	NaN	NaN	NaN	NaN	0	28.5581	28.5581	NaN	NaN	1	NaN	25.5891
O00408	cGMP-dependent 3,5-cyclic phosphodiesterase	PDE2A	29.6274	29.6274	NaN	NaN	1	27.5761	27.5761	0.0101449	0.000367888	2	NaN	NaN	NaN	NaN	0	NaN	NaN	NaN	NaN	0	27.8065	27.8065	NaN	NaN	1	28.2955	28.2955	NaN	NaN	1	NaN	NaN	NaN	NaN	0	NaN	NaN	NaN	NaN	0	28.4631	28.4631	NaN	NaN	1	29.6274	NaN
O00410	Importin-5	IPO5	30.8653	30.9338	0.720328	0.0233378	3	31.1214	30.8275	0.515823	0.0165745	3	31.3293	31.4748	0.262448	0.00837708	3	30.7554	30.8319	0.156811	0.00509864	3	30.7954	30.7498	0.124207	0.0040333	3	31.766	31.4712	1.57076	0.0494477	3	30.4433	30.2154	0.56149	0.0184438	3	29.8453	29.844	0.676815	0.0226775	3	29.8798	29.691	0.785878	0.0263013	3	30.9338	30.8275
O00411	DNA-directed RNA polymerase, mitochondrial	POLRMT	NaN	NaN	NaN	NaN	0	NaN	NaN	NaN	NaN	0	22.8056	22.8056	NaN	NaN	1	NaN	NaN	NaN	NaN	0	NaN	NaN	NaN	NaN	0	NaN	NaN	NaN	NaN	0	NaN	NaN	NaN	NaN	0	NaN	NaN	NaN	NaN	0	NaN	NaN	NaN	NaN	0	NaN	NaN
O00422	Histone deacetylase complex subunit SAP18	SAP18	27.1237	27.1237	NaN	NaN	1	27.4758	27.1327	0.648658	0.0236084	3	26.7085	26.7085	NaN	NaN	1	26.4621	26.4621	NaN	NaN	1	NaN	NaN	NaN	NaN	0	25.5693	25.5693	NaN	NaN	1	26.7612	26.7612	NaN	NaN	1	NaN	NaN	NaN	NaN	0	NaN	NaN	NaN	NaN	0	NaN	27.1327
O00425	Insulin-like growth factor 2 mRNA-binding protein 3	IGF2BP3	28.0914	28.0914	0.239537	0.00852705	2	28.3212	28.3921	0.193339	0.00682667	3	29.1689	29.1633	0.251331	0.0086164	3	27.3707	27.3707	0.370582	0.0135394	2	28.7381	28.5501	0.475323	0.0165398	3	28.556	28.5583	0.738508	0.0258618	3	27.7365	27.77	0.253079	0.0091244	3	27.9588	27.7962	0.498597	0.0178332	3	27.765	27.765	0.0567074	0.00204241	2	27.9221	28.3921
O00429	Dynamin-1-like protein	DNM1L	26.4763	26.4763	NaN	NaN	1	26.1472	26.1472	NaN	NaN	1	25.9693	25.9981	0.675415	0.0260082	3	26.0034	26.0034	0.297937	0.0114576	2	26.1649	26.1649	0.472182	0.0180464	2	26.7915	26.7915	0.512859	0.0191426	2	26.0926	26.0926	0.159503	0.00611293	2	26.0213	26.0213	NaN	NaN	1	26.4584	26.4584	NaN	NaN	1	26.4763	26.1472
O00442	RNA 3-terminal phosphate cyclase	RTCA	25.359	25.359	0.516064	0.0203503	2	26.2793	26.2793	NaN	NaN	1	25.1924	25.1924	NaN	NaN	1	25.6522	25.6522	0.360413	0.01405	2	25.6519	25.6519	0.045292	0.00176564	2	26.5029	26.5029	1.20006	0.0452802	2	NaN	NaN	NaN	NaN	0	NaN	NaN	NaN	NaN	0	NaN	NaN	NaN	NaN	0	NaN	NaN
O00471	Exocyst complex component 5	EXOC5	NaN	NaN	NaN	NaN	0	NaN	NaN	NaN	NaN	0	NaN	NaN	NaN	NaN	0	NaN	NaN	NaN	NaN	0	NaN	NaN	NaN	NaN	0	NaN	NaN	NaN	NaN	0	NaN	NaN	NaN	NaN	0	24.255	24.255	NaN	NaN	1	NaN	NaN	NaN	NaN	0	NaN	NaN
O00483	Cytochrome c oxidase subunit NDUFA4	NDUFA4	29.474	29.4571	0.195948	0.00664818	3	29.495	29.4759	0.268715	0.00911051	3	29.549	29.6059	0.114343	0.0038696	3	29.2332	29.575	0.633066	0.0216557	3	29.0853	29.2831	0.539158	0.0185371	3	28.806	28.806	1.02341	0.0355274	2	29.5139	29.5139	0.0309378	0.00104824	2	28.9529	28.9843	0.223045	0.00770373	3	29.5127	29.494	0.312205	0.0105787	3	29.6778	29.7728
O00487	26S proteasome non-ATPase regulatory subunit 14	PSMD14	27.658	27.5251	0.492011	0.0177891	3	27.3008	27.3468	0.241684	0.00885262	3	27.2572	27.1517	0.266599	0.00978085	3	26.6629	26.6629	NaN	NaN	1	27.485	27.5769	0.224726	0.0081763	3	27.1411	27.5033	0.902451	0.0332503	3	27.0359	27.0413	0.158414	0.00585939	3	NaN	NaN	NaN	NaN	0	27.623	27.623	0.239302	0.00866315	2	28.2028	27.5162
O00499	Myc box-dependent-interacting protein 1	BIN1	28.604	28.604	0.101823	0.00355974	2	NaN	NaN	NaN	NaN	0	28.8035	28.8035	NaN	NaN	1	NaN	NaN	NaN	NaN	0	NaN	NaN	NaN	NaN	0	27.3805	27.3805	NaN	NaN	1	NaN	NaN	NaN	NaN	0	NaN	NaN	NaN	NaN	0	NaN	NaN	NaN	NaN	0	28.532	NaN
O00505	Importin subunit alpha-4	KPNA3	27.0688	27.1613	0.526151	0.0194376	3	27.2501	27.1547	0.906879	0.0332798	3	26.521	26.3407	0.476188	0.0179551	3	NaN	NaN	NaN	NaN	0	26.6593	26.6593	0.392513	0.0147233	2	26.6131	26.4981	0.376137	0.0141335	3	26.8952	26.8952	NaN	NaN	1	26.7186	26.7186	0.46742	0.0174942	2	26.8288	26.8288	0.0409074	0.00152476	2	27.1613	26.3947
O00541	Pescadillo homolog	PES1	26.3787	26.3787	0.31899	0.0120927	2	26.678	26.678	NaN	NaN	1	26.7133	26.6802	0.19986	0.00748169	3	27.0031	27.0031	NaN	NaN	1	26.866	26.866	NaN	NaN	1	26.7329	26.7329	0.738591	0.0276286	2	NaN	NaN	NaN	NaN	0	NaN	NaN	NaN	NaN	0	NaN	NaN	NaN	NaN	0	26.1532	NaN
O00560	Syntenin-1	SDCBP	NaN	NaN	NaN	NaN	0	NaN	NaN	NaN	NaN	0	22.4394	22.4394	NaN	NaN	1	NaN	NaN	NaN	NaN	0	NaN	NaN	NaN	NaN	0	22.8803	22.8803	NaN	NaN	1	NaN	NaN	NaN	NaN	0	NaN	NaN	NaN	NaN	0	NaN	NaN	NaN	NaN	0	NaN	NaN
O00566	U3 small nucleolar ribonucleoprotein protein MPP10	MPHOSPH10	NaN	NaN	NaN	NaN	0	27.1637	27.1637	NaN	NaN	1	NaN	NaN	NaN	NaN	0	NaN	NaN	NaN	NaN	0	NaN	NaN	NaN	NaN	0	NaN	NaN	NaN	NaN	0	NaN	NaN	NaN	NaN	0	NaN	NaN	NaN	NaN	0	NaN	NaN	NaN	NaN	0	NaN	27.1637
O00567	Nucleolar protein 56	NOP56	26.7644	26.6334	0.349552	0.0130604	3	26.1975	26.1975	NaN	NaN	1	26.5238	26.426	0.196906	0.00742373	3	NaN	NaN	NaN	NaN	0	26.3162	26.3162	NaN	NaN	1	NaN	NaN	NaN	NaN	0	28.7203	28.7203	NaN	NaN	1	NaN	NaN	NaN	NaN	0	NaN	NaN	NaN	NaN	0	27.1605	26.1975
O00571	ATP-dependent RNA helicase DDX3X;ATP-dependent RNA helicase DDX3Y	DDX3X	27.7818	27.6324	0.328711	0.0118319	3	27.5756	27.3366	1.04321	0.0378309	3	27.7644	27.7848	0.473653	0.0170597	3	27.1082	27.3964	1.28678	0.0474682	3	26.5153	26.7069	1.30149	0.0490846	3	27.6996	27.4739	0.567513	0.0204882	3	27.9277	27.922	0.369389	0.0132266	3	27.5116	27.3532	0.792474	0.0288051	3	27.1467	27.464	0.691606	0.0254766	3	28.1587	26.6726
O00592	Podocalyxin	PODXL	26.8386	26.8386	NaN	NaN	1	NaN	NaN	NaN	NaN	0	26.7391	26.7391	NaN	NaN	1	NaN	NaN	NaN	NaN	0	NaN	NaN	NaN	NaN	0	NaN	NaN	NaN	NaN	0	NaN	NaN	NaN	NaN	0	NaN	NaN	NaN	NaN	0	NaN	NaN	NaN	NaN	0	NaN	NaN
O00625	Pirin	PIR	25.9725	25.9725	NaN	NaN	1	27.694	27.694	NaN	NaN	1	NaN	NaN	NaN	NaN	0	NaN	NaN	NaN	NaN	0	26.1732	26.1732	NaN	NaN	1	26.6206	26.6206	NaN	NaN	1	25.7482	25.7482	NaN	NaN	1	NaN	NaN	NaN	NaN	0	NaN	NaN	NaN	NaN	0	NaN	NaN
O00629	Importin subunit alpha-3	KPNA4	27.0573	27.0573	0.0130015	0.000480516	2	27.355	27.355	0.203852	0.00745209	2	27.3652	27.3608	0.167685	0.00612768	3	NaN	NaN	NaN	NaN	0	26.4631	26.4631	1.36935	0.0517456	2	27.5023	27.5023	NaN	NaN	1	NaN	NaN	NaN	NaN	0	NaN	NaN	NaN	NaN	0	27.6823	27.6823	NaN	NaN	1	27.0481	27.2109
O00743	Serine/threonine-protein phosphatase 6 catalytic subunit;Serine/threonine-protein phosphatase 6 catalytic subunit, N-terminally processed	PPP6C	NaN	NaN	NaN	NaN	0	NaN	NaN	NaN	NaN	0	26.8696	26.8696	NaN	NaN	1	NaN	NaN	NaN	NaN	0	NaN	NaN	NaN	NaN	0	27.3449	27.3449	NaN	NaN	1	27.4356	27.4356	NaN	NaN	1	27.142	27.142	NaN	NaN	1	NaN	NaN	NaN	NaN	0	NaN	NaN
O00762	Ubiquitin-conjugating enzyme E2 C	UBE2C	26.5966	26.5966	NaN	NaN	1	26.8181	26.8181	0.631187	0.0235358	2	NaN	NaN	NaN	NaN	0	NaN	NaN	NaN	NaN	0	NaN	NaN	NaN	NaN	0	NaN	NaN	NaN	NaN	0	NaN	NaN	NaN	NaN	0	NaN	NaN	NaN	NaN	0	NaN	NaN	NaN	NaN	0	NaN	NaN
O00764	Pyridoxal kinase	PDXK	NaN	NaN	NaN	NaN	0	NaN	NaN	NaN	NaN	0	25.5154	25.5154	NaN	NaN	1	NaN	NaN	NaN	NaN	0	NaN	NaN	NaN	NaN	0	26.4004	26.4004	NaN	NaN	1	NaN	NaN	NaN	NaN	0	NaN	NaN	NaN	NaN	0	NaN	NaN	NaN	NaN	0	NaN	NaN
O00767	Acyl-CoA desaturase	SCD	NaN	NaN	NaN	NaN	0	26.5173	26.5173	NaN	NaN	1	NaN	NaN	NaN	NaN	0	NaN	NaN	NaN	NaN	0	NaN	NaN	NaN	NaN	0	NaN	NaN	NaN	NaN	0	NaN	NaN	NaN	NaN	0	NaN	NaN	NaN	NaN	0	NaN	NaN	NaN	NaN	0	NaN	NaN
O14521	Succinate dehydrogenase [ubiquinone] cytochrome b small subunit, mitochondrial	SDHD	NaN	NaN	NaN	NaN	0	23.8003	23.8003	NaN	NaN	1	26.0572	26.0572	2.4513	0.0940736	2	NaN	NaN	NaN	NaN	0	NaN	NaN	NaN	NaN	0	NaN	NaN	NaN	NaN	0	NaN	NaN	NaN	NaN	0	NaN	NaN	NaN	NaN	0	NaN	NaN	NaN	NaN	0	NaN	23.8003
O14530	Thioredoxin domain-containing protein 9	TXNDC9	25.5161	25.5161	0.287289	0.0112591	2	NaN	NaN	NaN	NaN	0	24.583	24.583	NaN	NaN	1	24.3019	24.3019	NaN	NaN	1	25.0744	25.0744	NaN	NaN	1	NaN	NaN	NaN	NaN	0	NaN	NaN	NaN	NaN	0	NaN	NaN	NaN	NaN	0	NaN	NaN	NaN	NaN	0	25.7192	NaN
O14548	Cytochrome c oxidase subunit 7A-related protein, mitochondrial	COX7A2L	26.0788	26.0788	NaN	NaN	1	NaN	NaN	NaN	NaN	0	26.865	26.865	NaN	NaN	1	NaN	NaN	NaN	NaN	0	27.8016	27.8016	NaN	NaN	1	NaN	NaN	NaN	NaN	0	NaN	NaN	NaN	NaN	0	NaN	NaN	NaN	NaN	0	NaN	NaN	NaN	NaN	0	26.0788	NaN
O14561	Acyl carrier protein, mitochondrial	NDUFAB1	29.076	29.2268	0.627358	0.0215765	3	28.9403	29.0368	0.842499	0.0291116	3	28.8159	28.8985	0.192616	0.00668437	3	29.082	29.082	NaN	NaN	1	28.3649	28.3164	0.346637	0.0122206	3	NaN	NaN	NaN	NaN	0	NaN	NaN	NaN	NaN	0	28.3427	28.3427	NaN	NaN	1	28.2127	28.2127	NaN	NaN	1	29.6142	28.0537
O14578	Citron Rho-interacting kinase	CIT	33.565	33.0365	1.03886	0.0309505	3	22.7404	22.7404	NaN	NaN	1	33.5092	33.5092	0.456866	0.0136341	2	35.1046	35.2557	0.832081	0.0237029	3	33.4609	34.1161	1.42285	0.0425228	3	33.7301	33.7301	1.50554	0.0446349	2	34.5407	34.0098	1.52648	0.0441939	3	34.2703	34.2703	0.0789043	0.00230241	2	NaN	NaN	NaN	NaN	0	34.7619	NaN
O14617	AP-3 complex subunit delta-1	AP3D1	27.8634	27.8634	NaN	NaN	1	NaN	NaN	NaN	NaN	0	NaN	NaN	NaN	NaN	0	NaN	NaN	NaN	NaN	0	NaN	NaN	NaN	NaN	0	NaN	NaN	NaN	NaN	0	NaN	NaN	NaN	NaN	0	NaN	NaN	NaN	NaN	0	NaN	NaN	NaN	NaN	0	27.8634	NaN
O14639	Actin-binding LIM protein 1	ABLIM1	NaN	NaN	NaN	NaN	0	NaN	NaN	NaN	NaN	0	NaN	NaN	NaN	NaN	0	NaN	NaN	NaN	NaN	0	NaN	NaN	NaN	NaN	0	25.2632	25.2632	NaN	NaN	1	NaN	NaN	NaN	NaN	0	NaN	NaN	NaN	NaN	0	NaN	NaN	NaN	NaN	0	NaN	NaN
O14733	Dual specificity mitogen-activated protein kinase kinase 7	MAP2K7	28.5535	28.5535	NaN	NaN	1	NaN	NaN	NaN	NaN	0	23.2577	23.2577	NaN	NaN	1	NaN	NaN	NaN	NaN	0	NaN	NaN	NaN	NaN	0	NaN	NaN	NaN	NaN	0	28.6995	28.6995	NaN	NaN	1	28.2991	28.2991	NaN	NaN	1	NaN	NaN	NaN	NaN	0	28.5535	NaN
O14737	Programmed cell death protein 5	PDCD5	28.0261	28.0261	NaN	NaN	1	28.4942	28.4942	0.48565	0.0170438	2	27.5773	27.5773	0.396724	0.0143859	2	27.4877	27.4877	0.256144	0.00931847	2	27.5945	27.5125	0.388664	0.0140848	3	27.1634	27.1634	0.975862	0.0359256	2	27.2425	27.4063	0.374455	0.0137452	3	27.1885	27.1588	0.0586915	0.00215869	3	27.3183	27.3552	0.385715	0.0141193	3	NaN	28.8376
O14744	Protein arginine N-methyltransferase 5;Protein arginine N-methyltransferase 5, N-terminally processed	PRMT5	28.8222	28.8222	1.19274	0.0413825	2	27.6261	27.6261	0.435182	0.0157526	2	27.766	27.766	0.559678	0.0201569	2	27.7754	27.7754	0.821904	0.0295911	2	NaN	NaN	NaN	NaN	0	28.0478	27.9888	0.405414	0.0144544	3	27.6718	27.6718	0.391036	0.0141312	2	28.0861	28.0861	0.519329	0.0184906	2	NaN	NaN	NaN	NaN	0	27.9788	27.9338
O14745	Na(+)/H(+) exchange regulatory cofactor NHE-RF1	SLC9A3R1	NaN	NaN	NaN	NaN	0	NaN	NaN	NaN	NaN	0	26.0379	26.0379	NaN	NaN	1	NaN	NaN	NaN	NaN	0	26.4035	26.4035	0.0901295	0.00341354	2	25.879	25.879	0.720374	0.0278362	2	NaN	NaN	NaN	NaN	0	NaN	NaN	NaN	NaN	0	27.0801	27.0801	NaN	NaN	1	NaN	NaN
O14773	Tripeptidyl-peptidase 1	TPP1	NaN	NaN	NaN	NaN	0	NaN	NaN	NaN	NaN	0	NaN	NaN	NaN	NaN	0	NaN	NaN	NaN	NaN	0	NaN	NaN	NaN	NaN	0	25.8657	25.8657	NaN	NaN	1	NaN	NaN	NaN	NaN	0	NaN	NaN	NaN	NaN	0	NaN	NaN	NaN	NaN	0	NaN	NaN
O14776	Transcription elongation regulator 1	TCERG1	27.39	27.39	NaN	NaN	1	26.992	26.992	0.681459	0.0252466	2	26.7102	26.5882	0.357986	0.0134026	3	26.7366	26.7366	0.160127	0.00598905	2	25.8489	25.8489	0.680037	0.0263082	2	26.6728	26.6728	NaN	NaN	1	26.471	26.471	0.726774	0.0274555	2	26.7519	26.7637	0.12493	0.00466994	3	26.7487	26.7487	NaN	NaN	1	27.39	26.5102
O14787	Transportin-2	TNPO2	27.5799	27.5369	0.405109	0.0146885	3	27.3908	27.3941	0.255493	0.00932768	3	27.1998	27.2	0.323314	0.0118866	3	27.4765	27.4765	0.355363	0.0129334	2	27.664	27.6812	0.458553	0.0165758	3	27.543	27.5245	0.493237	0.0179079	3	NaN	NaN	NaN	NaN	0	27.268	27.268	NaN	NaN	1	27.479	27.479	NaN	NaN	1	27.5369	27.3941
O14791	Apolipoprotein L1	APOL1	29.1705	29.8633	1.21406	0.0416194	3	30.1053	31.1718	2.02773	0.0673547	3	29.2106	29.2106	0.959404	0.0328444	2	31.3481	31.3481	0.374598	0.0119496	2	31.3555	31.5995	0.523754	0.0167037	3	30.399	30.474	0.677138	0.022275	3	31.9738	31.9738	0.410807	0.0128483	2	29.6725	29.6725	0.3699	0.0124661	2	29.1824	29.1824	NaN	NaN	1	27.7686	27.7669
O14802	DNA-directed RNA polymerase III subunit RPC1	POLR3A	NaN	NaN	NaN	NaN	0	29.6558	29.6558	NaN	NaN	1	29.3297	29.3297	NaN	NaN	1	NaN	NaN	NaN	NaN	0	NaN	NaN	NaN	NaN	0	NaN	NaN	NaN	NaN	0	NaN	NaN	NaN	NaN	0	NaN	NaN	NaN	NaN	0	NaN	NaN	NaN	NaN	0	NaN	29.6558
O14818	Proteasome subunit alpha type-7	PSMA7	29.2642	29.3435	0.162481	0.00555222	3	29.6497	29.9326	0.567891	0.0191533	3	29.5206	29.3374	0.411385	0.0139355	3	29.324	29.324	1.0735	0.0366084	2	29.4982	29.4816	0.0595933	0.00202023	3	29.0173	28.9783	0.569409	0.0196231	3	28.632	28.632	0.401628	0.0140272	2	29.5802	29.9158	0.596539	0.0201668	3	29.3342	29.3342	NaN	NaN	1	29.3718	28.9959
O14828	Secretory carrier-associated membrane protein 3	SCAMP3	27.7716	27.7716	NaN	NaN	1	28.086	28.086	NaN	NaN	1	NaN	NaN	NaN	NaN	0	NaN	NaN	NaN	NaN	0	27.6497	27.6497	NaN	NaN	1	25.6229	25.6229	NaN	NaN	1	NaN	NaN	NaN	NaN	0	NaN	NaN	NaN	NaN	0	NaN	NaN	NaN	NaN	0	NaN	28.086
O14907	Tax1-binding protein 3	TAX1BP3	28.2688	28.2688	NaN	NaN	1	NaN	NaN	NaN	NaN	0	26.4081	26.4081	NaN	NaN	1	NaN	NaN	NaN	NaN	0	NaN	NaN	NaN	NaN	0	NaN	NaN	NaN	NaN	0	NaN	NaN	NaN	NaN	0	NaN	NaN	NaN	NaN	0	NaN	NaN	NaN	NaN	0	28.2688	NaN
O14910	Protein lin-7 homolog A	LIN7A	26.7188	26.7188	NaN	NaN	1	NaN	NaN	NaN	NaN	0	NaN	NaN	NaN	NaN	0	NaN	NaN	NaN	NaN	0	NaN	NaN	NaN	NaN	0	NaN	NaN	NaN	NaN	0	NaN	NaN	NaN	NaN	0	NaN	NaN	NaN	NaN	0	NaN	NaN	NaN	NaN	0	26.7188	NaN
O14936	Peripheral plasma membrane protein CASK	CASK	NaN	NaN	NaN	NaN	0	25.2303	25.2303	0.178956	0.0070929	2	25.8462	25.8462	NaN	NaN	1	26.3845	26.3845	NaN	NaN	1	NaN	NaN	NaN	NaN	0	26.2102	26.2102	NaN	NaN	1	NaN	NaN	NaN	NaN	0	NaN	NaN	NaN	NaN	0	NaN	NaN	NaN	NaN	0	NaN	25.1038
O14949	Cytochrome b-c1 complex subunit 8	UQCRQ	26.5306	26.5306	0.0511602	0.00192835	2	26.7084	26.7265	0.397788	0.0148938	3	26.0469	26.0469	0.399904	0.0153533	2	27.2867	27.2867	NaN	NaN	1	25.1083	25.1083	NaN	NaN	1	25.7371	25.7371	0.0587062	0.00228099	2	NaN	NaN	NaN	NaN	0	27.175	27.175	NaN	NaN	1	26.2903	26.2903	NaN	NaN	1	26.4944	26.7265
O14964	Hepatocyte growth factor-regulated tyrosine kinase substrate	HGS	27.0145	27.0145	1.59668	0.0591045	2	26.6809	26.6809	0.69615	0.0260917	2	26.4536	26.4536	0.159087	0.00601383	2	NaN	NaN	NaN	NaN	0	NaN	NaN	NaN	NaN	0	26.5078	26.5078	NaN	NaN	1	28.205	28.205	NaN	NaN	1	NaN	NaN	NaN	NaN	0	NaN	NaN	NaN	NaN	0	28.1435	26.1886
O14976	Cyclin-G-associated kinase	GAK	NaN	NaN	NaN	NaN	0	NaN	NaN	NaN	NaN	0	NaN	NaN	NaN	NaN	0	NaN	NaN	NaN	NaN	0	24.8274	24.8274	NaN	NaN	1	NaN	NaN	NaN	NaN	0	NaN	NaN	NaN	NaN	0	NaN	NaN	NaN	NaN	0	NaN	NaN	NaN	NaN	0	NaN	NaN
O14979	Heterogeneous nuclear ribonucleoprotein D-like	HNRNPDL	29.9756	29.8479	0.448477	0.0149614	3	29.8676	29.8991	0.190658	0.00638342	3	29.7689	29.9436	0.30537	0.010258	3	30.4709	30.1802	0.781448	0.0256457	3	30.3193	30.306	0.373006	0.0123026	3	31.075	30.8551	0.792886	0.0255153	3	31.0879	31.104	0.0297917	0.000958307	3	30.8829	31.0404	0.4841	0.0156753	3	31.4955	31.3904	0.284286	0.00902624	3	29.6049	29.8991
O14980	Exportin-1	XPO1	27.7056	27.8512	0.531959	0.0192005	3	27.5543	27.0776	0.97979	0.0355585	3	28.0643	27.7565	0.537163	0.0191404	3	27.1782	27.1782	0.0799185	0.00294054	2	27.6925	27.9648	0.540023	0.0195007	3	27.0989	26.972	0.302501	0.0111628	3	27.3979	27.3398	0.801336	0.029248	3	27.717	27.5137	0.474804	0.0171304	3	26.1801	26.1801	0.0119953	0.000458185	2	27.1159	28.6812
O15020	Spectrin beta chain, non-erythrocytic 2	SPTBN2	29.0734	29.1357	0.717642	0.0246838	3	29.0793	29.0793	0.946823	0.03256	2	28.7179	28.9248	0.40938	0.0142552	3	29.2436	29.2436	NaN	NaN	1	28.3043	28.3043	NaN	NaN	1	NaN	NaN	NaN	NaN	0	NaN	NaN	NaN	NaN	0	NaN	NaN	NaN	NaN	0	NaN	NaN	NaN	NaN	0	29.1357	NaN
O15027	Protein transport protein Sec16A	SEC16A	23.4429	23.4429	NaN	NaN	1	NaN	NaN	NaN	NaN	0	24.4663	24.4663	NaN	NaN	1	NaN	NaN	NaN	NaN	0	NaN	NaN	NaN	NaN	0	26.0365	26.0365	NaN	NaN	1	NaN	NaN	NaN	NaN	0	NaN	NaN	NaN	NaN	0	NaN	NaN	NaN	NaN	0	NaN	NaN
O15042	U2 snRNP-associated SURP motif-containing protein	U2SURP	NaN	NaN	NaN	NaN	0	NaN	NaN	NaN	NaN	0	26.7951	26.7951	NaN	NaN	1	26.5943	26.5943	NaN	NaN	1	NaN	NaN	NaN	NaN	0	NaN	NaN	NaN	NaN	0	23.4486	23.4486	NaN	NaN	1	NaN	NaN	NaN	NaN	0	NaN	NaN	NaN	NaN	0	NaN	NaN
O15067	Phosphoribosylformylglycinamidine synthase	PFAS	27.7654	27.6938	1.14325	0.0411755	3	28.3808	28.4371	0.138195	0.00486932	3	28.5908	28.0477	1.11841	0.0391178	3	28.8078	28.8078	0.597093	0.0207268	2	28.8484	28.8793	0.129568	0.00449135	3	29.6364	29.6364	0.166991	0.00563464	2	29.0911	29.0911	0.70437	0.0242125	2	28.1103	28.1103	0.72426	0.0257649	2	28.3724	28.3724	NaN	NaN	1	27.6938	28.2234
O15111	Inhibitor of nuclear factor kappa-B kinase subunit alpha	CHUK	NaN	NaN	NaN	NaN	0	NaN	NaN	NaN	NaN	0	NaN	NaN	NaN	NaN	0	NaN	NaN	NaN	NaN	0	NaN	NaN	NaN	NaN	0	26.6779	26.6779	NaN	NaN	1	NaN	NaN	NaN	NaN	0	NaN	NaN	NaN	NaN	0	NaN	NaN	NaN	NaN	0	NaN	NaN
O15126	Secretory carrier-associated membrane protein 1	SCAMP1	NaN	NaN	NaN	NaN	0	26.9805	26.9805	NaN	NaN	1	NaN	NaN	NaN	NaN	0	NaN	NaN	NaN	NaN	0	27.6614	27.6614	NaN	NaN	1	26.5929	26.5929	NaN	NaN	1	NaN	NaN	NaN	NaN	0	NaN	NaN	NaN	NaN	0	NaN	NaN	NaN	NaN	0	NaN	NaN
O15127	Secretory carrier-associated membrane protein 2	SCAMP2	NaN	NaN	NaN	NaN	0	27.1286	27.1286	NaN	NaN	1	NaN	NaN	NaN	NaN	0	NaN	NaN	NaN	NaN	0	NaN	NaN	NaN	NaN	0	NaN	NaN	NaN	NaN	0	NaN	NaN	NaN	NaN	0	NaN	NaN	NaN	NaN	0	NaN	NaN	NaN	NaN	0	NaN	NaN
O15143	Actin-related protein 2/3 complex subunit 1B	ARPC1B	26.3961	26.3961	NaN	NaN	1	NaN	NaN	NaN	NaN	0	26.9228	27.0172	0.505271	0.0187674	3	NaN	NaN	NaN	NaN	0	NaN	NaN	NaN	NaN	0	26.1525	26.1525	NaN	NaN	1	NaN	NaN	NaN	NaN	0	27.2617	27.2617	0.826015	0.0302995	2	27.558	27.558	NaN	NaN	1	26.3961	NaN
O15144	Actin-related protein 2/3 complex subunit 2	ARPC2	27.9371	28.1315	0.450103	0.0161113	3	27.9089	27.9089	0.510337	0.0182858	2	27.6493	27.5603	0.220742	0.00798362	3	27.4235	27.0001	0.820326	0.0299132	3	27.5933	27.5662	0.218921	0.00793385	3	27.3491	27.3491	0.120346	0.00440036	2	28.0718	28.0718	0.0803595	0.00286265	2	27.7354	27.8898	0.706193	0.0254618	3	28.3616	28.3616	0.0235429	0.000830096	2	28.1315	28.2698
O15145	Actin-related protein 2/3 complex subunit 3	ARPC3	27.2545	27.2545	NaN	NaN	1	27.0018	27.0018	0.311313	0.0115293	2	26.5743	26.5743	0.182896	0.00688244	2	27.8428	27.8428	NaN	NaN	1	26.6986	26.6986	NaN	NaN	1	NaN	NaN	NaN	NaN	0	NaN	NaN	NaN	NaN	0	NaN	NaN	NaN	NaN	0	NaN	NaN	NaN	NaN	0	NaN	26.7817
O15160	DNA-directed RNA polymerases I and III subunit RPAC1	POLR1C	NaN	NaN	NaN	NaN	0	NaN	NaN	NaN	NaN	0	NaN	NaN	NaN	NaN	0	NaN	NaN	NaN	NaN	0	27.3954	27.3954	NaN	NaN	1	NaN	NaN	NaN	NaN	0	NaN	NaN	NaN	NaN	0	NaN	NaN	NaN	NaN	0	NaN	NaN	NaN	NaN	0	NaN	NaN
O15212	Prefoldin subunit 6	PFDN6	27.684	27.684	0.212744	0.00768472	2	27.5684	27.6235	0.476487	0.0172838	3	27.9621	28.0338	0.156145	0.00558417	3	28.0166	28.0166	NaN	NaN	1	27.3941	27.3941	NaN	NaN	1	28.0811	28.0811	0.232578	0.00828235	2	NaN	NaN	NaN	NaN	0	27.8453	27.8453	NaN	NaN	1	26.881	26.881	NaN	NaN	1	27.8344	28.0149
O15269	Serine palmitoyltransferase 1	SPTLC1	NaN	NaN	NaN	NaN	0	25.3606	25.3606	NaN	NaN	1	NaN	NaN	NaN	NaN	0	NaN	NaN	NaN	NaN	0	NaN	NaN	NaN	NaN	0	NaN	NaN	NaN	NaN	0	NaN	NaN	NaN	NaN	0	NaN	NaN	NaN	NaN	0	NaN	NaN	NaN	NaN	0	NaN	NaN
O15270	Serine palmitoyltransferase 2	SPTLC2	35.2985	35.4036	1.3843	0.0392168	3	34.9017	34.9017	0.00193943	5.55684e-05	2	34.5074	34.5074	0.259544	0.00752139	2	37.3782	37.3782	0.134282	0.00359252	2	33.5509	33.3496	1.88806	0.0562745	3	35.7557	35.7557	NaN	NaN	1	36.0476	35.1537	1.6748	0.0464609	3	34.7794	34.9381	0.419538	0.0120628	3	35.22	36.1064	2.26596	0.0643374	3	35.4036	34.9003
O15294	UDP-N-acetylglucosamine--peptide N-acetylglucosaminyltransferase 110 kDa subunit	OGT	24.8778	24.8778	NaN	NaN	1	25.0438	25.0438	NaN	NaN	1	28.2052	28.2052	NaN	NaN	1	27.2755	27.2755	NaN	NaN	1	NaN	NaN	NaN	NaN	0	27.4753	27.4753	NaN	NaN	1	NaN	NaN	NaN	NaN	0	28.1775	28.1775	NaN	NaN	1	NaN	NaN	NaN	NaN	0	NaN	NaN
O15305	Phosphomannomutase 2	PMM2	27.7024	27.7024	NaN	NaN	1	27.3309	27.3309	NaN	NaN	1	27.2959	27.2959	0.0755137	0.00276648	2	NaN	NaN	NaN	NaN	0	27.3759	27.3759	0.341744	0.0124834	2	NaN	NaN	NaN	NaN	0	NaN	NaN	NaN	NaN	0	NaN	NaN	NaN	NaN	0	NaN	NaN	NaN	NaN	0	NaN	27.3309
O15347	High mobility group protein B3	HMGB3	27.2464	27.2464	NaN	NaN	1	28.7093	28.7093	NaN	NaN	1	28.455	28.455	0.289506	0.0101742	2	NaN	NaN	NaN	NaN	0	28.7141	28.7141	NaN	NaN	1	27.582	27.4737	0.632666	0.0229376	3	NaN	NaN	NaN	NaN	0	NaN	NaN	NaN	NaN	0	28.1089	28.1089	NaN	NaN	1	27.2464	NaN
O15355	Protein phosphatase 1G	PPM1G	26.8465	26.8415	0.714427	0.0266116	3	26.8345	26.881	0.252484	0.00940894	3	26.7879	26.8236	0.16182	0.00604077	3	25.9273	25.9273	NaN	NaN	1	26.838	26.8891	0.129362	0.00482011	3	26.6393	26.6393	NaN	NaN	1	NaN	NaN	NaN	NaN	0	27.9549	27.9549	NaN	NaN	1	26.4627	26.4627	NaN	NaN	1	27.5634	26.881
O15371	Eukaryotic translation initiation factor 3 subunit D	EIF3D	27.8961	27.9337	0.0716171	0.00256728	3	27.8223	27.8223	0.256674	0.00922547	2	27.9592	27.8399	0.208366	0.00745251	3	NaN	NaN	NaN	NaN	0	28.1057	28.0698	0.449379	0.0159889	3	27.8117	27.8117	NaN	NaN	1	28.3086	28.3086	NaN	NaN	1	NaN	NaN	NaN	NaN	0	28.6457	28.6457	NaN	NaN	1	27.8135	28.0038
O15372	Eukaryotic translation initiation factor 3 subunit H	EIF3H	27.5102	27.5932	0.19453	0.00707122	3	27.3392	27.2988	0.300688	0.0109984	3	27.2021	27.4321	0.540541	0.0198713	3	27.0994	27.0994	NaN	NaN	1	27.8935	27.8935	NaN	NaN	1	26.7228	26.7228	0.450757	0.0168679	2	25.506	25.506	NaN	NaN	1	NaN	NaN	NaN	NaN	0	25.9745	25.9745	NaN	NaN	1	27.5932	27.2988
O15382	Branched-chain-amino-acid aminotransferase, mitochondrial	BCAT2	NaN	NaN	NaN	NaN	0	NaN	NaN	NaN	NaN	0	NaN	NaN	NaN	NaN	0	NaN	NaN	NaN	NaN	0	NaN	NaN	NaN	NaN	0	NaN	NaN	NaN	NaN	0	28.2689	28.2689	NaN	NaN	1	27.8651	27.8651	0.0778456	0.00279366	2	NaN	NaN	NaN	NaN	0	NaN	NaN
O15427	Monocarboxylate transporter 4	SLC16A3	26.3979	26.3979	NaN	NaN	1	NaN	NaN	NaN	NaN	0	NaN	NaN	NaN	NaN	0	NaN	NaN	NaN	NaN	0	NaN	NaN	NaN	NaN	0	NaN	NaN	NaN	NaN	0	NaN	NaN	NaN	NaN	0	NaN	NaN	NaN	NaN	0	NaN	NaN	NaN	NaN	0	NaN	NaN
O15446	DNA-directed RNA polymerase I subunit RPA34	CD3EAP	NaN	NaN	NaN	NaN	0	NaN	NaN	NaN	NaN	0	NaN	NaN	NaN	NaN	0	NaN	NaN	NaN	NaN	0	NaN	NaN	NaN	NaN	0	26.6294	26.6294	NaN	NaN	1	NaN	NaN	NaN	NaN	0	NaN	NaN	NaN	NaN	0	NaN	NaN	NaN	NaN	0	NaN	NaN
O15479	Melanoma-associated antigen B2	MAGEB2	27.336	27.336	0.530706	0.0194142	2	27.2474	27.2474	0.312329	0.0114627	2	27.0979	27.1746	0.267724	0.00987986	3	26.6553	26.6553	0.351329	0.0131805	2	27.318	27.3178	0.2337	0.00855479	3	27.7587	27.7587	0.322846	0.0116304	2	27.0197	27.0197	NaN	NaN	1	26.6072	26.3684	0.49968	0.0187799	3	26.5035	26.5035	0.575026	0.0216962	2	27.7112	27.4682
O15498	Synaptobrevin homolog YKT6	YKT6	NaN	NaN	NaN	NaN	0	NaN	NaN	NaN	NaN	0	NaN	NaN	NaN	NaN	0	NaN	NaN	NaN	NaN	0	NaN	NaN	NaN	NaN	0	NaN	NaN	NaN	NaN	0	24.6601	24.6601	NaN	NaN	1	NaN	NaN	NaN	NaN	0	25.2173	25.2173	NaN	NaN	1	NaN	NaN
O43143	Pre-mRNA-splicing factor ATP-dependent RNA helicase DHX15	DHX15	27.287	27.287	0.753311	0.027607	2	26.6247	26.6247	0.196402	0.00737667	2	27.154	27.154	0.0043037	0.000158492	2	27.5818	27.5818	0.334913	0.0121425	2	26.9963	26.6108	0.84697	0.0313736	3	27.1691	27.1691	0.35287	0.0129879	2	26.5459	26.5459	0.175443	0.00660904	2	26.969	26.969	0.210308	0.00779813	2	27.6234	27.5971	0.356925	0.0129211	3	27.8196	26.4858
O43148	mRNA cap guanine-N7 methyltransferase	RNMT	25.5899	25.5899	0.145852	0.0056996	2	26.0162	26.0162	NaN	NaN	1	NaN	NaN	NaN	NaN	0	NaN	NaN	NaN	NaN	0	25.3309	25.3309	0.383782	0.0151508	2	NaN	NaN	NaN	NaN	0	NaN	NaN	NaN	NaN	0	NaN	NaN	NaN	NaN	0	NaN	NaN	NaN	NaN	0	25.4868	NaN
O43159	Ribosomal RNA-processing protein 8	RRP8	NaN	NaN	NaN	NaN	0	NaN	NaN	NaN	NaN	0	NaN	NaN	NaN	NaN	0	21.8292	21.8292	NaN	NaN	1	NaN	NaN	NaN	NaN	0	NaN	NaN	NaN	NaN	0	NaN	NaN	NaN	NaN	0	NaN	NaN	NaN	NaN	0	NaN	NaN	NaN	NaN	0	NaN	NaN
O43169	Cytochrome b5 type B	CYB5B	26.98	26.98	0.455538	0.0168843	2	27.5147	27.5147	NaN	NaN	1	27.9754	28.045	0.326793	0.0116814	3	28.0798	28.0798	NaN	NaN	1	27.3217	27.3217	NaN	NaN	1	27.1183	27.1183	NaN	NaN	1	28.6795	28.6795	NaN	NaN	1	27.7847	27.7847	0.200952	0.00723248	2	27.4896	27.4896	NaN	NaN	1	NaN	27.5147
O43172	U4/U6 small nuclear ribonucleoprotein Prp4	PRPF4	26.7287	26.7287	NaN	NaN	1	27.3201	27.3201	NaN	NaN	1	28.4413	28.4413	NaN	NaN	1	NaN	NaN	NaN	NaN	0	25.1521	25.1521	NaN	NaN	1	25.4231	25.4231	NaN	NaN	1	NaN	NaN	NaN	NaN	0	26.2181	26.2181	NaN	NaN	1	NaN	NaN	NaN	NaN	0	NaN	27.3201
O43175	D-3-phosphoglycerate dehydrogenase	PHGDH	30.3232	30.2278	0.431275	0.0142226	3	30.5807	30.6175	0.406576	0.0132952	3	30.6596	30.5981	0.181083	0.00590624	3	30.8525	30.8799	0.0781282	0.00253231	3	30.3885	30.3978	0.288159	0.0094825	3	30.7566	30.72	0.370611	0.0120498	3	30.3644	30.2625	0.21728	0.00715575	3	30.5677	30.8465	0.523096	0.0171127	3	29.7658	29.8851	0.748037	0.0251307	3	30.2278	30.157
O43181	NADH dehydrogenase [ubiquinone] iron-sulfur protein 4, mitochondrial	NDUFS4	27.2551	27.2644	0.454523	0.0166766	3	27.2348	27.2348	0.370389	0.0135998	2	26.9915	26.8415	0.399439	0.0147987	3	27.0219	26.9927	0.257554	0.00953131	3	26.848	26.9637	0.401055	0.014938	3	26.8206	26.8206	0.287041	0.0107022	2	27.305	27.305	NaN	NaN	1	27.7782	27.7782	0.193599	0.00696945	2	NaN	NaN	NaN	NaN	0	26.796	27.4967
O43242	26S proteasome non-ATPase regulatory subunit 3	PSMD3	27.8929	27.8929	NaN	NaN	1	27.3809	27.3809	NaN	NaN	1	27.2084	27.151	0.427295	0.0157045	3	NaN	NaN	NaN	NaN	0	27.1534	27.1534	NaN	NaN	1	26.6457	26.6457	NaN	NaN	1	27.9518	27.9518	NaN	NaN	1	28.7349	28.7349	NaN	NaN	1	NaN	NaN	NaN	NaN	0	NaN	NaN
O43252	Bifunctional 3-phosphoadenosine 5-phosphosulfate synthase 1;Sulfate adenylyltransferase;Adenylyl-sulfate kinase	PAPSS1	26.7045	26.7045	NaN	NaN	1	26.9104	26.9104	NaN	NaN	1	NaN	NaN	NaN	NaN	0	NaN	NaN	NaN	NaN	0	27.8299	27.8299	0.384147	0.0138034	2	27.183	27.183	1.52204	0.0559921	2	NaN	NaN	NaN	NaN	0	27.4101	27.4101	NaN	NaN	1	NaN	NaN	NaN	NaN	0	26.7045	NaN
O43290	U4/U6.U5 tri-snRNP-associated protein 1	SART1	NaN	NaN	NaN	NaN	0	NaN	NaN	NaN	NaN	0	28.137	28.137	NaN	NaN	1	26.7988	26.7988	NaN	NaN	1	NaN	NaN	NaN	NaN	0	NaN	NaN	NaN	NaN	0	NaN	NaN	NaN	NaN	0	NaN	NaN	NaN	NaN	0	NaN	NaN	NaN	NaN	0	NaN	NaN
O43324	Eukaryotic translation elongation factor 1 epsilon-1	EEF1E1	25.5517	25.5517	NaN	NaN	1	25.7569	25.7569	NaN	NaN	1	25.0696	25.0696	NaN	NaN	1	26.5234	26.5234	NaN	NaN	1	26.7803	26.6725	0.275446	0.0102854	3	NaN	NaN	NaN	NaN	0	27.7871	27.7871	NaN	NaN	1	27.6378	27.6378	0.139203	0.00503669	2	28.5501	28.5501	NaN	NaN	1	25.5517	NaN
O43347	RNA-binding protein Musashi homolog 1	MSI1	26.3947	26.3947	NaN	NaN	1	NaN	NaN	NaN	NaN	0	25.3725	25.3725	NaN	NaN	1	NaN	NaN	NaN	NaN	0	NaN	NaN	NaN	NaN	0	NaN	NaN	NaN	NaN	0	NaN	NaN	NaN	NaN	0	NaN	NaN	NaN	NaN	0	NaN	NaN	NaN	NaN	0	26.3947	NaN
O43390	Heterogeneous nuclear ribonucleoprotein R	HNRNPR	29.3191	29.2818	0.539115	0.0183878	3	29.0374	29.195	0.762493	0.026259	3	29.0976	29.0897	0.207201	0.00712089	3	29.6699	29.933	0.859237	0.0289598	3	29.3866	29.1112	0.666381	0.0226764	3	29.9035	30.0038	0.271095	0.00906565	3	29.5635	29.5635	0.0809799	0.00273918	2	29.0518	29.3661	0.616515	0.0212213	3	28.2842	28.3104	1.41452	0.0500108	3	29.8759	29.7088
O43396	Thioredoxin-like protein 1	TXNL1	NaN	NaN	NaN	NaN	0	25.8549	25.8549	0.0226581	0.000876357	2	25.9164	25.9164	NaN	NaN	1	NaN	NaN	NaN	NaN	0	25.2204	25.2204	1.60046	0.063459	2	24.7156	24.7156	NaN	NaN	1	NaN	NaN	NaN	NaN	0	NaN	NaN	NaN	NaN	0	NaN	NaN	NaN	NaN	0	NaN	25.871
O43399	Tumor protein D54	TPD52L2	27.596	27.7314	0.759511	0.0275225	3	28.5068	28.5068	1.54265	0.0541151	2	26.8774	26.8774	NaN	NaN	1	NaN	NaN	NaN	NaN	0	28.6619	28.6619	NaN	NaN	1	27.4511	27.4511	1.45785	0.0531071	2	26.6589	26.6589	NaN	NaN	1	NaN	NaN	NaN	NaN	0	NaN	NaN	NaN	NaN	0	28.2787	NaN
O43432	Eukaryotic translation initiation factor 4 gamma 3	EIF4G3	27.9656	28.2611	0.676331	0.0241844	3	28.4567	28.3225	0.330731	0.0116222	3	28.4888	28.4362	0.20357	0.0071456	3	28.4412	28.6854	0.484274	0.0170272	3	28.1706	28.4017	0.560203	0.0198861	3	27.9003	28.035	0.719961	0.0258048	3	27.5788	27.5788	0.270178	0.00979657	2	27.0785	27.0475	0.0623738	0.00230344	3	28.1632	28.1632	0.303351	0.0107712	2	28.2611	28.8335
O43447	Peptidyl-prolyl cis-trans isomerase H	PPIH	26.6452	26.6452	0.143564	0.00538796	2	26.7474	26.7474	0.0182007	0.000680466	2	26.5195	26.4867	0.142977	0.00539139	3	27.2137	27.2137	NaN	NaN	1	27.1192	27.1192	0.131255	0.00483993	2	27.0548	27.0548	0.256385	0.00947651	2	27.0592	27.0592	NaN	NaN	1	26.8186	26.8186	NaN	NaN	1	27.2019	27.2019	0.071883	0.00264258	2	26.5437	26.7345
O43488	Aflatoxin B1 aldehyde reductase member 2	AKR7A2	NaN	NaN	NaN	NaN	0	NaN	NaN	NaN	NaN	0	NaN	NaN	NaN	NaN	0	NaN	NaN	NaN	NaN	0	NaN	NaN	NaN	NaN	0	28.0586	28.0586	NaN	NaN	1	28.4642	28.4642	NaN	NaN	1	NaN	NaN	NaN	NaN	0	NaN	NaN	NaN	NaN	0	NaN	NaN
O43491	Band 4.1-like protein 2	EPB41L2	NaN	NaN	NaN	NaN	0	NaN	NaN	NaN	NaN	0	NaN	NaN	NaN	NaN	0	NaN	NaN	NaN	NaN	0	26.1859	26.1859	0.149618	0.00571369	2	26.7585	26.7585	NaN	NaN	1	26.9785	26.9785	NaN	NaN	1	NaN	NaN	NaN	NaN	0	NaN	NaN	NaN	NaN	0	NaN	NaN
O43504	Ragulator complex protein LAMTOR5	LAMTOR5	27.171	27.171	0.0728985	0.00268296	2	26.7742	26.7742	NaN	NaN	1	26.6518	26.6518	NaN	NaN	1	26.039	26.039	NaN	NaN	1	26.0496	26.0496	1.08707	0.0417306	2	25.6226	25.6226	0.625001	0.0243925	2	NaN	NaN	NaN	NaN	0	NaN	NaN	NaN	NaN	0	NaN	NaN	NaN	NaN	0	27.2225	26.7742
O43592	Exportin-T	XPOT	26.3736	26.3736	NaN	NaN	1	26.5303	26.5303	0.201102	0.00758008	2	26.7543	26.7543	NaN	NaN	1	26.8347	26.8347	NaN	NaN	1	25.9391	25.9391	NaN	NaN	1	NaN	NaN	NaN	NaN	0	NaN	NaN	NaN	NaN	0	NaN	NaN	NaN	NaN	0	NaN	NaN	NaN	NaN	0	NaN	26.3881
O43598	2-deoxynucleoside 5-phosphate N-hydrolase 1	DNPH1	NaN	NaN	NaN	NaN	0	NaN	NaN	NaN	NaN	0	NaN	NaN	NaN	NaN	0	NaN	NaN	NaN	NaN	0	22.3529	22.3529	NaN	NaN	1	NaN	NaN	NaN	NaN	0	NaN	NaN	NaN	NaN	0	NaN	NaN	NaN	NaN	0	NaN	NaN	NaN	NaN	0	NaN	NaN
O43615	Mitochondrial import inner membrane translocase subunit TIM44	TIMM44	24.1779	24.1779	1.34291	0.0555429	2	24.3189	24.3189	NaN	NaN	1	24.0616	24.0616	0.611106	0.0253976	2	27.1016	27.1016	NaN	NaN	1	25.7757	25.7757	0.401915	0.0155928	2	27.3002	27.3002	1.2103	0.0443331	2	26.2573	26.2573	1.18171	0.0450052	2	26.0262	26.0262	0.650675	0.0250008	2	27.7007	27.7007	NaN	NaN	1	23.2283	NaN
O43660	Pleiotropic regulator 1	PLRG1	NaN	NaN	NaN	NaN	0	NaN	NaN	NaN	NaN	0	NaN	NaN	NaN	NaN	0	NaN	NaN	NaN	NaN	0	26.0971	26.0971	NaN	NaN	1	NaN	NaN	NaN	NaN	0	NaN	NaN	NaN	NaN	0	NaN	NaN	NaN	NaN	0	NaN	NaN	NaN	NaN	0	NaN	NaN
O43670	BUB3-interacting and GLEBS motif-containing protein ZNF207	ZNF207	NaN	NaN	NaN	NaN	0	NaN	NaN	NaN	NaN	0	NaN	NaN	NaN	NaN	0	26.2596	26.2596	NaN	NaN	1	26.4749	26.4749	NaN	NaN	1	26.3712	26.3712	NaN	NaN	1	26.4063	26.5148	0.414248	0.0156875	3	26.3994	26.3994	0.19183	0.00726643	2	NaN	NaN	NaN	NaN	0	NaN	NaN
O43674	NADH dehydrogenase [ubiquinone] 1 beta subcomplex subunit 5, mitochondrial	NDUFB5	NaN	NaN	NaN	NaN	0	NaN	NaN	NaN	NaN	0	NaN	NaN	NaN	NaN	0	NaN	NaN	NaN	NaN	0	NaN	NaN	NaN	NaN	0	24.6375	24.6375	NaN	NaN	1	NaN	NaN	NaN	NaN	0	NaN	NaN	NaN	NaN	0	NaN	NaN	NaN	NaN	0	NaN	NaN
O43676	NADH dehydrogenase [ubiquinone] 1 beta subcomplex subunit 3	NDUFB3	NaN	NaN	NaN	NaN	0	NaN	NaN	NaN	NaN	0	NaN	NaN	NaN	NaN	0	NaN	NaN	NaN	NaN	0	NaN	NaN	NaN	NaN	0	26.3684	26.3684	0.0598472	0.00226966	2	NaN	NaN	NaN	NaN	0	NaN	NaN	NaN	NaN	0	26.8363	26.8363	NaN	NaN	1	NaN	NaN
O43678	NADH dehydrogenase [ubiquinone] 1 alpha subcomplex subunit 2	NDUFA2	27.8489	27.8489	NaN	NaN	1	27.231	27.231	NaN	NaN	1	27.4858	27.4858	0.16352	0.00594926	2	26.7001	26.7001	NaN	NaN	1	NaN	NaN	NaN	NaN	0	NaN	NaN	NaN	NaN	0	28.5497	28.5497	NaN	NaN	1	29.3695	29.3695	0.17897	0.00609372	2	NaN	NaN	NaN	NaN	0	27.8489	27.231
O43681	ATPase ASNA1	ASNA1	NaN	NaN	NaN	NaN	0	NaN	NaN	NaN	NaN	0	NaN	NaN	NaN	NaN	0	NaN	NaN	NaN	NaN	0	NaN	NaN	NaN	NaN	0	26.1439	26.1439	NaN	NaN	1	NaN	NaN	NaN	NaN	0	NaN	NaN	NaN	NaN	0	NaN	NaN	NaN	NaN	0	NaN	NaN
O43684	Mitotic checkpoint protein BUB3	BUB3	27.3426	27.3426	NaN	NaN	1	27.0964	27.0964	0.455044	0.0167935	2	26.9672	26.8808	0.164323	0.00609343	3	NaN	NaN	NaN	NaN	0	26.8808	26.8808	NaN	NaN	1	NaN	NaN	NaN	NaN	0	27.0898	27.0898	NaN	NaN	1	27.2503	27.2503	NaN	NaN	1	27.215	27.215	NaN	NaN	1	NaN	26.7747
O43707	Alpha-actinin-4	ACTN4	29.706	29.786	0.235836	0.007939	3	29.7817	29.7206	0.283832	0.00953042	3	29.8357	29.7994	0.215663	0.00722835	3	29.8301	29.8873	0.255765	0.00857405	3	29.7507	29.7741	0.440064	0.0147917	3	29.9471	29.9272	0.330633	0.0110406	3	29.595	29.5081	0.167525	0.00566058	3	29.4939	29.5025	0.299729	0.0101624	3	28.8971	29.499	1.41487	0.0489624	3	29.4405	30.0911
O43715	TP53-regulated inhibitor of apoptosis 1	TRIAP1	24.8344	24.8344	NaN	NaN	1	NaN	NaN	NaN	NaN	0	NaN	NaN	NaN	NaN	0	NaN	NaN	NaN	NaN	0	NaN	NaN	NaN	NaN	0	NaN	NaN	NaN	NaN	0	NaN	NaN	NaN	NaN	0	NaN	NaN	NaN	NaN	0	NaN	NaN	NaN	NaN	0	NaN	NaN
O43719	HIV Tat-specific factor 1	HTATSF1	27.5094	27.5094	1.8817	0.0684019	2	25.5229	25.5229	0.564451	0.0221155	2	26.0067	26.0067	NaN	NaN	1	NaN	NaN	NaN	NaN	0	27.0459	27.0459	NaN	NaN	1	NaN	NaN	NaN	NaN	0	NaN	NaN	NaN	NaN	0	NaN	NaN	NaN	NaN	0	NaN	NaN	NaN	NaN	0	28.84	25.922
O43747	AP-1 complex subunit gamma-1	AP1G1	26.3068	26.3622	0.281036	0.010683	3	26.3058	26.4342	0.257338	0.00978258	3	26.0585	26.0289	0.104087	0.00399437	3	26.8577	26.8947	0.861346	0.0320708	3	26.3689	26.4352	0.589033	0.0223381	3	27.1475	27.1475	0.699198	0.0257555	2	26.8604	26.8604	1.5376	0.0572439	2	26.2049	26.2049	NaN	NaN	1	26.6798	26.6798	0.975463	0.0365619	2	26.3622	26.4342
O43760	Synaptogyrin-2	SYNGR2	NaN	NaN	NaN	NaN	0	25.939	25.939	NaN	NaN	1	NaN	NaN	NaN	NaN	0	NaN	NaN	NaN	NaN	0	24.4886	24.4886	NaN	NaN	1	NaN	NaN	NaN	NaN	0	NaN	NaN	NaN	NaN	0	NaN	NaN	NaN	NaN	0	NaN	NaN	NaN	NaN	0	NaN	NaN
O43765	Small glutamine-rich tetratricopeptide repeat-containing protein alpha	SGTA	27.5449	27.7115	0.304147	0.0110419	3	28.0277	27.9932	0.923366	0.0329447	3	27.6023	27.6945	0.255358	0.00925134	3	27.0092	27.0092	NaN	NaN	1	27.4713	27.4713	0.222367	0.00809451	2	28.4197	28.4197	NaN	NaN	1	27.7998	27.7998	NaN	NaN	1	27.5086	27.5086	0.594441	0.0216092	2	NaN	NaN	NaN	NaN	0	27.7115	27.9932
O43768	Alpha-endosulfine	ENSA	28.0423	27.9376	0.444776	0.0158609	3	28.2431	27.9333	0.718072	0.0254247	3	27.9204	27.9033	0.439463	0.0157399	3	27.8887	27.7016	0.365966	0.0131224	3	27.6334	27.6241	0.21101	0.00763606	3	27.9974	28.0273	0.601841	0.0214963	3	28.3057	28.0641	0.445142	0.0157262	3	28.0874	27.9861	0.583641	0.0207795	3	28.3477	28.393	0.324597	0.0114506	3	27.9376	27.7319
O43776	Asparagine--tRNA ligase, cytoplasmic	NARS	27.2134	27.2134	NaN	NaN	1	27.321	27.321	NaN	NaN	1	27.9844	27.9844	NaN	NaN	1	NaN	NaN	NaN	NaN	0	27.9724	27.9724	0.466349	0.0166718	2	NaN	NaN	NaN	NaN	0	27.4675	27.4675	0.0795773	0.00289715	2	27.58	27.58	0.0410814	0.00148954	2	28.2085	28.2085	NaN	NaN	1	NaN	NaN
O43795	Unconventional myosin-Ib	MYO1B	27.6221	27.6221	0.500153	0.018107	2	27.8571	27.8571	0.705089	0.025311	2	27.5	27.5	0.323963	0.0117805	2	NaN	NaN	NaN	NaN	0	27.7466	27.7466	0.0423073	0.00152478	2	NaN	NaN	NaN	NaN	0	27.539	27.539	NaN	NaN	1	27.8484	27.8484	NaN	NaN	1	28.0476	28.0664	0.21073	0.0075133	3	27.9758	28.3556
O43805	Sjoegren syndrome nuclear autoantigen 1	SSNA1	25.9996	25.9996	0.0857044	0.00329638	2	NaN	NaN	NaN	NaN	0	NaN	NaN	NaN	NaN	0	NaN	NaN	NaN	NaN	0	NaN	NaN	NaN	NaN	0	NaN	NaN	NaN	NaN	0	NaN	NaN	NaN	NaN	0	NaN	NaN	NaN	NaN	0	NaN	NaN	NaN	NaN	0	25.939	NaN
O43809	Cleavage and polyadenylation specificity factor subunit 5	NUDT21	27.5535	27.6619	0.325975	0.0118306	3	27.7493	27.6934	0.146645	0.00528465	3	27.5671	27.5495	0.0678636	0.00246176	3	27.8237	27.8237	0.217785	0.00782734	2	27.7433	27.7155	0.158893	0.00572727	3	27.7408	27.7091	0.49595	0.017878	3	27.7311	27.7693	0.299517	0.0108008	3	27.5688	27.5311	0.220888	0.00801225	3	27.6557	27.6244	0.125581	0.00454087	3	27.6619	27.6388
O43813	LanC-like protein 1	LANCL1	28.1894	28.1894	NaN	NaN	1	NaN	NaN	NaN	NaN	0	NaN	NaN	NaN	NaN	0	NaN	NaN	NaN	NaN	0	26.9999	26.9999	NaN	NaN	1	26.6353	26.6353	NaN	NaN	1	NaN	NaN	NaN	NaN	0	NaN	NaN	NaN	NaN	0	NaN	NaN	NaN	NaN	0	NaN	NaN
O43823	A-kinase anchor protein 8	AKAP8	NaN	NaN	NaN	NaN	0	25.3915	25.3915	NaN	NaN	1	NaN	NaN	NaN	NaN	0	NaN	NaN	NaN	NaN	0	NaN	NaN	NaN	NaN	0	NaN	NaN	NaN	NaN	0	NaN	NaN	NaN	NaN	0	NaN	NaN	NaN	NaN	0	25.9948	25.9948	NaN	NaN	1	NaN	NaN
O43837	Isocitrate dehydrogenase [NAD] subunit beta, mitochondrial	IDH3B	26.7473	26.7473	0.143953	0.00538197	2	27.3041	27.3041	NaN	NaN	1	26.5489	26.5489	NaN	NaN	1	27.8602	27.8602	NaN	NaN	1	26.613	26.613	0.31504	0.0118378	2	26.5015	26.5015	0.733711	0.0276857	2	27.2223	27.2223	NaN	NaN	1	26.933	26.933	0.675693	0.0250879	2	26.8957	26.8957	NaN	NaN	1	26.8491	NaN
O43847	Nardilysin	NRD1	26.0868	26.0868	0.0734245	0.00281462	2	25.897	25.8961	0.355713	0.0137357	3	26.2964	26.2964	0.310948	0.0118247	2	24.9925	24.9925	NaN	NaN	1	26.2273	26.2273	NaN	NaN	1	26.7824	26.7824	NaN	NaN	1	NaN	NaN	NaN	NaN	0	NaN	NaN	NaN	NaN	0	NaN	NaN	NaN	NaN	0	26.0349	26.2532
O43852	Calumenin	CALU	27.3234	27.3234	0.523952	0.0191759	2	28.1458	28.1458	0.0152511	0.000541859	2	28.3931	28.3012	0.526915	0.0185578	3	28.0064	28.0064	0.0753478	0.00269037	2	27.4649	27.5904	0.286401	0.0104279	3	27.1683	27.13	0.212873	0.00783534	3	27.7671	27.6455	0.289072	0.0104106	3	27.2111	27.334	0.340936	0.0125293	3	26.9076	26.9076	0.0521812	0.00193927	2	NaN	28.1566
O43866	CD5 antigen-like	CD5L	32.3465	32.3465	0.749359	0.0231666	2	33.3231	33.2997	0.554802	0.0166492	3	31.9512	32.0821	0.338151	0.0105834	3	34.2281	34.149	0.275151	0.00803877	3	33.1163	32.9332	0.779418	0.0235358	3	34.3385	34.2621	0.13654	0.00397629	3	34.1639	34.0571	0.5632	0.0164852	3	33.4543	32.9399	1.26013	0.0376674	3	32.7599	33.7888	2.36608	0.0722248	3	32.8764	32.7803
O43913	Origin recognition complex subunit 5	ORC5	25.0063	25.0063	NaN	NaN	1	25.2694	25.2694	NaN	NaN	1	24.7578	24.7578	NaN	NaN	1	NaN	NaN	NaN	NaN	0	24.7237	24.7237	NaN	NaN	1	NaN	NaN	NaN	NaN	0	NaN	NaN	NaN	NaN	0	NaN	NaN	NaN	NaN	0	NaN	NaN	NaN	NaN	0	25.0063	25.2694
O43920	NADH dehydrogenase [ubiquinone] iron-sulfur protein 5	NDUFS5	NaN	NaN	NaN	NaN	0	26.6461	26.6461	0.213368	0.00800748	2	NaN	NaN	NaN	NaN	0	26.7974	26.7974	NaN	NaN	1	NaN	NaN	NaN	NaN	0	NaN	NaN	NaN	NaN	0	NaN	NaN	NaN	NaN	0	NaN	NaN	NaN	NaN	0	NaN	NaN	NaN	NaN	0	NaN	26.797
O60216	Double-strand-break repair protein rad21 homolog	RAD21	25.86	25.86	0.147379	0.00569912	2	26.6587	26.6587	NaN	NaN	1	24.6552	24.6552	1.50621	0.0610911	2	NaN	NaN	NaN	NaN	0	NaN	NaN	NaN	NaN	0	NaN	NaN	NaN	NaN	0	25.3564	25.3564	NaN	NaN	1	25.3604	25.3604	NaN	NaN	1	NaN	NaN	NaN	NaN	0	25.9642	NaN
O60220	Mitochondrial import inner membrane translocase subunit Tim8 A	TIMM8A	NaN	NaN	NaN	NaN	0	NaN	NaN	NaN	NaN	0	26.8471	26.8471	NaN	NaN	1	NaN	NaN	NaN	NaN	0	NaN	NaN	NaN	NaN	0	NaN	NaN	NaN	NaN	0	NaN	NaN	NaN	NaN	0	NaN	NaN	NaN	NaN	0	NaN	NaN	NaN	NaN	0	NaN	NaN
O60262	Guanine nucleotide-binding protein G(I)/G(S)/G(O) subunit gamma-7	GNG7	NaN	NaN	NaN	NaN	0	29.8833	29.8833	NaN	NaN	1	NaN	NaN	NaN	NaN	0	NaN	NaN	NaN	NaN	0	NaN	NaN	NaN	NaN	0	NaN	NaN	NaN	NaN	0	NaN	NaN	NaN	NaN	0	29.8515	29.8515	NaN	NaN	1	NaN	NaN	NaN	NaN	0	NaN	29.8833
O60264	SWI/SNF-related matrix-associated actin-dependent regulator of chromatin subfamily A member 5	SMARCA5	24.6856	24.6856	NaN	NaN	1	NaN	NaN	NaN	NaN	0	NaN	NaN	NaN	NaN	0	NaN	NaN	NaN	NaN	0	NaN	NaN	NaN	NaN	0	NaN	NaN	NaN	NaN	0	26.988	26.988	NaN	NaN	1	NaN	NaN	NaN	NaN	0	NaN	NaN	NaN	NaN	0	NaN	NaN
O60341	Lysine-specific histone demethylase 1A	KDM1A	25.3157	25.3157	NaN	NaN	1	NaN	NaN	NaN	NaN	0	NaN	NaN	NaN	NaN	0	NaN	NaN	NaN	NaN	0	27.2288	27.2288	NaN	NaN	1	27.5165	27.5165	NaN	NaN	1	NaN	NaN	NaN	NaN	0	NaN	NaN	NaN	NaN	0	NaN	NaN	NaN	NaN	0	25.3157	NaN
O60462	Neuropilin-2	NRP2	NaN	NaN	NaN	NaN	0	20.1183	20.1183	NaN	NaN	1	NaN	NaN	NaN	NaN	0	NaN	NaN	NaN	NaN	0	NaN	NaN	NaN	NaN	0	NaN	NaN	NaN	NaN	0	NaN	NaN	NaN	NaN	0	NaN	NaN	NaN	NaN	0	NaN	NaN	NaN	NaN	0	NaN	NaN
O60488	Long-chain-fatty-acid--CoA ligase 4	ACSL4	NaN	NaN	NaN	NaN	0	NaN	NaN	NaN	NaN	0	NaN	NaN	NaN	NaN	0	NaN	NaN	NaN	NaN	0	NaN	NaN	NaN	NaN	0	24.2348	24.2348	NaN	NaN	1	NaN	NaN	NaN	NaN	0	NaN	NaN	NaN	NaN	0	NaN	NaN	NaN	NaN	0	NaN	NaN
O60493	Sorting nexin-3	SNX3	NaN	NaN	NaN	NaN	0	NaN	NaN	NaN	NaN	0	NaN	NaN	NaN	NaN	0	NaN	NaN	NaN	NaN	0	27.4224	27.4224	NaN	NaN	1	NaN	NaN	NaN	NaN	0	28.9058	28.9058	NaN	NaN	1	30.1925	30.1925	NaN	NaN	1	27.0437	27.0437	NaN	NaN	1	NaN	NaN
O60502	Protein O-GlcNAcase	MGEA5	NaN	NaN	NaN	NaN	0	26.2851	26.2851	NaN	NaN	1	NaN	NaN	NaN	NaN	0	NaN	NaN	NaN	NaN	0	NaN	NaN	NaN	NaN	0	NaN	NaN	NaN	NaN	0	NaN	NaN	NaN	NaN	0	NaN	NaN	NaN	NaN	0	NaN	NaN	NaN	NaN	0	NaN	NaN
O60506	Heterogeneous nuclear ribonucleoprotein Q	SYNCRIP	29.4098	29.7002	0.662113	0.0225133	3	30.0717	30.0411	0.244788	0.00814013	3	30.1405	30.1364	0.120724	0.00400537	3	29.2421	29.3456	0.601826	0.0205808	3	29.2414	29.0309	0.706385	0.024157	3	29.6021	29.7336	0.360088	0.0121643	3	29.3366	29.3366	0.218957	0.00746362	2	28.5202	29.3306	1.72635	0.0605309	3	28.4807	28.9003	1.23821	0.0434754	3	29.8771	30.0411
O60508	Pre-mRNA-processing factor 17	CDC40	NaN	NaN	NaN	NaN	0	NaN	NaN	NaN	NaN	0	27.0182	27.0182	NaN	NaN	1	NaN	NaN	NaN	NaN	0	24.6691	24.6691	NaN	NaN	1	NaN	NaN	NaN	NaN	0	NaN	NaN	NaN	NaN	0	NaN	NaN	NaN	NaN	0	NaN	NaN	NaN	NaN	0	NaN	NaN
O60518	Ran-binding protein 6	RANBP6	28.1608	28.1608	NaN	NaN	1	26.5046	26.5046	NaN	NaN	1	27.5579	27.5579	0.100071	0.00363129	2	NaN	NaN	NaN	NaN	0	27.2423	27.2423	NaN	NaN	1	26.661	26.661	0.33226	0.0124624	2	NaN	NaN	NaN	NaN	0	25.9592	25.9592	NaN	NaN	1	NaN	NaN	NaN	NaN	0	NaN	NaN
O60547	GDP-mannose 4,6 dehydratase	GMDS	NaN	NaN	NaN	NaN	0	NaN	NaN	NaN	NaN	0	NaN	NaN	NaN	NaN	0	NaN	NaN	NaN	NaN	0	NaN	NaN	NaN	NaN	0	NaN	NaN	NaN	NaN	0	26.3847	26.3847	NaN	NaN	1	24.8439	24.8439	NaN	NaN	1	NaN	NaN	NaN	NaN	0	NaN	NaN
O60573	Eukaryotic translation initiation factor 4E type 2	EIF4E2	NaN	NaN	NaN	NaN	0	NaN	NaN	NaN	NaN	0	NaN	NaN	NaN	NaN	0	NaN	NaN	NaN	NaN	0	26.7016	26.7016	NaN	NaN	1	27.345	27.345	NaN	NaN	1	27.8284	27.8284	NaN	NaN	1	NaN	NaN	NaN	NaN	0	27.3406	26.9336	1.0309	0.0377059	3	NaN	NaN
O60610	Protein diaphanous homolog 1	DIAPH1	26.3894	26.3894	NaN	NaN	1	27.6593	27.6593	0.146279	0.00528859	2	26.4432	26.4432	0.271685	0.0102743	2	NaN	NaN	NaN	NaN	0	25.6645	25.6645	NaN	NaN	1	26.7756	26.7756	0.654882	0.0244582	2	NaN	NaN	NaN	NaN	0	26.9321	26.9321	NaN	NaN	1	NaN	NaN	NaN	NaN	0	NaN	NaN
O60613	15 kDa selenoprotein	SELENOF	25.9911	25.9911	NaN	NaN	1	NaN	NaN	NaN	NaN	0	26.2114	26.2114	NaN	NaN	1	NaN	NaN	NaN	NaN	0	26.9018	26.9018	NaN	NaN	1	NaN	NaN	NaN	NaN	0	NaN	NaN	NaN	NaN	0	NaN	NaN	NaN	NaN	0	NaN	NaN	NaN	NaN	0	NaN	NaN
O60664	Perilipin-3	PLIN3	28.1819	28.4847	0.966535	0.0342963	3	28.6179	28.3583	0.614468	0.0214714	3	28.7409	28.8982	0.353901	0.0123135	3	28.9872	29.0259	0.217531	0.00750438	3	29.0425	29.0034	0.253756	0.00873739	3	28.4181	28.6008	0.80891	0.0284646	3	28.8018	29.3674	1.20171	0.0417234	3	28.8945	28.9315	0.241638	0.00836276	3	29.2926	29.3986	0.405789	0.0138529	3	27.1002	28.3583
O60684	Importin subunit alpha-7	KPNA6	25.6073	25.6073	0.204947	0.00800345	2	NaN	NaN	NaN	NaN	0	NaN	NaN	NaN	NaN	0	NaN	NaN	NaN	NaN	0	NaN	NaN	NaN	NaN	0	NaN	NaN	NaN	NaN	0	NaN	NaN	NaN	NaN	0	NaN	NaN	NaN	NaN	0	NaN	NaN	NaN	NaN	0	25.4624	NaN
O60701	UDP-glucose 6-dehydrogenase	UGDH	27.9733	27.9733	NaN	NaN	1	NaN	NaN	NaN	NaN	0	27.4686	27.4686	0.135134	0.0049196	2	28.5746	28.5746	NaN	NaN	1	27.4075	27.4075	0.0272194	0.00099314	2	27.2432	27.2432	NaN	NaN	1	27.6995	27.965	0.636279	0.0229708	3	27.2775	27.2775	0.401854	0.0147321	2	27.7503	27.7503	0.337391	0.0121581	2	NaN	NaN
O60716	Catenin delta-1	CTNND1	26.413	26.413	0.28049	0.0106194	2	26.7961	26.7961	0.145989	0.00544813	2	26.3183	26.2823	0.477074	0.0181271	3	26.613	26.613	NaN	NaN	1	26.1636	26.1636	0.498691	0.0190605	2	26.4796	26.4796	NaN	NaN	1	NaN	NaN	NaN	NaN	0	NaN	NaN	NaN	NaN	0	25.8629	25.8629	NaN	NaN	1	26.2147	26.6929
O60749	Sorting nexin-2	SNX2	27.7588	27.7035	0.747577	0.0269312	3	27.5144	27.5144	0.117584	0.00427353	2	27.278	27.135	0.272331	0.00998355	3	NaN	NaN	NaN	NaN	0	27.7264	27.7264	0.45637	0.0164598	2	27.9471	27.9471	0.621332	0.0222324	2	27.2937	27.2937	NaN	NaN	1	27.8869	27.8869	NaN	NaN	1	27.2986	27.2986	NaN	NaN	1	28.5325	27.5975
O60762	Dolichol-phosphate mannosyltransferase subunit 1	DPM1	NaN	NaN	NaN	NaN	0	NaN	NaN	NaN	NaN	0	NaN	NaN	NaN	NaN	0	26.3969	26.3969	0.451194	0.0170927	2	27.4301	27.4301	0.22205	0.00809511	2	25.7194	25.7194	NaN	NaN	1	27.3128	27.3128	0.182285	0.00667396	2	26.9318	26.9496	0.407163	0.0151183	3	27.0259	27.0259	0.339678	0.0125686	2	NaN	NaN
O60763	General vesicular transport factor p115	USO1	27.1833	27.1833	0.569761	0.0209599	2	27.7086	27.7086	0.63135	0.0227854	2	27.0535	27.0535	0.463859	0.017146	2	26.574	26.574	0.288971	0.0108742	2	27.1505	26.9828	0.440692	0.0162314	3	28.1039	28.1039	0.507637	0.0180629	2	NaN	NaN	NaN	NaN	0	27.1674	27.1674	0.601582	0.0221435	2	NaN	NaN	NaN	NaN	0	26.7804	27.2621
O60784	Target of Myb protein 1	TOM1	24.7747	24.7747	NaN	NaN	1	NaN	NaN	NaN	NaN	0	NaN	NaN	NaN	NaN	0	NaN	NaN	NaN	NaN	0	NaN	NaN	NaN	NaN	0	NaN	NaN	NaN	NaN	0	NaN	NaN	NaN	NaN	0	NaN	NaN	NaN	NaN	0	NaN	NaN	NaN	NaN	0	NaN	NaN
O60832	H/ACA ribonucleoprotein complex subunit 4	DKC1	NaN	NaN	NaN	NaN	0	26.0158	26.0158	NaN	NaN	1	26.1148	26.1148	NaN	NaN	1	25.7625	25.7625	0.245767	0.00953969	2	25.7125	25.7125	0.103819	0.00403768	2	26.6587	26.6587	0.982959	0.036872	2	26.8225	26.8225	NaN	NaN	1	26.9538	26.9538	0.0851231	0.00315811	2	26.107	26.107	0.027353	0.00104773	2	NaN	NaN
O60841	Eukaryotic translation initiation factor 5B	EIF5B	26.504	26.504	0.135424	0.00510958	2	27.8452	27.8452	NaN	NaN	1	27.792	27.792	0.33154	0.0119293	2	26.5802	26.5802	NaN	NaN	1	26.6775	26.6775	0.0952991	0.00357227	2	26.3837	26.3837	0.0650383	0.0024651	2	NaN	NaN	NaN	NaN	0	26.3407	26.3407	NaN	NaN	1	29.7968	29.7968	NaN	NaN	1	26.5997	NaN
O60884	DnaJ homolog subfamily A member 2	DNAJA2	27.4745	27.4745	0.569935	0.0207441	2	27.3498	27.3498	NaN	NaN	1	27.2326	27.2296	0.926084	0.0340065	3	27.1762	27.1762	0.657646	0.0241993	2	27.592	27.7551	0.704266	0.0255243	3	NaN	NaN	NaN	NaN	0	28.5418	28.5418	1.46156	0.0512078	2	27.6844	27.6336	0.10934	0.00394954	3	28.6663	28.6663	NaN	NaN	1	27.8775	27.3498
O60925	Prefoldin subunit 1	PFDN1	29.4768	29.4768	NaN	NaN	1	29.0158	29.0158	NaN	NaN	1	29.5937	29.5937	NaN	NaN	1	NaN	NaN	NaN	NaN	0	30.5693	30.5693	0.854622	0.0279569	2	31.0865	31.0865	NaN	NaN	1	30.8167	30.8167	NaN	NaN	1	29.4426	29.4426	NaN	NaN	1	30.5779	30.5779	0.0874888	0.00286117	2	29.4768	NaN
O60942	mRNA-capping enzyme;Polynucleotide 5-triphosphatase;mRNA guanylyltransferase	RNGTT	NaN	NaN	NaN	NaN	0	NaN	NaN	NaN	NaN	0	NaN	NaN	NaN	NaN	0	22.6542	22.6542	NaN	NaN	1	NaN	NaN	NaN	NaN	0	NaN	NaN	NaN	NaN	0	NaN	NaN	NaN	NaN	0	NaN	NaN	NaN	NaN	0	NaN	NaN	NaN	NaN	0	NaN	NaN
O75083	WD repeat-containing protein 1	WDR1	28.7193	28.5511	0.30182	0.0105093	3	28.4328	28.4966	0.196834	0.00692278	3	28.3724	28.5113	0.59254	0.0208843	3	28.7219	28.7887	0.178424	0.00621212	3	29.2066	29.1102	0.389063	0.0133211	3	29.0353	28.9802	0.23575	0.00811942	3	28.1845	27.7847	1.06353	0.0377345	3	29.1106	28.7918	0.570647	0.0196027	3	29.1011	29.0074	0.291273	0.010009	3	29.0678	28.5899
O75122	CLIP-associating protein 2	CLASP2	NaN	NaN	NaN	NaN	0	23.868	23.868	NaN	NaN	1	NaN	NaN	NaN	NaN	0	NaN	NaN	NaN	NaN	0	NaN	NaN	NaN	NaN	0	NaN	NaN	NaN	NaN	0	NaN	NaN	NaN	NaN	0	NaN	NaN	NaN	NaN	0	NaN	NaN	NaN	NaN	0	NaN	23.868
O75131	Copine-3	CPNE3	NaN	NaN	NaN	NaN	0	28.587	28.587	NaN	NaN	1	28.392	28.392	0.186162	0.00655685	2	27.9283	27.9283	0.466321	0.016697	2	28.265	28.265	0.188228	0.00665943	2	27.3914	27.3914	NaN	NaN	1	28.3823	28.3526	0.181865	0.00640769	3	28.0512	28.1625	0.256841	0.00915613	3	28.4336	28.4336	NaN	NaN	1	NaN	28.587
O75150	E3 ubiquitin-protein ligase BRE1B	RNF40	NaN	NaN	NaN	NaN	0	33.1704	33.1704	1.60516	0.0483914	2	33.6055	33.6055	NaN	NaN	1	33.9654	33.9654	NaN	NaN	1	33.3985	33.3985	NaN	NaN	1	34.0335	34.0335	NaN	NaN	1	33.7333	34.0135	0.688931	0.0204229	3	33.5868	33.5868	1.19617	0.0356144	2	33.8484	33.8484	0.208406	0.00615706	2	NaN	NaN
O75153	Clustered mitochondria protein homolog	CLUH	NaN	NaN	NaN	NaN	0	NaN	NaN	NaN	NaN	0	NaN	NaN	NaN	NaN	0	NaN	NaN	NaN	NaN	0	NaN	NaN	NaN	NaN	0	NaN	NaN	NaN	NaN	0	NaN	NaN	NaN	NaN	0	NaN	NaN	NaN	NaN	0	26.2942	26.2942	NaN	NaN	1	NaN	NaN
O75155	Cullin-associated NEDD8-dissociated protein 2	CAND2	NaN	NaN	NaN	NaN	0	NaN	NaN	NaN	NaN	0	25.6051	25.6051	NaN	NaN	1	NaN	NaN	NaN	NaN	0	27.5621	27.5621	NaN	NaN	1	NaN	NaN	NaN	NaN	0	NaN	NaN	NaN	NaN	0	NaN	NaN	NaN	NaN	0	NaN	NaN	NaN	NaN	0	NaN	NaN
O75165	DnaJ homolog subfamily C member 13	DNAJC13	24.4774	24.4774	NaN	NaN	1	22.5053	22.5053	NaN	NaN	1	24.4019	24.4019	NaN	NaN	1	NaN	NaN	NaN	NaN	0	NaN	NaN	NaN	NaN	0	NaN	NaN	NaN	NaN	0	NaN	NaN	NaN	NaN	0	NaN	NaN	NaN	NaN	0	NaN	NaN	NaN	NaN	0	NaN	NaN
O75175	CCR4-NOT transcription complex subunit 3	CNOT3	NaN	NaN	NaN	NaN	0	27.7945	27.7945	NaN	NaN	1	NaN	NaN	NaN	NaN	0	NaN	NaN	NaN	NaN	0	NaN	NaN	NaN	NaN	0	NaN	NaN	NaN	NaN	0	NaN	NaN	NaN	NaN	0	NaN	NaN	NaN	NaN	0	NaN	NaN	NaN	NaN	0	NaN	NaN
O75191	Xylulose kinase	XYLB	NaN	NaN	NaN	NaN	0	27.3058	27.3058	NaN	NaN	1	NaN	NaN	NaN	NaN	0	NaN	NaN	NaN	NaN	0	NaN	NaN	NaN	NaN	0	NaN	NaN	NaN	NaN	0	NaN	NaN	NaN	NaN	0	NaN	NaN	NaN	NaN	0	NaN	NaN	NaN	NaN	0	NaN	27.3058
O75223	Gamma-glutamylcyclotransferase	GGCT	27.7788	27.7788	NaN	NaN	1	27.5101	27.5101	NaN	NaN	1	27.7869	27.7869	0.226534	0.00815255	2	NaN	NaN	NaN	NaN	0	27.1978	27.1978	NaN	NaN	1	26.7483	26.7483	0.889949	0.0332712	2	NaN	NaN	NaN	NaN	0	NaN	NaN	NaN	NaN	0	27.5694	27.5694	0.511393	0.0185493	2	NaN	NaN
O75251	NADH dehydrogenase [ubiquinone] iron-sulfur protein 7, mitochondrial	NDUFS7	NaN	NaN	NaN	NaN	0	NaN	NaN	NaN	NaN	0	NaN	NaN	NaN	NaN	0	28.9203	28.9203	NaN	NaN	1	NaN	NaN	NaN	NaN	0	29.2928	29.2928	NaN	NaN	1	NaN	NaN	NaN	NaN	0	26.6508	26.6508	NaN	NaN	1	27.3584	27.3584	NaN	NaN	1	NaN	NaN
O75306	NADH dehydrogenase [ubiquinone] iron-sulfur protein 2, mitochondrial	NDUFS2	NaN	NaN	NaN	NaN	0	NaN	NaN	NaN	NaN	0	NaN	NaN	NaN	NaN	0	NaN	NaN	NaN	NaN	0	NaN	NaN	NaN	NaN	0	27.5498	27.5498	NaN	NaN	1	NaN	NaN	NaN	NaN	0	NaN	NaN	NaN	NaN	0	26.7737	26.7737	NaN	NaN	1	NaN	NaN
O75312	Zinc finger protein ZPR1	ZPR1	26.5412	26.5412	0.17093	0.00644018	2	26.8459	26.8459	NaN	NaN	1	25.9455	25.9066	0.550192	0.0212057	3	26.463	26.2349	0.404974	0.0153034	3	25.8791	25.8791	NaN	NaN	1	27.2265	27.2265	NaN	NaN	1	26.9021	26.9021	NaN	NaN	1	NaN	NaN	NaN	NaN	0	24.9405	24.9405	NaN	NaN	1	26.6621	26.8459
O75323	Protein NipSnap homolog 2	GBAS	29.9649	29.9649	NaN	NaN	1	NaN	NaN	NaN	NaN	0	29.0131	29.0131	NaN	NaN	1	NaN	NaN	NaN	NaN	0	29.6276	29.6276	NaN	NaN	1	NaN	NaN	NaN	NaN	0	28.0376	28.0376	NaN	NaN	1	NaN	NaN	NaN	NaN	0	NaN	NaN	NaN	NaN	0	29.9649	NaN
O75340	Programmed cell death protein 6	PDCD6	27.0741	27.0741	NaN	NaN	1	27.5323	27.5323	NaN	NaN	1	26.8932	26.8932	0.226337	0.00841617	2	NaN	NaN	NaN	NaN	0	26.8791	26.8791	NaN	NaN	1	NaN	NaN	NaN	NaN	0	26.5436	26.5436	NaN	NaN	1	27.3418	27.3418	0.10898	0.00398585	2	27.6226	27.6226	0.18138	0.00656636	2	27.0741	27.5323
O75347	Tubulin-specific chaperone A	TBCA	29.1718	29.216	0.351621	0.0120535	3	29.2503	29.2503	0.115008	0.00393185	2	29.0558	29.0666	0.485155	0.0166974	3	28.8515	28.9103	0.256428	0.00888785	3	28.5151	28.7366	0.423408	0.0148485	3	28.5978	28.5978	0.699187	0.024449	2	29.336	29.336	0.422131	0.0143895	2	NaN	NaN	NaN	NaN	0	28.6386	28.6386	0.301065	0.0105126	2	29.216	29.3316
O75348	V-type proton ATPase subunit G 1	ATP6V1G1	28.0418	28.0418	0.323049	0.0115203	2	28.6591	28.6591	NaN	NaN	1	28.2431	28.2431	NaN	NaN	1	NaN	NaN	NaN	NaN	0	NaN	NaN	NaN	NaN	0	NaN	NaN	NaN	NaN	0	27.596	27.596	0.178639	0.00647338	2	NaN	NaN	NaN	NaN	0	NaN	NaN	NaN	NaN	0	28.2702	NaN
O75351	Vacuolar protein sorting-associated protein 4B	VPS4B	27.255	27.4236	0.551867	0.0202483	3	26.5896	26.5896	NaN	NaN	1	27.5377	27.5377	0.518449	0.0188269	2	27.374	27.374	0.240844	0.00879828	2	27.7971	27.7971	0.266454	0.00958568	2	26.2253	26.2253	NaN	NaN	1	28.2854	28.2854	NaN	NaN	1	27.1733	27.1733	0.880411	0.0323998	2	27.3582	27.3582	NaN	NaN	1	26.6385	26.5896
O75356	Ectonucleoside triphosphate diphosphohydrolase 5	ENTPD5	NaN	NaN	NaN	NaN	0	23.7713	23.7713	NaN	NaN	1	NaN	NaN	NaN	NaN	0	NaN	NaN	NaN	NaN	0	NaN	NaN	NaN	NaN	0	NaN	NaN	NaN	NaN	0	NaN	NaN	NaN	NaN	0	NaN	NaN	NaN	NaN	0	NaN	NaN	NaN	NaN	0	NaN	NaN
O75367	Core histone macro-H2A.1	H2AFY	NaN	NaN	NaN	NaN	0	27.2072	27.2072	1.49516	0.0549545	2	27.1237	27.1109	0.443588	0.0163542	3	NaN	NaN	NaN	NaN	0	27.3973	27.3973	NaN	NaN	1	27.8397	27.8397	0.126051	0.00452773	2	NaN	NaN	NaN	NaN	0	27.9238	27.9238	1.30915	0.046883	2	27.5493	27.5493	NaN	NaN	1	NaN	26.15
O75368	SH3 domain-binding glutamic acid-rich-like protein	SH3BGRL	NaN	NaN	NaN	NaN	0	NaN	NaN	NaN	NaN	0	NaN	NaN	NaN	NaN	0	NaN	NaN	NaN	NaN	0	NaN	NaN	NaN	NaN	0	NaN	NaN	NaN	NaN	0	NaN	NaN	NaN	NaN	0	26.0982	26.0982	NaN	NaN	1	25.8634	25.8634	NaN	NaN	1	NaN	NaN
O75369	Filamin-B	FLNB	28.5044	28.5066	0.075328	0.00264268	3	28.2279	28.1461	0.274412	0.00972131	3	28.6235	28.684	0.162525	0.00567802	3	28.1814	27.9685	0.816438	0.0289708	3	28.637	28.6344	0.144846	0.00505799	3	28.1164	28.3431	0.753611	0.0268033	3	28.3936	28.3936	0.768447	0.0270641	2	27.8817	27.8661	0.464587	0.0166628	3	27.1187	26.4523	1.57352	0.0580233	3	28.428	28.0037
O75380	NADH dehydrogenase [ubiquinone] iron-sulfur protein 6, mitochondrial	NDUFS6	23.1504	23.1504	NaN	NaN	1	NaN	NaN	NaN	NaN	0	24.7986	24.7986	NaN	NaN	1	24.4737	24.4737	NaN	NaN	1	24.2487	24.2487	NaN	NaN	1	23.8186	23.8186	0.00779144	0.000327115	2	25.2571	25.2571	1.68336	0.0666492	2	24.3744	24.3744	0.497921	0.020428	2	24.6514	24.6514	NaN	NaN	1	23.1504	NaN
O75381	Peroxisomal membrane protein PEX14	PEX14	NaN	NaN	NaN	NaN	0	23.5114	23.5114	NaN	NaN	1	NaN	NaN	NaN	NaN	0	NaN	NaN	NaN	NaN	0	NaN	NaN	NaN	NaN	0	22.6387	22.6387	NaN	NaN	1	NaN	NaN	NaN	NaN	0	NaN	NaN	NaN	NaN	0	NaN	NaN	NaN	NaN	0	NaN	NaN
O75390	Citrate synthase, mitochondrial	CS	28.5152	28.8533	0.617445	0.0216532	3	28.4108	28.488	0.915322	0.0322174	3	28.1268	28.1174	0.224449	0.0079799	3	28.2274	28.2806	0.735573	0.0260588	3	28.7407	28.7137	0.69511	0.0241856	3	29.0712	28.996	0.226325	0.00778521	3	27.1726	27.3551	0.403933	0.0148655	3	28.3154	28.1495	0.317739	0.0112214	3	28.7821	28.7821	NaN	NaN	1	28.8897	27.4594
O75391	Sperm-associated antigen 7	SPAG7	NaN	NaN	NaN	NaN	0	NaN	NaN	NaN	NaN	0	25.0796	25.0796	NaN	NaN	1	NaN	NaN	NaN	NaN	0	NaN	NaN	NaN	NaN	0	NaN	NaN	NaN	NaN	0	NaN	NaN	NaN	NaN	0	NaN	NaN	NaN	NaN	0	NaN	NaN	NaN	NaN	0	NaN	NaN
O75394	39S ribosomal protein L33, mitochondrial	MRPL33	NaN	NaN	NaN	NaN	0	24.8388	24.8388	NaN	NaN	1	NaN	NaN	NaN	NaN	0	NaN	NaN	NaN	NaN	0	NaN	NaN	NaN	NaN	0	25.8863	25.8863	NaN	NaN	1	25.8714	25.8714	NaN	NaN	1	NaN	NaN	NaN	NaN	0	NaN	NaN	NaN	NaN	0	NaN	24.8388
O75400	Pre-mRNA-processing factor 40 homolog A	PRPF40A	27.6813	27.5931	0.440548	0.015915	3	27.5785	27.5785	NaN	NaN	1	27.64	27.9027	0.474878	0.0171808	3	27.6993	27.8136	0.31283	0.0112938	3	27.4814	27.4814	0.0189991	0.000691344	2	27.9901	27.9901	0.559641	0.0199942	2	27.101	27.101	0.204884	0.00755999	2	27.7021	27.7785	0.1489	0.00537505	3	27.8121	27.5903	0.389315	0.013998	3	27.5931	27.5785
O75436	Vacuolar protein sorting-associated protein 26A	VPS26A	27.9505	27.9505	0.844245	0.030205	2	27.2979	27.2979	0.24424	0.00894719	2	27.6614	27.6614	0.498282	0.0180136	2	NaN	NaN	NaN	NaN	0	NaN	NaN	NaN	NaN	0	NaN	NaN	NaN	NaN	0	27.6008	27.6008	NaN	NaN	1	26.8278	26.8278	NaN	NaN	1	NaN	NaN	NaN	NaN	0	28.5475	27.1252
O75438	NADH dehydrogenase [ubiquinone] 1 beta subcomplex subunit 1	NDUFB1	NaN	NaN	NaN	NaN	0	27.1675	27.1675	NaN	NaN	1	NaN	NaN	NaN	NaN	0	NaN	NaN	NaN	NaN	0	NaN	NaN	NaN	NaN	0	NaN	NaN	NaN	NaN	0	NaN	NaN	NaN	NaN	0	NaN	NaN	NaN	NaN	0	NaN	NaN	NaN	NaN	0	NaN	NaN
O75439	Mitochondrial-processing peptidase subunit beta	PMPCB	26.691	26.691	NaN	NaN	1	27.3472	27.3472	NaN	NaN	1	26.734	26.734	0.278918	0.0104331	2	27.4701	27.4701	NaN	NaN	1	26.9139	26.9139	NaN	NaN	1	26.6411	26.7591	0.487775	0.0183091	3	26.9506	26.9506	0.476621	0.017685	2	26.7352	26.7511	0.305787	0.0114376	3	26.7582	26.7582	NaN	NaN	1	NaN	NaN
O75448	Mediator of RNA polymerase II transcription subunit 24	MED24	26.9584	26.9584	NaN	NaN	1	NaN	NaN	NaN	NaN	0	31.2808	31.4599	0.56668	0.0181159	3	32.2366	32.2366	NaN	NaN	1	31.3758	31.3758	0.143759	0.00458185	2	32.578	32.578	NaN	NaN	1	32.4746	32.4746	NaN	NaN	1	31.1625	31.1625	NaN	NaN	1	NaN	NaN	NaN	NaN	0	NaN	NaN
O75475	PC4 and SFRS1-interacting protein	PSIP1	27.5267	27.4124	0.331667	0.0120489	3	27.4816	27.4816	NaN	NaN	1	27.3976	27.3861	0.14077	0.00513802	3	NaN	NaN	NaN	NaN	0	26.8757	26.8757	NaN	NaN	1	NaN	NaN	NaN	NaN	0	27.1726	27.1726	NaN	NaN	1	NaN	NaN	NaN	NaN	0	NaN	NaN	NaN	NaN	0	27.9004	27.4816
O75477	Erlin-1	ERLIN1	26.5373	26.5373	NaN	NaN	1	NaN	NaN	NaN	NaN	0	NaN	NaN	NaN	NaN	0	26.6086	26.6086	0.481258	0.0180865	2	26.5618	26.5618	0.263559	0.00992247	2	26.2678	26.2678	NaN	NaN	1	NaN	NaN	NaN	NaN	0	NaN	NaN	NaN	NaN	0	26.4754	26.4754	NaN	NaN	1	NaN	NaN
O75489	NADH dehydrogenase [ubiquinone] iron-sulfur protein 3, mitochondrial	NDUFS3	NaN	NaN	NaN	NaN	0	NaN	NaN	NaN	NaN	0	23.7068	23.7068	NaN	NaN	1	NaN	NaN	NaN	NaN	0	NaN	NaN	NaN	NaN	0	NaN	NaN	NaN	NaN	0	NaN	NaN	NaN	NaN	0	NaN	NaN	NaN	NaN	0	NaN	NaN	NaN	NaN	0	NaN	NaN
O75503	Ceroid-lipofuscinosis neuronal protein 5	CLN5	NaN	NaN	NaN	NaN	0	28.8201	28.8201	0.362281	0.0125704	2	28.7511	28.7511	NaN	NaN	1	29.4702	29.7643	0.535645	0.0181758	3	29.4415	29.4415	NaN	NaN	1	29.9854	29.9854	NaN	NaN	1	29.738	29.738	0.140922	0.00473877	2	29.7594	29.8404	0.155339	0.00521983	3	29.8635	29.8635	0.0984658	0.0032972	2	NaN	29.0763
O75506	Heat shock factor-binding protein 1	HSBP1	NaN	NaN	NaN	NaN	0	NaN	NaN	NaN	NaN	0	26.3017	26.3017	0.379241	0.0144189	2	NaN	NaN	NaN	NaN	0	NaN	NaN	NaN	NaN	0	29.0557	29.0557	NaN	NaN	1	NaN	NaN	NaN	NaN	0	NaN	NaN	NaN	NaN	0	NaN	NaN	NaN	NaN	0	NaN	NaN
O75521	Enoyl-CoA delta isomerase 2, mitochondrial	ECI2	24.9087	24.9087	NaN	NaN	1	NaN	NaN	NaN	NaN	0	24.0237	24.0237	0.611894	0.0254704	2	23.8821	23.8821	NaN	NaN	1	25.1056	25.1056	NaN	NaN	1	NaN	NaN	NaN	NaN	0	NaN	NaN	NaN	NaN	0	NaN	NaN	NaN	NaN	0	NaN	NaN	NaN	NaN	0	NaN	NaN
O75525	KH domain-containing, RNA-binding, signal transduction-associated protein 3	KHDRBS3	28.8922	28.8922	NaN	NaN	1	NaN	NaN	NaN	NaN	0	NaN	NaN	NaN	NaN	0	29.3373	29.4733	0.443859	0.0151295	3	28.7973	28.7973	0.980933	0.0340633	2	28.1853	28.2472	1.01127	0.0358794	3	28.6334	28.6334	NaN	NaN	1	28.7513	28.7513	0.77411	0.0269243	2	28.8066	28.8066	0.723239	0.0251067	2	28.8922	NaN
O75530	Polycomb protein EED	EED	25.1234	25.1234	NaN	NaN	1	25.4177	25.4177	NaN	NaN	1	25.2877	25.2877	0.0271965	0.00107548	2	NaN	NaN	NaN	NaN	0	25.7946	25.7946	NaN	NaN	1	NaN	NaN	NaN	NaN	0	NaN	NaN	NaN	NaN	0	NaN	NaN	NaN	NaN	0	NaN	NaN	NaN	NaN	0	NaN	25.4177
O75531	Barrier-to-autointegration factor;Barrier-to-autointegration factor, N-terminally processed	BANF1	28.0599	28.5777	1.21179	0.043186	3	28.8183	28.8183	0.297071	0.0103084	2	28.667	28.667	0.440188	0.0153552	2	28.1676	28.1072	0.152822	0.00542544	3	28.458	28.458	0.983749	0.0345684	2	28.0066	28.0066	0.207812	0.00742008	2	28.1193	28.1189	0.109087	0.00387943	3	28.314	28.2495	0.225136	0.0079514	3	NaN	NaN	NaN	NaN	0	28.5777	28.6083
O75533	Splicing factor 3B subunit 1	SF3B1	27.6172	27.7055	0.189592	0.00686499	3	27.8632	27.8632	0.577141	0.0207133	2	27.4956	27.6523	0.455528	0.0165673	3	28.3035	28.3035	NaN	NaN	1	26.9614	26.9614	1.67472	0.0621155	2	26.82	26.82	0.457626	0.0170629	2	27.1258	27.1258	NaN	NaN	1	28.1666	28.2808	0.322702	0.0114569	3	28.4314	28.4314	NaN	NaN	1	27.3996	27.4551
O75534	Cold shock domain-containing protein E1	CSDE1	27.2417	27.2417	0.524848	0.0192663	2	27.391	27.391	0.429674	0.0156867	2	27.5145	27.5974	0.15059	0.00547312	3	27.6907	27.6907	NaN	NaN	1	28.0154	28.0154	0.382302	0.0136462	2	27.3812	27.3207	0.210417	0.00768472	3	NaN	NaN	NaN	NaN	0	27.121	27.121	0.264143	0.0097394	2	NaN	NaN	NaN	NaN	0	26.8706	27.0872
O75607	Nucleoplasmin-3	NPM3	NaN	NaN	NaN	NaN	0	NaN	NaN	NaN	NaN	0	NaN	NaN	NaN	NaN	0	NaN	NaN	NaN	NaN	0	NaN	NaN	NaN	NaN	0	NaN	NaN	NaN	NaN	0	25.2071	25.2071	NaN	NaN	1	NaN	NaN	NaN	NaN	0	25.4945	25.4945	0.20258	0.00794602	2	NaN	NaN
O75636	Ficolin-3	FCN3	31.3788	31.4367	0.759128	0.0241924	3	32.123	31.7891	0.583725	0.0181716	3	31.1438	31.1366	0.306648	0.0098462	3	31.1023	31.1308	0.368191	0.0118381	3	31.2352	31.1859	0.284083	0.00909495	3	31.5788	31.7141	0.32154	0.0101822	3	31.9697	31.5826	0.871123	0.0272484	3	31.4921	31.46	0.1958	0.00621744	3	31.6484	31.4845	1.01404	0.0320409	3	31.4367	32.797
O75643	U5 small nuclear ribonucleoprotein 200 kDa helicase	SNRNP200	28.8684	28.8662	0.358458	0.012417	3	28.1561	28.5185	0.713479	0.0253401	3	28.9409	29.2142	0.5526	0.019094	3	28.4605	28.7417	0.550618	0.0193467	3	28.5806	28.5587	0.0405366	0.00141832	3	28.5807	28.6677	0.263415	0.00921653	3	28.0996	28.0996	0.716513	0.0254991	2	28.2403	27.8122	0.765634	0.0271114	3	29.0402	28.6849	1.06717	0.0367481	3	28.5111	28.5185
O75663	TIP41-like protein	TIPRL	NaN	NaN	NaN	NaN	0	NaN	NaN	NaN	NaN	0	NaN	NaN	NaN	NaN	0	NaN	NaN	NaN	NaN	0	NaN	NaN	NaN	NaN	0	NaN	NaN	NaN	NaN	0	25.8733	25.8733	NaN	NaN	1	26.1807	26.1807	NaN	NaN	1	NaN	NaN	NaN	NaN	0	NaN	NaN
O75694	Nuclear pore complex protein Nup155	NUP155	26.8333	26.8333	0.304213	0.0113371	2	26.3936	26.3936	NaN	NaN	1	26.4651	26.3759	0.178766	0.00675478	3	26.9802	26.9802	NaN	NaN	1	26.5801	26.5801	0.478531	0.0180034	2	26.75	26.75	0.0257588	0.000962945	2	26.5448	26.5448	0.103781	0.00390965	2	26.6351	26.6351	NaN	NaN	1	26.6148	26.6148	NaN	NaN	1	27.0484	NaN
O75717	WD repeat and HMG-box DNA-binding protein 1	WDHD1	NaN	NaN	NaN	NaN	0	26.3635	26.3635	NaN	NaN	1	25.6182	25.6182	NaN	NaN	1	NaN	NaN	NaN	NaN	0	NaN	NaN	NaN	NaN	0	27.0444	27.0444	NaN	NaN	1	NaN	NaN	NaN	NaN	0	NaN	NaN	NaN	NaN	0	NaN	NaN	NaN	NaN	0	NaN	NaN
O75718	Cartilage-associated protein	CRTAP	26.1457	26.1769	0.243151	0.00929986	3	26.4194	26.3074	0.252612	0.00956161	3	26.4006	26.4006	0.0100195	0.000379518	2	26.4987	26.4987	0.285606	0.0107781	2	26.2499	26.2499	0.0370838	0.00141272	2	26.8624	26.8624	NaN	NaN	1	26.0718	26.0718	NaN	NaN	1	NaN	NaN	NaN	NaN	0	25.8524	25.8524	0.856153	0.0331169	2	25.8884	26.242
O75794	Cell division cycle protein 123 homolog	CDC123	NaN	NaN	NaN	NaN	0	25.2311	25.2311	NaN	NaN	1	NaN	NaN	NaN	NaN	0	NaN	NaN	NaN	NaN	0	24.9966	24.9966	NaN	NaN	1	NaN	NaN	NaN	NaN	0	NaN	NaN	NaN	NaN	0	25.4024	25.4024	NaN	NaN	1	25.3562	25.3562	NaN	NaN	1	NaN	NaN
O75821	Eukaryotic translation initiation factor 3 subunit G	EIF3G	NaN	NaN	NaN	NaN	0	27.7212	27.7212	0.156736	0.00565402	2	27.727	27.727	0.335401	0.0120966	2	27.7093	27.7093	NaN	NaN	1	27.8768	27.8768	0.3572	0.0128135	2	27.892	27.892	NaN	NaN	1	NaN	NaN	NaN	NaN	0	27.2677	27.2677	NaN	NaN	1	27.2636	27.2636	NaN	NaN	1	NaN	27.8321
O75822	Eukaryotic translation initiation factor 3 subunit J	EIF3J	NaN	NaN	NaN	NaN	0	27.9195	27.9195	NaN	NaN	1	27.7875	27.7875	NaN	NaN	1	NaN	NaN	NaN	NaN	0	NaN	NaN	NaN	NaN	0	NaN	NaN	NaN	NaN	0	NaN	NaN	NaN	NaN	0	NaN	NaN	NaN	NaN	0	NaN	NaN	NaN	NaN	0	NaN	27.9195
O75832	26S proteasome non-ATPase regulatory subunit 10	PSMD10	27.2881	27.3637	0.327107	0.0119872	3	27.5744	27.4828	0.183086	0.0066397	3	27.3616	27.3117	0.379807	0.013881	3	27.286	27.261	0.258238	0.00946409	3	27.3045	27.3045	0.0116932	0.000428253	2	27.8954	27.8954	0.553859	0.0198549	2	NaN	NaN	NaN	NaN	0	26.4858	26.4858	NaN	NaN	1	NaN	NaN	NaN	NaN	0	26.9298	27.4828
O75844	CAAX prenyl protease 1 homolog	ZMPSTE24	25.6384	25.6384	0.0289067	0.00112748	2	25.6631	25.6631	NaN	NaN	1	26.1028	26.0953	0.0730413	0.00279822	3	25.9736	25.9736	NaN	NaN	1	25.9637	25.9637	NaN	NaN	1	NaN	NaN	NaN	NaN	0	25.5744	25.5744	NaN	NaN	1	NaN	NaN	NaN	NaN	0	26.6711	26.6711	NaN	NaN	1	25.6588	NaN
O75874	Isocitrate dehydrogenase [NADP] cytoplasmic	IDH1	28.2224	28.2573	0.509473	0.0180521	3	28.2487	28.6571	0.768873	0.0272179	3	28.2988	28.2724	0.255666	0.00903451	3	27.834	27.7544	0.900321	0.032346	3	27.9932	28.4781	1.01317	0.0361936	3	28.2758	28.7953	1.19266	0.0421796	3	27.6262	27.9714	0.755704	0.0273546	3	28.1303	28.0827	0.0909823	0.00323431	3	27.3407	27.409	1.07193	0.0392063	3	27.6963	28.6571
O75882	Attractin	ATRN	NaN	NaN	NaN	NaN	0	NaN	NaN	NaN	NaN	0	NaN	NaN	NaN	NaN	0	NaN	NaN	NaN	NaN	0	NaN	NaN	NaN	NaN	0	27.0453	27.0453	NaN	NaN	1	24.9391	24.9391	NaN	NaN	1	26.8964	26.8964	NaN	NaN	1	NaN	NaN	NaN	NaN	0	NaN	NaN
O75934	Pre-mRNA-splicing factor SPF27	BCAS2	25.6345	25.6345	NaN	NaN	1	NaN	NaN	NaN	NaN	0	26.7763	26.7763	NaN	NaN	1	26.0731	26.0731	NaN	NaN	1	27.6132	27.6132	NaN	NaN	1	26.7352	26.7352	1.10278	0.041248	2	26.3694	26.3694	0.0311361	0.00118077	2	26.3406	26.3406	0.395409	0.0150114	2	25.8352	25.8352	NaN	NaN	1	NaN	NaN
O75937	DnaJ homolog subfamily C member 8	DNAJC8	26.6583	26.6583	NaN	NaN	1	27.7245	27.7245	1.01747	0.0366994	2	26.6353	26.7286	0.212184	0.00796629	3	26.744	26.744	1.0359	0.038734	2	26.7799	26.7799	0.850835	0.0317714	2	27.0688	27.0688	NaN	NaN	1	26.7731	26.7731	0.336885	0.012583	2	26.846	26.846	NaN	NaN	1	27.2862	27.2862	0.227163	0.0083252	2	26.6583	28.444
O75940	Survival of motor neuron-related-splicing factor 30	SMNDC1	NaN	NaN	NaN	NaN	0	27.4241	27.4241	NaN	NaN	1	NaN	NaN	NaN	NaN	0	NaN	NaN	NaN	NaN	0	NaN	NaN	NaN	NaN	0	26.8368	26.8368	NaN	NaN	1	NaN	NaN	NaN	NaN	0	NaN	NaN	NaN	NaN	0	NaN	NaN	NaN	NaN	0	NaN	NaN
O75947	ATP synthase subunit d, mitochondrial	ATP5H	28.7126	28.7484	0.418592	0.0145787	3	28.7308	28.8438	0.246367	0.00857502	3	28.7458	28.8101	0.321052	0.0111687	3	28.2854	28.44	0.400272	0.0141512	3	28.5361	28.6664	0.429552	0.015053	3	26.4461	27.346	2.83992	0.107385	3	28.5046	28.4895	0.0424407	0.00148891	3	28.4975	28.529	0.267084	0.00937216	3	28.146	28.2938	0.46754	0.0166112	3	29.1121	28.4482
O75964	ATP synthase subunit g, mitochondrial	ATP5L	27.5049	27.4298	0.374929	0.0136313	3	27.7388	27.7674	0.0868597	0.00313134	3	27.866	27.8009	0.285642	0.0102505	3	27.8948	27.9419	0.289187	0.0103671	3	27.769	27.5736	0.507028	0.0182588	3	27.3345	27.1779	0.379826	0.0138955	3	28.1277	28.1277	0.351087	0.0124819	2	27.9079	28.0004	0.330639	0.0118475	3	27.1204	27.1204	NaN	NaN	1	27.1732	27.7674
O75976	Carboxypeptidase D	CPD	NaN	NaN	NaN	NaN	0	NaN	NaN	NaN	NaN	0	NaN	NaN	NaN	NaN	0	26.4747	26.4747	NaN	NaN	1	25.8858	25.8858	0.379314	0.0146534	2	NaN	NaN	NaN	NaN	0	NaN	NaN	NaN	NaN	0	NaN	NaN	NaN	NaN	0	NaN	NaN	NaN	NaN	0	NaN	NaN
O76003	Glutaredoxin-3	GLRX3	28.2096	28.1514	0.393062	0.0139336	3	27.2161	27.1878	0.29384	0.0107966	3	27.6524	27.3102	0.808402	0.0292344	3	28.0498	28.0498	1.10707	0.0394679	2	27.3486	27.399	0.506504	0.0185203	3	27.5217	27.5898	0.494122	0.0179539	3	28.4894	28.4894	NaN	NaN	1	27.9353	27.9353	NaN	NaN	1	27.568	27.568	NaN	NaN	1	28.1514	27.1878
O76021	Ribosomal L1 domain-containing protein 1	RSL1D1	27.0664	27.0664	NaN	NaN	1	27.0412	27.0412	NaN	NaN	1	26.9409	26.9409	0.670546	0.0248895	2	NaN	NaN	NaN	NaN	0	NaN	NaN	NaN	NaN	0	27.3746	27.3746	NaN	NaN	1	26.6112	26.6112	NaN	NaN	1	NaN	NaN	NaN	NaN	0	NaN	NaN	NaN	NaN	0	NaN	27.0412
O76031	ATP-dependent Clp protease ATP-binding subunit clpX-like, mitochondrial	CLPX	NaN	NaN	NaN	NaN	0	NaN	NaN	NaN	NaN	0	NaN	NaN	NaN	NaN	0	NaN	NaN	NaN	NaN	0	26.3823	26.3823	NaN	NaN	1	28.1533	28.1533	NaN	NaN	1	26.6082	26.6082	NaN	NaN	1	26.6687	26.6687	NaN	NaN	1	26.9578	26.9578	NaN	NaN	1	NaN	NaN
O76070	Gamma-synuclein	SNCG	NaN	NaN	NaN	NaN	0	23.1715	23.1715	NaN	NaN	1	NaN	NaN	NaN	NaN	0	NaN	NaN	NaN	NaN	0	NaN	NaN	NaN	NaN	0	NaN	NaN	NaN	NaN	0	23.7668	23.7668	NaN	NaN	1	NaN	NaN	NaN	NaN	0	NaN	NaN	NaN	NaN	0	NaN	23.1715
O76071	Probable cytosolic iron-sulfur protein assembly protein CIAO1	CIAO1	NaN	NaN	NaN	NaN	0	NaN	NaN	NaN	NaN	0	NaN	NaN	NaN	NaN	0	NaN	NaN	NaN	NaN	0	22.3817	22.3817	NaN	NaN	1	NaN	NaN	NaN	NaN	0	NaN	NaN	NaN	NaN	0	NaN	NaN	NaN	NaN	0	NaN	NaN	NaN	NaN	0	NaN	NaN
O76094	Signal recognition particle subunit SRP72	SRP72	29.7432	29.9239	0.523845	0.0176123	3	29.9773	29.9773	0.31343	0.0104556	2	29.3981	29.48	0.231546	0.00787623	3	29.2453	29.2453	1.18046	0.0403641	2	29.8637	30.3246	0.987128	0.0330544	3	29.3286	29.3286	0.137468	0.00468715	2	29.1883	29.1883	0.08233	0.00282065	2	28.7141	28.7494	0.190815	0.00664535	3	29.2285	29.2285	0.0321584	0.00110024	2	29.9239	29.7557
O94760	N(G),N(G)-dimethylarginine dimethylaminohydrolase 1	DDAH1	28.4356	28.4356	NaN	NaN	1	27.5973	27.5973	NaN	NaN	1	27.4959	27.4959	NaN	NaN	1	28.811	28.811	NaN	NaN	1	NaN	NaN	NaN	NaN	0	NaN	NaN	NaN	NaN	0	NaN	NaN	NaN	NaN	0	26.083	26.083	NaN	NaN	1	NaN	NaN	NaN	NaN	0	28.4356	27.5973
O94776	Metastasis-associated protein MTA2	MTA2	25.3031	25.3031	NaN	NaN	1	NaN	NaN	NaN	NaN	0	NaN	NaN	NaN	NaN	0	NaN	NaN	NaN	NaN	0	NaN	NaN	NaN	NaN	0	NaN	NaN	NaN	NaN	0	NaN	NaN	NaN	NaN	0	NaN	NaN	NaN	NaN	0	28.239	28.239	NaN	NaN	1	25.3031	NaN
O94804	Serine/threonine-protein kinase 10	STK10	NaN	NaN	NaN	NaN	0	NaN	NaN	NaN	NaN	0	NaN	NaN	NaN	NaN	0	NaN	NaN	NaN	NaN	0	NaN	NaN	NaN	NaN	0	25.4829	25.4829	NaN	NaN	1	NaN	NaN	NaN	NaN	0	NaN	NaN	NaN	NaN	0	NaN	NaN	NaN	NaN	0	NaN	NaN
O94808	Glutamine--fructose-6-phosphate aminotransferase [isomerizing] 2	GFPT2	27.7071	27.7071	NaN	NaN	1	27.5992	27.5992	NaN	NaN	1	NaN	NaN	NaN	NaN	0	27.4146	27.4146	NaN	NaN	1	NaN	NaN	NaN	NaN	0	NaN	NaN	NaN	NaN	0	NaN	NaN	NaN	NaN	0	24.1346	24.1346	0.161238	0.0066808	2	NaN	NaN	NaN	NaN	0	NaN	27.5992
O94813	Slit homolog 2 protein;Slit homolog 2 protein N-product;Slit homolog 2 protein C-product	SLIT2	NaN	NaN	NaN	NaN	0	NaN	NaN	NaN	NaN	0	NaN	NaN	NaN	NaN	0	NaN	NaN	NaN	NaN	0	NaN	NaN	NaN	NaN	0	NaN	NaN	NaN	NaN	0	NaN	NaN	NaN	NaN	0	NaN	NaN	NaN	NaN	0	28.5189	28.5189	NaN	NaN	1	NaN	NaN
O94826	Mitochondrial import receptor subunit TOM70	TOMM70A	27.5335	27.2278	0.580207	0.0210728	3	27.0337	27.0234	0.506783	0.0187463	3	27.1757	27.2297	0.161739	0.0059516	3	27.7596	27.7774	0.245755	0.00885297	3	27.641	27.351	0.538367	0.0194771	3	27.6326	27.3689	0.648117	0.0234548	3	27.5902	27.5902	0.499762	0.0181137	2	27.4129	27.3756	0.281284	0.010261	3	27.5554	27.5554	0.0758535	0.00275276	2	28.2027	27.5456
O94832	Unconventional myosin-Id	MYO1D	NaN	NaN	NaN	NaN	0	NaN	NaN	NaN	NaN	0	24.7909	25.579	1.53435	0.0618917	3	25.6294	25.6294	NaN	NaN	1	NaN	NaN	NaN	NaN	0	NaN	NaN	NaN	NaN	0	NaN	NaN	NaN	NaN	0	NaN	NaN	NaN	NaN	0	NaN	NaN	NaN	NaN	0	NaN	NaN
O94855	Protein transport protein Sec24D	SEC24D	NaN	NaN	NaN	NaN	0	26.5064	26.5064	NaN	NaN	1	NaN	NaN	NaN	NaN	0	NaN	NaN	NaN	NaN	0	NaN	NaN	NaN	NaN	0	26.1853	26.1853	NaN	NaN	1	NaN	NaN	NaN	NaN	0	NaN	NaN	NaN	NaN	0	NaN	NaN	NaN	NaN	0	NaN	26.5064
O94874	E3 UFM1-protein ligase 1	UFL1	NaN	NaN	NaN	NaN	0	28.7297	28.7297	NaN	NaN	1	26.911	26.911	NaN	NaN	1	NaN	NaN	NaN	NaN	0	NaN	NaN	NaN	NaN	0	NaN	NaN	NaN	NaN	0	NaN	NaN	NaN	NaN	0	NaN	NaN	NaN	NaN	0	NaN	NaN	NaN	NaN	0	NaN	28.7297
O94905	Erlin-2	ERLIN2	26.5373	26.5373	NaN	NaN	1	NaN	NaN	NaN	NaN	0	NaN	NaN	NaN	NaN	0	26.6086	26.6086	0.481258	0.0180865	2	26.5618	26.5618	0.263559	0.00992247	2	26.2678	26.2678	NaN	NaN	1	NaN	NaN	NaN	NaN	0	NaN	NaN	NaN	NaN	0	26.6125	26.6125	NaN	NaN	1	NaN	NaN
O94906	Pre-mRNA-processing factor 6	PRPF6	25.2763	25.2763	NaN	NaN	1	NaN	NaN	NaN	NaN	0	NaN	NaN	NaN	NaN	0	NaN	NaN	NaN	NaN	0	NaN	NaN	NaN	NaN	0	NaN	NaN	NaN	NaN	0	NaN	NaN	NaN	NaN	0	NaN	NaN	NaN	NaN	0	NaN	NaN	NaN	NaN	0	NaN	NaN
O94925	Glutaminase kidney isoform, mitochondrial	GLS	27.2528	26.9995	1.86365	0.0683838	3	27.0823	27.0823	0.638129	0.0235626	2	26.2325	26.2809	0.595062	0.0226841	3	NaN	NaN	NaN	NaN	0	26.2641	26.2641	0.620793	0.0236366	2	25.4391	25.4391	0.0702659	0.00276212	2	NaN	NaN	NaN	NaN	0	NaN	NaN	NaN	NaN	0	NaN	NaN	NaN	NaN	0	25.5288	27.5335
O94973	AP-2 complex subunit alpha-2	AP2A2	26.1665	26.1665	NaN	NaN	1	NaN	NaN	NaN	NaN	0	NaN	NaN	NaN	NaN	0	25.3708	25.3708	NaN	NaN	1	25.8394	25.8394	0.631708	0.0244475	2	25.6697	25.6697	0.747214	0.0291088	2	NaN	NaN	NaN	NaN	0	NaN	NaN	NaN	NaN	0	NaN	NaN	NaN	NaN	0	26.1665	NaN
O94979	Protein transport protein Sec31A	SEC31A	26.2137	26.3018	0.23151	0.00883163	3	26.355	26.355	0.431195	0.016361	2	25.7479	25.7479	0.0939045	0.00364707	2	26.2969	26.2969	NaN	NaN	1	26.0582	26.0582	0.348809	0.0133858	2	26.539	26.539	0.154723	0.00583001	2	NaN	NaN	NaN	NaN	0	NaN	NaN	NaN	NaN	0	26.4204	26.4204	NaN	NaN	1	26.3018	26.0501
O94992	Protein HEXIM1	HEXIM1	NaN	NaN	NaN	NaN	0	NaN	NaN	NaN	NaN	0	NaN	NaN	NaN	NaN	0	NaN	NaN	NaN	NaN	0	21.7236	21.7236	NaN	NaN	1	NaN	NaN	NaN	NaN	0	NaN	NaN	NaN	NaN	0	NaN	NaN	NaN	NaN	0	NaN	NaN	NaN	NaN	0	NaN	NaN
O95070	Protein YIF1A	YIF1A	NaN	NaN	NaN	NaN	0	24.7825	24.7825	NaN	NaN	1	NaN	NaN	NaN	NaN	0	NaN	NaN	NaN	NaN	0	NaN	NaN	NaN	NaN	0	NaN	NaN	NaN	NaN	0	22.8034	22.8034	NaN	NaN	1	NaN	NaN	NaN	NaN	0	NaN	NaN	NaN	NaN	0	NaN	NaN
O95155	Ubiquitin conjugation factor E4 B	UBE4B	25.7688	25.7688	NaN	NaN	1	NaN	NaN	NaN	NaN	0	NaN	NaN	NaN	NaN	0	NaN	NaN	NaN	NaN	0	NaN	NaN	NaN	NaN	0	NaN	NaN	NaN	NaN	0	NaN	NaN	NaN	NaN	0	NaN	NaN	NaN	NaN	0	NaN	NaN	NaN	NaN	0	NaN	NaN
O95163	Elongator complex protein 1	IKBKAP	27.0123	27.0123	NaN	NaN	1	NaN	NaN	NaN	NaN	0	NaN	NaN	NaN	NaN	0	25.562	25.562	NaN	NaN	1	NaN	NaN	NaN	NaN	0	NaN	NaN	NaN	NaN	0	NaN	NaN	NaN	NaN	0	NaN	NaN	NaN	NaN	0	NaN	NaN	NaN	NaN	0	NaN	NaN
O95182	NADH dehydrogenase [ubiquinone] 1 alpha subcomplex subunit 7	NDUFA7	NaN	NaN	NaN	NaN	0	NaN	NaN	NaN	NaN	0	NaN	NaN	NaN	NaN	0	NaN	NaN	NaN	NaN	0	NaN	NaN	NaN	NaN	0	NaN	NaN	NaN	NaN	0	29.121	29.121	NaN	NaN	1	26.371	26.371	NaN	NaN	1	NaN	NaN	NaN	NaN	0	NaN	NaN
O95202	LETM1 and EF-hand domain-containing protein 1, mitochondrial	LETM1	27.4285	27.4144	0.103283	0.00376555	3	27.5294	27.5513	0.125012	0.00454105	3	27.2368	27.185	0.300935	0.0110488	3	27.4196	27.4196	0.364409	0.0132901	2	26.8761	26.5667	0.702758	0.026148	3	27.2446	27.5422	0.974063	0.0357525	3	26.7665	26.7665	0.426735	0.0159429	2	27.5391	27.5391	0.0223358	0.000811059	2	26.7676	26.7676	0.267907	0.0100086	2	27.333	27.3948
O95218	Zinc finger Ran-binding domain-containing protein 2	ZRANB2	NaN	NaN	NaN	NaN	0	NaN	NaN	NaN	NaN	0	NaN	NaN	NaN	NaN	0	NaN	NaN	NaN	NaN	0	NaN	NaN	NaN	NaN	0	NaN	NaN	NaN	NaN	0	NaN	NaN	NaN	NaN	0	26.0579	26.0579	NaN	NaN	1	NaN	NaN	NaN	NaN	0	NaN	NaN
O95219	Sorting nexin-4	SNX4	NaN	NaN	NaN	NaN	0	NaN	NaN	NaN	NaN	0	28.5873	28.5873	NaN	NaN	1	NaN	NaN	NaN	NaN	0	NaN	NaN	NaN	NaN	0	NaN	NaN	NaN	NaN	0	NaN	NaN	NaN	NaN	0	NaN	NaN	NaN	NaN	0	NaN	NaN	NaN	NaN	0	NaN	NaN
O95232	Luc7-like protein 3	LUC7L3	NaN	NaN	NaN	NaN	0	26.3057	26.3057	NaN	NaN	1	26.335	26.335	NaN	NaN	1	NaN	NaN	NaN	NaN	0	27.451	27.451	NaN	NaN	1	NaN	NaN	NaN	NaN	0	NaN	NaN	NaN	NaN	0	NaN	NaN	NaN	NaN	0	NaN	NaN	NaN	NaN	0	NaN	NaN
O95239	Chromosome-associated kinesin KIF4A;Chromosome-associated kinesin KIF4B	KIF4A	NaN	NaN	NaN	NaN	0	NaN	NaN	NaN	NaN	0	NaN	NaN	NaN	NaN	0	NaN	NaN	NaN	NaN	0	NaN	NaN	NaN	NaN	0	NaN	NaN	NaN	NaN	0	25.4706	25.4706	NaN	NaN	1	NaN	NaN	NaN	NaN	0	NaN	NaN	NaN	NaN	0	NaN	NaN
O95292	Vesicle-associated membrane protein-associated protein B/C	VAPB	28.0995	28.0995	NaN	NaN	1	27.7288	27.7288	0.0420079	0.00151496	2	27.5769	27.8269	0.494571	0.0179342	3	NaN	NaN	NaN	NaN	0	26.6966	26.6966	0.0481108	0.00180213	2	NaN	NaN	NaN	NaN	0	28.1625	28.1625	NaN	NaN	1	NaN	NaN	NaN	NaN	0	28.1205	28.1205	NaN	NaN	1	NaN	27.7585
O95299	NADH dehydrogenase [ubiquinone] 1 alpha subcomplex subunit 10, mitochondrial	NDUFA10	NaN	NaN	NaN	NaN	0	NaN	NaN	NaN	NaN	0	NaN	NaN	NaN	NaN	0	28.2244	28.2244	NaN	NaN	1	NaN	NaN	NaN	NaN	0	NaN	NaN	NaN	NaN	0	NaN	NaN	NaN	NaN	0	26.5501	26.5501	NaN	NaN	1	NaN	NaN	NaN	NaN	0	NaN	NaN
O95347	Structural maintenance of chromosomes protein 2	SMC2	NaN	NaN	NaN	NaN	0	NaN	NaN	NaN	NaN	0	NaN	NaN	NaN	NaN	0	NaN	NaN	NaN	NaN	0	24.9777	24.9777	NaN	NaN	1	25.7148	25.7148	NaN	NaN	1	NaN	NaN	NaN	NaN	0	25.7559	25.7559	NaN	NaN	1	26.1491	26.1491	NaN	NaN	1	NaN	NaN
O95372	Acyl-protein thioesterase 2	LYPLA2	25.334	25.334	NaN	NaN	1	24.8965	25.2243	0.646349	0.0259615	3	24.5927	24.6037	0.227089	0.00923397	3	24.7666	24.7666	0.349702	0.0141199	2	24.637	24.637	0.677137	0.0274846	2	24.0302	24.0302	NaN	NaN	1	25.5787	25.5787	NaN	NaN	1	25.7607	25.7607	1.04528	0.0405766	2	25.1882	25.1882	NaN	NaN	1	25.334	24.1519
O95373	Importin-7	IPO7	27.304	26.9348	0.648843	0.0237636	3	27.0735	27.0735	0.128847	0.00475914	2	27.6362	27.6546	0.352454	0.0127534	3	26.8617	26.8617	0.0936564	0.00348661	2	27.327	27.1613	0.287319	0.0105141	3	27.159	27.159	0.432834	0.015937	2	26.8936	26.877	0.491764	0.0182856	3	26.8919	26.8919	0.605983	0.0225341	2	26.8359	26.8359	0.323197	0.0120434	2	28.0532	26.9824
O95394	Phosphoacetylglucosamine mutase	PGM3	25.1806	25.1806	NaN	NaN	1	25.1782	25.2398	0.711813	0.028271	3	25.3277	25.3277	0.405225	0.0159993	2	26.658	26.658	NaN	NaN	1	26.5248	26.5248	NaN	NaN	1	26.0052	26.0052	0.0308083	0.0011847	2	26.6089	26.695	0.243487	0.0091506	3	26.464	26.8618	0.801276	0.0302779	3	27.2741	27.2741	NaN	NaN	1	NaN	25.2398
O95400	CD2 antigen cytoplasmic tail-binding protein 2	CD2BP2	NaN	NaN	NaN	NaN	0	NaN	NaN	NaN	NaN	0	NaN	NaN	NaN	NaN	0	24.4769	24.4769	NaN	NaN	1	NaN	NaN	NaN	NaN	0	NaN	NaN	NaN	NaN	0	NaN	NaN	NaN	NaN	0	NaN	NaN	NaN	NaN	0	NaN	NaN	NaN	NaN	0	NaN	NaN
O95433	Activator of 90 kDa heat shock protein ATPase homolog 1	AHSA1	28.4081	28.4081	NaN	NaN	1	28.6881	28.6881	NaN	NaN	1	28.4374	28.4374	0.090027	0.00316579	2	29.0222	29.0222	NaN	NaN	1	27.6732	27.6732	NaN	NaN	1	28.4105	28.4105	NaN	NaN	1	NaN	NaN	NaN	NaN	0	27.5667	27.5667	NaN	NaN	1	28.3468	28.3213	0.101122	0.00356732	3	NaN	28.6881
O95453	Poly(A)-specific ribonuclease PARN	PARN	27.7695	27.7695	0.00294286	0.000105975	2	27.6214	27.6214	NaN	NaN	1	28.1893	28.1893	NaN	NaN	1	NaN	NaN	NaN	NaN	0	27.0501	27.0501	NaN	NaN	1	28.0148	28.0148	NaN	NaN	1	28.4703	28.4703	NaN	NaN	1	28.5144	28.5144	NaN	NaN	1	27.4599	27.4599	0.050115	0.00182502	2	27.7716	NaN
O95456	Proteasome assembly chaperone 1	PSMG1	NaN	NaN	NaN	NaN	0	NaN	NaN	NaN	NaN	0	NaN	NaN	NaN	NaN	0	25.4543	25.4543	NaN	NaN	1	24.3734	24.3734	NaN	NaN	1	NaN	NaN	NaN	NaN	0	NaN	NaN	NaN	NaN	0	NaN	NaN	NaN	NaN	0	NaN	NaN	NaN	NaN	0	NaN	NaN
O95478	Ribosome biogenesis protein NSA2 homolog	NSA2	NaN	NaN	NaN	NaN	0	25.8441	25.8441	NaN	NaN	1	NaN	NaN	NaN	NaN	0	NaN	NaN	NaN	NaN	0	NaN	NaN	NaN	NaN	0	NaN	NaN	NaN	NaN	0	NaN	NaN	NaN	NaN	0	NaN	NaN	NaN	NaN	0	NaN	NaN	NaN	NaN	0	NaN	NaN
O95486	Protein transport protein Sec24A	SEC24A	NaN	NaN	NaN	NaN	0	24.6044	24.6044	NaN	NaN	1	NaN	NaN	NaN	NaN	0	NaN	NaN	NaN	NaN	0	NaN	NaN	NaN	NaN	0	NaN	NaN	NaN	NaN	0	NaN	NaN	NaN	NaN	0	NaN	NaN	NaN	NaN	0	NaN	NaN	NaN	NaN	0	NaN	NaN
O95487	Protein transport protein Sec24B	SEC24B	26.7082	26.9981	0.546794	0.0204729	3	27.2918	27.2918	NaN	NaN	1	26.6237	26.6237	0.221462	0.00831821	2	27.0094	27.0094	0.0197085	0.000729691	2	26.05	26.05	0.613262	0.0235417	2	26.2587	26.4933	1.41057	0.0537181	3	25.1335	25.1335	1.53939	0.0612485	2	26.1647	25.8639	0.654894	0.0250297	3	25.0976	25.0976	2.31994	0.0924367	2	27.049	27.2918
O95573	Long-chain-fatty-acid--CoA ligase 3	ACSL3	NaN	NaN	NaN	NaN	0	NaN	NaN	NaN	NaN	0	NaN	NaN	NaN	NaN	0	NaN	NaN	NaN	NaN	0	25.7057	25.7057	0.133769	0.00520389	2	NaN	NaN	NaN	NaN	0	NaN	NaN	NaN	NaN	0	NaN	NaN	NaN	NaN	0	NaN	NaN	NaN	NaN	0	NaN	NaN
O95707	Ribonuclease P protein subunit p29	POP4	NaN	NaN	NaN	NaN	0	NaN	NaN	NaN	NaN	0	23.3268	23.3268	NaN	NaN	1	NaN	NaN	NaN	NaN	0	NaN	NaN	NaN	NaN	0	NaN	NaN	NaN	NaN	0	NaN	NaN	NaN	NaN	0	NaN	NaN	NaN	NaN	0	NaN	NaN	NaN	NaN	0	NaN	NaN
O95714	E3 ubiquitin-protein ligase HERC2	HERC2	NaN	NaN	NaN	NaN	0	NaN	NaN	NaN	NaN	0	NaN	NaN	NaN	NaN	0	28.2352	28.2352	NaN	NaN	1	NaN	NaN	NaN	NaN	0	28.092	28.092	NaN	NaN	1	NaN	NaN	NaN	NaN	0	28.4895	28.4895	0.207392	0.0072796	2	27.6047	27.6047	NaN	NaN	1	NaN	NaN
O95747	Serine/threonine-protein kinase OSR1	OXSR1	26.1993	26.5309	0.707225	0.026994	3	25.766	25.766	NaN	NaN	1	26.5108	26.5108	0.114691	0.00432618	2	NaN	NaN	NaN	NaN	0	NaN	NaN	NaN	NaN	0	NaN	NaN	NaN	NaN	0	26.1483	26.1483	NaN	NaN	1	NaN	NaN	NaN	NaN	0	NaN	NaN	NaN	NaN	0	26.6799	NaN
O95757	Heat shock 70 kDa protein 4L	HSPA4L	27.2605	27.2605	NaN	NaN	1	27.0911	27.0911	0.068201	0.00251747	2	27.1773	27.1179	0.365922	0.0134642	3	27.7331	27.7331	NaN	NaN	1	NaN	NaN	NaN	NaN	0	NaN	NaN	NaN	NaN	0	27.6522	27.6522	NaN	NaN	1	NaN	NaN	NaN	NaN	0	28.2856	28.2856	NaN	NaN	1	NaN	27.1394
O95758	Polypyrimidine tract-binding protein 3	PTBP3	29.2369	29.4344	1.15729	0.0395834	3	27.9016	27.5465	0.744225	0.0266732	3	28.0636	27.715	0.66088	0.0235493	3	28.5629	28.4757	0.624577	0.0218667	3	28.5694	28.4059	0.495557	0.0173457	3	28.9579	28.9579	0.456943	0.0157796	2	29.2809	29.4938	0.765939	0.0261583	3	29.5432	29.5365	0.0982495	0.00332562	3	29.1372	28.9823	0.366306	0.0125718	3	27.9936	28.7569
O95777	U6 snRNA-associated Sm-like protein LSm8	LSM8	26.2272	26.2272	NaN	NaN	1	25.7977	25.7977	NaN	NaN	1	27.6048	27.6048	NaN	NaN	1	NaN	NaN	NaN	NaN	0	NaN	NaN	NaN	NaN	0	28.4855	28.4855	NaN	NaN	1	NaN	NaN	NaN	NaN	0	NaN	NaN	NaN	NaN	0	NaN	NaN	NaN	NaN	0	NaN	NaN
O95782	AP-2 complex subunit alpha-1	AP2A1	26.1665	26.1665	NaN	NaN	1	NaN	NaN	NaN	NaN	0	NaN	NaN	NaN	NaN	0	25.3708	25.3708	NaN	NaN	1	25.9653	25.9653	0.809739	0.0311854	2	25.6697	25.6697	0.747214	0.0291088	2	NaN	NaN	NaN	NaN	0	NaN	NaN	NaN	NaN	0	NaN	NaN	NaN	NaN	0	26.1665	NaN
O95793	Double-stranded RNA-binding protein Staufen homolog 1	STAU1	29.3527	29.3527	0.660941	0.0225172	2	29.4674	29.4674	0.290607	0.00986198	2	29.434	29.4589	0.141785	0.00481705	3	NaN	NaN	NaN	NaN	0	30.6458	30.6458	NaN	NaN	1	NaN	NaN	NaN	NaN	0	NaN	NaN	NaN	NaN	0	NaN	NaN	NaN	NaN	0	30.1299	30.1299	NaN	NaN	1	28.8854	29.2619
O95816	BAG family molecular chaperone regulator 2	BAG2	27.0275	27.0275	NaN	NaN	1	NaN	NaN	NaN	NaN	0	26.8376	26.8376	0.505564	0.0188379	2	NaN	NaN	NaN	NaN	0	27.5896	27.5896	NaN	NaN	1	26.7439	26.7439	NaN	NaN	1	NaN	NaN	NaN	NaN	0	NaN	NaN	NaN	NaN	0	NaN	NaN	NaN	NaN	0	27.0275	NaN
O95817	BAG family molecular chaperone regulator 3	BAG3	NaN	NaN	NaN	NaN	0	26.7821	26.7821	NaN	NaN	1	NaN	NaN	NaN	NaN	0	NaN	NaN	NaN	NaN	0	NaN	NaN	NaN	NaN	0	NaN	NaN	NaN	NaN	0	NaN	NaN	NaN	NaN	0	NaN	NaN	NaN	NaN	0	NaN	NaN	NaN	NaN	0	NaN	NaN
O95831	Apoptosis-inducing factor 1, mitochondrial	AIFM1	28.3984	28.5352	0.421505	0.0148425	3	27.8902	28.5121	1.13793	0.0408002	3	28.4605	28.5949	0.638016	0.0224176	3	28.0413	28.0413	0.0614063	0.00218985	2	27.5765	27.9067	0.649278	0.0235447	3	27.6891	27.7048	0.0643112	0.00232262	3	26.6476	26.6476	1.63139	0.061221	2	28.1012	28.0804	0.175846	0.00625762	3	27.6115	27.6115	NaN	NaN	1	28.5352	28.5121
O95834	Echinoderm microtubule-associated protein-like 2	EML2	27.4889	27.4889	NaN	NaN	1	NaN	NaN	NaN	NaN	0	NaN	NaN	NaN	NaN	0	NaN	NaN	NaN	NaN	0	NaN	NaN	NaN	NaN	0	NaN	NaN	NaN	NaN	0	NaN	NaN	NaN	NaN	0	NaN	NaN	NaN	NaN	0	NaN	NaN	NaN	NaN	0	NaN	NaN
O95861	3(2),5-bisphosphate nucleotidase 1	BPNT1	27.6186	27.6186	0.347859	0.0125951	2	27.2371	27.2624	0.250256	0.00918806	3	27.3181	27.3181	0.598825	0.0219204	2	27.0627	27.0627	0.4483	0.0165652	2	27.6941	27.7964	0.203848	0.00736071	3	27.7992	27.7992	0.238294	0.00857196	2	27.5198	27.5713	0.527282	0.0191601	3	27.0001	27.0001	0.442268	0.0163802	2	27.6839	27.6839	NaN	NaN	1	NaN	27.2624
O95865	N(G),N(G)-dimethylarginine dimethylaminohydrolase 2	DDAH2	NaN	NaN	NaN	NaN	0	NaN	NaN	NaN	NaN	0	NaN	NaN	NaN	NaN	0	NaN	NaN	NaN	NaN	0	27.6203	27.6203	NaN	NaN	1	NaN	NaN	NaN	NaN	0	NaN	NaN	NaN	NaN	0	NaN	NaN	NaN	NaN	0	27.5379	27.5379	NaN	NaN	1	NaN	NaN
O95881	Thioredoxin domain-containing protein 12	TXNDC12	27.4732	27.6907	0.957145	0.0348393	3	27.1072	27.3109	0.408184	0.0150581	3	27.6548	27.6483	0.0632427	0.00228686	3	27.5798	27.5798	0.139992	0.00507591	2	27.8052	27.8052	0.335962	0.0120827	2	27.8564	27.8564	0.426844	0.015323	2	NaN	NaN	NaN	NaN	0	28.1278	28.1278	NaN	NaN	1	26.9536	26.9536	NaN	NaN	1	28.3028	27.3109
O95954	Formimidoyltransferase-cyclodeaminase;Glutamate formimidoyltransferase;Formimidoyltetrahydrofolate cyclodeaminase	FTCD	NaN	NaN	NaN	NaN	0	27.4162	27.4162	0.965959	0.0352332	2	NaN	NaN	NaN	NaN	0	NaN	NaN	NaN	NaN	0	26.2503	26.2503	NaN	NaN	1	NaN	NaN	NaN	NaN	0	NaN	NaN	NaN	NaN	0	26.73	26.73	0.387541	0.0144984	2	NaN	NaN	NaN	NaN	0	NaN	28.0992
O95967	EGF-containing fibulin-like extracellular matrix protein 2	EFEMP2	NaN	NaN	NaN	NaN	0	NaN	NaN	NaN	NaN	0	NaN	NaN	NaN	NaN	0	27.8367	27.8367	0.487348	0.0175074	2	NaN	NaN	NaN	NaN	0	NaN	NaN	NaN	NaN	0	NaN	NaN	NaN	NaN	0	NaN	NaN	NaN	NaN	0	NaN	NaN	NaN	NaN	0	NaN	NaN
O96005	Cleft lip and palate transmembrane protein 1	CLPTM1	NaN	NaN	NaN	NaN	0	NaN	NaN	NaN	NaN	0	NaN	NaN	NaN	NaN	0	28.5524	28.5524	NaN	NaN	1	NaN	NaN	NaN	NaN	0	28.5671	28.5671	NaN	NaN	1	NaN	NaN	NaN	NaN	0	NaN	NaN	NaN	NaN	0	28.6072	28.6072	NaN	NaN	1	NaN	NaN
O96008	Mitochondrial import receptor subunit TOM40 homolog	TOMM40	28.2896	28.2896	NaN	NaN	1	27.1873	27.1873	NaN	NaN	1	27.3505	27.3656	0.175727	0.006425	3	26.7136	26.7136	1.11158	0.0416109	2	27.3458	27.2433	0.645087	0.02359	3	27.0036	27.0036	NaN	NaN	1	27.7582	27.7582	NaN	NaN	1	NaN	NaN	NaN	NaN	0	27.5775	27.5775	NaN	NaN	1	NaN	27.1873
O96019	Actin-like protein 6A	ACTL6A	27.2903	27.6324	0.742475	0.0272066	3	27.1291	27.1291	NaN	NaN	1	27.1224	27.1224	NaN	NaN	1	NaN	NaN	NaN	NaN	0	26.8663	26.8663	NaN	NaN	1	27.1694	27.1694	NaN	NaN	1	NaN	NaN	NaN	NaN	0	NaN	NaN	NaN	NaN	0	NaN	NaN	NaN	NaN	0	27.8001	NaN
P00338	L-lactate dehydrogenase A chain	LDHA	31.9663	31.8682	0.178199	0.00557459	3	31.6703	31.827	0.369718	0.011674	3	31.7857	31.9129	0.220778	0.00694584	3	32.0423	32.049	0.100646	0.00314103	3	32.1489	31.8741	0.546553	0.0170007	3	31.7813	31.7944	0.238293	0.00749789	3	31.8687	31.8895	0.105736	0.00331788	3	31.9459	32.0111	0.221283	0.00692682	3	31.9233	32.071	0.304145	0.00952737	3	31.8587	31.827
P00352	Retinal dehydrogenase 1	ALDH1A1	28.671	28.2294	0.797335	0.0278098	3	30.4753	29.4065	2.7238	0.0893775	3	28.0483	28.5393	1.11002	0.0395753	3	27.544	27.542	0.884571	0.0321148	3	28.2889	28.6759	1.29907	0.0459214	3	27.365	27.365	1.23674	0.0451944	2	28.0942	28.0977	0.229458	0.00816745	3	28.9384	28.8129	1.68337	0.0581708	3	28.3487	28.469	0.387839	0.013681	3	29.5915	28.4479
P00367	Glutamate dehydrogenase 1, mitochondrial;Glutamate dehydrogenase 2, mitochondrial	GLUD1	28.3307	28.4147	0.191587	0.00676251	3	29.4099	29.2711	0.471178	0.0160211	3	27.9494	27.7113	0.626105	0.0224014	3	28.4004	28.7115	0.725676	0.0255516	3	28.8944	28.7596	0.559452	0.0193619	3	28.4953	28.2654	0.599079	0.0210238	3	27.3696	27.6014	0.952405	0.0347979	3	30.4764	29.9574	1.04533	0.0342997	3	29.2389	29.4132	0.396875	0.0135735	3	28.466	29.2711
P00374	Dihydrofolate reductase	DHFR	NaN	NaN	NaN	NaN	0	NaN	NaN	NaN	NaN	0	26.7782	26.7782	NaN	NaN	1	NaN	NaN	NaN	NaN	0	NaN	NaN	NaN	NaN	0	NaN	NaN	NaN	NaN	0	NaN	NaN	NaN	NaN	0	NaN	NaN	NaN	NaN	0	NaN	NaN	NaN	NaN	0	NaN	NaN
P00387	NADH-cytochrome b5 reductase 3;NADH-cytochrome b5 reductase 3 membrane-bound form;NADH-cytochrome b5 reductase 3 soluble form	CYB5R3	NaN	NaN	NaN	NaN	0	NaN	NaN	NaN	NaN	0	NaN	NaN	NaN	NaN	0	26.2752	26.2752	NaN	NaN	1	NaN	NaN	NaN	NaN	0	26.1576	26.1576	NaN	NaN	1	27.0018	27.0018	0.39203	0.0145187	2	26.0626	26.0626	NaN	NaN	1	26.2535	26.2535	NaN	NaN	1	NaN	NaN
P00390	Glutathione reductase, mitochondrial	GSR	29.0623	29.0919	0.132984	0.00457583	3	29.2556	29.1582	0.268498	0.00917766	3	28.9895	29.0362	0.174626	0.00602378	3	29.2855	29.2855	0.599629	0.0204753	2	28.9043	28.9043	0.285305	0.00987068	2	28.5577	28.1647	0.808482	0.0283105	3	29.3657	29.5274	0.403711	0.0137477	3	29.0961	29.0961	0.624905	0.0214773	2	29.2625	28.865	0.850816	0.0290753	3	28.917	29.1582
P00441	Superoxide dismutase [Cu-Zn]	SOD1	30.7407	30.6229	0.824977	0.0268366	3	30.2945	30.2945	0.165287	0.00545602	2	30.3549	30.3549	0.294205	0.00969218	2	31.3434	31.3434	1.03818	0.0331229	2	30.001	30.001	0.150124	0.00500396	2	29.9773	29.9773	0.110453	0.00368455	2	30.3496	30.3496	0.18489	0.00609203	2	30.4562	30.4747	0.0736455	0.00241808	3	30.9643	30.9643	0.916359	0.029594	2	30.6229	30.1776
P00450	Ceruloplasmin	CP	32.7116	32.9185	0.427962	0.0130829	3	33.3884	33.443	0.167055	0.0050034	3	32.7985	32.7778	0.0657977	0.00200612	3	34.1393	34.2775	0.352164	0.0103155	3	32.4318	31.6762	1.98191	0.06111	3	33.5502	33.8641	0.761612	0.0227007	3	34.1785	33.8747	1.20011	0.035113	3	33.6128	33.6251	0.623295	0.0185434	3	33.3591	34.004	2.20514	0.066103	3	32.9967	33.5213
P00451	Coagulation factor VIII;Factor VIIIa heavy chain, 200 kDa isoform;Factor VIIIa heavy chain, 92 kDa isoform;Factor VIII B chain;Factor VIIIa light chain	F8	26.926	27.8083	1.81685	0.0674758	3	29.4757	29.6744	0.570941	0.0193699	3	29.8732	29.4972	0.670713	0.0224519	3	28.3495	28.1505	0.844783	0.0297989	3	29.1852	29.1852	0.658566	0.022565	2	30.1107	29.7062	0.79788	0.0264982	3	27.464	27.464	0.64053	0.0233225	2	29.9155	29.9155	0.180405	0.00603047	2	29.5024	29.5024	0.117681	0.00398885	2	27.8083	29.6744
P00488	Coagulation factor XIII A chain	F13A1	32.0443	33.5712	2.80965	0.0876802	3	33.2375	33.6771	1.39158	0.0418678	3	30.3731	30.2923	0.381482	0.0125599	3	32.2151	32.3817	2.45507	0.0762087	3	28.9164	29.6	4.65132	0.160854	3	30.2356	30.4107	0.769714	0.0254572	3	33.8788	33.132	1.34433	0.0396806	3	31.6014	31.9181	0.641415	0.020297	3	31.3269	32.1456	2.85054	0.0909933	3	33.7598	34.3562
P00491	Purine nucleoside phosphorylase	PNP	28.9543	29.2718	0.604923	0.0208923	3	28.4396	28.4789	0.155792	0.00547799	3	28.5241	28.4894	0.108702	0.00381087	3	28.0521	28.0521	NaN	NaN	1	29.0937	29.0108	0.359565	0.0123589	3	27.8908	28.0945	0.531191	0.0190454	3	28.089	27.8116	0.740696	0.0263697	3	28.629	28.478	0.331096	0.011565	3	28.3169	27.9237	0.842415	0.0297496	3	29.3343	28.4789
P00492	Hypoxanthine-guanine phosphoribosyltransferase	HPRT1	28.6173	28.7406	0.465021	0.0162496	3	29.2842	29.2673	0.58154	0.0198585	3	29.3021	29.1546	0.27712	0.00945735	3	28.8787	28.6807	0.460683	0.0159524	3	28.7367	29.0821	0.848855	0.0295391	3	29.1897	29.1844	0.929449	0.0318417	3	29.218	29.1404	0.689579	0.0236012	3	28.7152	29.0127	0.545203	0.0189866	3	28.8129	29.0092	0.695063	0.0241234	3	28.7406	29.874
P00505	Aspartate aminotransferase, mitochondrial	GOT2	29.1299	29.1273	0.68905	0.0236544	3	28.9121	28.4254	1.32662	0.0458846	3	29.1726	29.5236	0.610925	0.0209418	3	28.5646	28.5096	0.124528	0.0043595	3	28.8019	29.0726	0.633612	0.021999	3	28.6686	28.264	0.794022	0.0276966	3	27.3681	27.3681	NaN	NaN	1	28.4918	28.7472	0.481412	0.0168965	3	28.4488	28.822	0.931372	0.0327385	3	28.4422	27.8975
P00558	Phosphoglycerate kinase 1	PGK1	30.7851	30.7938	0.162424	0.00527605	3	30.6735	30.7528	0.313257	0.0102126	3	30.9746	31.047	0.135961	0.00438944	3	30.8473	30.8358	0.242185	0.00785109	3	30.7863	30.7114	0.148893	0.00483634	3	30.6394	30.6658	0.0737246	0.0024062	3	30.8791	30.9469	0.120538	0.00390354	3	30.7558	30.7431	0.301221	0.00979394	3	30.9698	30.8889	0.173579	0.00560476	3	30.943	30.9396
P00568	Adenylate kinase isoenzyme 1	AK1	27.1576	27.1576	NaN	NaN	1	26.8595	26.8595	NaN	NaN	1	26.9947	26.9422	0.345255	0.0127897	3	27.4254	27.4254	NaN	NaN	1	NaN	NaN	NaN	NaN	0	27.8622	27.8622	NaN	NaN	1	27.0252	27.0252	0.403447	0.0149285	2	NaN	NaN	NaN	NaN	0	NaN	NaN	NaN	NaN	0	27.1576	26.8595
P00734	Prothrombin;Activation peptide fragment 1;Activation peptide fragment 2;Thrombin light chain;Thrombin heavy chain	F2	33.4587	33.6866	0.771536	0.0230593	3	32.725	33.2379	1.14186	0.0348925	3	32.3221	32.1904	0.400132	0.0123795	3	33.8804	34.2666	0.825241	0.0243575	3	31.9557	32.144	1.89867	0.0594155	3	32.7961	32.8606	0.502517	0.0153225	3	33.5609	33.4516	0.591647	0.0176291	3	31.8916	32.0983	1.43379	0.0449584	3	32.2888	33.1228	2.3791	0.0736819	3	34.0907	33.5204
P00736	Complement C1r subcomponent;Complement C1r subcomponent heavy chain;Complement C1r subcomponent light chain	C1R	34.0496	34.0091	0.673757	0.0197875	3	34.1179	34.3832	0.469645	0.0137653	3	34.0151	34.0488	0.233677	0.00686981	3	34.7956	34.4705	0.791297	0.0227413	3	34.4729	34.8236	1.08357	0.0314324	3	34.8415	34.9884	0.381011	0.0109355	3	34.824	34.5965	0.534912	0.0153604	3	34.8456	34.6941	0.305197	0.00875853	3	34.8694	35.3458	1.32093	0.0378823	3	34.0091	33.5756
P00738	Haptoglobin;Haptoglobin alpha chain;Haptoglobin beta chain	HP	34.2962	34.0675	0.576933	0.0168221	3	33.7389	34.2208	1.13993	0.0337867	3	34.2555	34.1601	0.465196	0.0135802	3	35.1573	35.4663	0.65575	0.0186519	3	33.944	33.2784	1.3553	0.0399274	3	34.382	34.5694	0.601126	0.0174837	3	35.6782	35.8342	1.19057	0.0333696	3	35.1643	34.8779	0.535606	0.0152315	3	35.4081	35.8356	1.12207	0.0316895	3	34.0675	32.4372
P00739	Haptoglobin-related protein	HPR	33.6504	33.5365	0.475795	0.0141394	3	33.4092	33.7005	0.525884	0.0157407	3	33.3891	33.397	0.514539	0.0154104	3	34.5051	34.9495	0.775711	0.0224811	3	33.7671	33.3625	1.30541	0.0386591	3	33.9115	33.7349	0.38549	0.0113675	3	34.9986	35.1599	0.327107	0.00934628	3	34.5107	34.4259	0.477052	0.0138233	3	34.5586	34.7248	1.21837	0.0352552	3	33.5365	32.8022
P00740	Coagulation factor IX;Coagulation factor IXa light chain;Coagulation factor IXa heavy chain	F9	25.9434	25.9434	NaN	NaN	1	NaN	NaN	NaN	NaN	0	NaN	NaN	NaN	NaN	0	NaN	NaN	NaN	NaN	0	26.7532	26.7532	NaN	NaN	1	NaN	NaN	NaN	NaN	0	NaN	NaN	NaN	NaN	0	NaN	NaN	NaN	NaN	0	28.8387	28.8387	NaN	NaN	1	25.9434	NaN
P00747	Plasminogen;Plasmin heavy chain A;Activation peptide;Angiostatin;Plasmin heavy chain A, short form;Plasmin light chain B	PLG	33.1266	33.2904	0.750203	0.0226466	3	32.567	32.4179	0.335838	0.0103122	3	31.292	31.316	0.894189	0.0285756	3	34.1161	34.2727	0.560233	0.0164214	3	30.671	31.2384	2.75679	0.0898827	3	32.403	32.4305	0.546008	0.0168505	3	33.3633	33.012	0.655296	0.0196412	3	32.1866	32.3806	0.593645	0.0184439	3	32.6681	32.9948	1.78662	0.05469	3	33.7814	32.4179
P00748	Coagulation factor XII;Coagulation factor XIIa heavy chain;Beta-factor XIIa part 1;Coagulation factor XIIa light chain	F12	29.9775	29.9775	0.33214	0.0110797	2	29.4934	29.4934	NaN	NaN	1	28.6869	28.6869	NaN	NaN	1	30.411	30.9695	1.2746	0.0419125	3	28.8415	28.8415	2.05661	0.0713073	2	28.6547	28.5872	0.840448	0.0293302	3	30.8419	30.4607	1.57862	0.0511844	3	29.6858	29.6884	0.440458	0.0148373	3	28.9776	29.5445	1.04509	0.0360653	3	29.7426	NaN
P00751	Complement factor B;Complement factor B Ba fragment;Complement factor B Bb fragment	CFB	31.1621	30.9452	0.425069	0.0136406	3	31.3322	31.3605	0.171981	0.00548894	3	30.8563	31.0101	0.457995	0.0148428	3	33.1924	33.5694	0.877664	0.0264417	3	30.094	29.8414	2.58638	0.0859432	3	32.1149	32.3674	0.924264	0.0287799	3	32.2387	31.3822	1.56069	0.0484106	3	31.4961	31.4626	0.189776	0.00602539	3	30.5894	32.4926	4.13398	0.135144	3	30.9452	31.3605
P00813	Adenosine deaminase	ADA	NaN	NaN	NaN	NaN	0	29.972	29.972	0.311518	0.0103937	2	29.0453	29.099	0.72737	0.0250426	3	NaN	NaN	NaN	NaN	0	29.5225	29.5225	NaN	NaN	1	NaN	NaN	NaN	NaN	0	NaN	NaN	NaN	NaN	0	NaN	NaN	NaN	NaN	0	NaN	NaN	NaN	NaN	0	NaN	30.1923
P00846	ATP synthase subunit a	MT-ATP6	27.8374	27.8374	0.0219501	0.000788512	2	27.692	27.692	NaN	NaN	1	27.8958	27.8958	NaN	NaN	1	27.384	27.384	NaN	NaN	1	27.6794	27.6794	NaN	NaN	1	26.9824	27.2278	0.631475	0.0234032	3	NaN	NaN	NaN	NaN	0	26.9343	26.9343	0.845045	0.0313743	2	26.8612	26.8612	NaN	NaN	1	27.8218	27.692
P00918	Carbonic anhydrase 2	CA2	29.5796	29.6121	0.0810333	0.0027395	3	29.5575	29.6049	0.502931	0.0170153	3	29.8662	29.9088	0.24516	0.00820861	3	29.2494	28.9212	0.675324	0.0230885	3	28.7434	28.7533	0.201953	0.00702608	3	29.4059	29.4282	0.174911	0.00594814	3	28.5563	28.5429	0.0749908	0.00262607	3	29.3301	29.2587	0.168167	0.00573362	3	28.8806	29.6497	1.39249	0.0482153	3	29.6121	29.0325
P00966	Argininosuccinate synthase	ASS1	NaN	NaN	NaN	NaN	0	NaN	NaN	NaN	NaN	0	NaN	NaN	NaN	NaN	0	NaN	NaN	NaN	NaN	0	NaN	NaN	NaN	NaN	0	NaN	NaN	NaN	NaN	0	27.5198	27.5198	NaN	NaN	1	28.6411	28.0067	1.38459	0.0483427	3	NaN	NaN	NaN	NaN	0	NaN	NaN
P01008	Antithrombin-III	SERPINC1	31.0017	31.0664	0.586462	0.0189171	3	30.9923	31.0068	0.123514	0.00398532	3	29.9699	30.0449	0.472355	0.015761	3	32.1874	32.3467	0.614235	0.0190831	3	29.4663	29.7477	2.77216	0.0940789	3	30.7228	30.8937	0.61117	0.019893	3	31.4922	31.3327	0.941408	0.0298933	3	30.7828	31.1371	0.688148	0.022355	3	30.3595	31.5965	2.81334	0.0926674	3	31.0664	31.0068
P01009	Alpha-1-antitrypsin;Short peptide from AAT	SERPINA1	34.4884	34.749	0.462357	0.0134062	3	34.7716	34.7785	0.198812	0.00571766	3	34.8795	34.8604	0.18152	0.00520421	3	35.7156	35.896	0.401003	0.0112277	3	34.4056	33.5949	1.58699	0.046126	3	34.994	35.2127	0.783939	0.0224021	3	35.4884	34.8922	1.20847	0.0340525	3	34.2384	34.8044	0.982565	0.0286978	3	35.4146	35.8838	1.66781	0.0470938	3	34.7616	34.9669
P01011	Alpha-1-antichymotrypsin;Alpha-1-antichymotrypsin His-Pro-less	SERPINA3	31.9774	32.085	0.532311	0.0166465	3	32.8624	32.9662	0.408874	0.012442	3	32.5941	32.4866	0.219085	0.00672162	3	33.2553	33.3576	0.538474	0.0161921	3	32.0754	31.4293	1.89067	0.0589445	3	33.0408	33.6364	1.24366	0.0376401	3	32.6677	32.464	1.17716	0.0360345	3	33.0511	33.0656	0.525689	0.0159053	3	33.2555	33.5357	1.98204	0.0596003	3	32.085	32.9662
P01019	Angiotensinogen;Angiotensin-1;Angiotensin-2;Angiotensin-3;Angiotensin-4;Angiotensin 1-9;Angiotensin 1-7;Angiotensin 1-5;Angiotensin 1-4	AGT	29.2051	30.0811	2.10017	0.0719111	3	28.8588	29.5119	1.58956	0.0550809	3	28.7585	28.7878	0.192498	0.00669361	3	30.8127	31.0733	0.48181	0.0156367	3	28.8411	28.8411	3.05697	0.105993	2	29.3656	29.3132	0.691434	0.0235457	3	29.5834	29.5834	4.08246	0.137998	2	29.0073	28.8684	1.02199	0.0352321	3	31.4148	31.4148	1.44801	0.0460933	2	30.7254	30.0177
P01023	Alpha-2-macroglobulin	A2M	35.7532	35.8215	0.752364	0.0210433	3	36.8222	36.6933	0.534693	0.0145209	3	36.3346	36.3744	0.606513	0.0166924	3	35.5944	35.3767	0.412487	0.0115885	3	35.5023	35.3763	0.797417	0.022461	3	35.8509	35.8071	0.313181	0.00873565	3	36.0046	35.9636	0.122502	0.00340241	3	35.6157	35.799	1.08275	0.030401	3	34.7877	35.3454	1.23697	0.0355577	3	36.4691	37.4095
P01024	Complement C3;Complement C3 beta chain;C3-beta-c;Complement C3 alpha chain;C3a anaphylatoxin;Acylation stimulating protein;Complement C3b alpha chain;Complement C3c alpha chain fragment 1;Complement C3dg fragment;Complement C3g fragment;Complement C3d fragment;Complement C3f fragment;Complement C3c alpha chain fragment 2	C3	35.5181	35.542	0.401109	0.0112931	3	35.8277	35.7817	0.376634	0.0105124	3	34.8798	34.7085	0.364191	0.0104413	3	36.6013	36.5655	0.267689	0.00731363	3	35.1043	34.596	1.12942	0.0321731	3	35.7486	36.0171	0.652883	0.0182632	3	35.1633	35.6375	1.01696	0.028921	3	35.6216	35.6368	0.112454	0.0031569	3	35.716	35.9887	1.91568	0.0536364	3	35.9068	36.2252
P01031	Complement C5;Complement C5 beta chain;Complement C5 alpha chain;C5a anaphylatoxin;Complement C5 alpha chain	C5	32.8404	32.7911	0.266435	0.00811304	3	32.9552	32.8709	0.375936	0.0114075	3	32.5297	32.5309	0.447586	0.0137593	3	33.9503	34.2242	0.481092	0.0141705	3	31.9716	32.0145	1.34907	0.0421957	3	33.252	33.296	0.137484	0.00413461	3	33.4627	33.0566	0.947199	0.0283061	3	32.5645	32.4845	0.147249	0.00452178	3	33.2085	33.5311	1.93878	0.0583821	3	33.128	33.3662
P01040	Cystatin-A;Cystatin-A, N-terminally processed	CSTA	28.1577	28.0535	0.98837	0.0351012	3	NaN	NaN	NaN	NaN	0	28.3669	28.3669	NaN	NaN	1	27.391	27.391	NaN	NaN	1	26.1256	26.1256	NaN	NaN	1	NaN	NaN	NaN	NaN	0	NaN	NaN	NaN	NaN	0	NaN	NaN	NaN	NaN	0	NaN	NaN	NaN	NaN	0	27.2256	NaN
P01042	Kininogen-1;Kininogen-1 heavy chain;T-kinin;Bradykinin;Lysyl-bradykinin;Kininogen-1 light chain;Low molecular weight growth-promoting factor	KNG1	31.8711	32.0077	0.328721	0.0103141	3	31.5799	31.9302	0.65424	0.020717	3	31.2925	31.5279	0.453766	0.0145008	3	33.0062	32.9447	0.133666	0.00404972	3	30.4983	29.9768	1.77158	0.0580878	3	31.0782	30.5464	1.03446	0.0332857	3	32.5349	31.9729	1.03486	0.0318079	3	31.3569	31.3881	0.129422	0.00412738	3	31.5418	32.3599	2.69221	0.0853537	3	32.0077	31.9844
P01111	GTPase NRas	NRAS	27.0421	27.0985	0.300042	0.0110953	3	27.1909	27.1087	0.232081	0.00853527	3	27.3837	27.2262	0.486967	0.0177831	3	28.0669	28.0669	NaN	NaN	1	27.4807	27.4807	0.154213	0.00561168	2	26.8489	26.8489	NaN	NaN	1	NaN	NaN	NaN	NaN	0	27.9127	27.9127	NaN	NaN	1	NaN	NaN	NaN	NaN	0	27.31	27.0111
P01116	GTPase KRas;GTPase KRas, N-terminally processed	KRAS	27.0421	27.0985	0.300042	0.0110953	3	27.1909	27.1087	0.232081	0.00853527	3	27.3837	27.2262	0.486967	0.0177831	3	28.0669	28.0669	NaN	NaN	1	27.4807	27.4807	0.154213	0.00561168	2	26.8489	26.8489	NaN	NaN	1	NaN	NaN	NaN	NaN	0	28.0989	28.0989	NaN	NaN	1	NaN	NaN	NaN	NaN	0	27.31	27.0111
P01833	Polymeric immunoglobulin receptor;Secretory component	PIGR	NaN	NaN	NaN	NaN	0	30.4156	30.4156	NaN	NaN	1	30.5213	30.363	1.40336	0.0459798	3	NaN	NaN	NaN	NaN	0	29.0336	29.0336	0.979239	0.0337277	2	29.8624	29.8624	1.70707	0.0571645	2	29.7954	29.7954	NaN	NaN	1	28.587	28.587	0.534557	0.0186993	2	30.4025	30.4025	NaN	NaN	1	NaN	NaN
P02042	Hemoglobin subunit delta	HBD	32.6658	32.8421	0.509107	0.0155853	3	32.4232	32.2415	0.362032	0.0111658	3	32.8395	32.4267	0.79542	0.0242215	3	32.1851	32.3803	0.628447	0.019526	3	32.0586	31.5512	1.02168	0.0318692	3	32.2855	32.3455	0.347493	0.0107631	3	31.7095	31.4177	0.633675	0.0199837	3	32.5905	32.4492	0.710632	0.0218049	3	32.3227	32.8127	1.08404	0.0335381	3	32.8421	32.8401
P02545	Prelamin-A/C;Lamin-A/C	LMNA	29.3434	29.4526	0.246632	0.00840503	3	29.3426	29.4029	0.150102	0.00511549	3	29.2243	29.2225	0.0839295	0.0028719	3	29.3014	29.3897	0.15587	0.00531955	3	28.8866	28.9628	0.333856	0.0115575	3	29.5923	29.723	0.29374	0.00992622	3	29.3393	29.7431	0.781833	0.026648	3	29.6844	29.7706	0.288234	0.00970993	3	29.5644	29.5644	0.00678531	0.000229509	2	29.061	29.1717
P02647	Apolipoprotein A-I;Proapolipoprotein A-I;Truncated apolipoprotein A-I	APOA1	34.8525	34.9799	0.430637	0.012356	3	34.8624	34.8025	0.389442	0.0111708	3	34.3694	34.3461	0.0567952	0.0016525	3	34.8237	34.9167	0.603979	0.0173439	3	34.39	34.0438	1.13587	0.0330291	3	33.9897	33.9677	0.526637	0.0154941	3	35.6311	35.525	0.405606	0.0113835	3	34.7648	34.7724	0.592759	0.0170505	3	34.5358	35.3741	1.47648	0.042752	3	35.2051	35.2783
P02649	Apolipoprotein E	APOE	32.1112	32.3635	1.66793	0.0519424	3	31.7378	31.7378	1.22145	0.0384856	2	31.9973	32.1546	0.965149	0.0301634	3	30.7533	31.9805	2.41835	0.078637	3	29.359	28.6089	1.89323	0.0644855	3	29.0126	29.3209	1.17694	0.0405667	3	30.5727	30.5677	1.33044	0.0435172	3	29.0144	28.2381	1.80394	0.0621741	3	29.7193	29.4395	1.46676	0.0493537	3	33.6386	32.6015
P02652	Apolipoprotein A-II;Proapolipoprotein A-II;Truncated apolipoprotein A-II	APOA2	32.4546	32.4546	0.0295338	0.000910005	2	31.9131	31.9621	0.398641	0.0124915	3	31.3093	31.0831	0.863451	0.0275781	3	32.7852	32.5998	0.547353	0.0166951	3	30.8461	30.4939	2.10188	0.0681407	3	31.1921	30.6794	0.892195	0.0286032	3	32.394	32.8222	0.819469	0.0252969	3	30.46	30.2838	1.83737	0.0603207	3	30.8865	32.1429	2.65662	0.0860123	3	32.4337	32.2849
P02654	Apolipoprotein C-I;Truncated apolipoprotein C-I	APOC1	31.8235	31.2062	1.51381	0.0475688	3	31.0476	30.3368	1.8606	0.0599275	3	31.021	30.6408	1.59065	0.0512765	3	31.5671	31.5048	1.33589	0.0423189	3	29.7582	29.7582	1.05938	0.0355997	2	28.8042	28.7657	0.611134	0.0212168	3	30.5532	31.0868	1.17127	0.0383357	3	29.547	29.5913	0.831931	0.0281562	3	29.3386	30.0695	1.75425	0.0597932	3	33.5485	33.1588
P02655	Apolipoprotein C-II;Proapolipoprotein C-II	APOC2	32.792	32.792	0.0835978	0.00254933	2	31.1872	31.1872	NaN	NaN	1	32.6861	32.658	1.32857	0.0406462	3	31.7894	32.6363	1.67008	0.0525357	3	29.4121	29.4121	NaN	NaN	1	29.8045	29.8739	0.691949	0.0232162	3	32.3633	32.1058	0.719943	0.0222457	3	29.7689	29.079	2.00413	0.0673229	3	31.6697	31.6697	0.592885	0.0187209	2	32.8512	31.1872
P02656	Apolipoprotein C-III	APOC3	33.6189	34.396	1.77395	0.0527666	3	30.8199	30.8199	NaN	NaN	1	33.0286	32.789	0.514197	0.0155683	3	33.9287	34.0849	1.58403	0.0466872	3	29.9735	29.9735	NaN	NaN	1	30.539	30.9512	1.1628	0.038076	3	33.6739	33.8703	0.482958	0.0143422	3	31.4954	31.4802	2.03612	0.0646481	3	31.7548	32.1576	2.25101	0.0708873	3	34.396	NaN
P02671	Fibrinogen alpha chain;Fibrinopeptide A;Fibrinogen alpha chain	FGA	37.8603	38.0317	0.598375	0.0158048	3	37.9416	37.999	0.15393	0.00405703	3	37.632	37.5805	0.102423	0.0027217	3	38.9642	38.854	0.442994	0.0113693	3	37.2866	37.1573	1.18304	0.0317282	3	37.8475	38.0082	0.419926	0.0110952	3	38.4988	37.9574	1.00111	0.0260036	3	37.5212	37.7159	1.21587	0.032405	3	38.5432	39.0734	1.36335	0.0353721	3	38.0317	38.0586
P02675	Fibrinogen beta chain;Fibrinopeptide B;Fibrinogen beta chain	FGB	38.3781	38.3571	0.715403	0.0186409	3	38.0297	38.2499	0.416529	0.0109527	3	37.9801	37.9196	0.151025	0.00397642	3	39.3406	39.4033	0.400225	0.0101733	3	37.7016	37.6189	1.41966	0.037655	3	38.1432	38.2911	0.387294	0.0101537	3	37.5897	38.4046	1.5646	0.0416231	3	38.3234	38.2537	0.473038	0.0123433	3	38.8804	39.2792	1.34449	0.0345802	3	38.3571	38.2499
P02679	Fibrinogen gamma chain	FGG	38.1308	38.2957	0.653712	0.0171439	3	37.9709	37.967	0.215959	0.00568748	3	37.6928	37.624	0.199936	0.00530434	3	38.9579	38.9092	0.51193	0.0131406	3	37.5018	37.3533	1.13195	0.0301838	3	38.0838	38.0472	0.307014	0.00806155	3	38.7411	38.3829	0.82497	0.0212944	3	38.3028	38.2464	0.479532	0.0125195	3	37.8935	39.34	2.84984	0.0752066	3	38.2957	37.967
P02741	C-reactive protein;C-reactive protein(1-205)	CRP	27.0429	26.8463	1.07348	0.0396953	3	32.7652	32.7542	0.747829	0.0228239	3	32.8598	32.7901	0.197856	0.00602123	3	31.1776	31.9898	2.42887	0.0779041	3	33.2968	33.3346	1.04077	0.0312573	3	33.3653	33.7462	1.03754	0.0310964	3	34.0836	34.0836	NaN	NaN	1	34.0551	34.9529	2.0198	0.0593097	3	34.5956	34.3244	0.897691	0.0259481	3	26.8463	32.7542
P02743	Serum amyloid P-component;Serum amyloid P-component(1-203)	APCS	32.0759	32.0133	0.419753	0.0130863	3	32.2961	32.3316	0.440635	0.0136436	3	31.1899	31.0931	0.552395	0.0177107	3	32.8644	33.1393	0.484346	0.0147377	3	31.3167	31.0038	0.888235	0.028363	3	32.1548	32.0378	0.544409	0.0169309	3	32.5462	32.3438	1.0432	0.0320528	3	31.9908	32.0185	0.185394	0.00579525	3	31.6045	32.1915	1.9432	0.0614849	3	32.5234	32.7178
P02745	Complement C1q subcomponent subunit A	C1QA	33.5012	33.3286	1.07406	0.0320605	3	33.0951	33.224	0.962734	0.0290899	3	33.519	33.5459	0.068838	0.0020537	3	34.2506	34.7292	1.05374	0.0307655	3	34.0266	34.3	0.851289	0.0250184	3	34.1174	33.8623	0.796501	0.0233459	3	35.0761	34.9175	0.338552	0.00965193	3	34.9612	34.9904	0.12179	0.00348357	3	34.9774	35.1646	0.945059	0.0270191	3	33.3286	33.224
P02746	Complement C1q subcomponent subunit B	C1QB	34.6848	35.0448	0.641963	0.0185085	3	34.7135	34.9029	0.476636	0.0137306	3	34.7039	34.6659	0.242356	0.00698355	3	35.0758	34.8799	0.398046	0.0113482	3	34.9265	35.1516	0.579425	0.0165898	3	35.1684	35.4402	0.484952	0.0137895	3	35.3188	35.1187	0.668098	0.0189162	3	34.9461	34.8587	0.388726	0.0111236	3	34.6811	34.8894	1.31973	0.0380534	3	35.066	34.1713
P02747	Complement C1q subcomponent subunit C	C1QC	34.9699	35.4448	1.03461	0.0295856	3	34.7565	35.0606	0.756177	0.0217564	3	34.5972	34.6335	0.144382	0.00417323	3	35.446	35.901	1.0738	0.030294	3	35.3112	35.8111	0.997663	0.0282534	3	35.3698	35.634	0.876671	0.0247858	3	36.1211	35.9815	0.419774	0.0116213	3	36.2268	36.3006	0.273333	0.00754504	3	35.5516	35.7335	1.05329	0.029627	3	35.4448	33.8956
P02748	Complement component C9;Complement component C9a;Complement component C9b	C9	31.7021	31.6962	0.392367	0.0123767	3	32.1551	32.2162	0.146163	0.00454556	3	31.703	31.451	0.509533	0.0160721	3	33.0038	33.0398	0.386281	0.0117041	3	31.6082	31.0337	1.32355	0.0418735	3	32.3157	32.801	1.12099	0.0346886	3	32.6078	32.2858	1.04474	0.0320395	3	32.2898	32.3213	0.191342	0.00592576	3	32.8184	32.9936	1.62305	0.0494555	3	31.6962	32.2609
P02749	Beta-2-glycoprotein 1	APOH	30.8405	30.511	0.611209	0.0198184	3	30.3346	30.1282	0.57571	0.0189787	3	30.4159	30.7579	0.699697	0.0230043	3	32.1478	32.3442	0.647283	0.0201346	3	30.4838	30.4838	2.30505	0.0756155	2	30.4002	30.1231	0.705152	0.0231957	3	30.6764	30.4228	1.81944	0.0593107	3	30.0749	30.6102	1.3923	0.0462943	3	30.0579	31.3824	2.47634	0.0823857	3	30.511	30.985
P02750	Leucine-rich alpha-2-glycoprotein	LRG1	28.9184	28.9184	1.16139	0.0401611	2	29.0393	29.0602	0.0979979	0.00337466	3	30.057	30.057	NaN	NaN	1	30.4042	29.997	0.865109	0.0284536	3	31.9707	31.9707	NaN	NaN	1	29.9373	29.9698	1.23052	0.0411033	3	30.9525	30.9525	1.4713	0.0475342	2	29.2553	29.2553	1.00624	0.0343953	2	30.5605	30.5605	0.951776	0.031144	2	NaN	29.1252
P02751	Fibronectin;Anastellin;Ugl-Y1;Ugl-Y2;Ugl-Y3	FN1	37.4657	37.4161	0.111617	0.00297916	3	36.9414	36.993	0.296993	0.00803958	3	36.7589	36.7945	0.567308	0.0154332	3	37.972	38.0542	0.394632	0.0103927	3	36.0752	36.7163	1.55343	0.0430609	3	37.0695	37.1501	0.434605	0.011724	3	37.4917	37.5192	0.217747	0.00580788	3	36.7102	37.0097	1.12751	0.0307138	3	36.6006	37.6294	1.78905	0.0488804	3	37.4161	37.2092
P02753	Retinol-binding protein 4;Plasma retinol-binding protein(1-182);Plasma retinol-binding protein(1-181);Plasma retinol-binding protein(1-179);Plasma retinol-binding protein(1-176)	RBP4	30.9609	30.7381	0.41793	0.0134986	3	30.213	29.6815	1.12633	0.0372796	3	29.2921	29.696	1.10218	0.0376274	3	31.6792	31.6792	0.928513	0.0293099	2	30.951	30.951	NaN	NaN	1	30.1194	30.344	0.497096	0.0165042	3	30.4895	29.8504	1.33187	0.0436829	3	30.05	30.05	NaN	NaN	1	29.8146	29.7054	2.29503	0.0769768	3	30.7017	31.5067
P02760	Protein AMBP;Alpha-1-microglobulin;Inter-alpha-trypsin inhibitor light chain;Trypstatin	AMBP	29.865	29.7444	0.46618	0.0156095	3	29.6154	29.6761	0.191532	0.00646729	3	28.7144	28.7761	0.489848	0.0170593	3	31.3616	31.4842	0.278299	0.00887385	3	27.7888	27.7888	1.24066	0.0446462	2	30.3754	30.3754	1.02382	0.0337056	2	30.0506	29.4364	1.51805	0.0505164	3	28.4655	28.5871	1.18178	0.0415161	3	29.6476	29.8094	2.04229	0.0688856	3	29.7444	29.7693
P02763	Alpha-1-acid glycoprotein 1	ORM1	30.8497	31.0239	0.390821	0.0126685	3	30.7235	30.9028	0.466737	0.0151915	3	30.4791	30.3458	0.495532	0.0162581	3	32.1672	31.9563	0.647148	0.0201183	3	31.6022	31.1209	1.84141	0.0582684	3	30.6941	31.6162	1.77923	0.0579667	3	32.1427	31.7925	1.90795	0.0593588	3	31.216	31.1719	0.135332	0.00433536	3	31.7822	32.0333	1.88955	0.0594531	3	31.1232	31.0739
P02765	Alpha-2-HS-glycoprotein;Alpha-2-HS-glycoprotein chain A;Alpha-2-HS-glycoprotein chain B	AHSG	32.0039	32.0255	0.433591	0.0135481	3	31.5065	31.6416	0.582139	0.0184768	3	31.2156	31.1495	0.196479	0.00629425	3	32.5857	32.4939	0.160665	0.00493052	3	31.3031	31.1357	1.28859	0.0411649	3	31.0909	31.2646	1.39363	0.0448245	3	32.5798	32.3671	0.734793	0.0225536	3	31.7772	31.7531	0.353622	0.0111281	3	31.6679	32.831	2.05788	0.064983	3	32.0255	31.6416
P02766	Transthyretin	TTR	32.4692	32.498	0.433451	0.0133496	3	31.965	31.8592	0.517032	0.0161749	3	30.4972	30.4392	0.366776	0.0120265	3	33.2065	33.2782	0.298294	0.00898301	3	31.1756	31.1756	2.68231	0.0860387	2	29.8409	29.808	0.473975	0.0158834	3	33.238	32.6751	1.01611	0.0305706	3	31.1046	31.2792	1.48318	0.0476836	3	30.8458	31.5663	2.26298	0.0733643	3	32.8875	32.5267
P02774	Vitamin D-binding protein	GC	31.8425	31.7254	0.403015	0.0126565	3	31.6599	31.7135	0.478646	0.0151184	3	31.0495	31.4637	1.02397	0.0329786	3	33.6812	33.862	0.608313	0.0180609	3	30.631	29.6051	2.62801	0.085796	3	32.0165	32.0256	0.314524	0.00982381	3	32.7953	32.2175	1.02686	0.0313111	3	31.5499	31.6659	0.487919	0.015465	3	31.9735	33.0218	2.71662	0.0849649	3	31.7254	31.1567
P02786	Transferrin receptor protein 1;Transferrin receptor protein 1, serum form	TFRC	29.2754	28.7336	1.09408	0.0373722	3	29.1514	29.0332	0.503139	0.0172595	3	30.9761	30.7912	0.501052	0.0161754	3	28.211	28.0885	0.548209	0.0194325	3	28.8789	28.8945	0.301249	0.0104315	3	30.5423	30.7588	0.788802	0.0258265	3	28.9947	28.9607	0.918682	0.0316845	3	28.7599	28.7659	0.814642	0.0283257	3	29.2165	28.8846	0.991657	0.0339416	3	30.5346	29.7032
P02787	Serotransferrin	TF	34.4094	34.6526	0.423647	0.0123119	3	34.7841	34.7804	0.0574958	0.00165293	3	33.9846	33.9553	0.102662	0.00302083	3	35.4587	35.3216	0.307732	0.0086786	3	33.8619	33.1624	1.36249	0.0402366	3	34.5038	34.4337	0.535206	0.0155115	3	35.0839	34.8136	0.675892	0.019265	3	33.7966	34.6368	1.53721	0.0454841	3	34.0768	34.8872	1.81716	0.0533254	3	34.6554	34.7804
P02790	Hemopexin	HPX	32.3577	32.3968	0.101193	0.00312732	3	32.1955	32.5263	0.96305	0.0299126	3	32.008	32.1608	0.486833	0.0152097	3	33.8314	33.7956	0.109951	0.00324996	3	31.3809	30.449	2.3577	0.0751319	3	31.9218	32.3863	1.34657	0.0421835	3	32.7608	32.7283	0.307855	0.00939708	3	32.5347	32.4746	0.148714	0.00457094	3	32.5571	33.2156	2.09161	0.0642443	3	32.3968	32.9495
P02792	Ferritin light chain	FTL	30.0693	30.7986	1.79444	0.0596769	3	34.2125	34.0668	2.09328	0.0611847	3	29.0552	27.9941	1.94988	0.0671095	3	29.3517	29.3517	NaN	NaN	1	30.0448	28.9159	2.26606	0.0754225	3	28.5955	29.1247	1.15407	0.0403584	3	29.9316	29.9316	0.041339	0.00138111	2	31.8448	30.5649	3.32099	0.104287	3	30.0034	30.0034	3.23426	0.107796	2	31.3842	34.0668
P02794	Ferritin heavy chain;Ferritin heavy chain, N-terminally processed	FTH1	26.2546	26.2546	1.41706	0.0539735	2	30.2152	30.9522	4.30125	0.142354	3	27.0706	27.0706	0.115958	0.00428356	2	NaN	NaN	NaN	NaN	0	28.1893	28.1893	NaN	NaN	1	NaN	NaN	NaN	NaN	0	NaN	NaN	NaN	NaN	0	30.3217	30.3217	2.30682	0.0760783	2	NaN	NaN	NaN	NaN	0	27.2566	30.9522
P03905	NADH-ubiquinone oxidoreductase chain 4	MT-ND4	NaN	NaN	NaN	NaN	0	NaN	NaN	NaN	NaN	0	NaN	NaN	NaN	NaN	0	23.5938	23.5938	NaN	NaN	1	NaN	NaN	NaN	NaN	0	24.8652	24.8652	NaN	NaN	1	NaN	NaN	NaN	NaN	0	NaN	NaN	NaN	NaN	0	NaN	NaN	NaN	NaN	0	NaN	NaN
P03952	Plasma kallikrein;Plasma kallikrein heavy chain;Plasma kallikrein light chain	KLKB1	29.0256	29.1096	0.3093	0.0106561	3	29.4427	29.5413	0.199543	0.00677736	3	28.1078	28.1078	0.0747503	0.00265942	2	30.5851	30.5851	0.634572	0.0207478	2	27.974	27.974	NaN	NaN	1	28.022	28.022	NaN	NaN	1	31.523	31.523	NaN	NaN	1	29.0107	29.0107	NaN	NaN	1	29.1569	29.1569	2.06023	0.0706601	2	29.2842	29.213
P04003	C4b-binding protein alpha chain	C4BPA	34.5209	34.7447	0.637793	0.0184756	3	34.9915	35.0402	0.283194	0.00809323	3	34.6574	34.5937	0.111185	0.00320812	3	35.0997	35.336	0.736382	0.0209797	3	34.8722	35.0501	0.508075	0.0145696	3	34.8256	35.0801	0.709506	0.0203731	3	35.8825	35.7177	0.624207	0.0173958	3	35.1584	35.1076	0.131751	0.00374736	3	35.132	35.5729	1.32104	0.0376022	3	35.0166	35.0402
P04004	Vitronectin;Vitronectin V65 subunit;Vitronectin V10 subunit;Somatomedin-B	VTN	32.9016	32.9423	0.46301	0.0140726	3	32.8358	32.8616	0.245023	0.00746208	3	32.6599	32.5549	0.381784	0.0116897	3	33.6898	33.651	0.250819	0.00744497	3	31.7731	31.6226	1.22108	0.0384314	3	32.978	33.2361	0.460364	0.0139597	3	32.9168	32.7068	0.597825	0.0181617	3	31.8343	31.9416	0.975089	0.0306301	3	33.1132	33.6135	1.49484	0.0451434	3	32.4196	33.0669
P04040	Catalase	CAT	28.222	27.7853	0.886925	0.0314268	3	29.0493	28.8765	0.558074	0.0192113	3	28.3126	28.1897	0.471829	0.016665	3	27.4841	27.4841	0.363501	0.0132259	2	27.4188	27.5627	0.914546	0.0333547	3	27.7637	27.9048	1.08511	0.0390837	3	NaN	NaN	NaN	NaN	0	28.5831	29.0768	1.20698	0.0422269	3	28.6798	28.6798	0.60549	0.0211121	2	27.7853	28.598
P04075	Fructose-bisphosphate aldolase A	ALDOA	30.207	30.308	0.268958	0.00890383	3	31.0119	30.8579	0.315835	0.0101843	3	29.4695	30.3441	1.71426	0.0581705	3	30.8057	30.8344	0.375622	0.0121933	3	30.6549	30.7791	0.657758	0.0214569	3	31.1765	31.2293	0.356279	0.0114278	3	30.959	30.8763	0.258765	0.00835833	3	31.2162	31.2104	0.0912662	0.00292368	3	31.0565	31.0742	0.284379	0.00915682	3	29.9021	30.8579
P04080	Cystatin-B	CSTB	28.9242	28.9202	0.199103	0.0068836	3	28.8985	28.7325	0.296486	0.0102596	3	28.6817	28.5742	0.399195	0.0139181	3	29.1025	29.1025	1.22651	0.0421443	2	28.7122	28.8545	0.426468	0.0148532	3	28.652	28.758	0.485455	0.0169431	3	29.3115	29.3115	NaN	NaN	1	28.876	28.876	NaN	NaN	1	28.9344	29.0357	0.277161	0.00957896	3	28.9202	28.7325
P04083	Annexin A1	ANXA1	29.9229	29.8411	0.251561	0.00840697	3	29.6576	29.5811	0.25203	0.00849801	3	29.5149	29.5365	0.292804	0.00992056	3	29.6075	29.5082	0.625825	0.0211373	3	29.576	29.5322	0.293274	0.00991595	3	29.8717	29.813	0.541448	0.0181258	3	29.4382	29.1647	0.508579	0.0172762	3	29.578	29.8135	0.427	0.0144364	3	29.5442	29.5465	0.023232	0.000786346	3	30.2051	29.4527
P04114	Apolipoprotein B-100;Apolipoprotein B-48	APOB	32.7766	33.5066	1.42152	0.04337	3	30.0102	29.5075	1.47871	0.0492735	3	31.8404	31.2734	1.05835	0.0332391	3	31.8298	31.4603	1.56723	0.0492379	3	29.9489	28.6934	2.30341	0.0769113	3	29.5592	29.5408	0.639342	0.0216292	3	31.0274	30.0937	1.67553	0.0540017	3	29.4369	28.6258	1.6837	0.0571971	3	28.7613	29.3393	3.85267	0.133953	3	33.6848	31.6748
P04179	Superoxide dismutase [Mn], mitochondrial	SOD2	27.8319	27.8319	0.270734	0.00972747	2	27.8952	27.8952	0.159254	0.00570902	2	27.9022	27.8319	0.28222	0.0101146	3	NaN	NaN	NaN	NaN	0	27.7501	27.7501	0.503962	0.0181607	2	27.3563	27.3563	NaN	NaN	1	27.5649	27.5649	NaN	NaN	1	27.8555	27.8555	0.100942	0.00362377	2	27.9561	27.9561	0.300804	0.0107599	2	27.6404	28.0079
P04181	Ornithine aminotransferase, mitochondrial;Ornithine aminotransferase, hepatic form;Ornithine aminotransferase, renal form	OAT	28.844	28.7602	0.225119	0.00780469	3	29.0551	28.9353	0.230369	0.00792867	3	28.8769	28.8386	0.148961	0.0051585	3	28.7135	28.7197	0.602157	0.0209712	3	28.5875	28.8262	0.418538	0.0146406	3	28.8734	29.0859	0.77009	0.0266713	3	28.522	28.522	0.0788773	0.00276549	2	29.4554	29.2313	1.18594	0.0402623	3	29.3614	29.5778	0.836171	0.0284786	3	28.6729	29.3207
P04183	Thymidine kinase, cytosolic	TK1	NaN	NaN	NaN	NaN	0	NaN	NaN	NaN	NaN	0	NaN	NaN	NaN	NaN	0	NaN	NaN	NaN	NaN	0	NaN	NaN	NaN	NaN	0	NaN	NaN	NaN	NaN	0	NaN	NaN	NaN	NaN	0	NaN	NaN	NaN	NaN	0	26.4433	26.4433	NaN	NaN	1	NaN	NaN
P04196	Histidine-rich glycoprotein	HRG	30.679	30.7694	0.469232	0.0152949	3	30.5633	30.2633	0.767881	0.0251243	3	29.767	30.5202	1.38609	0.0465645	3	31.5721	31.7789	0.458358	0.0145178	3	29.5254	29.5254	2.48621	0.0842057	2	30.8756	30.9564	0.418719	0.0135615	3	31.1914	31.0572	0.832531	0.0266911	3	30.5551	30.4301	0.504315	0.0165051	3	29.9305	31.5898	3.38864	0.113217	3	30.7694	31.4358
P04217	Alpha-1B-glycoprotein	A1BG	30.9709	31.1492	0.523342	0.0168979	3	30.9001	30.8543	0.181456	0.00587235	3	30.1759	30.3568	0.336751	0.0111596	3	32.1612	32.5072	0.609772	0.0189599	3	30.8266	30.8266	2.44633	0.0793578	2	30.8937	31.0576	0.784445	0.0253918	3	31.9519	31.3167	1.10716	0.0346508	3	30.8559	30.9832	0.320163	0.0103761	3	30.859	31.9892	2.88308	0.0934274	3	31.1492	31.1001
P04264	Keratin, type II cytoskeletal 1	KRT1	35.5851	35.4814	1.20795	0.0339454	3	35.985	35.9752	0.49167	0.0136632	3	35.4316	35.309	1.51748	0.0428283	3	34.2421	34.0258	0.665762	0.0194428	3	33.1104	33.1117	0.163153	0.00492753	3	34.5324	34.8721	0.738086	0.0213737	3	35.0819	35.0455	0.173465	0.00494457	3	34.1283	34.6932	2.12307	0.0622085	3	34.3874	34.7524	1.14903	0.0334143	3	35.4814	35.4982
P04275	von Willebrand factor;von Willebrand antigen 2	VWF	35.542	35.4052	0.410473	0.0115489	3	36.4791	36.4165	0.301177	0.00825615	3	36.1671	36.1331	0.172766	0.00477689	3	36.0597	36.0521	0.242952	0.00673751	3	35.4347	36.0805	1.61028	0.0454437	3	36.5867	36.5316	0.243947	0.00666765	3	35.4383	35.4328	0.470807	0.0132853	3	34.1034	35.1391	3.01223	0.0883263	3	35.1672	35.7632	1.49925	0.0426321	3	36.0034	36.4165
P04350	Tubulin beta-4A chain	TUBB4A	31.5041	31.303	0.360686	0.0114489	3	31.3675	31.4113	0.293781	0.00936577	3	31.1653	31.2481	0.156735	0.00502915	3	31.6315	31.4715	0.5382	0.0170147	3	31.6447	31.7574	0.416731	0.0131691	3	31.6136	31.558	0.219563	0.0069452	3	32.0439	32.0817	0.170751	0.00532865	3	31.3749	31.8637	0.971752	0.0309723	3	32.2065	32.1648	0.245635	0.00762686	3	31.303	31.637
P04406	Glyceraldehyde-3-phosphate dehydrogenase	GAPDH	33.881	33.8734	0.191104	0.00564043	3	33.9652	33.906	0.152117	0.00447861	3	33.8882	33.9697	0.183066	0.00540205	3	34.107	34.1696	0.14633	0.00429033	3	34.2237	34.0866	0.275548	0.00805139	3	33.9366	33.7615	0.347112	0.0102283	3	34.1692	34.3059	0.247578	0.00724564	3	34.116	34.2902	0.589618	0.0172827	3	34.253	34.2921	0.102202	0.00298374	3	34.0758	33.906
P04424	Argininosuccinate lyase	ASL	NaN	NaN	NaN	NaN	0	29.1342	29.1342	NaN	NaN	1	27.0855	27.0855	NaN	NaN	1	NaN	NaN	NaN	NaN	0	NaN	NaN	NaN	NaN	0	NaN	NaN	NaN	NaN	0	NaN	NaN	NaN	NaN	0	28.1453	28.1453	NaN	NaN	1	28.6657	28.6657	NaN	NaN	1	NaN	NaN
P04632	Calpain small subunit 1	CAPNS1	28.4988	28.5275	0.0884317	0.003103	3	28.8951	28.9053	0.669079	0.0231554	3	29.0958	28.8149	0.589206	0.0202505	3	28.6834	28.6769	0.660739	0.0230356	3	28.7352	28.687	1.14114	0.0397122	3	28.9233	28.8937	0.665895	0.0230228	3	28.3311	28.3302	0.208143	0.00734679	3	28.3215	28.1711	0.485872	0.0171556	3	28.605	28.7071	0.660233	0.023081	3	28.5275	29.559
P04637	Cellular tumor antigen p53	TP53	NaN	NaN	NaN	NaN	0	NaN	NaN	NaN	NaN	0	25.6123	25.6123	NaN	NaN	1	NaN	NaN	NaN	NaN	0	NaN	NaN	NaN	NaN	0	26.0572	26.0572	NaN	NaN	1	NaN	NaN	NaN	NaN	0	NaN	NaN	NaN	NaN	0	NaN	NaN	NaN	NaN	0	NaN	NaN
P04792	Heat shock protein beta-1	HSPB1	30.2193	30.138	0.252799	0.00836548	3	30.5095	30.5095	0.0163516	0.000535953	2	30.2366	30.2366	0.490143	0.0162103	2	30.7113	30.7113	0.207383	0.00675265	2	30.2639	30.3956	0.91484	0.0302287	3	29.7929	29.7929	NaN	NaN	1	29.7947	29.7947	0.130228	0.00437083	2	30.0993	30.2344	0.389858	0.0129524	3	29.8219	29.8095	0.42216	0.014156	3	30.138	30.521
P04818	Thymidylate synthase	TYMS	NaN	NaN	NaN	NaN	0	24.995	24.995	NaN	NaN	1	NaN	NaN	NaN	NaN	0	25.5445	25.5445	NaN	NaN	1	24.1239	24.1239	NaN	NaN	1	NaN	NaN	NaN	NaN	0	25.7485	25.7485	0.127157	0.00493842	2	24.8222	24.8222	0.742876	0.0299279	2	24.5052	24.5052	1.2231	0.0499118	2	NaN	24.995
P04843	Dolichyl-diphosphooligosaccharide--protein glycosyltransferase subunit 1	RPN1	28.4967	28.6008	0.226845	0.00796037	3	28.2887	28.3495	0.343319	0.0121363	3	28.5938	28.6446	0.205819	0.00719803	3	28.444	28.523	0.218612	0.00768573	3	27.7971	27.7144	0.663921	0.0238845	3	27.69	27.6849	0.41216	0.0148848	3	28.0315	27.8925	0.367464	0.013109	3	27.8345	28.2201	0.726269	0.0260924	3	28.1054	28.497	0.773856	0.0275341	3	28.2365	28.5975
P04844	Dolichyl-diphosphooligosaccharide--protein glycosyltransferase subunit 2	RPN2	28.1349	28.1349	0.340159	0.0120903	2	28.0602	28.0602	0.171845	0.00612414	2	28.4332	28.5073	0.178352	0.00627266	3	NaN	NaN	NaN	NaN	0	28.039	28.039	0.364363	0.0129949	2	26.8615	26.8615	NaN	NaN	1	27.0138	27.0138	NaN	NaN	1	27.1969	27.1969	NaN	NaN	1	NaN	NaN	NaN	NaN	0	NaN	28.1817
P04899	Guanine nucleotide-binding protein G(i) subunit alpha-2	GNAI2	NaN	NaN	NaN	NaN	0	28.5526	28.5526	0.505888	0.0177177	2	28.516	28.516	0.462372	0.0162144	2	28.6755	28.4712	0.929235	0.0324052	3	NaN	NaN	NaN	NaN	0	28.5913	28.5913	NaN	NaN	1	27.4075	27.4075	NaN	NaN	1	28.0122	28.0122	NaN	NaN	1	28.1036	28.1036	NaN	NaN	1	NaN	28.1949
P04908	Histone H2A type 1-B/E;Histone H2A type 3;Histone H2A type 1-D	HIST1H2AB	30.9915	30.9915	0.365605	0.011797	2	32.2878	32.2357	0.519813	0.0160993	3	31.3473	31.2371	0.208042	0.00663668	3	31.9331	31.3449	1.05037	0.0328928	3	31.9148	32.543	1.22726	0.0384543	3	30.1759	29.2082	1.79533	0.0594956	3	31.715	31.5844	0.622122	0.019616	3	33.1287	32.763	1.07888	0.0325663	3	31.8396	31.9522	0.541477	0.0170064	3	30.733	31.7961
P05023	Sodium/potassium-transporting ATPase subunit alpha-1	ATP1A1	29.0085	29.1193	0.405642	0.0139836	3	29.0142	29.0597	0.175043	0.00603299	3	29.2625	29.1034	0.414376	0.0141607	3	28.4318	28.4318	0.502005	0.0176564	2	29.1041	29.0981	0.306316	0.0105249	3	28.7065	28.9033	0.390347	0.0135978	3	28.3261	28.3261	0.539022	0.0190292	2	28.8936	28.8797	0.0887322	0.003071	3	28.5146	28.4348	0.266814	0.00935708	3	29.3472	28.8209
P05026	Sodium/potassium-transporting ATPase subunit beta-1	ATP1B1	27.4452	27.4452	0.0458827	0.00167179	2	27.6977	27.6977	0.0255403	0.00092211	2	27.4789	27.6226	0.331265	0.0120552	3	28.1537	28.1537	0.476077	0.01691	2	27.2276	27.2276	0.619559	0.0227548	2	26.7121	26.7121	0.200468	0.00750475	2	27.9999	27.9999	NaN	NaN	1	NaN	NaN	NaN	NaN	0	26.9629	26.9629	NaN	NaN	1	27.4777	27.6796
P05062	Fructose-bisphosphate aldolase B	ALDOB	28.8876	28.8876	0.101866	0.00352629	2	31.5295	31.6778	0.626327	0.0198648	3	28.8151	28.8151	0.484701	0.0168211	2	28.8892	28.7423	0.399041	0.0138128	3	28.7832	28.7832	1.4505	0.0503941	2	29.3547	29.3547	0.348759	0.0118809	2	29.5746	29.5588	0.271786	0.00918986	3	32.5502	32.7995	0.490179	0.0150591	3	29.9549	30.0668	0.331465	0.0110655	3	NaN	30.8423
P05090	Apolipoprotein D	APOD	31.1464	31.1464	NaN	NaN	1	29.9024	29.9024	NaN	NaN	1	NaN	NaN	NaN	NaN	0	NaN	NaN	NaN	NaN	0	30.8245	30.8245	NaN	NaN	1	30.2293	30.2293	1.10534	0.0365653	2	31.2057	31.2057	NaN	NaN	1	30.4922	30.4922	NaN	NaN	1	30.5132	30.5132	0.340569	0.0111614	2	31.1464	29.9024
P05091	Aldehyde dehydrogenase, mitochondrial	ALDH2	28.3599	28.3599	NaN	NaN	1	27.9465	27.9465	NaN	NaN	1	27.6114	27.5623	0.218578	0.00791622	3	NaN	NaN	NaN	NaN	0	27.0629	27.0629	NaN	NaN	1	27.4424	27.4424	0.925371	0.0337205	2	27.2903	27.2903	0.214338	0.00785399	2	28.5788	28.5458	0.684267	0.0239431	3	27.9599	27.9855	0.358833	0.0128339	3	NaN	NaN
P05106	Integrin beta-3	ITGB3	NaN	NaN	NaN	NaN	0	NaN	NaN	NaN	NaN	0	26.5933	26.5933	NaN	NaN	1	NaN	NaN	NaN	NaN	0	NaN	NaN	NaN	NaN	0	NaN	NaN	NaN	NaN	0	26.7804	26.7804	NaN	NaN	1	NaN	NaN	NaN	NaN	0	29.0876	29.0876	0.453495	0.0155906	2	NaN	NaN
P05141	ADP/ATP translocase 2;ADP/ATP translocase 2, N-terminally processed	SLC25A5	31.2391	31.2797	0.0938481	0.00300419	3	31.361	31.3856	0.0519585	0.00165679	3	31.1919	31.1848	0.0505525	0.00162069	3	31.4576	31.3719	0.160311	0.0050961	3	31.2967	31.2846	0.127119	0.00406174	3	31.3007	31.2841	0.0624975	0.00199668	3	31.374	31.2291	0.284638	0.00907241	3	31.481	31.4183	0.154355	0.00490311	3	31.5274	31.5092	0.336608	0.0106767	3	31.3058	31.3961
P05155	Plasma protease C1 inhibitor	SERPING1	31.4315	31.3776	0.168202	0.00535138	3	30.9793	31.0468	0.138733	0.00447826	3	31.5691	31.7255	0.409762	0.0129799	3	32.158	31.8716	0.933488	0.0290281	3	31.1681	30.7916	2.9481	0.0945871	3	31.8295	32.0298	0.574094	0.0180365	3	32.108	31.8698	0.638555	0.0198877	3	31.5777	31.6632	0.21124	0.00668954	3	31.0213	32.4346	3.4055	0.109779	3	31.3776	31.0468
P05156	Complement factor I;Complement factor I heavy chain;Complement factor I light chain	CFI	30.071	29.9858	0.675691	0.0224698	3	29.9209	29.4847	0.922828	0.0308422	3	29.3892	29.9599	1.20011	0.0408352	3	31.4984	31.9056	0.981914	0.0311734	3	29.1681	28.4999	2.25312	0.0772462	3	30.1237	30.3453	1.06356	0.0353064	3	30.7388	30.2519	1.02466	0.0333343	3	29.9427	29.9704	0.0841544	0.00281051	3	29.919	29.6611	1.98332	0.0662895	3	30.7853	30.981
P05160	Coagulation factor XIII B chain	F13B	32.8983	33.7671	1.7777	0.0540362	3	33.7836	33.7629	0.748318	0.0221503	3	32.0412	32.0852	0.38883	0.0121353	3	34.6203	34.7282	0.864041	0.0249576	3	32.7793	32.7793	1.87841	0.0573048	2	32.5086	32.7384	0.597427	0.0183775	3	33.6405	33.6302	2.04069	0.0606616	3	32.2507	32.2357	0.526106	0.016313	3	32.3434	33.9017	3.29745	0.101951	3	33.7671	34.5421
P05161	Ubiquitin-like protein ISG15	ISG15	24.8267	24.8267	NaN	NaN	1	25.4708	25.4708	0.539465	0.0211798	2	NaN	NaN	NaN	NaN	0	NaN	NaN	NaN	NaN	0	NaN	NaN	NaN	NaN	0	25.3573	25.3573	NaN	NaN	1	NaN	NaN	NaN	NaN	0	25.8384	25.8384	NaN	NaN	1	NaN	NaN	NaN	NaN	0	NaN	25.0893
P05166	Propionyl-CoA carboxylase beta chain, mitochondrial	PCCB	NaN	NaN	NaN	NaN	0	NaN	NaN	NaN	NaN	0	25.8607	25.8607	NaN	NaN	1	NaN	NaN	NaN	NaN	0	26.5305	26.5305	1.4903	0.0561731	2	NaN	NaN	NaN	NaN	0	NaN	NaN	NaN	NaN	0	NaN	NaN	NaN	NaN	0	NaN	NaN	NaN	NaN	0	NaN	NaN
P05198	Eukaryotic translation initiation factor 2 subunit 1	EIF2S1	27.5949	27.5935	0.235292	0.00852664	3	27.2603	27.2603	0.414382	0.0152009	2	27.7129	27.8286	0.311836	0.0112524	3	27.8281	27.8281	0.555757	0.0199711	2	27.6427	27.5465	0.225871	0.00817112	3	27.7875	27.7875	0.201261	0.00724286	2	28.4876	28.4876	0.859081	0.0301563	2	27.963	27.963	0.101798	0.00364047	2	27.8932	27.8932	NaN	NaN	1	27.3603	27.5533
P05386	60S acidic ribosomal protein P1	RPLP1	30.4399	30.453	0.508078	0.0166912	3	30.485	30.485	NaN	NaN	1	29.8458	29.8458	0.743214	0.0249018	2	30.2419	30.2419	0.165487	0.00547211	2	30.1571	30.1493	0.327989	0.010876	3	30.8759	30.6898	0.912722	0.029561	3	29.8728	29.8728	NaN	NaN	1	30.4817	30.4817	NaN	NaN	1	30.4327	30.4327	0.7409	0.0243455	2	30.9413	NaN
P05387	60S acidic ribosomal protein P2	RPLP2	31.8154	31.8004	0.366556	0.0115213	3	31.873	31.8826	0.0345077	0.00108266	3	31.8208	31.9943	0.475041	0.0149286	3	31.2932	31.6413	0.748555	0.0239207	3	31.7779	31.9513	0.353218	0.0111152	3	32.0325	32.1055	0.492517	0.0153756	3	30.3431	30.3431	NaN	NaN	1	31.4864	31.4864	0.459986	0.014609	2	32.0342	32.0342	NaN	NaN	1	31.4566	31.9016
P05388	60S acidic ribosomal protein P0;60S acidic ribosomal protein P0-like	RPLP0	30.3019	30.2695	0.219217	0.00723443	3	30.41	30.4379	0.239068	0.00786149	3	30.1706	30.0743	0.385828	0.0127882	3	30.4985	30.6635	0.306447	0.0100479	3	30.5115	30.3306	0.419502	0.013749	3	30.7706	30.9261	0.30621	0.00995138	3	30.5125	30.5949	0.259654	0.00850976	3	30.7576	30.8689	0.240499	0.00781916	3	30.4232	30.4922	0.257129	0.00845175	3	30.1007	30.1582
P05455	Lupus La protein	SSB	28.9236	28.6274	0.596662	0.0206289	3	28.9249	29.0063	0.39387	0.013617	3	28.7579	28.7961	0.151114	0.00525471	3	28.5177	28.7877	0.580639	0.0203607	3	28.7167	28.7382	0.18974	0.00660731	3	29.0684	29.0548	0.333052	0.0114575	3	29.6896	29.6896	0.65926	0.0222051	2	28.7968	28.7502	0.266866	0.00926722	3	28.9043	28.9043	0.0118578	0.000410242	2	28.5331	29.0063
P05546	Heparin cofactor 2	SERPIND1	29.3561	29.2864	0.719654	0.0245147	3	28.5363	28.5861	0.913617	0.032016	3	27.7213	27.9724	0.43826	0.0158095	3	29.7594	29.0101	1.33957	0.0450132	3	29.3613	29.3613	1.83641	0.0625452	2	28.9268	28.9268	1.16838	0.0403909	2	29.677	28.858	1.43648	0.0484037	3	26.4707	26.4707	3.81567	0.144147	2	29.3947	29.3947	0.129765	0.00441458	2	29.2864	28.5861
P05556	Integrin beta-1	ITGB1	28.5943	28.5943	0.561933	0.0196519	2	27.4901	27.4901	NaN	NaN	1	NaN	NaN	NaN	NaN	0	NaN	NaN	NaN	NaN	0	NaN	NaN	NaN	NaN	0	27.9296	27.9296	0.222302	0.00795937	2	29.2189	29.2189	NaN	NaN	1	28.7999	28.7999	NaN	NaN	1	28.9644	28.9644	NaN	NaN	1	28.1969	NaN
P05783	Keratin, type I cytoskeletal 18	KRT18	32.1314	32.1407	0.127525	0.00396886	3	32.288	32.1727	0.423732	0.0131235	3	31.8098	31.7231	0.299052	0.00940125	3	31.6677	31.557	0.453124	0.0143087	3	31.4915	31.4859	0.540146	0.0171521	3	31.7061	31.7705	0.681348	0.0214895	3	32.1926	32.3411	0.30309	0.0094149	3	32.1436	32.1631	0.395056	0.0122903	3	32.2424	32.2463	0.0749706	0.00232522	3	32.2541	32.1727
P06280	Alpha-galactosidase A	GLA	28.6601	28.6601	NaN	NaN	1	NaN	NaN	NaN	NaN	0	NaN	NaN	NaN	NaN	0	NaN	NaN	NaN	NaN	0	NaN	NaN	NaN	NaN	0	NaN	NaN	NaN	NaN	0	NaN	NaN	NaN	NaN	0	NaN	NaN	NaN	NaN	0	NaN	NaN	NaN	NaN	0	NaN	NaN
P06454	Prothymosin alpha;Prothymosin alpha, N-terminally processed;Thymosin alpha-1	PTMA	31.7382	31.7382	NaN	NaN	1	32.0064	32.0064	NaN	NaN	1	27.6107	27.6107	NaN	NaN	1	NaN	NaN	NaN	NaN	0	NaN	NaN	NaN	NaN	0	30.8776	30.8776	NaN	NaN	1	30.1682	30.1682	NaN	NaN	1	NaN	NaN	NaN	NaN	0	NaN	NaN	NaN	NaN	0	NaN	NaN
P06493	Cyclin-dependent kinase 1	CDK1	28.9242	28.9242	0.675145	0.0233419	2	28.6817	28.6817	0.870856	0.0303628	2	28.4593	28.4593	0.383852	0.0134878	2	28.5294	28.6989	0.417607	0.0146378	3	28.6059	28.5119	0.412993	0.0144373	3	28.8512	28.8512	0.623193	0.0216002	2	28.7036	28.7036	NaN	NaN	1	29.0904	29.0904	NaN	NaN	1	29.0214	29.0214	NaN	NaN	1	28.4468	NaN
P06576	ATP synthase subunit beta, mitochondrial	ATP5B	31.9383	32.0624	0.342182	0.0107139	3	31.7051	31.7388	0.147017	0.00463702	3	31.7168	31.5998	0.319583	0.0100761	3	31.5413	31.5516	0.337435	0.0106982	3	31.6678	31.7295	0.148838	0.00469996	3	31.7335	31.5752	0.284312	0.00895937	3	31.3582	31.3996	0.141766	0.00452084	3	31.453	31.3121	0.591293	0.0187993	3	31.3413	31.2054	0.393484	0.0125548	3	32.0624	31.8323
P06681	Complement C2;Complement C2b fragment;Complement C2a fragment	C2	29.2786	29.2786	0.573065	0.0195728	2	29.1109	29.4378	0.712668	0.0244812	3	28.2881	28.2881	0.795553	0.0281233	2	30.082	30.082	1.10226	0.036642	2	30.7085	30.7085	NaN	NaN	1	29.3435	29.3435	0.167653	0.00571345	2	30.1271	30.1271	1.36112	0.0451792	2	32.6212	32.6212	NaN	NaN	1	31.465	31.465	1.97218	0.0626786	2	28.8734	28.2934
P06703	Protein S100-A6	S100A6	26.8307	26.8307	0.622832	0.0232134	2	26.6217	26.8427	0.401254	0.0150725	3	27.7012	27.8464	0.863331	0.0311658	3	28.159	28.1381	1.32658	0.0471102	3	28.4859	28.4859	0.404193	0.0141892	2	27.0674	27.5302	1.28893	0.0476192	3	26.3694	26.3694	1.74508	0.0661784	2	25.564	25.564	0.568326	0.0222315	2	26.9638	26.3734	1.93763	0.0718606	3	27.2711	26.8638
P06727	Apolipoprotein A-IV	APOA4	31.018	30.9351	0.434508	0.0140082	3	30.2003	30.4502	0.533729	0.017673	3	30.8273	30.5629	0.56969	0.0184801	3	31.8651	32.1246	0.453215	0.0142229	3	29.5206	29.994	2.8015	0.0948996	3	29.0072	28.6086	1.80731	0.0623056	3	31.2673	32.0649	1.82823	0.0584708	3	28.8069	29.1511	0.863641	0.0299804	3	28.7976	28.5609	2.72594	0.0946584	3	30.631	29.5875
P06730	Eukaryotic translation initiation factor 4E	EIF4E	28.0971	28.1771	0.301597	0.0107341	3	28.0458	27.9888	0.52548	0.0187365	3	27.9592	27.9759	0.0621742	0.00222375	3	28.0374	28.1231	0.62754	0.0223822	3	28.2674	28.1551	0.58527	0.0207047	3	28.4274	28.6202	1.00433	0.0353296	3	27.5579	27.5422	0.0276068	0.00100178	3	27.6045	27.5981	0.184051	0.00666742	3	27.6559	27.6347	0.35673	0.0128989	3	27.7636	27.9888
P06733	Alpha-enolase	ENO1	32.432	32.4248	0.132948	0.00409929	3	32.2776	32.2453	0.152077	0.00471155	3	32.1813	32.1679	0.0483842	0.00150349	3	32.4536	32.4531	0.0664171	0.00204653	3	32.5053	32.5631	0.12532	0.00385537	3	32.361	32.438	0.146072	0.00451383	3	32.4949	32.4618	0.115741	0.00356182	3	32.5068	32.5731	0.140816	0.0043319	3	32.3608	32.422	0.15556	0.00480704	3	32.4248	32.2453
P06737	Glycogen phosphorylase, liver form	PYGL	28.6381	28.9021	0.480271	0.0167704	3	29.3968	29.615	0.402602	0.0136955	3	28.6257	28.5958	0.200036	0.006988	3	28.2864	28.3506	0.151858	0.00536858	3	28.4023	28.7017	1.38632	0.0488103	3	28.5421	28.3704	0.498648	0.0174706	3	28.6481	28.57	0.226059	0.0078909	3	30.1862	30.1862	0.326354	0.0108114	2	28.8294	28.8937	0.368712	0.0127894	3	28.0837	28.9322
P06744	Glucose-6-phosphate isomerase	GPI	30.3645	30.2795	0.254057	0.00836691	3	30.1374	30.0893	0.130872	0.00434252	3	30.3277	30.386	0.161927	0.00533924	3	29.9104	29.8568	0.207331	0.00693174	3	30.3171	30.3028	0.223044	0.00735704	3	30.046	30.072	0.289371	0.00963094	3	30.0426	30.0003	0.178327	0.00593578	3	30.1217	30.2325	0.379678	0.0126048	3	30.1464	30.1816	0.0798167	0.00264763	3	30.6501	30.0893
P06748	Nucleophosmin	NPM1	31.9946	32.0672	0.13848	0.00432823	3	31.9057	31.873	0.084534	0.00264949	3	31.8635	31.8516	0.114888	0.00360564	3	32.3678	32.2836	0.267452	0.00826289	3	31.8217	31.8752	0.160668	0.00504903	3	32.3132	32.3285	0.148592	0.00459849	3	32.101	31.9833	0.319908	0.00996566	3	31.8514	31.9988	0.349929	0.0109863	3	32.0157	32.1457	0.370558	0.0115742	3	32.0672	31.8425
P06753	Tropomyosin alpha-3 chain	TPM3	29.5078	29.5078	0.169192	0.0057338	2	27.825	27.825	0.622943	0.0223879	2	29.1445	29.1445	0.243483	0.00835436	2	30.1833	30.0947	0.355862	0.01179	3	28.9781	28.9781	NaN	NaN	1	29.1983	29.1983	0.902972	0.0309255	2	29.5438	29.516	0.271714	0.00919697	3	29.3918	29.3492	0.277597	0.00944469	3	28.917	28.8682	0.265913	0.00919573	3	NaN	27.3845
P07099	Epoxide hydrolase 1	EPHX1	28.171	28.171	0.120439	0.00427528	2	27.9841	27.9841	2.0133	0.0719447	2	28.7883	28.7883	0.411232	0.0142847	2	27.5188	27.5188	NaN	NaN	1	28.5671	28.5671	NaN	NaN	1	27.9425	27.9425	NaN	NaN	1	NaN	NaN	NaN	NaN	0	27.9783	27.9783	1.12094	0.0400646	2	28.2562	28.2562	NaN	NaN	1	28.2562	NaN
P07108	Acyl-CoA-binding protein	DBI	26.665	26.665	0.688519	0.025821	2	26.9052	26.9052	NaN	NaN	1	26.9084	26.9084	0.257591	0.00957288	2	NaN	NaN	NaN	NaN	0	27.3757	27.3757	NaN	NaN	1	27.5446	27.5446	NaN	NaN	1	26.5402	26.5402	NaN	NaN	1	27.2726	27.2726	NaN	NaN	1	NaN	NaN	NaN	NaN	0	26.1782	26.9052
P07148	Fatty acid-binding protein, liver	FABP1	27.3296	27.3296	0.788768	0.0288612	2	28.0735	28.0735	0.202774	0.00722297	2	28.0617	28.0635	0.0416815	0.00148535	3	NaN	NaN	NaN	NaN	0	28.1466	28.3777	0.460416	0.0163578	3	27.8105	27.8105	0.650086	0.0233755	2	28.3579	28.3579	NaN	NaN	1	28.127	28.1047	0.415295	0.014765	3	27.7446	27.7446	NaN	NaN	1	NaN	28.2169
P07195	L-lactate dehydrogenase B chain	LDHB	32.0287	32.0678	0.0807169	0.00252014	3	31.6188	31.5756	0.408021	0.0129044	3	31.9926	31.9856	0.147529	0.00461136	3	32.0219	32.0455	0.31487	0.00983296	3	31.9419	31.9004	0.171482	0.00536856	3	32.2105	32.3004	0.18	0.00558824	3	32.196	32.2505	0.328274	0.0101961	3	32.0111	32.0244	0.243014	0.00759156	3	32.2108	32.2731	0.164482	0.00510643	3	32.0824	32.0466
P07196	Neurofilament light polypeptide	NEFL	27.4371	27.4371	NaN	NaN	1	27.8157	27.8157	NaN	NaN	1	NaN	NaN	NaN	NaN	0	NaN	NaN	NaN	NaN	0	28.1571	28.1571	0.453658	0.0161116	2	NaN	NaN	NaN	NaN	0	NaN	NaN	NaN	NaN	0	NaN	NaN	NaN	NaN	0	NaN	NaN	NaN	NaN	0	NaN	27.8157
P07197	Neurofilament medium polypeptide	NEFM	27.4371	27.4371	NaN	NaN	1	27.8157	27.8157	NaN	NaN	1	NaN	NaN	NaN	NaN	0	NaN	NaN	NaN	NaN	0	28.4305	28.4305	0.0670425	0.00235812	2	NaN	NaN	NaN	NaN	0	NaN	NaN	NaN	NaN	0	NaN	NaN	NaN	NaN	0	NaN	NaN	NaN	NaN	0	NaN	27.8157
P07203	Glutathione peroxidase 1	GPX1	27.0568	27.0568	NaN	NaN	1	NaN	NaN	NaN	NaN	0	28.1537	28.1537	NaN	NaN	1	NaN	NaN	NaN	NaN	0	29.0365	29.0365	0.817737	0.0281623	2	29.6533	29.6533	NaN	NaN	1	NaN	NaN	NaN	NaN	0	NaN	NaN	NaN	NaN	0	NaN	NaN	NaN	NaN	0	27.0568	NaN
P07225	Vitamin K-dependent protein S	PROS1	32.2876	32.6801	0.761352	0.0235803	3	32.7778	32.9077	0.262037	0.00799433	3	32.0589	32.0551	0.301334	0.00939938	3	32.7242	32.878	0.779014	0.0238054	3	32.3545	32.1785	0.428973	0.0132585	3	32.6108	32.7735	0.503662	0.0154447	3	33.1945	33.0667	0.70981	0.0213833	3	32.3154	32.694	0.673134	0.0208301	3	32.3458	32.5267	1.25311	0.0387411	3	32.7727	32.4762
P07237	Protein disulfide-isomerase	P4HB	30.6628	30.7269	0.143255	0.00467197	3	30.8346	30.8326	0.0417404	0.00135369	3	30.7009	30.619	0.189567	0.00617463	3	30.7893	30.8472	0.132799	0.00431316	3	30.912	30.9354	0.0722644	0.00233775	3	30.772	30.8439	0.164765	0.00535439	3	30.8219	30.8259	0.15354	0.00498151	3	30.8674	30.7246	0.314867	0.0102006	3	30.7588	30.7423	0.0806235	0.00262115	3	30.4987	30.794
P07311	Acylphosphatase-1	ACYP1	26.3026	26.3026	NaN	NaN	1	26.5156	26.5156	0.336115	0.0126761	2	26.9759	26.9759	NaN	NaN	1	NaN	NaN	NaN	NaN	0	27.3884	27.3884	NaN	NaN	1	NaN	NaN	NaN	NaN	0	NaN	NaN	NaN	NaN	0	NaN	NaN	NaN	NaN	0	NaN	NaN	NaN	NaN	0	26.3026	26.2779
P07339	Cathepsin D;Cathepsin D light chain;Cathepsin D heavy chain	CTSD	27.9366	27.9226	0.215989	0.00773141	3	28.4175	28.3765	0.479897	0.0168874	3	27.8898	27.8926	0.125602	0.00450351	3	28.246	28.2614	0.0724915	0.00256644	3	28.0011	28.118	0.220244	0.00786556	3	28.0826	27.9998	0.352404	0.0125488	3	28.2779	28.1718	0.272133	0.00962353	3	28.4707	28.3393	0.483592	0.0169856	3	28.228	28.2655	0.293511	0.0103979	3	27.9226	27.9594
P07355	Annexin A2;Putative annexin A2-like protein	ANXA2	30.9441	30.8731	0.434673	0.014047	3	30.5887	30.4854	0.213304	0.00697328	3	30.6681	30.6365	0.208266	0.00679094	3	30.8037	30.9817	0.435599	0.0141411	3	30.8826	31.0111	0.223257	0.00722922	3	30.9418	30.968	0.351274	0.0113527	3	30.6022	30.5858	0.336877	0.0110083	3	30.5353	30.555	0.0580113	0.00189981	3	30.9174	30.903	0.132738	0.00429332	3	30.8731	30.4468
P07357	Complement component C8 alpha chain	C8A	30.887	31.2144	1.37227	0.0444286	3	31.8537	31.4014	0.940295	0.0295192	3	29.8305	29.8305	0.567433	0.0190219	2	32.2523	32.4331	0.496217	0.0153855	3	30.5104	30.5296	0.273528	0.00896506	3	31.423	31.7331	0.814029	0.0259055	3	31.3073	30.8507	1.35749	0.0433601	3	30.8292	31.0981	0.764409	0.024795	3	31.5569	31.8777	1.32849	0.0420983	3	32.0661	31.4014
P07358	Complement component C8 beta chain	C8B	30.2327	30.1306	0.178683	0.00591024	3	30.3834	30.3834	0.51959	0.0171011	2	29.4749	29.2029	0.846391	0.0287157	3	30.8436	31.2531	0.955026	0.0309635	3	29.8575	29.8447	0.466184	0.0156136	3	30.2386	29.8424	0.898668	0.0297193	3	31.0822	30.5801	1.11167	0.0357656	3	30.8164	30.601	0.427671	0.013878	3	30.3894	30.5611	1.67407	0.0550875	3	30.4391	30.7508
P07360	Complement component C8 gamma chain	C8G	30.8558	30.8558	0.513957	0.0166567	2	31.1298	30.9809	0.444756	0.0142871	3	30.3261	30.3648	0.343802	0.0113368	3	31.2885	31.7493	1.06097	0.0339091	3	30.4148	30.563	0.353096	0.0116093	3	30.8928	30.5957	0.710475	0.0229981	3	31.5014	31.6492	0.912787	0.0289761	3	30.805	30.9166	0.22738	0.00738128	3	31.6308	31.5259	1.28032	0.0404772	3	31.2192	30.7787
P07384	Calpain-1 catalytic subunit	CAPN1	27.7767	27.9454	0.332972	0.0119875	3	27.8287	27.7789	0.380544	0.0136745	3	28.0499	27.9939	0.277947	0.00990905	3	27.7944	27.7944	0.476524	0.0171446	2	28.0745	28.0745	0.363392	0.0129439	2	27.5386	27.6564	0.35	0.0127094	3	NaN	NaN	NaN	NaN	0	27.3862	27.2748	0.29243	0.010678	3	27.5868	27.5868	0.0548003	0.00198647	2	27.3931	28.2316
P07437	Tubulin beta chain	TUBB	31.8603	31.9459	0.17624	0.00553167	3	31.6951	31.5628	0.239833	0.00756686	3	31.6203	31.6285	0.188029	0.00594646	3	32.0839	32.1501	0.189055	0.00589252	3	32.0671	32.0771	0.301213	0.00939319	3	31.9933	32.1046	0.21497	0.00671922	3	32.4171	32.3623	0.195388	0.0060273	3	31.995	32.3082	0.670217	0.0209475	3	32.4734	32.4875	0.031017	0.000955151	3	31.9773	31.5506
P07602	Prosaposin;Saposin-A;Saposin-B-Val;Saposin-B;Saposin-C;Saposin-D	PSAP	29.6182	29.3547	0.531347	0.0179399	3	29.7553	29.7553	0.312681	0.0105084	2	30.0493	30.2544	0.36733	0.0122242	3	29.5297	29.5297	0.534793	0.0181103	2	29.8305	29.7024	1.18375	0.0396823	3	28.8717	28.6594	1.45462	0.0503823	3	29.7679	29.7679	0.596802	0.0200485	2	29.8767	29.8767	0.447462	0.014977	2	29.9164	30.4014	1.20206	0.0401805	3	29.27	29.9764
P07686	Beta-hexosaminidase subunit beta;Beta-hexosaminidase subunit beta chain B;Beta-hexosaminidase subunit beta chain A	HEXB	26.7362	27.5198	1.67523	0.0626575	3	27.7688	27.491	0.919299	0.0331054	3	27.6105	27.656	0.171386	0.00620725	3	27.0662	27.0975	0.479498	0.0177157	3	27.7818	27.7818	0.448372	0.0161391	2	26.7852	26.9754	0.974098	0.036367	3	NaN	NaN	NaN	NaN	0	26.9194	27.0632	0.323385	0.0120131	3	26.8264	26.8264	NaN	NaN	1	27.5198	28.795
P07737	Profilin-1	PFN1	31.8405	31.914	0.326607	0.0102576	3	31.8401	31.7954	0.111644	0.0035064	3	31.8173	31.776	0.0783691	0.0024631	3	32.0383	31.9725	0.274506	0.00856807	3	31.2901	31.6777	0.803125	0.025667	3	32.0483	32.302	0.461511	0.0144005	3	32.0835	32.04	0.122606	0.00382147	3	31.5438	31.326	0.480921	0.0152462	3	32.0694	32.0721	0.02126	0.000662936	3	31.4834	31.9671
P07741	Adenine phosphoribosyltransferase	APRT	NaN	NaN	NaN	NaN	0	NaN	NaN	NaN	NaN	0	26.3276	26.3276	NaN	NaN	1	NaN	NaN	NaN	NaN	0	28.8395	28.8395	NaN	NaN	1	NaN	NaN	NaN	NaN	0	NaN	NaN	NaN	NaN	0	NaN	NaN	NaN	NaN	0	NaN	NaN	NaN	NaN	0	NaN	NaN
P07814	Bifunctional glutamate/proline--tRNA ligase;Glutamate--tRNA ligase;Proline--tRNA ligase	EPRS	27.8896	28.0866	0.717058	0.0257106	3	27.9297	27.875	0.693401	0.0248266	3	29.0352	28.9994	0.75449	0.0259854	3	27.7949	27.7944	0.271569	0.00977045	3	28.0362	28.3992	0.9557	0.0340881	3	28.4845	28.5712	0.703373	0.0246932	3	28.5146	28.5146	0.723341	0.0253674	2	27.4218	27.7897	0.828615	0.0302174	3	27.7514	27.7514	0.195877	0.00705828	2	28.4875	28.6489
P07858	Cathepsin B;Cathepsin B light chain;Cathepsin B heavy chain	CTSB	NaN	NaN	NaN	NaN	0	27.0062	27.0062	NaN	NaN	1	26.8158	26.8076	0.118089	0.00440372	3	26.8942	26.8942	NaN	NaN	1	27.2212	27.2212	NaN	NaN	1	NaN	NaN	NaN	NaN	0	NaN	NaN	NaN	NaN	0	NaN	NaN	NaN	NaN	0	27.3395	27.3395	NaN	NaN	1	NaN	27.0062
P07900	Heat shock protein HSP 90-alpha	HSP90AA1	33.1214	33.1745	0.118289	0.00357138	3	33.0743	33.072	0.0232806	0.000703887	3	33.0597	33.0251	0.062656	0.00189524	3	33.0552	33.0108	0.108882	0.00329395	3	33.2323	33.1923	0.275888	0.00830181	3	33.336	33.3398	0.0571019	0.00171292	3	33.2923	33.2636	0.234104	0.0070318	3	33.0299	33.411	0.681989	0.0206476	3	33.366	33.3955	0.111916	0.0033542	3	33.2038	33.072
P07910	Heterogeneous nuclear ribonucleoproteins C1/C2	HNRNPC	31.6816	31.7383	0.178571	0.00563644	3	31.7422	31.868	0.245117	0.00772213	3	31.0436	31.436	0.890204	0.0286759	3	31.1697	31.4109	0.720627	0.0231195	3	31.5031	31.511	0.0938852	0.00298019	3	31.6465	31.6275	0.158882	0.00502051	3	31.5215	31.6041	0.18966	0.00601687	3	31.3774	31.5538	0.631132	0.0201142	3	31.1547	31.5051	0.895546	0.0287451	3	31.4815	31.8989
P07947	Tyrosine-protein kinase Yes	YES1	24.6719	24.6719	NaN	NaN	1	NaN	NaN	NaN	NaN	0	NaN	NaN	NaN	NaN	0	26.5539	26.5539	NaN	NaN	1	NaN	NaN	NaN	NaN	0	26.1244	26.1244	0.787233	0.030134	2	26.2923	26.2923	0.0942444	0.00358448	2	26.0184	25.9278	0.307473	0.0118175	3	25.8838	26.4665	1.16297	0.0449303	3	24.6719	NaN
P07948	Tyrosine-protein kinase Lyn	LYN	24.6719	24.6719	NaN	NaN	1	NaN	NaN	NaN	NaN	0	NaN	NaN	NaN	NaN	0	26.5539	26.5539	NaN	NaN	1	NaN	NaN	NaN	NaN	0	26.1244	26.1244	0.787233	0.030134	2	26.2923	26.2923	0.0942444	0.00358448	2	26.0069	25.9278	0.321997	0.0123812	3	25.8838	26.4665	1.16297	0.0449303	3	24.6719	NaN
P07954	Fumarate hydratase, mitochondrial	FH	27.3166	27.3166	0.729935	0.0267213	2	26.8349	26.8349	0.256945	0.00957502	2	27.2701	27.2701	0.210331	0.00771287	2	27.7488	27.7488	0.622825	0.0224451	2	27.7123	27.7123	0.76106	0.0274629	2	28.1754	28.1754	0.00696603	0.000247238	2	27.7791	27.904	0.227236	0.0081801	3	27.6645	27.5113	0.530672	0.0191824	3	26.9521	26.7742	0.610704	0.0226589	3	27.8327	27.0166
P07992	DNA excision repair protein ERCC-1	ERCC1	NaN	NaN	NaN	NaN	0	NaN	NaN	NaN	NaN	0	24.2501	24.2501	NaN	NaN	1	NaN	NaN	NaN	NaN	0	NaN	NaN	NaN	NaN	0	NaN	NaN	NaN	NaN	0	NaN	NaN	NaN	NaN	0	NaN	NaN	NaN	NaN	0	NaN	NaN	NaN	NaN	0	NaN	NaN
P08133	Annexin A6	ANXA6	27.9941	27.7352	0.487932	0.0174298	3	28.082	28.082	0.153272	0.005458	2	27.7641	27.8658	0.235288	0.00847455	3	27.9808	27.9808	NaN	NaN	1	27.8088	27.9841	0.514566	0.0185037	3	27.7763	28.1787	0.822523	0.0296124	3	NaN	NaN	NaN	NaN	0	28.4236	28.4236	NaN	NaN	1	27.7031	27.598	0.37121	0.0133996	3	27.7352	28.1904
P08195	4F2 cell-surface antigen heavy chain	SLC3A2	29.2107	29.3081	0.218307	0.00747352	3	28.8932	28.8211	0.475814	0.016468	3	29.1336	29.1437	0.0394855	0.00135532	3	28.7204	28.7859	0.552991	0.0192543	3	29.0622	28.866	0.527257	0.0181424	3	29.0254	28.9123	0.306526	0.0105606	3	27.555	27.1419	0.946923	0.0343648	3	28.8374	28.8374	0.254908	0.00883951	2	29.0263	28.9721	0.200416	0.00690463	3	29.3081	29.401
P08237	ATP-dependent 6-phosphofructokinase, muscle type	PFKM	26.484	26.6017	0.327102	0.0123509	3	26.5415	26.5415	0.00415669	0.000156611	2	26.408	26.408	0.175166	0.00663308	2	NaN	NaN	NaN	NaN	0	26.4955	26.4955	0.212521	0.00802102	2	25.9014	25.9014	0.324587	0.0125316	2	NaN	NaN	NaN	NaN	0	NaN	NaN	NaN	NaN	0	26.922	26.922	NaN	NaN	1	26.1143	26.5386
P08238	Heat shock protein HSP 90-beta	HSP90AB1	33.2347	33.1386	0.202237	0.00608511	3	33.0767	33.0794	0.153176	0.00463094	3	33.019	33.0565	0.0967425	0.0029299	3	33.1312	33.1387	0.18125	0.00547067	3	33.2891	33.2126	0.2289	0.00687613	3	33.4614	33.5043	0.173502	0.00518513	3	33.3084	33.3511	0.121835	0.0036578	3	33.0442	33.4387	0.76791	0.0232389	3	33.3192	33.4002	0.14574	0.00437404	3	33.1386	32.9222
P08240	Signal recognition particle receptor subunit alpha	SRPR	NaN	NaN	NaN	NaN	0	27.9186	27.9186	NaN	NaN	1	NaN	NaN	NaN	NaN	0	NaN	NaN	NaN	NaN	0	27.6813	27.6813	NaN	NaN	1	NaN	NaN	NaN	NaN	0	NaN	NaN	NaN	NaN	0	NaN	NaN	NaN	NaN	0	NaN	NaN	NaN	NaN	0	NaN	NaN
P08243	Asparagine synthetase [glutamine-hydrolyzing]	ASNS	28.7023	28.7749	0.249596	0.00869601	3	29.0023	28.9387	0.489888	0.0168914	3	28.7763	28.8141	0.31354	0.0108958	3	29.0516	29.0253	0.231238	0.00795954	3	28.7895	28.7815	0.149231	0.00518353	3	28.9731	28.6698	0.53066	0.0183156	3	28.9889	29.2246	0.84878	0.0292795	3	29.3791	29.3872	0.0252022	0.000857827	3	29.1157	29.1904	0.137057	0.00470731	3	28.9076	28.5473
P08397	Porphobilinogen deaminase	HMBS	NaN	NaN	NaN	NaN	0	26.0744	26.0744	NaN	NaN	1	25.2973	25.2973	NaN	NaN	1	NaN	NaN	NaN	NaN	0	NaN	NaN	NaN	NaN	0	NaN	NaN	NaN	NaN	0	NaN	NaN	NaN	NaN	0	25.7312	25.7312	NaN	NaN	1	NaN	NaN	NaN	NaN	0	NaN	26.0744
P08473	Neprilysin	MME	24.0604	24.0604	NaN	NaN	1	25.2427	25.2427	NaN	NaN	1	25.5879	25.5879	NaN	NaN	1	25.649	25.649	NaN	NaN	1	NaN	NaN	NaN	NaN	0	25.0446	25.0446	NaN	NaN	1	26.3645	26.3645	NaN	NaN	1	NaN	NaN	NaN	NaN	0	25.8602	25.8602	NaN	NaN	1	24.0604	NaN
P08514	Integrin alpha-IIb;Integrin alpha-IIb heavy chain;Integrin alpha-IIb light chain, form 1;Integrin alpha-IIb light chain, form 2	ITGA2B	27.1949	27.1949	0.316132	0.0116247	2	NaN	NaN	NaN	NaN	0	NaN	NaN	NaN	NaN	0	30.2536	30.2536	NaN	NaN	1	NaN	NaN	NaN	NaN	0	NaN	NaN	NaN	NaN	0	29.5449	29.5449	NaN	NaN	1	NaN	NaN	NaN	NaN	0	29.043	29.043	NaN	NaN	1	26.9714	NaN
P08519	Apolipoprotein(a)	LPA	31.3367	31.3367	NaN	NaN	1	NaN	NaN	NaN	NaN	0	NaN	NaN	NaN	NaN	0	NaN	NaN	NaN	NaN	0	31.6266	31.6266	NaN	NaN	1	26.4528	26.4528	NaN	NaN	1	NaN	NaN	NaN	NaN	0	29.2434	29.2434	NaN	NaN	1	NaN	NaN	NaN	NaN	0	NaN	NaN
P08559	Pyruvate dehydrogenase E1 component subunit alpha, somatic form, mitochondrial	PDHA1	NaN	NaN	NaN	NaN	0	24.7061	24.7061	NaN	NaN	1	24.8226	24.8226	NaN	NaN	1	25.0158	25.0158	NaN	NaN	1	NaN	NaN	NaN	NaN	0	NaN	NaN	NaN	NaN	0	24.0893	24.0893	NaN	NaN	1	24.6258	24.6258	0.0782407	0.00317719	2	23.6527	23.6527	0.206414	0.00872688	2	NaN	24.7061
P08571	Monocyte differentiation antigen CD14;Monocyte differentiation antigen CD14, urinary form;Monocyte differentiation antigen CD14, membrane-bound form	CD14	NaN	NaN	NaN	NaN	0	NaN	NaN	NaN	NaN	0	26.697	26.697	NaN	NaN	1	28.2461	28.2461	1.79703	0.0636203	2	29.4104	29.4104	NaN	NaN	1	28.0013	28.0013	NaN	NaN	1	NaN	NaN	NaN	NaN	0	NaN	NaN	NaN	NaN	0	NaN	NaN	NaN	NaN	0	NaN	NaN
P08574	Cytochrome c1, heme protein, mitochondrial	CYC1	27.7864	27.7864	0.305486	0.0109941	2	27.6294	27.6294	NaN	NaN	1	27.7873	27.7873	0.174841	0.00629212	2	28.957	28.957	NaN	NaN	1	28.2505	28.2505	0.0535663	0.00189612	2	26.6587	26.6587	NaN	NaN	1	28.2684	28.2684	0.167133	0.00591238	2	28.0568	28.0379	0.235461	0.00839229	3	27.8588	28.03	0.546019	0.0195995	3	27.5704	NaN
P08579	U2 small nuclear ribonucleoprotein B	SNRPB2	26.6455	26.6455	NaN	NaN	1	26.4138	26.4138	NaN	NaN	1	26.8256	26.8256	0.728383	0.0271525	2	NaN	NaN	NaN	NaN	0	26.903	26.903	0.375965	0.0139748	2	26.9314	26.9314	0.890183	0.0330537	2	NaN	NaN	NaN	NaN	0	26.257	26.257	NaN	NaN	1	26.3317	26.3317	NaN	NaN	1	NaN	26.4138
P08603	Complement factor H	CFH	33.1848	33.3193	0.515454	0.0155328	3	33.2628	33.2672	0.176805	0.00531539	3	32.9618	32.8854	0.237009	0.0071904	3	34.3218	34.3055	0.0666238	0.00194115	3	32.8402	32.3082	1.1108	0.0338243	3	33.229	33.5693	0.614835	0.018503	3	33.7658	33.3825	0.951287	0.0281731	3	33.1884	33.0994	0.419907	0.0126522	3	32.8605	33.8796	2.66327	0.0810478	3	33.3193	33.4374
P08621	U1 small nuclear ribonucleoprotein 70 kDa	SNRNP70	NaN	NaN	NaN	NaN	0	NaN	NaN	NaN	NaN	0	27.3154	27.3154	NaN	NaN	1	27.4722	27.4722	0.984085	0.0358212	2	28.0575	28.0575	0.103998	0.00370662	2	NaN	NaN	NaN	NaN	0	26.7442	26.7442	0.373003	0.0139471	2	27.3342	27.3382	0.0549541	0.00201045	3	NaN	NaN	NaN	NaN	0	NaN	NaN
P08637	Low affinity immunoglobulin gamma Fc region receptor III-A	FCGR3A	NaN	NaN	NaN	NaN	0	27.4626	27.4626	0.653019	0.0237784	2	27.2232	27.2232	0.229356	0.008425	2	NaN	NaN	NaN	NaN	0	NaN	NaN	NaN	NaN	0	NaN	NaN	NaN	NaN	0	NaN	NaN	NaN	NaN	0	NaN	NaN	NaN	NaN	0	NaN	NaN	NaN	NaN	0	NaN	27.9244
P08670	Vimentin	VIM	31.2224	31.2915	0.301139	0.00964496	3	31.4488	31.4849	0.1324	0.00421004	3	31.3437	31.4242	0.202488	0.00646024	3	31.1454	31.1413	0.178562	0.00573318	3	31.3743	31.4096	0.0679584	0.00216605	3	31.5345	31.7125	0.638993	0.0202633	3	31.1831	31.1322	0.308063	0.00987915	3	31.3984	31.4021	0.19425	0.00618662	3	31.3699	31.3134	0.310849	0.00990915	3	30.8927	31.5593
P08697	Alpha-2-antiplasmin	SERPINF2	29.7648	29.6833	0.516174	0.0173418	3	31.0065	30.7539	1.16276	0.0375006	3	29.0707	29.2117	0.879224	0.0302443	3	32.3822	32.652	0.800581	0.0247229	3	29.6296	29.0899	2.45929	0.0830011	3	29.7016	30.6407	1.72523	0.0580855	3	29.525	28.9707	2.08845	0.0707348	3	30.5848	30.4788	0.277626	0.00907725	3	31.8685	31.8685	1.67894	0.0526836	2	29.6833	32.2748
P08708	40S ribosomal protein S17	RPS17	29.3108	29.5741	0.588781	0.0200875	3	29.0207	29.0284	0.405776	0.0139823	3	29.2262	29.3318	0.331294	0.0113355	3	29.2143	29.9385	1.57314	0.0538482	3	28.3095	28.3283	0.938319	0.033145	3	29.7748	29.8495	0.68202	0.0229059	3	29.3988	29.3998	0.00933423	0.000317503	3	29.5197	29.5146	0.714025	0.0241881	3	28.9403	29.4875	1.50648	0.0520547	3	28.6363	29.4226
P08727	Keratin, type I cytoskeletal 19	KRT19	33.0502	33.0532	0.414288	0.0125351	3	33.0038	32.9366	0.383302	0.0116139	3	32.4712	32.2679	0.505786	0.0155764	3	32.679	32.6491	0.256126	0.00783762	3	32.4446	32.4291	0.139614	0.00430316	3	32.7243	32.6726	0.484423	0.0148032	3	32.9066	32.9544	0.296155	0.00899984	3	32.6251	32.5194	0.588291	0.0180318	3	32.7654	32.7957	0.343882	0.0104953	3	33.0532	32.9366
P08754	Guanine nucleotide-binding protein G(k) subunit alpha	GNAI3	NaN	NaN	NaN	NaN	0	28.5526	28.5526	0.505888	0.0177177	2	28.516	28.516	0.462372	0.0162144	2	28.6755	28.4712	0.929235	0.0324052	3	NaN	NaN	NaN	NaN	0	28.5913	28.5913	NaN	NaN	1	27.4075	27.4075	NaN	NaN	1	28.398	28.398	NaN	NaN	1	27.8424	27.8424	NaN	NaN	1	NaN	28.1949
P08758	Annexin A5	ANXA5	30.5598	30.4905	0.644125	0.0210775	3	31.245	31.2795	0.264133	0.00845362	3	30.8419	30.846	0.191711	0.00621592	3	30.8713	30.6638	0.559493	0.0181234	3	31.1443	30.9571	0.484024	0.0155413	3	31.2136	31.4356	0.506818	0.0162371	3	30.7506	30.5609	0.358429	0.011656	3	31.0053	30.9254	0.220325	0.00710604	3	31.2909	31.2785	0.693411	0.0221601	3	29.9531	30.9653
P08865	40S ribosomal protein SA	RPSA	29.2683	29.2097	0.568053	0.0194085	3	28.97	29.1205	0.378912	0.0130795	3	29.0144	28.8966	0.213548	0.00736004	3	28.965	28.8192	0.256689	0.00886204	3	29.6016	29.8975	0.526316	0.01778	3	28.5524	28.1535	0.804576	0.0281789	3	28.2465	28.2678	0.459277	0.0162596	3	29.2687	29.3028	0.242065	0.00827044	3	28.5452	28.4497	0.258699	0.00906278	3	28.7318	29.1205
P09001	39S ribosomal protein L3, mitochondrial	MRPL3	NaN	NaN	NaN	NaN	0	25.3436	25.3436	0.616432	0.024323	2	NaN	NaN	NaN	NaN	0	NaN	NaN	NaN	NaN	0	NaN	NaN	NaN	NaN	0	NaN	NaN	NaN	NaN	0	NaN	NaN	NaN	NaN	0	NaN	NaN	NaN	NaN	0	NaN	NaN	NaN	NaN	0	NaN	NaN
P09012	U1 small nuclear ribonucleoprotein A	SNRPA	NaN	NaN	NaN	NaN	0	27.1658	27.1658	0.237954	0.00875931	2	27.3886	27.3886	0.337519	0.0123233	2	NaN	NaN	NaN	NaN	0	27.7156	27.7093	0.410182	0.0147997	3	27.7293	27.7293	1.04376	0.0376409	2	NaN	NaN	NaN	NaN	0	NaN	NaN	NaN	NaN	0	26.944	26.944	NaN	NaN	1	NaN	26.9976
P09104	Gamma-enolase	ENO2	28.1554	28.1722	0.272767	0.0096879	3	27.059	27.059	NaN	NaN	1	27.3871	27.2676	0.344107	0.0125646	3	28.5422	28.5422	0.760285	0.0266372	2	27.7474	27.7474	NaN	NaN	1	NaN	NaN	NaN	NaN	0	28.2705	28.2705	0.509571	0.0180248	2	28.3944	28.3944	0.169208	0.0059592	2	27.8295	27.8295	NaN	NaN	1	28.4194	27.059
P09110	3-ketoacyl-CoA thiolase, peroxisomal	ACAA1	25.6742	25.6742	0.521733	0.0203213	2	26.1772	26.1772	0.140423	0.00536431	2	25.2079	25.2079	NaN	NaN	1	NaN	NaN	NaN	NaN	0	25.9604	25.9604	0.02528	0.000973792	2	25.3703	25.3703	NaN	NaN	1	NaN	NaN	NaN	NaN	0	25.5816	25.5816	0.323442	0.0126435	2	NaN	NaN	NaN	NaN	0	25.3053	26.2765
P09211	Glutathione S-transferase P	GSTP1	28.7951	28.9259	0.388909	0.0135061	3	29.4961	29.5907	0.237471	0.0080509	3	29.1168	29.0275	0.561037	0.0192685	3	30.5156	30.5156	NaN	NaN	1	29.0241	29.0241	0.233057	0.00802976	2	29.1868	28.9758	0.537998	0.0184329	3	29.8783	29.8783	0.511251	0.0171111	2	29.8054	29.9621	0.847239	0.0284257	3	29.5167	29.4637	0.29761	0.0100828	3	28.3576	29.226
P09234	U1 small nuclear ribonucleoprotein C	SNRPC	28.9626	28.9626	0.238076	0.00822015	2	27.9039	28.0963	0.736123	0.0263807	3	28.8124	28.8124	0.288097	0.00999907	2	29.3057	29.3057	0.00107626	3.67254e-05	2	28.9032	28.9032	0.562366	0.0194569	2	27.7336	27.7336	1.12116	0.0404261	2	28.0557	28.0557	NaN	NaN	1	NaN	NaN	NaN	NaN	0	NaN	NaN	NaN	NaN	0	29.1309	27.0906
P09327	Villin-1	VIL1	NaN	NaN	NaN	NaN	0	31.3779	31.3779	NaN	NaN	1	26.8344	26.8344	NaN	NaN	1	NaN	NaN	NaN	NaN	0	27.4703	27.4703	NaN	NaN	1	NaN	NaN	NaN	NaN	0	26.3325	26.3325	NaN	NaN	1	NaN	NaN	NaN	NaN	0	29.3368	29.3368	NaN	NaN	1	NaN	NaN
P09382	Galectin-1	LGALS1	29.9336	29.9336	0.13591	0.00454037	2	29.7371	29.7371	0.165523	0.00556621	2	29.9839	30.1	0.207971	0.00693607	3	30.0865	29.9851	0.304644	0.0101256	3	30.3509	30.4884	0.250193	0.00824335	3	30.4033	30.4087	0.0238722	0.000785183	3	30.0411	30.1231	0.342115	0.0113883	3	29.7158	29.7158	0.0694836	0.00233827	2	29.0581	29.5054	1.18819	0.0408902	3	30.0297	29.6201
P09417	Dihydropteridine reductase	QDPR	27.8351	27.8351	0.577649	0.0207526	2	NaN	NaN	NaN	NaN	0	NaN	NaN	NaN	NaN	0	NaN	NaN	NaN	NaN	0	27.4147	27.4147	0.0777525	0.00283616	2	NaN	NaN	NaN	NaN	0	NaN	NaN	NaN	NaN	0	NaN	NaN	NaN	NaN	0	NaN	NaN	NaN	NaN	0	NaN	NaN
P09429	High mobility group protein B1	HMGB1	26.9387	26.9387	NaN	NaN	1	NaN	NaN	NaN	NaN	0	27.246	27.246	0.845678	0.0310386	2	NaN	NaN	NaN	NaN	0	30.6022	30.6022	NaN	NaN	1	NaN	NaN	NaN	NaN	0	NaN	NaN	NaN	NaN	0	26.2543	26.2543	3.82996	0.145879	2	24.669	24.669	NaN	NaN	1	26.9387	NaN
P09455	Retinol-binding protein 1	RBP1	28.9012	29.1715	0.625191	0.021632	3	29.0152	29.0367	0.442934	0.0152656	3	28.8546	28.7185	0.321659	0.0111476	3	27.8062	28.0729	0.806261	0.0289958	3	28.2346	28.987	1.45422	0.0515051	3	29.7439	29.7439	NaN	NaN	1	27.1909	27.1909	0.310678	0.0114258	2	27.6716	27.8685	0.404148	0.0146051	3	27.2312	27.2312	NaN	NaN	1	28.1864	28.562
P09493	Tropomyosin alpha-1 chain	TPM1	27.4744	27.4744	0.29526	0.0107467	2	NaN	NaN	NaN	NaN	0	27.1413	27.1413	NaN	NaN	1	28.0988	28.6608	1.41013	0.0501847	3	27.5442	27.5442	NaN	NaN	1	27.6186	27.6186	1.81587	0.0657478	2	27.9722	27.8842	0.503448	0.0179982	3	27.6846	27.1204	0.97716	0.0352962	3	27.3474	27.3629	0.0956786	0.00349864	3	NaN	NaN
P09496	Clathrin light chain A	CLTA	27.9745	27.9745	0.0707352	0.00252856	2	27.4611	27.4611	NaN	NaN	1	27.1684	27.1684	NaN	NaN	1	28.0731	28.0731	NaN	NaN	1	27.8146	27.8146	NaN	NaN	1	NaN	NaN	NaN	NaN	0	27.147	27.147	0.35028	0.0129031	2	27.7573	27.7573	NaN	NaN	1	26.803	26.803	0.120945	0.00451235	2	28.0245	27.4611
P09525	Annexin A4	ANXA4	27.0559	27.0559	1.29638	0.0479148	2	NaN	NaN	NaN	NaN	0	26.1317	26.1317	0.0407482	0.00155934	2	27.9013	27.9013	NaN	NaN	1	26.8052	26.8052	1.35154	0.050421	2	NaN	NaN	NaN	NaN	0	26.8943	26.8943	NaN	NaN	1	27.146	27.146	NaN	NaN	1	25.4027	25.4027	NaN	NaN	1	26.1393	NaN
P09543	2,3-cyclic-nucleotide 3-phosphodiesterase	CNP	NaN	NaN	NaN	NaN	0	NaN	NaN	NaN	NaN	0	NaN	NaN	NaN	NaN	0	26.4958	26.4958	NaN	NaN	1	26.9507	26.9507	NaN	NaN	1	NaN	NaN	NaN	NaN	0	NaN	NaN	NaN	NaN	0	NaN	NaN	NaN	NaN	0	NaN	NaN	NaN	NaN	0	NaN	NaN
P09601	Heme oxygenase 1	HMOX1	NaN	NaN	NaN	NaN	0	26.6225	26.6225	NaN	NaN	1	25.9301	25.9301	NaN	NaN	1	NaN	NaN	NaN	NaN	0	NaN	NaN	NaN	NaN	0	NaN	NaN	NaN	NaN	0	NaN	NaN	NaN	NaN	0	NaN	NaN	NaN	NaN	0	NaN	NaN	NaN	NaN	0	NaN	26.6225
P09622	Dihydrolipoyl dehydrogenase, mitochondrial	DLD	28.8154	28.7187	0.342973	0.0119024	3	28.4144	28.1357	0.729542	0.0256751	3	28.3517	28.1764	0.504554	0.0177962	3	27.8988	28.7637	1.55955	0.0559001	3	28.4429	28.5712	0.393153	0.0138225	3	28.401	28.4724	0.686605	0.0241754	3	28.1631	28.1702	0.351087	0.0124662	3	28.594	28.4223	0.623295	0.0217981	3	28.5338	28.7275	0.507072	0.0177709	3	29.1963	28.1357
P09651	Heterogeneous nuclear ribonucleoprotein A1;Heterogeneous nuclear ribonucleoprotein A1, N-terminally processed;Heterogeneous nuclear ribonucleoprotein A1-like 2	HNRNPA1	31.5539	31.9695	0.923665	0.0292726	3	31.5569	31.9076	0.935175	0.0296346	3	32.1097	32.036	0.135656	0.00422476	3	32.1251	32.1251	0.169723	0.00528319	2	31.9094	31.9202	0.214421	0.00671969	3	31.8573	31.7453	0.262235	0.00823156	3	32.1627	31.9717	0.400972	0.012467	3	31.7173	32.0339	0.657544	0.0207314	3	32.3175	32.3178	0.0292753	0.000905867	3	30.4954	32.266
P09661	U2 small nuclear ribonucleoprotein A	SNRPA1	NaN	NaN	NaN	NaN	0	NaN	NaN	NaN	NaN	0	NaN	NaN	NaN	NaN	0	NaN	NaN	NaN	NaN	0	NaN	NaN	NaN	NaN	0	NaN	NaN	NaN	NaN	0	28.2649	28.2649	NaN	NaN	1	27.7385	27.7385	0.488228	0.0176011	2	NaN	NaN	NaN	NaN	0	NaN	NaN
P09669	Cytochrome c oxidase subunit 6C	COX6C	23.2268	23.2268	NaN	NaN	1	NaN	NaN	NaN	NaN	0	NaN	NaN	NaN	NaN	0	NaN	NaN	NaN	NaN	0	NaN	NaN	NaN	NaN	0	28.4345	28.4345	NaN	NaN	1	NaN	NaN	NaN	NaN	0	NaN	NaN	NaN	NaN	0	NaN	NaN	NaN	NaN	0	NaN	NaN
P09871	Complement C1s subcomponent;Complement C1s subcomponent heavy chain;Complement C1s subcomponent light chain	C1S	34.005	34.1207	0.44475	0.013079	3	33.9485	33.9749	0.246184	0.0072517	3	34.1018	34.1544	0.169571	0.00497249	3	34.3526	34.1242	0.625088	0.0181962	3	33.9642	33.6869	0.794366	0.0233883	3	34.3116	34.2291	0.325877	0.00949757	3	34.4924	34.4282	0.134911	0.00391132	3	34.2909	34.0438	0.502357	0.0146499	3	34.6299	34.9633	1.03782	0.0299689	3	34.1207	33.6902
P09874	Poly [ADP-ribose] polymerase 1	PARP1	28.172	28.172	0.0101206	0.000359245	2	28.3059	28.3059	0.10279	0.00363139	2	27.9209	27.9209	0.0464033	0.00166196	2	NaN	NaN	NaN	NaN	0	NaN	NaN	NaN	NaN	0	27.6896	27.6896	0.202444	0.00731117	2	27.1882	27.1882	0.427031	0.0157065	2	28.465	28.465	NaN	NaN	1	28.6418	28.6418	NaN	NaN	1	28.1791	28.2332
P09936	Ubiquitin carboxyl-terminal hydrolase isozyme L1	UCHL1	30.5164	30.5164	0.130033	0.00426111	2	30.0908	30.0599	0.259991	0.00864022	3	29.8257	29.8314	0.161371	0.00541047	3	29.9943	29.9943	0.215726	0.00719222	2	29.9136	29.9136	0.32628	0.0109074	2	29.6816	29.6816	0.391736	0.0131979	2	NaN	NaN	NaN	NaN	0	28.2703	28.2703	NaN	NaN	1	NaN	NaN	NaN	NaN	0	NaN	30.0599
P09960	Leukotriene A-4 hydrolase	LTA4H	27.9751	28.0839	0.557087	0.0199137	3	28.026	27.7262	0.715713	0.0255375	3	28.019	27.7793	0.597722	0.0213327	3	28.2063	28.113	0.298312	0.0105761	3	27.6566	27.6046	0.541013	0.0195618	3	28.4755	28.7368	0.473037	0.016612	3	28.178	28.178	0.584923	0.0207581	2	28.2045	28.1876	0.0828226	0.0029365	3	26.8682	27.4883	1.10938	0.0412896	3	28.4698	28.8428
P09972	Fructose-bisphosphate aldolase C	ALDOC	29.7644	29.7638	0.14321	0.00481147	3	30.4054	30.2517	0.322017	0.0105908	3	29.5548	29.5548	0.935032	0.0316373	2	29.9494	30.0262	0.384025	0.0128225	3	29.301	29.301	0.841742	0.0287274	2	30.3386	30.3386	0.399185	0.0131577	2	30.4919	30.5071	0.225507	0.00739563	3	31.6958	31.2186	1.01852	0.0321343	3	30.8366	31.015	0.404114	0.013105	3	29.6214	30.2517
P0C0L4	Complement C4-A;Complement C4 beta chain;Complement C4-A alpha chain;C4a anaphylatoxin;C4b-A;C4d-A;Complement C4 gamma chain	C4A	33.5941	33.9662	1.35611	0.0403677	3	34.7259	34.6267	0.298358	0.00859182	3	34.2213	34.094	0.534548	0.0156203	3	35.4426	35.4084	0.1415	0.00399238	3	34.5064	34.436	0.723704	0.020973	3	34.4971	34.4054	0.778472	0.0225663	3	35.3104	35.2221	0.571802	0.0161936	3	34.6831	34.6164	0.152422	0.0043947	3	34.6505	34.825	1.40503	0.0405487	3	32.0908	35.0612
P0C0L5	Complement C4-B;Complement C4 beta chain;Complement C4-B alpha chain;C4a anaphylatoxin;C4b-B;C4d-B;Complement C4 gamma chain	C4B	33.5944	33.9789	1.3542	0.0403103	3	34.6994	34.5672	0.318135	0.00916832	3	34.2222	34.1105	0.542973	0.0158661	3	35.4401	35.43	0.134189	0.00378635	3	34.5019	34.4178	0.713905	0.0206917	3	34.4791	34.3327	0.756125	0.02193	3	35.3312	35.2166	0.58096	0.0164433	3	34.6876	34.6263	0.136091	0.00392331	3	34.6571	34.8187	1.41327	0.0407785	3	32.0895	35.0623
P0DJI8	Serum amyloid A-1 protein;Amyloid protein A;Serum amyloid protein A(2-104);Serum amyloid protein A(3-104);Serum amyloid protein A(2-103);Serum amyloid protein A(2-102);Serum amyloid protein A(4-101)	SAA1	NaN	NaN	NaN	NaN	0	30.5935	30.9714	1.18178	0.0386283	3	30.7607	31.1313	0.996495	0.032395	3	29.0277	29.0277	0.641899	0.0221133	2	30.1707	29.2248	1.746	0.0578707	3	29.6539	29.779	0.738788	0.0249137	3	NaN	NaN	NaN	NaN	0	31.6071	32.5406	1.63659	0.0517791	3	32.0279	31.9062	0.707009	0.0220748	3	NaN	31.5401
P0DJI9	Serum amyloid A-2 protein	SAA2	NaN	NaN	NaN	NaN	0	28.6371	28.8274	0.570449	0.01992	3	28.1926	28.2533	0.862767	0.0306026	3	27.9585	27.9585	NaN	NaN	1	30.6728	30.6728	NaN	NaN	1	29.2996	29.2996	NaN	NaN	1	NaN	NaN	NaN	NaN	0	30.8185	30.8185	1.14811	0.0372539	2	30.7509	30.2726	1.5201	0.0494329	3	NaN	28.8274
P0DMV9	Heat shock 70 kDa protein 1B;Heat shock 70 kDa protein 1A	HSPA1B	30.8894	30.9643	0.192941	0.00624617	3	30.9828	31.0036	0.0413444	0.00133443	3	30.9148	30.8767	0.114398	0.00370042	3	31.2698	31.2641	0.159382	0.00509699	3	30.9027	30.9101	0.0612418	0.00198176	3	31.1004	31.0602	0.0993935	0.00319589	3	31.1726	31.1302	0.309704	0.00993513	3	30.9035	30.8635	0.112511	0.00364072	3	31.0404	30.9318	0.502872	0.0162006	3	30.9643	30.9352
P0DN76	Splicing factor U2AF 35 kDa subunit	U2AF1	28.9404	28.9404	0.293275	0.0101337	2	29.4261	29.4058	0.531393	0.0180586	3	29.0067	28.9502	0.102997	0.00355081	3	29.0731	28.7703	0.861193	0.0296216	3	28.6228	28.6228	1.18069	0.0412499	2	29.6238	29.6238	0.698927	0.0235934	2	28.6055	28.8393	0.651154	0.0227633	3	29.0896	28.9423	0.294006	0.0101069	3	28.9817	28.4992	1.10137	0.0380024	3	28.7331	28.9051
P0DN79	Cystathionine beta-synthase	CBS	NaN	NaN	NaN	NaN	0	NaN	NaN	NaN	NaN	0	NaN	NaN	NaN	NaN	0	NaN	NaN	NaN	NaN	0	NaN	NaN	NaN	NaN	0	26.7699	26.7699	0.404293	0.0151025	2	NaN	NaN	NaN	NaN	0	26.0505	26.0505	NaN	NaN	1	NaN	NaN	NaN	NaN	0	NaN	NaN
P10155	60 kDa SS-A/Ro ribonucleoprotein	TROVE2	NaN	NaN	NaN	NaN	0	27.0066	27.0066	NaN	NaN	1	27.4842	27.4842	NaN	NaN	1	29.2927	29.2927	NaN	NaN	1	27.1894	27.1894	NaN	NaN	1	27.0493	27.0493	NaN	NaN	1	NaN	NaN	NaN	NaN	0	NaN	NaN	NaN	NaN	0	29.7935	29.7935	NaN	NaN	1	NaN	NaN
P10253	Lysosomal alpha-glucosidase;76 kDa lysosomal alpha-glucosidase;70 kDa lysosomal alpha-glucosidase	GAA	27.5512	27.5512	0.297863	0.0108112	2	27.2952	27.2952	NaN	NaN	1	NaN	NaN	NaN	NaN	0	28.3754	28.3754	NaN	NaN	1	NaN	NaN	NaN	NaN	0	NaN	NaN	NaN	NaN	0	NaN	NaN	NaN	NaN	0	NaN	NaN	NaN	NaN	0	NaN	NaN	NaN	NaN	0	27.7619	NaN
P10301	Ras-related protein R-Ras	RRAS	NaN	NaN	NaN	NaN	0	NaN	NaN	NaN	NaN	0	26.2011	26.2011	NaN	NaN	1	NaN	NaN	NaN	NaN	0	26.9756	26.9756	NaN	NaN	1	NaN	NaN	NaN	NaN	0	NaN	NaN	NaN	NaN	0	NaN	NaN	NaN	NaN	0	26.4356	26.4356	NaN	NaN	1	NaN	NaN
P10412	Histone H1.4;Histone H1.3	HIST1H1E	29.1477	29.1477	NaN	NaN	1	29.3877	29.3877	NaN	NaN	1	29.7324	29.7324	NaN	NaN	1	29.3585	29.3585	0.176704	0.00601882	2	29.5039	29.5039	NaN	NaN	1	29.5127	29.4508	0.268617	0.00910174	3	29.4875	29.4875	0.612207	0.0207616	2	29.4806	29.4806	0.0119562	0.000405562	2	29.1656	29.1656	0.581899	0.0199515	2	NaN	29.3877
P10515	Dihydrolipoyllysine-residue acetyltransferase component of pyruvate dehydrogenase complex, mitochondrial	DLAT	28.7945	28.7945	0.120674	0.00419085	2	27.9889	27.5699	0.980816	0.0350431	3	27.9748	28.1027	0.22467	0.00803113	3	28.6032	28.6032	0.221288	0.00773646	2	27.8011	27.9377	0.353886	0.0127292	3	27.5248	27.4724	0.110634	0.00401944	3	27.7422	27.7422	0.187628	0.00676329	2	27.7057	27.7057	NaN	NaN	1	27.7127	27.8009	0.551158	0.0198883	3	NaN	27.2871
P10599	Thioredoxin	TXN	32.6985	32.6163	0.360807	0.0110344	3	32.4259	32.3748	0.275361	0.00849202	3	32.8503	32.7052	0.303219	0.00923032	3	33.0247	32.9536	0.610785	0.0184948	3	32.2461	32.252	0.286362	0.00888052	3	33.0134	32.8848	0.442552	0.0134052	3	33.0782	32.8202	0.600796	0.0181629	3	32.8243	32.938	0.374081	0.0113965	3	32.954	33.0553	0.725586	0.0220181	3	32.3859	32.7232
P10606	Cytochrome c oxidase subunit 5B, mitochondrial	COX5B	28.3265	28.3265	NaN	NaN	1	NaN	NaN	NaN	NaN	0	29.0116	29.0116	NaN	NaN	1	28.9999	28.9999	NaN	NaN	1	29.0713	29.0713	0.515934	0.0177472	2	29.6144	29.6144	0.485654	0.0163993	2	29.134	29.134	NaN	NaN	1	28.7097	28.7097	NaN	NaN	1	29.3222	29.3222	NaN	NaN	1	NaN	NaN
P10619	Lysosomal protective protein;Lysosomal protective protein 32 kDa chain;Lysosomal protective protein 20 kDa chain	CTSA	NaN	NaN	NaN	NaN	0	25.425	25.425	0.528842	0.0208001	2	25.0221	25.0221	NaN	NaN	1	NaN	NaN	NaN	NaN	0	NaN	NaN	NaN	NaN	0	26.6161	26.6161	NaN	NaN	1	NaN	NaN	NaN	NaN	0	NaN	NaN	NaN	NaN	0	NaN	NaN	NaN	NaN	0	NaN	25.7989
P10636	Microtubule-associated protein tau	MAPT	25.7083	25.7083	NaN	NaN	1	26.3607	26.3607	NaN	NaN	1	NaN	NaN	NaN	NaN	0	NaN	NaN	NaN	NaN	0	NaN	NaN	NaN	NaN	0	NaN	NaN	NaN	NaN	0	NaN	NaN	NaN	NaN	0	NaN	NaN	NaN	NaN	0	NaN	NaN	NaN	NaN	0	25.7083	NaN
P10643	Complement component C7	C7	29.8752	29.8232	0.090259	0.0030212	3	30.6654	30.8254	0.703599	0.0229444	3	30.246	30.6275	0.733721	0.0242584	3	31.8029	31.9185	0.359513	0.0113044	3	29.0859	29.1166	1.92907	0.066323	3	31.3344	31.3275	0.487613	0.0155616	3	31.6802	31.6802	0.41069	0.0129636	2	29.9647	29.9647	1.30908	0.0436874	2	28.6654	27.1471	3.61485	0.126105	3	29.8229	31.2752
P10644	cAMP-dependent protein kinase type I-alpha regulatory subunit;cAMP-dependent protein kinase type I-alpha regulatory subunit, N-terminally processed	PRKAR1A	28.1095	28.1095	0.069133	0.00245941	2	28.3571	28.1932	0.344845	0.0121608	3	28.7878	28.3588	0.761314	0.0264457	3	28.3802	28.3802	0.171339	0.00603726	2	27.4956	27.4901	0.0711281	0.00258689	3	29.8015	29.8015	NaN	NaN	1	NaN	NaN	NaN	NaN	0	28.354	28.354	NaN	NaN	1	28.2605	28.2605	0.605957	0.0214418	2	28.0606	28.1932
P10768	S-formylglutathione hydrolase	ESD	28.3237	28.3594	0.334058	0.0117943	3	28.4414	28.6224	0.372492	0.0130968	3	28.5245	28.4794	0.160932	0.00564189	3	28.6105	28.6105	0.14271	0.00498803	2	28.5163	28.4782	0.308598	0.0108218	3	28.9751	28.6249	1.37004	0.0472835	3	28.23	28.23	0.503476	0.0178348	2	28.8991	28.8991	0.0567667	0.00196431	2	28.7232	28.7232	0.0789191	0.00274758	2	28.3594	28.013
P10809	60 kDa heat shock protein, mitochondrial	HSPD1	32.4938	32.4892	0.0829319	0.00255224	3	31.9456	32.175	0.586142	0.0183482	3	32.275	32.2298	0.195986	0.00607237	3	32.7166	32.6574	0.11789	0.00360338	3	32.4519	32.4681	0.162137	0.00499621	3	32.4187	32.5085	0.226009	0.00697157	3	32.4738	32.471	0.107531	0.00331132	3	32.2528	32.3848	0.42986	0.0133278	3	32.4519	32.4478	0.117574	0.00362302	3	32.4892	32.3823
P10909	Clusterin;Clusterin beta chain;Clusterin alpha chain	CLU	31.9585	32.023	0.508351	0.0159066	3	32.3662	32.3349	0.207931	0.00642431	3	31.9035	31.8494	0.415076	0.0130104	3	32.5538	32.5423	0.228843	0.00702967	3	31.4724	31.2434	1.06422	0.0338144	3	32.2061	31.9907	0.439086	0.0136336	3	32.1004	32.1434	0.259269	0.0080768	3	31.7071	31.6586	0.416293	0.0131293	3	31.79	32.1909	1.11672	0.0351282	3	32.4316	32.5881
P11021	78 kDa glucose-regulated protein	HSPA5	32.8656	32.8311	0.151062	0.00459637	3	32.6994	32.6717	0.0778436	0.00238058	3	32.5923	32.5532	0.162055	0.00497219	3	32.6211	32.676	0.128362	0.00393493	3	32.6725	32.5751	0.374997	0.0114774	3	32.2294	32.6289	0.730345	0.0226608	3	32.7435	32.7828	0.117746	0.00359601	3	32.1834	32.4058	0.575682	0.0178876	3	32.7629	32.7369	0.106724	0.00325747	3	32.8311	32.6717
P11047	Laminin subunit gamma-1	LAMC1	NaN	NaN	NaN	NaN	0	NaN	NaN	NaN	NaN	0	NaN	NaN	NaN	NaN	0	NaN	NaN	NaN	NaN	0	26.0598	26.0598	NaN	NaN	1	NaN	NaN	NaN	NaN	0	NaN	NaN	NaN	NaN	0	NaN	NaN	NaN	NaN	0	NaN	NaN	NaN	NaN	0	NaN	NaN
P11142	Heat shock cognate 71 kDa protein	HSPA8	32.7283	32.698	0.356056	0.0108791	3	32.5686	32.5989	0.0528048	0.00162134	3	32.5199	32.5111	0.0565951	0.00174032	3	32.6915	32.6914	0.120422	0.0036836	3	32.6691	32.7338	0.170907	0.00523146	3	32.7781	32.6581	0.255806	0.0078042	3	32.6754	32.6546	0.0830473	0.00254159	3	32.4332	32.5262	0.310767	0.00958176	3	32.6582	32.681	0.0493643	0.00151155	3	32.3884	32.5994
P11171	Protein 4.1	EPB41	25.1969	25.1969	NaN	NaN	1	26.1897	26.1897	1.86069	0.0710464	2	25.5623	25.5623	0.275777	0.0107884	2	NaN	NaN	NaN	NaN	0	26.3192	26.3192	NaN	NaN	1	25.2087	25.2087	NaN	NaN	1	NaN	NaN	NaN	NaN	0	NaN	NaN	NaN	NaN	0	NaN	NaN	NaN	NaN	0	25.1969	24.874
P11172	Uridine 5-monophosphate synthase;Orotate phosphoribosyltransferase;Orotidine 5-phosphate decarboxylase	UMPS	NaN	NaN	NaN	NaN	0	26.7783	26.6259	0.273859	0.0102269	3	26.7668	26.7668	1.59085	0.0594338	2	25.6593	25.6593	0.635674	0.0247736	2	27.0347	27.0347	0.596616	0.0220685	2	27.255	27.255	0.700216	0.0256913	2	NaN	NaN	NaN	NaN	0	NaN	NaN	NaN	NaN	0	NaN	NaN	NaN	NaN	0	NaN	26.6146
P11177	Pyruvate dehydrogenase E1 component subunit beta, mitochondrial	PDHB	28.6608	28.5944	0.264187	0.00921769	3	28.4734	28.5122	0.279552	0.00981799	3	28.5126	28.4058	0.257205	0.00902073	3	28.1572	28.3024	0.494964	0.0175786	3	28.6314	28.6005	0.366056	0.0127851	3	28.0873	28.0027	0.694831	0.0247383	3	28.7271	28.7271	0.183584	0.00639061	2	27.9737	27.9665	0.152904	0.00546598	3	28.0095	28.0675	0.192536	0.00687394	3	28.9519	28.1765
P11182	Lipoamide acyltransferase component of branched-chain alpha-keto acid dehydrogenase complex, mitochondrial	DBT	NaN	NaN	NaN	NaN	0	NaN	NaN	NaN	NaN	0	23.8297	23.8297	NaN	NaN	1	NaN	NaN	NaN	NaN	0	NaN	NaN	NaN	NaN	0	NaN	NaN	NaN	NaN	0	NaN	NaN	NaN	NaN	0	NaN	NaN	NaN	NaN	0	NaN	NaN	NaN	NaN	0	NaN	NaN
P11216	Glycogen phosphorylase, brain form	PYGB	28.8508	28.8508	0.216805	0.00751469	2	28.7211	28.7783	0.3037	0.0105741	3	28.3652	28.3963	0.143696	0.00506591	3	28.4701	28.401	0.149995	0.0052685	3	28.8322	28.8322	0.684075	0.023726	2	28.6533	29.0189	0.909083	0.031727	3	29.2214	29.2214	0.195537	0.00669156	2	30.0125	30.0125	0.451474	0.0150429	2	28.8872	28.7979	0.496253	0.017179	3	NaN	28.3928
P11226	Mannose-binding protein C	MBL2	29.8413	29.8413	NaN	NaN	1	29.0976	29.0976	0.394579	0.0135605	2	28.4384	28.4384	NaN	NaN	1	29.7098	29.7098	NaN	NaN	1	30.1326	30.1326	NaN	NaN	1	29.2268	29.2268	0.495762	0.0169626	2	NaN	NaN	NaN	NaN	0	30.1607	30.1607	NaN	NaN	1	29.5828	29.5828	NaN	NaN	1	NaN	NaN
P11233	Ras-related protein Ral-A	RALA	NaN	NaN	NaN	NaN	0	NaN	NaN	NaN	NaN	0	NaN	NaN	NaN	NaN	0	NaN	NaN	NaN	NaN	0	27.1193	27.1193	NaN	NaN	1	24.762	24.762	NaN	NaN	1	NaN	NaN	NaN	NaN	0	NaN	NaN	NaN	NaN	0	NaN	NaN	NaN	NaN	0	NaN	NaN
P11234	Ras-related protein Ral-B	RALB	NaN	NaN	NaN	NaN	0	NaN	NaN	NaN	NaN	0	NaN	NaN	NaN	NaN	0	NaN	NaN	NaN	NaN	0	27.1559	27.1559	NaN	NaN	1	24.7944	24.7944	NaN	NaN	1	NaN	NaN	NaN	NaN	0	NaN	NaN	NaN	NaN	0	NaN	NaN	NaN	NaN	0	NaN	NaN
P11277	Spectrin beta chain, erythrocytic	SPTB	25.2109	25.2109	NaN	NaN	1	NaN	NaN	NaN	NaN	0	NaN	NaN	NaN	NaN	0	NaN	NaN	NaN	NaN	0	NaN	NaN	NaN	NaN	0	NaN	NaN	NaN	NaN	0	NaN	NaN	NaN	NaN	0	NaN	NaN	NaN	NaN	0	NaN	NaN	NaN	NaN	0	NaN	NaN
P11279	Lysosome-associated membrane glycoprotein 1	LAMP1	29.4862	29.5239	0.0999528	0.00338981	3	29.0232	29.0506	0.255732	0.00881132	3	29.2706	29.5252	0.497537	0.0169978	3	28.6362	28.6362	0.597281	0.0208576	2	28.567	28.567	0.214376	0.00750432	2	28.209	28.3051	0.354459	0.0125655	3	28.8466	28.8466	0.105114	0.00364388	2	28.1469	28.1469	NaN	NaN	1	28.0254	28.0254	0.277556	0.00990372	2	29.5239	29.0506
P11310	Medium-chain specific acyl-CoA dehydrogenase, mitochondrial	ACADM	28.1804	28.1804	NaN	NaN	1	NaN	NaN	NaN	NaN	0	28.0181	28.0181	NaN	NaN	1	27.6056	27.6056	0.782569	0.0283482	2	27.6682	27.6682	NaN	NaN	1	27.6583	27.6583	NaN	NaN	1	29.2559	29.2559	NaN	NaN	1	27.5524	27.5524	NaN	NaN	1	NaN	NaN	NaN	NaN	0	NaN	NaN
P11387	DNA topoisomerase 1	TOP1	NaN	NaN	NaN	NaN	0	NaN	NaN	NaN	NaN	0	25.2915	25.2915	NaN	NaN	1	NaN	NaN	NaN	NaN	0	NaN	NaN	NaN	NaN	0	NaN	NaN	NaN	NaN	0	NaN	NaN	NaN	NaN	0	NaN	NaN	NaN	NaN	0	NaN	NaN	NaN	NaN	0	NaN	NaN
P11413	Glucose-6-phosphate 1-dehydrogenase	G6PD	28.1892	28.1892	0.786232	0.0278913	2	27.6214	27.6214	NaN	NaN	1	28.1315	27.5429	1.16095	0.0412685	3	27.7584	27.7584	0.754155	0.0271685	2	28.7931	28.5942	0.400405	0.0139063	3	28.6208	28.6208	0.244769	0.00855212	2	28.6003	28.6003	0.639354	0.0223548	2	27.9614	27.9502	0.0967541	0.00346028	3	28.5143	28.4956	0.169449	0.00594261	3	28.7452	27.6214
P11441	Ubiquitin-like protein 4A	UBL4A	NaN	NaN	NaN	NaN	0	NaN	NaN	NaN	NaN	0	NaN	NaN	NaN	NaN	0	NaN	NaN	NaN	NaN	0	NaN	NaN	NaN	NaN	0	NaN	NaN	NaN	NaN	0	30.5255	30.5255	NaN	NaN	1	29.1587	29.1587	NaN	NaN	1	NaN	NaN	NaN	NaN	0	NaN	NaN
P11586	C-1-tetrahydrofolate synthase, cytoplasmic;Methylenetetrahydrofolate dehydrogenase;Methenyltetrahydrofolate cyclohydrolase;Formyltetrahydrofolate synthetase;C-1-tetrahydrofolate synthase, cytoplasmic, N-terminally processed	MTHFD1	29.0172	29.0407	0.102769	0.00354168	3	29.7429	29.6372	0.41897	0.0140864	3	29.3858	29.3341	0.289737	0.00985976	3	28.6648	28.9016	0.892929	0.0311507	3	29.1199	29.1048	0.0884622	0.00303786	3	29.1145	29.0414	0.1585	0.00544402	3	29.6265	29.5526	0.468197	0.0158033	3	29.9968	29.7503	0.552803	0.0184288	3	28.9683	28.947	0.453362	0.0156503	3	29.0407	30.2045
P11717	Cation-independent mannose-6-phosphate receptor	IGF2R	25.7252	25.7252	NaN	NaN	1	25.4201	25.4201	NaN	NaN	1	26.5488	26.5488	NaN	NaN	1	26.5965	26.5965	NaN	NaN	1	25.9301	25.9301	0.695486	0.0268216	2	25.8201	25.8201	0.927214	0.0359105	2	NaN	NaN	NaN	NaN	0	25.9955	25.9955	0.339063	0.0130431	2	NaN	NaN	NaN	NaN	0	NaN	NaN
P11766	Alcohol dehydrogenase class-3	ADH5	29.2638	29.1968	0.412024	0.0140796	3	28.9286	28.8704	0.445228	0.0153906	3	28.9065	29.0381	0.236827	0.00819286	3	28.9097	29.1174	0.635714	0.0219896	3	29.1172	29.0101	0.232232	0.00797579	3	28.9875	28.9289	0.1194	0.00411903	3	29.0682	29.0682	0.134527	0.00462799	2	29.0695	29.2093	0.312982	0.0107667	3	29.2503	29.2715	0.485621	0.0166022	3	28.8894	28.8704
P11802	Cyclin-dependent kinase 4	CDK4	NaN	NaN	NaN	NaN	0	23.038	23.038	NaN	NaN	1	NaN	NaN	NaN	NaN	0	26.66	26.66	NaN	NaN	1	22.5641	22.5641	NaN	NaN	1	NaN	NaN	NaN	NaN	0	NaN	NaN	NaN	NaN	0	NaN	NaN	NaN	NaN	0	NaN	NaN	NaN	NaN	0	NaN	23.038
P11908	Ribose-phosphate pyrophosphokinase 2	PRPS2	NaN	NaN	NaN	NaN	0	28.5023	28.5023	1.9798	0.0694609	2	26.0069	26.0069	NaN	NaN	1	29.5184	29.5184	NaN	NaN	1	28.2771	28.2771	0.385259	0.0136244	2	NaN	NaN	NaN	NaN	0	NaN	NaN	NaN	NaN	0	NaN	NaN	NaN	NaN	0	NaN	NaN	NaN	NaN	0	NaN	NaN
P11940	Polyadenylate-binding protein 1;Polyadenylate-binding protein 3	PABPC1	30.6117	30.5617	0.247098	0.008072	3	30.4924	30.4098	0.201891	0.00662102	3	30.2388	30.236	0.124937	0.00413167	3	30.1719	30.2165	0.37681	0.0124888	3	29.8357	30.2778	0.775235	0.0259835	3	29.9267	30.1592	0.584699	0.0195377	3	30.0248	29.8928	0.465629	0.0155081	3	29.8484	29.9977	0.393086	0.0131694	3	30.2247	30.3733	0.291112	0.00963158	3	30.3935	30.4098
P12004	Proliferating cell nuclear antigen	PCNA	31.0193	31.04	0.226343	0.00729686	3	31.1533	31.2771	0.339827	0.0109082	3	30.9352	30.9955	0.204846	0.00662177	3	31.1079	31.1051	0.159409	0.00512438	3	30.5196	30.5512	0.194384	0.00636914	3	31.0568	30.941	0.268729	0.00865283	3	30.3995	30.4179	0.429107	0.0141156	3	30.4501	30.3308	0.50359	0.0165382	3	30.0677	30.2217	0.294364	0.00979003	3	31.2345	30.769
P12081	Histidine--tRNA ligase, cytoplasmic	HARS	27.6488	27.6488	0.229491	0.0083002	2	28.1447	28.007	0.594058	0.0211073	3	27.2669	27.2669	NaN	NaN	1	27.7891	28.1528	1.06151	0.0381989	3	27.3289	27.2846	0.0782904	0.00286475	3	26.6714	26.6714	NaN	NaN	1	27.6087	27.6087	0.461507	0.016716	2	28.1229	28.1229	NaN	NaN	1	26.9	26.9	NaN	NaN	1	27.4865	28.007
P12109	Collagen alpha-1(VI) chain	COL6A1	27.6678	27.6678	0.0584081	0.00211105	2	28.0378	28.0378	NaN	NaN	1	26.9588	26.9588	NaN	NaN	1	28.1811	28.1811	NaN	NaN	1	27.7355	27.7355	1.21006	0.0436286	2	NaN	NaN	NaN	NaN	0	NaN	NaN	NaN	NaN	0	NaN	NaN	NaN	NaN	0	NaN	NaN	NaN	NaN	0	NaN	28.0378
P12235	ADP/ATP translocase 1	SLC25A4	31.235	31.276	0.147208	0.00471292	3	31.3833	31.3153	0.1779	0.00566862	3	31.2824	31.286	0.0372377	0.00119037	3	31.2254	31.2006	0.294322	0.00942573	3	31.3177	31.2635	0.160307	0.00511872	3	31.3293	31.2219	0.22413	0.00715402	3	31.427	31.2044	0.59501	0.0189331	3	31.4193	31.3763	0.105713	0.00336458	3	31.3732	31.4366	0.220935	0.00704213	3	31.3573	31.2495
P12236	ADP/ATP translocase 3;ADP/ATP translocase 3, N-terminally processed	SLC25A6	31.2465	31.2936	0.13206	0.00422638	3	31.3251	31.3602	0.0796165	0.00254162	3	31.2853	31.3046	0.0475947	0.00152131	3	31.3308	31.2138	0.226838	0.0072401	3	31.2495	31.258	0.118324	0.00378643	3	31.2725	31.2007	0.217672	0.00696049	3	31.4691	31.188	0.549178	0.0174514	3	31.4722	31.3814	0.218163	0.00693192	3	31.525	31.5468	0.362858	0.0115101	3	31.3486	31.3602
P12268	Inosine-5-monophosphate dehydrogenase 2	IMPDH2	29.6642	29.609	0.41638	0.0140364	3	29.3133	29.1983	0.228357	0.00779023	3	29.4254	29.4055	0.313806	0.0106645	3	29.646	29.3956	0.482934	0.01629	3	29.0814	29.2129	0.373007	0.0128263	3	28.9976	28.8212	0.670752	0.0231313	3	29.5673	29.5317	0.152919	0.00517189	3	29.3863	29.5536	0.402155	0.0136851	3	29.1198	29.1243	0.0114447	0.000393022	3	30.1055	29.1654
P12270	Nucleoprotein TPR	TPR	27.2784	27.1181	0.417451	0.0153034	3	26.965	26.7265	0.640103	0.0237383	3	27.5038	27.1552	0.79011	0.0287273	3	26.6017	26.6017	0.845679	0.0317904	2	27.7438	27.8964	0.436858	0.0157462	3	26.6999	26.6999	1.80321	0.0675363	2	NaN	NaN	NaN	NaN	0	26.5051	26.5051	0.457448	0.0172589	2	NaN	NaN	NaN	NaN	0	27.1181	26.7265
P12277	Creatine kinase B-type	CKB	28.8075	28.9918	0.32986	0.0114505	3	29.0683	29.0574	0.0796642	0.00274059	3	28.9263	28.9781	0.0898107	0.00310481	3	29.2955	29.7687	0.838245	0.0286134	3	28.3063	28.4601	0.304577	0.01076	3	28.9145	28.6783	0.522759	0.0180794	3	29.2295	29.1881	0.645537	0.0220851	3	29.3085	29.3384	0.225635	0.00769864	3	28.9157	29.0341	0.599249	0.020724	3	28.9918	28.9947
P12429	Annexin A3	ANXA3	27.8567	27.8567	NaN	NaN	1	27.3758	27.3758	NaN	NaN	1	28.2585	28.2585	0.394565	0.0139627	2	27.6554	27.7363	0.395062	0.0142852	3	27.3747	27.3747	0.438087	0.0160033	2	27.8605	27.8605	NaN	NaN	1	NaN	NaN	NaN	NaN	0	31.2375	31.2375	NaN	NaN	1	NaN	NaN	NaN	NaN	0	NaN	NaN
P12532	Creatine kinase U-type, mitochondrial	CKMT1A	28.2823	28.2823	0.124078	0.00438711	2	28.1687	28.1687	0.118433	0.00420443	2	28.2087	28.2087	0.124883	0.0044271	2	28.292	28.2687	0.34001	0.0120179	3	28.4408	28.4056	0.252161	0.00886616	3	28.8929	28.8929	NaN	NaN	1	NaN	NaN	NaN	NaN	0	28.2911	28.2911	0.161616	0.0057126	2	27.5933	27.5933	NaN	NaN	1	NaN	28.085
P12814	Alpha-actinin-1	ACTN1	29.3805	29.7761	0.719843	0.0245007	3	29.6781	29.7553	0.278278	0.00937652	3	29.5744	29.4438	0.257729	0.00871461	3	29.729	29.4836	0.496476	0.0167	3	29.5355	29.4079	0.304341	0.0103043	3	29.5907	29.2591	0.595906	0.0201383	3	29.5033	29.3944	0.764285	0.025905	3	29.2423	29.6362	0.852218	0.0291433	3	28.8522	29.2882	1.14848	0.0398057	3	28.5497	29.9097
P12830	Cadherin-1;E-Cad/CTF1;E-Cad/CTF2;E-Cad/CTF3	CDH1	27.9762	27.9762	NaN	NaN	1	27.8771	27.8771	NaN	NaN	1	27.2621	27.2621	NaN	NaN	1	NaN	NaN	NaN	NaN	0	NaN	NaN	NaN	NaN	0	NaN	NaN	NaN	NaN	0	NaN	NaN	NaN	NaN	0	NaN	NaN	NaN	NaN	0	NaN	NaN	NaN	NaN	0	NaN	27.8771
P12931	Proto-oncogene tyrosine-protein kinase Src	SRC	24.6719	24.6719	NaN	NaN	1	NaN	NaN	NaN	NaN	0	NaN	NaN	NaN	NaN	0	26.5539	26.5539	NaN	NaN	1	NaN	NaN	NaN	NaN	0	26.1244	26.1244	0.787233	0.030134	2	26.2923	26.2923	0.0942444	0.00358448	2	26.0255	25.9278	0.29886	0.0114833	3	25.8838	26.4665	1.16297	0.0449303	3	24.6719	NaN
P12955	Xaa-Pro dipeptidase	PEPD	25.934	25.934	NaN	NaN	1	25.7269	25.7269	0.458368	0.0178166	2	25.3358	25.3358	0.097426	0.00384538	2	NaN	NaN	NaN	NaN	0	NaN	NaN	NaN	NaN	0	25.2577	25.2577	NaN	NaN	1	24.9204	24.9204	0.181183	0.00727047	2	26.1453	26.1453	0.702033	0.0268512	2	25.911	25.911	NaN	NaN	1	25.934	25.4028
P12956	X-ray repair cross-complementing protein 6	XRCC6	28.2877	28.0999	0.3333	0.0117825	3	28.0832	28.1627	0.2159	0.00768784	3	27.9362	27.9362	0.00556069	0.000199049	2	28.1033	28.3531	0.857535	0.0305137	3	28.473	28.7744	0.6173	0.0216802	3	28.1976	28.1976	0.847946	0.0300716	2	27.6798	27.6798	0.507172	0.0183228	2	27.7727	27.9262	0.308854	0.0111208	3	27.8488	27.8488	NaN	NaN	1	28.0906	28.1627
P13010	X-ray repair cross-complementing protein 5	XRCC5	30.0954	29.9935	0.298256	0.00991038	3	30.151	30.1926	0.168588	0.00559144	3	30.1586	30.1657	0.0144465	0.000479017	3	30.0286	29.9204	0.344022	0.0114565	3	30.1301	30.1604	0.279358	0.00927172	3	30.0111	29.9383	0.6332	0.0210989	3	29.7567	29.8232	0.140822	0.00473245	3	29.8408	29.9056	0.39203	0.0131374	3	30.0328	30.0725	0.133635	0.00444962	3	30.4312	30.1926
P13073	Cytochrome c oxidase subunit 4 isoform 1, mitochondrial	COX4I1	28.7045	28.5713	0.260331	0.00906935	3	28.1442	28.1923	0.634185	0.0225334	3	28.5414	28.6659	0.343744	0.0120437	3	28.2785	28.5947	0.689821	0.0243938	3	28.4602	28.4602	0.658144	0.023125	2	28.1506	28.2819	0.400073	0.0142119	3	28.3525	28.3525	0.273455	0.00964483	2	28.8422	28.7366	0.281958	0.00977587	3	28.7538	28.8997	0.382562	0.0133047	3	28.5713	28.1923
P13473	Lysosome-associated membrane glycoprotein 2	LAMP2	24.1714	24.1714	NaN	NaN	1	NaN	NaN	NaN	NaN	0	NaN	NaN	NaN	NaN	0	24.5437	24.5437	NaN	NaN	1	25.7227	25.7227	NaN	NaN	1	NaN	NaN	NaN	NaN	0	NaN	NaN	NaN	NaN	0	NaN	NaN	NaN	NaN	0	25.7971	25.7971	NaN	NaN	1	NaN	NaN
P13497	Bone morphogenetic protein 1	BMP1	27.6393	27.8678	0.812203	0.0293858	3	NaN	NaN	NaN	NaN	0	27.1728	27.1728	0.739194	0.0272035	2	28.9272	28.5513	1.20086	0.0415132	3	NaN	NaN	NaN	NaN	0	27.5893	27.5893	NaN	NaN	1	NaN	NaN	NaN	NaN	0	27.6202	27.6202	NaN	NaN	1	28.8248	28.8248	0.427821	0.0148421	2	27.8678	NaN
P13639	Elongation factor 2	EEF2	31.3759	31.2794	0.269908	0.0086024	3	31.5074	31.4022	0.273798	0.00868997	3	31.2548	31.2131	0.127479	0.00407871	3	31.6814	31.7699	0.254848	0.00804408	3	31.5664	31.6122	0.120408	0.00381444	3	31.3897	31.2682	0.225389	0.00718036	3	31.3418	31.3458	0.257738	0.00822345	3	31.3037	31.2832	0.153925	0.00491714	3	31.4893	31.5384	0.087173	0.00276834	3	31.1675	31.4022
P13667	Protein disulfide-isomerase A4	PDIA4	29.6913	29.806	0.702123	0.0236474	3	29.8467	29.8805	0.321479	0.010771	3	30.1811	30.1332	0.128099	0.00424435	3	29.8775	29.8578	0.104405	0.00349443	3	29.6178	29.8737	0.583503	0.0197011	3	29.3657	29.2638	0.353253	0.0120295	3	30.1814	30.2249	0.111699	0.0037009	3	29.6385	29.5061	0.323947	0.0109299	3	29.0471	29.2597	0.782363	0.0269343	3	30.329	30.15
P13671	Complement component C6	C6	30.082	30.1505	0.454511	0.0151091	3	29.4442	29.7685	1.24147	0.0421634	3	29.221	29.1938	0.241778	0.00827413	3	31.5641	31.7909	0.577104	0.0182835	3	28.1804	28.4663	3.20364	0.113683	3	29.6351	29.1329	0.894022	0.0301677	3	30.7135	30.2177	1.1441	0.0372508	3	29.9387	29.7404	0.403876	0.0134901	3	29.9294	30.8797	3.25273	0.10868	3	30.4984	30.4913
P13693	Translationally-controlled tumor protein	TPT1	29.2962	29.3795	0.570028	0.0194574	3	29.7689	29.6978	0.160777	0.00540084	3	29.6465	29.7277	0.220484	0.00743711	3	29.4908	29.4908	0.464501	0.0157507	2	29.7453	29.7453	1.16401	0.0391327	2	29.8905	29.8905	0.485877	0.0162552	2	29.8124	29.8124	NaN	NaN	1	29.8666	29.8666	0.0726517	0.00243254	2	29.5524	29.4232	0.421786	0.0142725	3	28.6891	29.6559
P13797	Plastin-3	PLS3	29.2868	29.4118	0.307389	0.0104958	3	29.3607	29.4066	0.164669	0.00560849	3	29.4855	29.498	0.104196	0.00353381	3	28.7506	29.1756	0.740919	0.0257706	3	28.8542	28.9807	0.415871	0.0144129	3	28.7137	29.7123	1.83652	0.06396	3	28.4574	28.4697	0.417656	0.0146765	3	28.6691	29.2895	1.07988	0.037667	3	28.219	28.219	0.504791	0.0178884	2	29.512	29.4066
P13798	Acylamino-acid-releasing enzyme	APEH	27.6542	27.8989	0.458806	0.0165908	3	27.6264	27.7722	0.350434	0.0126848	3	27.2261	27.0435	0.39114	0.0143664	3	27.8142	27.8696	0.833704	0.0299741	3	27.7115	27.7115	0.161639	0.00583292	2	27.5488	27.5451	0.237186	0.00860964	3	NaN	NaN	NaN	NaN	0	27.4827	27.2414	0.608351	0.0221358	3	27.2841	27.0532	0.49695	0.0182139	3	27.8989	27.7722
P13804	Electron transfer flavoprotein subunit alpha, mitochondrial	ETFA	28.2808	28.3276	0.469837	0.0166133	3	28.6707	28.8134	0.312286	0.0108922	3	28.7012	28.6285	0.409419	0.0142649	3	27.9485	28.2673	0.643319	0.023018	3	28.1881	27.9088	1.01609	0.0360466	3	27.183	27.4022	0.655912	0.0241295	3	28.2647	28.2647	0.250569	0.00886511	2	27.9633	27.7802	0.517433	0.018504	3	28.1462	28.0576	0.574223	0.0204015	3	28.3276	28.8134
P13807	Glycogen [starch] synthase, muscle	GYS1	27.2031	27.2031	NaN	NaN	1	27.5027	27.5027	NaN	NaN	1	NaN	NaN	NaN	NaN	0	NaN	NaN	NaN	NaN	0	NaN	NaN	NaN	NaN	0	27.151	27.151	NaN	NaN	1	NaN	NaN	NaN	NaN	0	NaN	NaN	NaN	NaN	0	NaN	NaN	NaN	NaN	0	NaN	27.5027
P13861	cAMP-dependent protein kinase type II-alpha regulatory subunit	PRKAR2A	29.2339	29.2339	NaN	NaN	1	NaN	NaN	NaN	NaN	0	28.9159	28.9159	NaN	NaN	1	NaN	NaN	NaN	NaN	0	NaN	NaN	NaN	NaN	0	28.1363	28.1363	NaN	NaN	1	29.2463	29.2463	NaN	NaN	1	28.0937	28.0937	NaN	NaN	1	NaN	NaN	NaN	NaN	0	29.2339	NaN
P13984	General transcription factor IIF subunit 2	GTF2F2	25.2829	25.2829	NaN	NaN	1	NaN	NaN	NaN	NaN	0	NaN	NaN	NaN	NaN	0	NaN	NaN	NaN	NaN	0	NaN	NaN	NaN	NaN	0	NaN	NaN	NaN	NaN	0	NaN	NaN	NaN	NaN	0	NaN	NaN	NaN	NaN	0	NaN	NaN	NaN	NaN	0	25.2829	NaN
P13995	Bifunctional methylenetetrahydrofolate dehydrogenase/cyclohydrolase, mitochondrial;NAD-dependent methylenetetrahydrofolate dehydrogenase;Methenyltetrahydrofolate cyclohydrolase	MTHFD2	NaN	NaN	NaN	NaN	0	NaN	NaN	NaN	NaN	0	NaN	NaN	NaN	NaN	0	NaN	NaN	NaN	NaN	0	NaN	NaN	NaN	NaN	0	NaN	NaN	NaN	NaN	0	27.6385	27.6385	0.117555	0.00425332	2	27.1011	27.1011	1.319	0.0486694	2	27.1576	27.1576	0.658157	0.0242348	2	NaN	NaN
P14174	Macrophage migration inhibitory factor	MIF	28.368	28.368	0.858154	0.0302507	2	28.0993	28.0146	0.698698	0.0248653	3	28.1685	28.1998	0.535187	0.0189995	3	28.3869	28.3869	1.33104	0.0468893	2	27.9333	28.3785	0.849742	0.0304204	3	28.3253	28.0553	1.01407	0.0358007	3	29.1513	29.313	0.446955	0.0153323	3	28.2331	28.5705	1.17829	0.0417345	3	28.4706	28.4706	NaN	NaN	1	NaN	27.4468
P14314	Glucosidase 2 subunit beta	PRKCSH	29.6735	29.9863	0.987662	0.0332843	3	29.6136	29.6253	0.0719621	0.00243003	3	29.5834	29.8236	0.653212	0.0220804	3	29.2612	29.6298	0.71456	0.02442	3	29.4183	29.4938	0.146993	0.00499665	3	29.3569	29.2875	0.917996	0.0312702	3	28.9666	28.9337	0.81647	0.0281866	3	29.8099	29.7478	0.258814	0.00868216	3	29.2878	29.1137	0.887126	0.0302899	3	29.9863	29.6253
P14324	Farnesyl pyrophosphate synthase	FDPS	27.7978	27.7978	0.0689347	0.00247986	2	27.9344	27.9344	0.0206027	0.000737541	2	27.5617	27.5617	NaN	NaN	1	NaN	NaN	NaN	NaN	0	27.9519	27.9519	0.211875	0.00758	2	27.7513	27.7513	0.50415	0.0181668	2	27.8567	27.8567	NaN	NaN	1	27.2107	27.2107	0.312531	0.0114856	2	NaN	NaN	NaN	NaN	0	27.8466	27.9198
P14543	Nidogen-1	NID1	28.1637	28.1637	NaN	NaN	1	27.8704	27.8704	0.130542	0.0046839	2	27.8205	27.8205	0.49101	0.0176492	2	NaN	NaN	NaN	NaN	0	26.969	26.969	NaN	NaN	1	27.4471	27.4471	NaN	NaN	1	NaN	NaN	NaN	NaN	0	NaN	NaN	NaN	NaN	0	NaN	NaN	NaN	NaN	0	NaN	27.9627
P14550	Alcohol dehydrogenase [NADP(+)]	AKR1A1	27.8328	27.8328	0.00157933	5.67434e-05	2	26.3033	26.3033	1.53948	0.0585279	2	26.5224	26.7035	0.54337	0.0204872	3	26.5375	26.1006	0.864294	0.0325688	3	26.9289	26.9289	0.676316	0.0251149	2	25.8602	25.8602	NaN	NaN	1	27.1174	27.1174	0.17237	0.00635646	2	26.2968	27.131	1.57642	0.059947	3	27.4309	27.618	0.655982	0.023914	3	NaN	27.3919
P14618	Pyruvate kinase PKM	PKM	31.4566	31.5085	0.174349	0.00554252	3	31.4254	31.499	0.197935	0.00629856	3	31.3052	31.28	0.122554	0.00391482	3	31.161	31.1239	0.185461	0.00595169	3	31.2562	31.3971	0.304518	0.00974263	3	30.8202	30.9468	0.253221	0.00821607	3	31.2464	31.2249	0.220094	0.00704381	3	31.155	31.1895	0.108997	0.00349854	3	31.2132	31.1095	0.187338	0.0060019	3	31.5085	31.499
P14625	Endoplasmin	HSP90B1	32.0065	31.9508	0.180714	0.00564616	3	32.2037	32.143	0.185416	0.0057576	3	32.0676	32.054	0.0236573	0.00073773	3	32.0747	32.1185	0.154846	0.00482765	3	31.9382	31.9447	0.261372	0.00818367	3	31.9793	31.9993	0.26432	0.00826534	3	32.0511	32.0074	0.0763953	0.00238355	3	31.848	31.784	0.211564	0.00664291	3	32.1215	32.1369	0.0409405	0.00127455	3	31.8602	32.143
P14649	Myosin light chain 6B	MYL6B	30.7824	30.9455	0.454059	0.0147506	3	30.6852	30.5768	0.310665	0.0101243	3	30.6628	30.6628	0.0755959	0.00246539	2	30.691	30.8025	0.396339	0.0129138	3	30.4862	30.4832	0.188492	0.00618285	3	30.0822	30.0822	0.0717818	0.00238619	2	30.4228	30.5324	0.200744	0.00659846	3	30.6978	30.6978	0.279508	0.00910515	2	31.4373	31.4373	NaN	NaN	1	30.9455	30.5768
P14735	Insulin-degrading enzyme	IDE	NaN	NaN	NaN	NaN	0	23.6112	23.6112	NaN	NaN	1	NaN	NaN	NaN	NaN	0	30.3851	30.3851	NaN	NaN	1	NaN	NaN	NaN	NaN	0	NaN	NaN	NaN	NaN	0	NaN	NaN	NaN	NaN	0	26.4316	26.4316	NaN	NaN	1	NaN	NaN	NaN	NaN	0	NaN	NaN
P14866	Heterogeneous nuclear ribonucleoprotein L	HNRNPL	28.7393	28.6097	1.11936	0.0389489	3	29.6108	29.5794	0.169363	0.00571963	3	29.8957	29.9837	0.207969	0.00695648	3	28.7107	29.3386	1.1778	0.041023	3	29.0015	29.544	1.02139	0.0352184	3	28.8055	29.0615	0.654268	0.0227133	3	28.6913	29.6484	1.94904	0.0679313	3	29.8386	29.8433	0.0225767	0.000756627	3	29.2223	29.0837	0.909609	0.0311272	3	27.6904	29.7937
P14868	Aspartate--tRNA ligase, cytoplasmic	DARS	27.7525	27.7525	0.175862	0.0063368	2	27.9871	27.9871	NaN	NaN	1	28.037	28.037	0.0544794	0.00194312	2	27.7752	27.7752	0.475193	0.0171085	2	28.2213	28.2213	0.892233	0.0316156	2	27.6411	27.6411	0.538541	0.0194833	2	28.3569	28.3569	NaN	NaN	1	NaN	NaN	NaN	NaN	0	NaN	NaN	NaN	NaN	0	27.8769	NaN
P14923	Junction plakoglobin	JUP	28.6283	27.9891	2.03547	0.0710997	3	29.393	28.8594	1.01354	0.0344824	3	28.7703	28.0942	1.67044	0.0580612	3	27.4777	27.7753	0.6384	0.0232334	3	27.3487	27.4883	0.567611	0.0207546	3	27.6649	27.7108	1.07621	0.0389016	3	28.0567	28.0567	0.548113	0.0195359	2	28.116	28.116	0.881357	0.0313471	2	27.3755	28.0437	1.70275	0.0621998	3	27.9891	28.8594
P14927	Cytochrome b-c1 complex subunit 7	UQCRB	28.8169	28.8152	0.561699	0.019492	3	29.0789	29.0789	0.0417341	0.0014352	2	28.9996	28.9996	0.18678	0.00644077	2	28.1108	28.1108	NaN	NaN	1	29.019	29.0317	0.445308	0.0153454	3	29.044	29.044	1.17669	0.0405141	2	28.468	28.468	0.241239	0.00847403	2	28.4736	28.4736	NaN	NaN	1	28.7985	28.7985	0.38441	0.0133483	2	28.2561	29.1084
P15056	Serine/threonine-protein kinase B-raf;RAF proto-oncogene serine/threonine-protein kinase	BRAF	NaN	NaN	NaN	NaN	0	NaN	NaN	NaN	NaN	0	NaN	NaN	NaN	NaN	0	NaN	NaN	NaN	NaN	0	NaN	NaN	NaN	NaN	0	26.3088	26.3088	NaN	NaN	1	NaN	NaN	NaN	NaN	0	NaN	NaN	NaN	NaN	0	NaN	NaN	NaN	NaN	0	NaN	NaN
P15104	Glutamine synthetase	GLUL	25.2192	25.2192	NaN	NaN	1	NaN	NaN	NaN	NaN	0	NaN	NaN	NaN	NaN	0	NaN	NaN	NaN	NaN	0	NaN	NaN	NaN	NaN	0	25.1337	25.1337	NaN	NaN	1	NaN	NaN	NaN	NaN	0	NaN	NaN	NaN	NaN	0	NaN	NaN	NaN	NaN	0	NaN	NaN
P15121	Aldose reductase	AKR1B1	NaN	NaN	NaN	NaN	0	NaN	NaN	NaN	NaN	0	NaN	NaN	NaN	NaN	0	30.7924	30.7924	NaN	NaN	1	NaN	NaN	NaN	NaN	0	NaN	NaN	NaN	NaN	0	30.5282	30.5282	0.194317	0.00636515	2	28.8431	28.8431	NaN	NaN	1	31.1013	31.1013	NaN	NaN	1	NaN	NaN
P15144	Aminopeptidase N	ANPEP	28.0401	28.0401	NaN	NaN	1	26.1037	26.1037	0.826978	0.0316805	2	30.45	32.2995	3.35663	0.110234	3	NaN	NaN	NaN	NaN	0	27.0093	27.0093	0.802572	0.0297147	2	30.6332	30.6332	1.95155	0.0637071	2	27.8871	27.8871	NaN	NaN	1	28.4564	28.4564	NaN	NaN	1	28.5753	28.5753	2.94632	0.103107	2	NaN	NaN
P15169	Carboxypeptidase N catalytic chain	CPN1	27.5591	27.5591	NaN	NaN	1	29.4819	28.9928	0.961031	0.0325974	3	28.3091	28.3731	0.313873	0.0110874	3	28.7216	28.4821	0.460973	0.0160497	3	28.9603	28.9603	1.23403	0.042611	2	29.2902	29.2902	NaN	NaN	1	29.0609	29.0609	1.47439	0.0507344	2	NaN	NaN	NaN	NaN	0	30.9741	30.9741	NaN	NaN	1	27.5591	28.8638
P15170	Eukaryotic peptide chain release factor GTP-binding subunit ERF3A	GSPT1	27.5104	27.4441	0.490283	0.0178218	3	27.4551	27.3266	1.3167	0.0479584	3	27.6046	27.6022	0.949335	0.0343904	3	28.0097	28.0097	NaN	NaN	1	27.1687	27.086	0.188425	0.00693536	3	27.2913	27.2913	NaN	NaN	1	NaN	NaN	NaN	NaN	0	27.9663	27.9663	0.0890587	0.0031845	2	NaN	NaN	NaN	NaN	0	28.0304	27.3266
P15291	Beta-1,4-galactosyltransferase 1;Lactose synthase A protein;N-acetyllactosamine synthase;Beta-N-acetylglucosaminylglycopeptide beta-1,4-galactosyltransferase;Beta-N-acetylglucosaminyl-glycolipid beta-1,4-galactosyltransferase;Processed beta-1,4-galactosyltransferase 1	B4GALT1	NaN	NaN	NaN	NaN	0	NaN	NaN	NaN	NaN	0	NaN	NaN	NaN	NaN	0	NaN	NaN	NaN	NaN	0	32.0516	32.0516	NaN	NaN	1	NaN	NaN	NaN	NaN	0	31.7865	31.7865	NaN	NaN	1	NaN	NaN	NaN	NaN	0	NaN	NaN	NaN	NaN	0	NaN	NaN
P15311	Ezrin	EZR	30.7205	30.7005	0.0935861	0.00304637	3	30.6495	30.6217	0.217945	0.00711088	3	30.8421	30.8806	0.0716512	0.00232316	3	30.7045	30.7916	0.156131	0.00508495	3	30.7348	30.9188	0.546289	0.0177743	3	30.9153	31.0582	0.342887	0.0110912	3	30.3742	30.5046	0.270197	0.00889561	3	30.6586	30.6727	0.123542	0.00402961	3	30.5243	30.6494	0.307781	0.0100831	3	30.8224	30.8801
P15374	Ubiquitin carboxyl-terminal hydrolase isozyme L3	UCHL3	NaN	NaN	NaN	NaN	0	NaN	NaN	NaN	NaN	0	26.0576	26.0576	NaN	NaN	1	NaN	NaN	NaN	NaN	0	24.9036	24.9036	NaN	NaN	1	NaN	NaN	NaN	NaN	0	NaN	NaN	NaN	NaN	0	NaN	NaN	NaN	NaN	0	NaN	NaN	NaN	NaN	0	NaN	NaN
P15531	Nucleoside diphosphate kinase A	NME1	31.572	31.5599	0.0919582	0.00291265	3	31.7317	31.7432	0.119773	0.00377454	3	31.824	31.7811	0.0747106	0.00234762	3	31.4363	31.3461	0.307562	0.00978364	3	31.633	31.6958	0.165505	0.00523204	3	31.0653	31.1443	0.223077	0.00718092	3	32.1435	32.1516	0.0310357	0.000965538	3	31.8189	31.8415	0.285174	0.0089624	3	31.8433	31.5892	0.475822	0.0149426	3	31.6694	31.8453
P15559	NAD(P)H dehydrogenase [quinone] 1	NQO1	29.0505	29.1508	0.336146	0.0115711	3	28.271	28.3332	0.29631	0.0104811	3	28.5282	28.4386	0.38085	0.0133499	3	28.2708	28.1065	0.314995	0.0111421	3	29.1449	29.1889	0.208862	0.00716634	3	28.791	29.1314	0.632296	0.0219616	3	30.615	30.615	0.553547	0.0180809	2	29.1373	29.2632	0.650463	0.0223241	3	29.6611	29.5217	0.683573	0.0230461	3	28.6757	28.5312
P15586	N-acetylglucosamine-6-sulfatase	GNS	NaN	NaN	NaN	NaN	0	25.9683	25.9683	NaN	NaN	1	NaN	NaN	NaN	NaN	0	NaN	NaN	NaN	NaN	0	NaN	NaN	NaN	NaN	0	NaN	NaN	NaN	NaN	0	25.1479	25.1479	NaN	NaN	1	NaN	NaN	NaN	NaN	0	NaN	NaN	NaN	NaN	0	NaN	25.9683
P15880	40S ribosomal protein S2	RPS2	30.4302	30.4054	0.190783	0.00626952	3	30.3161	30.3005	0.155083	0.00511553	3	30.3431	30.2551	0.178748	0.00589091	3	30.5339	30.3702	0.337604	0.0110567	3	30.1866	29.8845	0.608897	0.0201711	3	30.0723	30.2443	0.463626	0.015417	3	30.1743	30.0657	0.452972	0.0150118	3	29.8502	29.651	0.547976	0.0183576	3	30.1702	30.1527	0.325975	0.0108045	3	30.4054	30.4784
P15924	Desmoplakin	DSP	27.4045	26.7977	1.61957	0.0590986	3	28.2206	27.5116	1.84525	0.0653868	3	29.0761	29.0761	2.10211	0.072297	2	25.7713	25.4807	0.710872	0.0275838	3	25.7493	25.7493	1.64193	0.063766	2	26.7606	26.9516	1.03852	0.0388078	3	NaN	NaN	NaN	NaN	0	26.8861	26.8861	0.385829	0.0143505	2	26.4862	26.4862	NaN	NaN	1	26.7977	27.5116
P15927	Replication protein A 32 kDa subunit	RPA2	26.1856	26.2182	0.769049	0.0293691	3	25.4409	25.4409	NaN	NaN	1	26.555	26.4297	0.310767	0.0117028	3	25.7075	25.7075	0.108252	0.00421092	2	25.0999	24.9466	0.26589	0.0105933	3	25.8699	25.5151	0.846884	0.0327363	3	25.8633	25.8633	NaN	NaN	1	26.5415	26.5415	NaN	NaN	1	NaN	NaN	NaN	NaN	0	26.9379	25.4409
P15954	Cytochrome c oxidase subunit 7C, mitochondrial	COX7C	NaN	NaN	NaN	NaN	0	NaN	NaN	NaN	NaN	0	NaN	NaN	NaN	NaN	0	28.1653	28.1653	NaN	NaN	1	28.1456	28.1456	NaN	NaN	1	NaN	NaN	NaN	NaN	0	28.005	28.0283	0.154712	0.00552443	3	28.4319	28.4319	NaN	NaN	1	27.948	27.948	0.753348	0.0269554	2	NaN	NaN
P16070	CD44 antigen	CD44	28.4244	28.3327	0.205181	0.00721847	3	28.663	28.4945	0.308517	0.0107636	3	28.3717	28.5255	0.340415	0.0119984	3	28.5846	28.4126	0.586335	0.0205123	3	28.3504	28.569	0.750937	0.0264877	3	28.169	28.1472	0.173781	0.00616924	3	27.114	26.6043	1.01251	0.0373428	3	28.4109	28.4109	0.287048	0.0101035	2	27.167	27.167	0.610927	0.0224878	2	28.6594	28.4754
P16144	Integrin beta-4	ITGB4	NaN	NaN	NaN	NaN	0	25.4384	25.4384	NaN	NaN	1	25.2995	25.2995	0.430522	0.017017	2	NaN	NaN	NaN	NaN	0	26.1046	26.1046	NaN	NaN	1	NaN	NaN	NaN	NaN	0	25.7874	25.7874	NaN	NaN	1	24.6009	24.6009	NaN	NaN	1	26.0861	26.0861	NaN	NaN	1	NaN	NaN
P16219	Short-chain specific acyl-CoA dehydrogenase, mitochondrial	ACADS	27.2536	27.2536	NaN	NaN	1	NaN	NaN	NaN	NaN	0	25.5892	25.5892	NaN	NaN	1	NaN	NaN	NaN	NaN	0	NaN	NaN	NaN	NaN	0	26.2532	26.2532	NaN	NaN	1	25.3279	25.3279	NaN	NaN	1	NaN	NaN	NaN	NaN	0	NaN	NaN	NaN	NaN	0	27.2536	NaN
P16278	Beta-galactosidase	GLB1	NaN	NaN	NaN	NaN	0	NaN	NaN	NaN	NaN	0	NaN	NaN	NaN	NaN	0	NaN	NaN	NaN	NaN	0	24.6245	24.6245	NaN	NaN	1	25.3598	25.3598	NaN	NaN	1	NaN	NaN	NaN	NaN	0	NaN	NaN	NaN	NaN	0	NaN	NaN	NaN	NaN	0	NaN	NaN
P16298	Serine/threonine-protein phosphatase 2B catalytic subunit beta isoform	PPP3CB	NaN	NaN	NaN	NaN	0	NaN	NaN	NaN	NaN	0	NaN	NaN	NaN	NaN	0	NaN	NaN	NaN	NaN	0	27.1066	27.1066	NaN	NaN	1	NaN	NaN	NaN	NaN	0	NaN	NaN	NaN	NaN	0	NaN	NaN	NaN	NaN	0	NaN	NaN	NaN	NaN	0	NaN	NaN
P16401	Histone H1.5	HIST1H1B	NaN	NaN	NaN	NaN	0	NaN	NaN	NaN	NaN	0	NaN	NaN	NaN	NaN	0	NaN	NaN	NaN	NaN	0	NaN	NaN	NaN	NaN	0	25.9342	25.9342	0.454854	0.0175388	2	NaN	NaN	NaN	NaN	0	NaN	NaN	NaN	NaN	0	NaN	NaN	NaN	NaN	0	NaN	NaN
P16403	Histone H1.2	HIST1H1C	29.1477	29.1477	NaN	NaN	1	29.3877	29.3877	NaN	NaN	1	29.7324	29.7324	NaN	NaN	1	29.3585	29.3585	0.176704	0.00601882	2	29.5039	29.5039	NaN	NaN	1	29.5127	29.4508	0.268617	0.00910174	3	29.4875	29.4875	0.612207	0.0207616	2	29.4263	29.4263	0.0887282	0.00301526	2	29.1656	29.1656	0.581899	0.0199515	2	NaN	29.3877
P16435	NADPH--cytochrome P450 reductase	POR	NaN	NaN	NaN	NaN	0	26.1624	26.1624	NaN	NaN	1	26.5024	26.5024	NaN	NaN	1	NaN	NaN	NaN	NaN	0	NaN	NaN	NaN	NaN	0	26.1203	26.1203	0.158038	0.00605038	2	NaN	NaN	NaN	NaN	0	NaN	NaN	NaN	NaN	0	NaN	NaN	NaN	NaN	0	NaN	NaN
P16615	Sarcoplasmic/endoplasmic reticulum calcium ATPase 2	ATP2A2	27.817	27.7237	0.467974	0.0168233	3	28.2125	28.2125	0.34632	0.0122754	2	27.6809	27.9496	0.700978	0.0253235	3	28.2551	28.2551	0.136506	0.00483119	2	28.162	28.162	NaN	NaN	1	28.5503	28.5503	0.694243	0.0243165	2	28.0679	28.0376	0.113581	0.00404663	3	27.9153	27.7441	0.488578	0.0175022	3	28.3628	28.3628	0.101592	0.00358188	2	27.7237	NaN
P16930	Fumarylacetoacetase	FAH	NaN	NaN	NaN	NaN	0	27.1409	27.1409	NaN	NaN	1	NaN	NaN	NaN	NaN	0	NaN	NaN	NaN	NaN	0	NaN	NaN	NaN	NaN	0	NaN	NaN	NaN	NaN	0	NaN	NaN	NaN	NaN	0	24.822	24.822	NaN	NaN	1	NaN	NaN	NaN	NaN	0	NaN	NaN
P16949	Stathmin	STMN1	30.6992	30.855	0.288798	0.00940734	3	30.7179	30.7345	0.206811	0.00673259	3	30.5705	30.5802	0.247435	0.00809391	3	30.8372	30.9309	0.371403	0.012044	3	29.7604	30.2472	1.00607	0.0338059	3	30.4903	30.5644	0.550094	0.0180416	3	30.4776	30.7159	0.481926	0.0158125	3	29.8995	29.8421	0.69416	0.0232165	3	30.0041	29.7963	0.480447	0.0160127	3	30.366	30.9158
P16989	Y-box-binding protein 3	YBX3	28.2963	28.2963	0.00151594	5.35736e-05	2	28.0627	28.0627	0.244813	0.00872381	2	28.4632	28.2374	0.511852	0.0179829	3	27.9004	27.9004	0.404055	0.0144821	2	28.6058	28.3624	0.807033	0.0282123	3	27.8804	27.8804	0.626317	0.0224644	2	28.5984	28.5984	0.133362	0.00466327	2	28.4543	28.4543	0.456183	0.0160321	2	29.096	29.096	NaN	NaN	1	28.2974	27.8895
P17066	Heat shock 70 kDa protein 6;Putative heat shock 70 kDa protein 7	HSPA6	31.0957	31.3287	0.447803	0.0144008	3	31.0184	31.0982	0.179625	0.00579093	3	30.9014	30.9537	0.165882	0.00536812	3	31.3473	31.5566	0.384125	0.0122538	3	31.4198	31.3225	0.199084	0.00633627	3	31.7133	31.6895	0.221978	0.00699953	3	31.3803	31.416	0.127823	0.00407337	3	31.1764	31.3255	0.363783	0.0116685	3	31.2773	31.2403	0.131104	0.00419168	3	30.5794	31.1442
P17174	Aspartate aminotransferase, cytoplasmic	GOT1	28.4817	28.4817	0.122532	0.00430213	2	28.2286	28.2286	0.458289	0.0162349	2	28.4189	28.2761	0.306342	0.0107795	3	27.8608	27.8608	NaN	NaN	1	28.8725	28.9294	0.229627	0.00795314	3	27.3383	27.3383	0.644414	0.0235718	2	NaN	NaN	NaN	NaN	0	28.8514	28.8514	NaN	NaN	1	28.8249	28.7872	0.965468	0.0334942	3	28.5683	NaN
P17301	Integrin alpha-2	ITGA2	27.5356	27.5356	NaN	NaN	1	NaN	NaN	NaN	NaN	0	26.8311	26.8311	NaN	NaN	1	29.1036	29.1036	NaN	NaN	1	NaN	NaN	NaN	NaN	0	NaN	NaN	NaN	NaN	0	26.1036	26.1036	NaN	NaN	1	26.6141	26.6141	NaN	NaN	1	26.0717	26.0717	NaN	NaN	1	27.5356	NaN
P17480	Nucleolar transcription factor 1	UBTF	NaN	NaN	NaN	NaN	0	28.5873	28.5873	NaN	NaN	1	NaN	NaN	NaN	NaN	0	NaN	NaN	NaN	NaN	0	NaN	NaN	NaN	NaN	0	NaN	NaN	NaN	NaN	0	NaN	NaN	NaN	NaN	0	NaN	NaN	NaN	NaN	0	26.2671	26.2671	NaN	NaN	1	NaN	NaN
P17612	cAMP-dependent protein kinase catalytic subunit alpha	PRKACA	25.9117	25.9117	0.266284	0.0102766	2	26.4009	26.4009	NaN	NaN	1	26.0738	26.0738	NaN	NaN	1	NaN	NaN	NaN	NaN	0	NaN	NaN	NaN	NaN	0	NaN	NaN	NaN	NaN	0	29.2712	29.2712	NaN	NaN	1	NaN	NaN	NaN	NaN	0	NaN	NaN	NaN	NaN	0	25.7234	26.4009
P17655	Calpain-2 catalytic subunit	CAPN2	26.4496	26.3424	0.302458	0.0114353	3	26.2765	26.2765	0.0440337	0.00167578	2	25.9945	25.9945	0.32937	0.0126707	2	26.1056	26.1056	0.0427079	0.00163597	2	27.0184	27.0184	0.802726	0.0297104	2	25.961	25.961	0.076246	0.00293695	2	NaN	NaN	NaN	NaN	0	NaN	NaN	NaN	NaN	0	NaN	NaN	NaN	NaN	0	26.2153	26.2454
P17812	CTP synthase 1	CTPS1	27.5769	27.2998	0.504145	0.0182814	3	28.5381	28.5026	0.11677	0.00409171	3	28.7497	28.8855	0.580595	0.0201948	3	28.115	28.115	0.463911	0.0165005	2	28.3421	28.7546	0.735424	0.0259481	3	28.0843	28.3807	0.565499	0.0201358	3	28.176	28.176	0.321171	0.0113988	2	27.8255	27.8398	0.0605185	0.00217493	3	28.585	28.585	NaN	NaN	1	27.2998	28.5026
P17844	Probable ATP-dependent RNA helicase DDX5	DDX5	28.9176	28.607	0.551845	0.0190834	3	29.4582	29.6205	0.461875	0.015679	3	29.0048	28.9065	0.58042	0.0200112	3	29.1275	29.2112	0.241017	0.00827455	3	28.5139	28.8742	0.984799	0.0345375	3	28.9175	29.1329	0.671466	0.0232201	3	29.014	28.9936	0.16495	0.00568521	3	28.7489	28.7169	0.318437	0.0110765	3	28.5132	28.9365	0.751946	0.0263719	3	29.5547	28.937
P17858	ATP-dependent 6-phosphofructokinase, liver type	PFKL	27.0233	27.027	0.132184	0.00489149	3	26.9437	26.9437	0.0207848	0.000771417	2	26.6058	26.6058	NaN	NaN	1	NaN	NaN	NaN	NaN	0	26.6461	26.6327	0.656991	0.0246562	3	26.2125	26.2125	0.544976	0.0207906	2	NaN	NaN	NaN	NaN	0	NaN	NaN	NaN	NaN	0	NaN	NaN	NaN	NaN	0	27.1535	26.9584
P17931	Galectin-3	LGALS3	27.9491	27.9491	0.505805	0.0180974	2	27.334	27.3581	0.288232	0.0105448	3	27.8359	27.7897	0.128873	0.00462973	3	27.7134	27.7134	0.371509	0.0134054	2	28.045	28.045	NaN	NaN	1	27.5484	27.5484	0.00576839	0.000209391	2	NaN	NaN	NaN	NaN	0	NaN	NaN	NaN	NaN	0	NaN	NaN	NaN	NaN	0	28.3067	27.0345
P17980	26S protease regulatory subunit 6A	PSMC3	NaN	NaN	NaN	NaN	0	NaN	NaN	NaN	NaN	0	27.7571	27.7571	1.00487	0.0362023	2	NaN	NaN	NaN	NaN	0	28.3632	28.3632	0.551925	0.0194592	2	NaN	NaN	NaN	NaN	0	NaN	NaN	NaN	NaN	0	NaN	NaN	NaN	NaN	0	NaN	NaN	NaN	NaN	0	NaN	NaN
P17987	T-complex protein 1 subunit alpha	TCP1	29.6571	29.6595	0.047341	0.00159628	3	29.9116	29.8804	0.208068	0.00695609	3	29.7126	29.577	0.357027	0.012016	3	29.5323	29.5994	0.467342	0.0158248	3	29.8371	30.1393	0.652882	0.0218816	3	29.8303	29.9272	0.296446	0.00993774	3	29.303	29.9078	1.13255	0.0386496	3	29.7208	29.7755	0.098196	0.00330395	3	29.6677	29.4907	0.34327	0.0115705	3	29.6595	29.8804
P18031	Tyrosine-protein phosphatase non-receptor type 1	PTPN1	NaN	NaN	NaN	NaN	0	NaN	NaN	NaN	NaN	0	25.8342	25.8342	NaN	NaN	1	NaN	NaN	NaN	NaN	0	26.1441	26.1441	NaN	NaN	1	NaN	NaN	NaN	NaN	0	NaN	NaN	NaN	NaN	0	NaN	NaN	NaN	NaN	0	NaN	NaN	NaN	NaN	0	NaN	NaN
P18077	60S ribosomal protein L35a	RPL35A	29.3859	29.2659	0.390391	0.013285	3	28.6909	28.7578	0.511199	0.0178174	3	29.3944	29.3944	0.216375	0.00736109	2	28.6789	28.6789	0.360955	0.0125861	2	28.9918	28.8373	0.533119	0.0183886	3	28.9327	28.5775	0.626483	0.0216531	3	29.2405	29.4733	0.540101	0.018471	3	29.349	29.349	0.817836	0.0278659	2	29.0981	29.1792	1.03241	0.0354803	3	29.2659	29.1655
P18085	ADP-ribosylation factor 4	ARF4	30.1657	29.9882	0.94904	0.0314608	3	28.7532	29.2682	0.926676	0.0322286	3	29.3761	29.3836	0.994095	0.0338402	3	28.6499	28.8267	0.557811	0.0194699	3	29.9009	29.3759	1.07564	0.0359736	3	28.707	28.707	0.961061	0.0334783	2	29.7214	29.7214	0.0932491	0.00313744	2	29.8143	29.8649	0.0899213	0.00301604	3	29.2376	29.4448	0.712786	0.0243791	3	29.9882	29.2682
P18124	60S ribosomal protein L7	RPL7	29.3532	29.3532	0.304447	0.0103719	2	28.7501	29.2023	0.83286	0.028969	3	29.2406	28.9072	0.629243	0.0215195	3	29.4661	29.4302	1.19528	0.0405648	3	29.4509	28.9973	0.996376	0.0338318	3	29.6728	29.2045	1.17264	0.0395191	3	31.0767	31.1123	0.0936321	0.00301293	3	30.4638	30.6467	0.496254	0.0162899	3	30.053	30.7207	1.42065	0.0472715	3	29.1379	29.259
P18206	Vinculin	VCL	29.5252	29.5368	0.442743	0.0149954	3	29.5753	29.6391	0.187663	0.00634524	3	29.7697	29.8033	0.111105	0.00373216	3	29.4164	28.9075	0.891206	0.0302962	3	29.9462	30.1907	0.427371	0.0142713	3	29.3423	29.6535	0.698896	0.0238187	3	28.6829	29.459	1.98225	0.069109	3	29.5873	29.8491	0.481568	0.0162762	3	30.1736	30.2458	0.988308	0.0327541	3	29.9621	29.7228
P18428	Lipopolysaccharide-binding protein	LBP	26.3539	26.3539	0.62096	0.0235623	2	29.8848	30.2123	1.34257	0.0449248	3	28.5729	29.4663	1.98387	0.0694319	3	28.2333	27.588	1.94558	0.0689108	3	29.1155	29.367	0.696607	0.0239256	3	28.9327	28.0133	1.68385	0.058199	3	29.0356	29.5703	1.35148	0.0465458	3	31.0447	30.9243	0.273888	0.00882237	3	30.8719	30.724	1.35412	0.0438626	3	26.793	30.2123
P18564	Integrin beta-6	ITGB6	28.1931	28.1469	0.354588	0.0125771	3	NaN	NaN	NaN	NaN	0	28.3475	28.359	0.191221	0.00674559	3	28.1774	28.1774	0.665095	0.0236039	2	NaN	NaN	NaN	NaN	0	29.0396	29.0396	NaN	NaN	1	27.9834	28.2006	0.84524	0.0302051	3	28.4118	28.4118	NaN	NaN	1	27.8498	27.8498	0.605044	0.0217252	2	28.1469	NaN
P18583	Protein SON	SON	NaN	NaN	NaN	NaN	0	NaN	NaN	NaN	NaN	0	NaN	NaN	NaN	NaN	0	23.329	23.329	NaN	NaN	1	27.2576	27.2576	NaN	NaN	1	NaN	NaN	NaN	NaN	0	NaN	NaN	NaN	NaN	0	NaN	NaN	NaN	NaN	0	NaN	NaN	NaN	NaN	0	NaN	NaN
P18621	60S ribosomal protein L17	RPL17	28.8157	28.9571	0.651956	0.022625	3	28.365	28.3283	1.32849	0.0468358	3	28.8394	28.8829	0.402349	0.0139514	3	28.3143	28.6408	0.610968	0.0215781	3	28.8328	29.2405	0.816462	0.0283172	3	28.4087	28.4087	0.746599	0.0262807	2	28.1911	28.3819	0.79726	0.0282805	3	28.3588	28.507	0.340529	0.0120079	3	28.4621	28.3309	0.308048	0.0108231	3	28.1046	29.7114
P18669	Phosphoglycerate mutase 1;Phosphoglycerate mutase 2	PGAM1	29.9039	30.2339	0.669855	0.0224003	3	30.0534	30.0093	0.12403	0.004127	3	30.0663	30.1703	0.205885	0.00684772	3	28.5234	28.2704	0.460333	0.0161388	3	28.9767	29.0819	0.410315	0.0141602	3	29.809	29.9765	0.597799	0.0200543	3	29.0538	29.0253	0.509416	0.0175335	3	29.4628	29.3762	0.240999	0.00817975	3	29.3371	29.1567	0.312971	0.0106681	3	30.3448	30.1934
P18754	Regulator of chromosome condensation	RCC1	26.1528	26.1528	NaN	NaN	1	NaN	NaN	NaN	NaN	0	NaN	NaN	NaN	NaN	0	NaN	NaN	NaN	NaN	0	26.4644	26.4644	NaN	NaN	1	NaN	NaN	NaN	NaN	0	27.3489	27.3489	NaN	NaN	1	29.3933	29.3933	3.1365	0.106708	2	NaN	NaN	NaN	NaN	0	26.1528	NaN
P19105	Myosin regulatory light chain 12A;Myosin regulatory light chain 12B;Myosin regulatory light polypeptide 9	MYL12A	28.1569	28.1569	0.283074	0.0100535	2	27.662	27.361	0.851058	0.0307664	3	27.826	27.826	0.621942	0.0223511	2	28.4709	28.4709	0.521849	0.0183292	2	28.2947	28.2954	0.433922	0.0153358	3	28.1065	28.1065	0.810296	0.0288295	2	28.5564	28.631	0.787449	0.0275752	3	28.2273	28.2273	0.11434	0.00405069	2	27.9494	28.3745	0.799765	0.0286147	3	28.357	27.361
P19338	Nucleolin	NCL	31.7051	31.7024	0.0105139	0.000331615	3	31.5866	31.5735	0.0349208	0.00110556	3	31.673	31.6369	0.153228	0.00483783	3	31.6562	31.6758	0.210647	0.0066542	3	31.5503	31.5175	0.300395	0.00952114	3	31.442	31.3759	0.135124	0.00429756	3	31.7964	31.7467	0.256641	0.00807139	3	31.4546	31.3686	0.479774	0.0152529	3	31.6078	31.6856	0.151782	0.00480203	3	31.7167	31.5601
P19367	Hexokinase-1	HK1	25.6318	25.6318	NaN	NaN	1	25.9264	25.9264	NaN	NaN	1	25.3406	25.3406	NaN	NaN	1	NaN	NaN	NaN	NaN	0	NaN	NaN	NaN	NaN	0	26.7534	26.7534	NaN	NaN	1	NaN	NaN	NaN	NaN	0	26.8796	26.8796	NaN	NaN	1	25.8811	25.8811	NaN	NaN	1	25.6318	25.9264
P19387	DNA-directed RNA polymerase II subunit RPB3	POLR2C	25.8129	25.8129	NaN	NaN	1	NaN	NaN	NaN	NaN	0	25.019	25.0372	0.132563	0.0052985	3	NaN	NaN	NaN	NaN	0	25.2	25.2	NaN	NaN	1	NaN	NaN	NaN	NaN	0	24.5168	24.5168	NaN	NaN	1	25.0622	25.0622	0.433174	0.0172839	2	25.633	25.633	NaN	NaN	1	NaN	NaN
P19404	NADH dehydrogenase [ubiquinone] flavoprotein 2, mitochondrial	NDUFV2	24.2682	24.2682	NaN	NaN	1	24.6776	24.6776	NaN	NaN	1	NaN	NaN	NaN	NaN	0	NaN	NaN	NaN	NaN	0	25.7139	25.7139	NaN	NaN	1	NaN	NaN	NaN	NaN	0	NaN	NaN	NaN	NaN	0	25.2263	25.2263	NaN	NaN	1	NaN	NaN	NaN	NaN	0	NaN	NaN
P19440	Gamma-glutamyltranspeptidase 1;Gamma-glutamyltranspeptidase 1 heavy chain;Gamma-glutamyltranspeptidase 1 light chain;Putative gamma-glutamyltranspeptidase 3;Putative gamma-glutamyltranspeptidase 3 heavy chain;Putative gamma-glutamyltranspeptidase 3 light chain;Inactive gamma-glutamyltranspeptidase 2	GGT1	29.3162	29.3162	NaN	NaN	1	NaN	NaN	NaN	NaN	0	29.7253	29.7253	0.44556	0.0149893	2	NaN	NaN	NaN	NaN	0	NaN	NaN	NaN	NaN	0	29.4317	29.4317	0.519077	0.0176366	2	NaN	NaN	NaN	NaN	0	NaN	NaN	NaN	NaN	0	NaN	NaN	NaN	NaN	0	29.3162	NaN
P19525	Interferon-induced, double-stranded RNA-activated protein kinase	EIF2AK2	26.5658	26.5658	NaN	NaN	1	26.2695	26.2695	NaN	NaN	1	25.6851	25.6851	NaN	NaN	1	25.7007	25.7007	NaN	NaN	1	NaN	NaN	NaN	NaN	0	NaN	NaN	NaN	NaN	0	NaN	NaN	NaN	NaN	0	25.7558	25.7558	NaN	NaN	1	NaN	NaN	NaN	NaN	0	26.5658	NaN
P19623	Spermidine synthase	SRM	NaN	NaN	NaN	NaN	0	NaN	NaN	NaN	NaN	0	NaN	NaN	NaN	NaN	0	NaN	NaN	NaN	NaN	0	28.2052	28.2052	NaN	NaN	1	NaN	NaN	NaN	NaN	0	NaN	NaN	NaN	NaN	0	28.889	28.889	NaN	NaN	1	NaN	NaN	NaN	NaN	0	NaN	NaN
P19652	Alpha-1-acid glycoprotein 2	ORM2	30.6873	30.9725	0.576764	0.0187948	3	29.9833	30.2238	1.23985	0.0413513	3	30.4918	30.6346	0.382299	0.0125378	3	31.7328	31.3152	0.834848	0.0263087	3	31.1323	30.7956	1.57331	0.0505363	3	30.0748	30.0743	1.37652	0.0457699	3	30.9568	30.3199	1.67522	0.0541149	3	29.7279	29.7948	0.177376	0.00596665	3	30.5845	30.9622	2.64392	0.0864465	3	30.9725	30.2238
P19784	Casein kinase II subunit alpha	CSNK2A2	NaN	NaN	NaN	NaN	0	27.4273	27.4273	NaN	NaN	1	27.6203	27.6203	0.734585	0.0265958	2	NaN	NaN	NaN	NaN	0	NaN	NaN	NaN	NaN	0	NaN	NaN	NaN	NaN	0	NaN	NaN	NaN	NaN	0	NaN	NaN	NaN	NaN	0	NaN	NaN	NaN	NaN	0	NaN	27.4273
P19823	Inter-alpha-trypsin inhibitor heavy chain H2	ITIH2	32.0393	31.7191	0.592014	0.0184777	3	32.8255	32.6589	0.312378	0.00951632	3	31.4913	31.4832	0.0914475	0.0029039	3	33.3112	33.2352	0.381001	0.0114376	3	31.2617	31.0686	1.60317	0.0512821	3	31.4364	31.4705	0.788584	0.025085	3	32.9471	32.6579	0.890749	0.0270357	3	31.3679	32.4919	2.01612	0.0642733	3	31.4304	32.5621	2.85093	0.0907063	3	32.7225	33.1859
P19827	Inter-alpha-trypsin inhibitor heavy chain H1	ITIH1	31.9793	32.1987	0.443305	0.0138623	3	32.2795	32.2728	0.100834	0.00312378	3	30.9293	30.6506	0.487527	0.0157626	3	32.6839	32.7821	0.556241	0.0170188	3	31.1944	30.4198	1.40923	0.0451758	3	31.4537	31.6179	0.317279	0.0100872	3	32.4263	32.0455	0.940619	0.0290079	3	31.6497	31.8938	0.448065	0.014157	3	30.6632	31.9378	3.15145	0.102776	3	32.2701	32.3835
P20042	Eukaryotic translation initiation factor 2 subunit 2	EIF2S2	27.6426	27.6254	0.402032	0.0145439	3	27.8498	27.8498	NaN	NaN	1	27.3962	27.3962	NaN	NaN	1	NaN	NaN	NaN	NaN	0	NaN	NaN	NaN	NaN	0	27.0172	27.0172	NaN	NaN	1	27.3955	27.3955	0.255932	0.0093421	2	27.5917	27.5917	NaN	NaN	1	27.3116	27.3116	NaN	NaN	1	27.2494	27.8498
P20073	Annexin A7	ANXA7	24.6571	24.6571	NaN	NaN	1	NaN	NaN	NaN	NaN	0	NaN	NaN	NaN	NaN	0	NaN	NaN	NaN	NaN	0	31.5674	31.5674	NaN	NaN	1	NaN	NaN	NaN	NaN	0	32.3085	32.3085	NaN	NaN	1	NaN	NaN	NaN	NaN	0	NaN	NaN	NaN	NaN	0	NaN	NaN
P20290	Transcription factor BTF3	BTF3	28.7234	28.7234	0.586864	0.0204316	2	28.1125	28.1125	NaN	NaN	1	28.4198	28.3948	0.202125	0.0071121	3	28.4911	28.4911	NaN	NaN	1	28.3469	28.3469	0.253394	0.00893902	2	28.0126	28.0126	0.0956524	0.00341462	2	28.7941	28.7941	NaN	NaN	1	29.2155	29.2155	1.03975	0.0355889	2	28.7337	28.7337	0.316355	0.0110099	2	29.1383	28.1125
P20339	Ras-related protein Rab-5A	RAB5A	28.3981	28.2538	0.469844	0.0165449	3	28.0952	28.1602	0.318826	0.011348	3	28.3553	28.3258	0.245926	0.00867302	3	28.0503	28.0503	0.291442	0.01039	2	27.992	27.6863	0.531775	0.0189974	3	28.4302	28.4302	1.07284	0.0377358	2	28.5252	28.5252	0.444537	0.015584	2	28.509	28.4385	0.480587	0.0168574	3	28.8574	28.8787	0.176906	0.00613035	3	28.0173	28.1602
P20340	Ras-related protein Rab-6A	RAB6A	27.9377	27.9377	0.30225	0.0108187	2	NaN	NaN	NaN	NaN	0	27.2042	27.2042	1.25621	0.0461771	2	NaN	NaN	NaN	NaN	0	26.5795	26.5795	NaN	NaN	1	NaN	NaN	NaN	NaN	0	NaN	NaN	NaN	NaN	0	NaN	NaN	NaN	NaN	0	NaN	NaN	NaN	NaN	0	28.1514	NaN
P20618	Proteasome subunit beta type-1	PSMB1	27.814	27.814	NaN	NaN	1	28.7674	28.6162	0.658288	0.0228831	3	27.6541	28.0654	0.928832	0.0335875	3	26.5447	26.5447	NaN	NaN	1	27.5929	27.8289	0.589772	0.0213741	3	25.8623	25.8623	NaN	NaN	1	NaN	NaN	NaN	NaN	0	29.9816	29.9816	1.10231	0.0367664	2	28.0659	28.0659	0.545074	0.0194213	2	NaN	28.1979
P20648	Potassium-transporting ATPase alpha chain 1	ATP4A	27.7861	27.7861	0.801663	0.0288512	2	28.3753	28.3753	0.595026	0.0209698	2	27.4042	27.4042	0.374054	0.0136495	2	NaN	NaN	NaN	NaN	0	28.0655	28.0655	0.0528731	0.00188392	2	26.7285	26.7285	0.77026	0.028818	2	NaN	NaN	NaN	NaN	0	27.269	27.269	NaN	NaN	1	NaN	NaN	NaN	NaN	0	28.353	NaN
P20674	Cytochrome c oxidase subunit 5A, mitochondrial	COX5A	NaN	NaN	NaN	NaN	0	26.7475	26.7475	NaN	NaN	1	26.6641	26.6641	0.032327	0.00121238	2	27.4568	27.4568	NaN	NaN	1	27.048	27.048	0.539431	0.0199435	2	26.7841	26.8836	0.175023	0.00653458	3	NaN	NaN	NaN	NaN	0	29.2336	29.2336	NaN	NaN	1	NaN	NaN	NaN	NaN	0	NaN	NaN
P20700	Lamin-B1	LMNB1	29.8864	29.7261	0.449515	0.0150408	3	29.7235	29.6623	0.152458	0.00512919	3	29.6871	29.6262	0.142509	0.00480036	3	29.2467	28.2049	2.15376	0.073641	3	29.4718	29.4722	0.182667	0.00619803	3	29.6159	29.4809	0.776402	0.0262157	3	28.4902	29.2229	1.55448	0.054562	3	29.4139	29.511	0.282098	0.00959063	3	29.2235	29.4289	0.377571	0.0129201	3	29.539	29.6623
P20742	Pregnancy zone protein	PZP	35.452	35.605	0.96479	0.027214	3	36.6608	36.5202	0.447769	0.0122138	3	35.9156	35.8855	0.556444	0.0154931	3	35.3008	35.2857	0.317432	0.00899221	3	35.204	35.0285	0.89351	0.0253809	3	35.6724	35.5566	0.28106	0.00787892	3	35.7093	35.702	0.0549829	0.00153974	3	35.1979	35.4047	0.930419	0.026434	3	34.7569	35.2927	1.06961	0.0307739	3	36.3311	37.162
P20839	Inosine-5-monophosphate dehydrogenase 1	IMPDH1	NaN	NaN	NaN	NaN	0	26.0577	26.0577	NaN	NaN	1	NaN	NaN	NaN	NaN	0	27.3481	27.3481	NaN	NaN	1	27.1217	27.1217	1.15631	0.0426343	2	27.7031	27.7031	1.11807	0.040359	2	28.1015	28.0555	0.721859	0.0256875	3	26.9843	26.9843	0.888288	0.0329187	2	NaN	NaN	NaN	NaN	0	NaN	NaN
P20851	C4b-binding protein beta chain	C4BPB	30.4022	29.8435	1.6844	0.0554038	3	30.8553	30.7313	0.709721	0.0230016	3	30.6003	30.7649	0.343972	0.0112408	3	32.2354	32.1845	0.847864	0.0263023	3	31.1509	31.4858	0.643614	0.0206611	3	31.4811	31.1269	0.817413	0.0259652	3	32.49	32.0727	0.788044	0.024255	3	31.5407	31.5379	0.00835735	0.000264971	3	31.4706	31.5049	1.71727	0.0545675	3	32.295	30.7313
P20962	Parathymosin	PTMS	29.918	29.918	0.145917	0.00487724	2	29.0345	29.0345	NaN	NaN	1	NaN	NaN	NaN	NaN	0	29.4711	29.4711	0.902234	0.0306142	2	29.7303	29.1511	1.03092	0.0346758	3	30.1839	30.1839	0.315809	0.0104628	2	30.0216	30.1535	0.259069	0.00862943	3	30.4382	30.3661	0.182029	0.00598027	3	30.4088	30.3674	0.087306	0.00287108	3	29.8148	NaN
P21127	Cyclin-dependent kinase 11B	CDK11B	NaN	NaN	NaN	NaN	0	NaN	NaN	NaN	NaN	0	NaN	NaN	NaN	NaN	0	NaN	NaN	NaN	NaN	0	NaN	NaN	NaN	NaN	0	25.5266	25.5266	NaN	NaN	1	NaN	NaN	NaN	NaN	0	NaN	NaN	NaN	NaN	0	NaN	NaN	NaN	NaN	0	NaN	NaN
P21266	Glutathione S-transferase Mu 3	GSTM3	25.8938	25.8938	NaN	NaN	1	NaN	NaN	NaN	NaN	0	25.9657	25.9657	0.206101	0.00793746	2	NaN	NaN	NaN	NaN	0	NaN	NaN	NaN	NaN	0	26.4357	26.4357	NaN	NaN	1	NaN	NaN	NaN	NaN	0	NaN	NaN	NaN	NaN	0	25.6064	25.6064	NaN	NaN	1	25.8938	NaN
P21281	V-type proton ATPase subunit B, brain isoform	ATP6V1B2	26.4309	26.4309	NaN	NaN	1	26.1729	26.1729	NaN	NaN	1	26.3627	26.3627	NaN	NaN	1	NaN	NaN	NaN	NaN	0	NaN	NaN	NaN	NaN	0	25.3986	25.3986	NaN	NaN	1	NaN	NaN	NaN	NaN	0	26.1649	26.1649	NaN	NaN	1	NaN	NaN	NaN	NaN	0	NaN	NaN
P21283	V-type proton ATPase subunit C 1	ATP6V1C1	26.0341	26.0341	0.30038	0.0115379	2	27.8855	27.8855	NaN	NaN	1	25.7106	25.7011	0.337442	0.0131246	3	26.4151	26.4151	0.381355	0.014437	2	26.6713	26.6713	0.149377	0.00560064	2	27.5667	27.5667	NaN	NaN	1	NaN	NaN	NaN	NaN	0	NaN	NaN	NaN	NaN	0	NaN	NaN	NaN	NaN	0	26.2465	NaN
P21291	Cysteine and glycine-rich protein 1	CSRP1	NaN	NaN	NaN	NaN	0	NaN	NaN	NaN	NaN	0	NaN	NaN	NaN	NaN	0	NaN	NaN	NaN	NaN	0	25.5482	25.5482	4.15859	0.162774	2	NaN	NaN	NaN	NaN	0	NaN	NaN	NaN	NaN	0	NaN	NaN	NaN	NaN	0	NaN	NaN	NaN	NaN	0	NaN	NaN
P21333	Filamin-A	FLNA	29.0556	29.0518	0.0573401	0.00197346	3	28.9071	28.9512	0.0952777	0.003296	3	29.054	28.9869	0.221775	0.00763321	3	29.3184	28.6997	1.25512	0.0428102	3	28.9566	29.095	0.329956	0.0113949	3	28.5563	28.5117	0.254626	0.00891661	3	28.9726	28.6038	0.967842	0.0334054	3	28.8273	28.7506	0.202429	0.00702215	3	29.4241	29.6938	0.667806	0.0226959	3	29.1147	28.9512
P21399	Cytoplasmic aconitate hydratase	ACO1	27.2092	27.2411	0.180655	0.00663948	3	26.9071	26.7854	0.295364	0.0109772	3	26.8003	26.8804	0.187068	0.00698008	3	27.0753	27.0753	NaN	NaN	1	26.716	27.2096	1.3695	0.0512616	3	27.379	27.379	0.00397462	0.00014517	2	NaN	NaN	NaN	NaN	0	NaN	NaN	NaN	NaN	0	NaN	NaN	NaN	NaN	0	27.0148	26.7854
P21579	Synaptotagmin-1	SYT1	NaN	NaN	NaN	NaN	0	NaN	NaN	NaN	NaN	0	NaN	NaN	NaN	NaN	0	27.2163	27.2163	NaN	NaN	1	NaN	NaN	NaN	NaN	0	NaN	NaN	NaN	NaN	0	NaN	NaN	NaN	NaN	0	NaN	NaN	NaN	NaN	0	NaN	NaN	NaN	NaN	0	NaN	NaN
P21589	5-nucleotidase	NT5E	NaN	NaN	NaN	NaN	0	NaN	NaN	NaN	NaN	0	27.2867	27.2867	NaN	NaN	1	NaN	NaN	NaN	NaN	0	NaN	NaN	NaN	NaN	0	NaN	NaN	NaN	NaN	0	NaN	NaN	NaN	NaN	0	NaN	NaN	NaN	NaN	0	NaN	NaN	NaN	NaN	0	NaN	NaN
P21796	Voltage-dependent anion-selective channel protein 1	VDAC1	29.7531	29.8813	0.407702	0.0137028	3	29.6732	29.7047	0.12808	0.00431633	3	29.471	29.5993	0.240507	0.00816078	3	29.9888	29.9779	0.217886	0.00726557	3	29.8728	29.8335	0.117243	0.00392474	3	29.8735	29.8592	0.24206	0.00810284	3	29.8793	29.8407	0.128533	0.00430173	3	29.8782	29.8709	0.216174	0.00723518	3	29.8309	29.824	0.335851	0.0112585	3	29.2967	29.7826
P21912	Succinate dehydrogenase [ubiquinone] iron-sulfur subunit, mitochondrial	SDHB	26.4578	26.4578	0.33621	0.0127074	2	26.1496	26.1496	NaN	NaN	1	25.6111	25.6085	0.11329	0.00442348	3	NaN	NaN	NaN	NaN	0	26.1332	26.1332	NaN	NaN	1	25.7227	25.7227	1.2147	0.0472229	2	NaN	NaN	NaN	NaN	0	NaN	NaN	NaN	NaN	0	27.1855	27.1855	NaN	NaN	1	NaN	26.1496
P21926	CD9 antigen	CD9	NaN	NaN	NaN	NaN	0	28.287	28.287	NaN	NaN	1	NaN	NaN	NaN	NaN	0	NaN	NaN	NaN	NaN	0	NaN	NaN	NaN	NaN	0	NaN	NaN	NaN	NaN	0	NaN	NaN	NaN	NaN	0	NaN	NaN	NaN	NaN	0	NaN	NaN	NaN	NaN	0	NaN	NaN
P22033	Methylmalonyl-CoA mutase, mitochondrial	MUT	25.1442	25.1442	NaN	NaN	1	NaN	NaN	NaN	NaN	0	NaN	NaN	NaN	NaN	0	NaN	NaN	NaN	NaN	0	NaN	NaN	NaN	NaN	0	NaN	NaN	NaN	NaN	0	NaN	NaN	NaN	NaN	0	NaN	NaN	NaN	NaN	0	NaN	NaN	NaN	NaN	0	NaN	NaN
P22059	Oxysterol-binding protein 1	OSBP	25.9555	25.9555	NaN	NaN	1	26.4112	26.4112	0.494153	0.0187099	2	25.9384	25.9384	0.662744	0.0255507	2	26.4593	26.4593	NaN	NaN	1	NaN	NaN	NaN	NaN	0	25.9272	25.9272	NaN	NaN	1	NaN	NaN	NaN	NaN	0	NaN	NaN	NaN	NaN	0	NaN	NaN	NaN	NaN	0	25.9555	26.7607
P22061	Protein-L-isoaspartate(D-aspartate) O-methyltransferase	PCMT1	28.8805	28.8805	NaN	NaN	1	NaN	NaN	NaN	NaN	0	28.8861	28.8861	NaN	NaN	1	NaN	NaN	NaN	NaN	0	NaN	NaN	NaN	NaN	0	NaN	NaN	NaN	NaN	0	NaN	NaN	NaN	NaN	0	NaN	NaN	NaN	NaN	0	NaN	NaN	NaN	NaN	0	NaN	NaN
P22087	rRNA 2-O-methyltransferase fibrillarin	FBL	29.4577	29.2941	0.347957	0.0118121	3	28.7135	28.6029	0.292339	0.0101813	3	29.2824	29.4005	0.31878	0.0108864	3	28.5868	28.5868	0.354305	0.012394	2	29.2114	29.2114	0.107204	0.00366994	2	29.1548	29.1548	NaN	NaN	1	28.0863	28.0863	NaN	NaN	1	28.2119	28.2119	NaN	NaN	1	28.2908	28.2908	NaN	NaN	1	29.8573	28.6029
P22102	Trifunctional purine biosynthetic protein adenosine-3;Phosphoribosylamine--glycine ligase;Phosphoribosylformylglycinamidine cyclo-ligase;Phosphoribosylglycinamide formyltransferase	GART	27.7485	27.7485	0.791057	0.0285081	2	28.2994	28.2999	0.597652	0.0211189	3	28.238	28.3439	0.277423	0.00982443	3	27.8779	27.9454	0.198335	0.00711442	3	28.16	28.3876	0.773543	0.0274696	3	27.5948	27.5948	NaN	NaN	1	27.5083	27.5083	0.373712	0.0135854	2	27.8639	27.9072	0.397615	0.0142699	3	27.902	27.902	NaN	NaN	1	28.3079	27.7015
P22234	Multifunctional protein ADE2;Phosphoribosylaminoimidazole-succinocarboxamide synthase;Phosphoribosylaminoimidazole carboxylase	PAICS	29.5516	29.5809	0.0550651	0.00186335	3	29.717	29.8132	0.271304	0.00912958	3	29.6406	29.6053	0.173746	0.00586176	3	29.5415	29.7624	0.441459	0.0149437	3	29.831	29.7965	0.188872	0.00633141	3	29.5906	29.725	0.405483	0.0137031	3	29.2984	29.2812	0.206824	0.00705925	3	29.0233	29.0796	0.397639	0.0137007	3	29.2363	29.1628	0.143826	0.00491946	3	29.4881	29.4108
P22307	Non-specific lipid-transfer protein	SCP2	28.7139	28.5732	0.358423	0.0124825	3	28.6351	28.4767	0.48931	0.0170878	3	28.4307	28.2649	0.384497	0.013524	3	28.0176	27.7749	0.689	0.0245917	3	28.3473	28.2772	0.609571	0.0215037	3	28.6705	28.7058	0.423073	0.0147564	3	28.4072	28.4684	0.541829	0.0190736	3	28.383	28.3734	0.147855	0.00520928	3	28.5706	28.5161	0.272386	0.00953379	3	29.1214	28.4767
P22314	Ubiquitin-like modifier-activating enzyme 1	UBA1	29.7669	29.7275	0.124048	0.00416732	3	30.0189	29.8944	0.220858	0.00735732	3	29.9542	29.8888	0.121335	0.00405069	3	29.5558	30.1283	1.03999	0.0351873	3	29.9273	29.8956	0.078698	0.00262964	3	29.7609	29.9452	0.582246	0.0195641	3	29.9123	29.8601	0.103716	0.00346735	3	29.97	30.0279	0.129814	0.00433145	3	30.0556	30.0633	0.0269537	0.000896793	3	29.9058	29.8883
P22352	Glutathione peroxidase 3	GPX3	29.8194	30.1853	0.693732	0.0232645	3	30.7698	30.9532	0.514577	0.0167234	3	29.8178	29.8178	0.89069	0.029871	2	30.6864	31.286	1.16259	0.0378861	3	31.2686	31.2686	NaN	NaN	1	30.2461	30.3711	0.853326	0.0282128	3	30.3204	29.8471	0.906718	0.0299046	3	29.9799	30.0052	0.3986	0.0132956	3	30.3283	31.1537	1.86426	0.0614693	3	30.1853	30.9532
P22392	Nucleoside diphosphate kinase B;Putative nucleoside diphosphate kinase	NME2	30.7385	30.6465	0.190836	0.00620839	3	30.6855	30.697	0.212234	0.00691644	3	30.9836	31.1279	0.260842	0.00841871	3	30.4676	30.4972	0.152533	0.00500639	3	30.7769	30.8909	0.543988	0.0176752	3	30.7904	30.6146	0.48025	0.0155974	3	31.6173	31.5384	0.282487	0.00893456	3	31.4214	31.3754	0.113764	0.00362059	3	30.7095	31.2923	1.10968	0.0361348	3	30.9579	30.8917
P22415	Upstream stimulatory factor 1;Upstream stimulatory factor 2	USF1	24.9713	24.9713	NaN	NaN	1	NaN	NaN	NaN	NaN	0	25.1042	25.1042	NaN	NaN	1	NaN	NaN	NaN	NaN	0	NaN	NaN	NaN	NaN	0	NaN	NaN	NaN	NaN	0	NaN	NaN	NaN	NaN	0	NaN	NaN	NaN	NaN	0	NaN	NaN	NaN	NaN	0	NaN	NaN
P22570	NADPH:adrenodoxin oxidoreductase, mitochondrial	FDXR	27.5278	27.5278	NaN	NaN	1	27.553	27.553	0.230046	0.00834922	2	NaN	NaN	NaN	NaN	0	NaN	NaN	NaN	NaN	0	27.8949	27.8949	NaN	NaN	1	NaN	NaN	NaN	NaN	0	NaN	NaN	NaN	NaN	0	NaN	NaN	NaN	NaN	0	NaN	NaN	NaN	NaN	0	27.5278	27.3903
P22626	Heterogeneous nuclear ribonucleoproteins A2/B1	HNRNPA2B1	28.3961	28.5504	0.371272	0.0130748	3	28.8756	28.878	0.0158343	0.000548361	3	28.8217	28.7556	0.160756	0.00557759	3	29.2527	29.2707	0.803436	0.0274653	3	28.9913	28.8322	0.640166	0.0220813	3	28.8038	28.9903	1.02553	0.035604	3	28.1283	28.0035	0.692785	0.0246295	3	28.5085	28.9181	0.979192	0.0343474	3	29.0684	29.0902	0.54326	0.018689	3	28.5504	28.8588
P22676	Calretinin	CALB2	25.1154	25.1154	NaN	NaN	1	24.703	24.703	NaN	NaN	1	NaN	NaN	NaN	NaN	0	NaN	NaN	NaN	NaN	0	25.028	25.028	NaN	NaN	1	NaN	NaN	NaN	NaN	0	NaN	NaN	NaN	NaN	0	NaN	NaN	NaN	NaN	0	NaN	NaN	NaN	NaN	0	NaN	NaN
P22694	cAMP-dependent protein kinase catalytic subunit beta	PRKACB	25.9117	25.9117	0.266284	0.0102766	2	26.4009	26.4009	NaN	NaN	1	26.0738	26.0738	NaN	NaN	1	NaN	NaN	NaN	NaN	0	NaN	NaN	NaN	NaN	0	NaN	NaN	NaN	NaN	0	29.3474	29.3474	NaN	NaN	1	NaN	NaN	NaN	NaN	0	NaN	NaN	NaN	NaN	0	25.7234	26.4009
P22695	Cytochrome b-c1 complex subunit 2, mitochondrial	UQCRC2	29.3572	29.3284	0.406211	0.0138368	3	29.6072	29.613	0.154317	0.00521214	3	29.402	29.4973	0.233727	0.00794935	3	28.6665	28.7333	1.17223	0.040892	3	28.3471	28.1171	0.400465	0.0141272	3	28.8955	28.7297	0.289621	0.0100231	3	29.0075	28.8779	0.637188	0.0219663	3	29.0155	29.1379	0.687618	0.0236983	3	29.2083	29.2083	0.298219	0.0102101	2	29.3284	29.7585
P22792	Carboxypeptidase N subunit 2	CPN2	31.4324	31.2749	1.0976	0.0349195	3	32.0133	32.0851	0.324031	0.0101218	3	31.308	31.8034	1.24485	0.0397616	3	33.1706	33.1614	1.41232	0.0425775	3	31.2398	30.9301	1.4964	0.0479003	3	32.4937	32.2567	0.535214	0.0164713	3	32.2601	31.6231	1.33615	0.041418	3	31.6593	31.6427	0.0510319	0.00161191	3	31.9809	32.3004	1.3119	0.0410214	3	32.6002	32.2954
P22891	Vitamin K-dependent protein Z	PROZ	NaN	NaN	NaN	NaN	0	26.2163	26.2163	NaN	NaN	1	NaN	NaN	NaN	NaN	0	27.2291	27.2291	0.446641	0.016403	2	26.4691	26.4691	NaN	NaN	1	NaN	NaN	NaN	NaN	0	NaN	NaN	NaN	NaN	0	NaN	NaN	NaN	NaN	0	NaN	NaN	NaN	NaN	0	NaN	NaN
P23142	Fibulin-1	FBLN1	32.9461	33.0171	0.228055	0.00692206	3	32.8246	32.9916	0.356792	0.0108696	3	32.4992	32.493	0.319081	0.00981813	3	33.982	33.912	0.293015	0.00862265	3	31.2843	32.386	2.35679	0.0753347	3	32.7771	32.881	0.268706	0.00819797	3	33.4997	33.2813	0.831027	0.024807	3	32.7358	32.5585	0.563675	0.0172189	3	31.9544	32.8298	2.11252	0.0661103	3	33.1302	33.0674
P23193	Transcription elongation factor A protein 1	TCEA1	27.1999	27.1999	NaN	NaN	1	26.8826	26.8826	0.102199	0.00380169	2	27.5483	27.5483	NaN	NaN	1	NaN	NaN	NaN	NaN	0	NaN	NaN	NaN	NaN	0	26.8891	27.1786	0.860807	0.0320133	3	27.7283	27.7283	NaN	NaN	1	27.7512	27.7512	NaN	NaN	1	28.2796	28.0973	0.383072	0.0135459	3	NaN	26.8103
P23229	Integrin alpha-6;Integrin alpha-6 heavy chain;Integrin alpha-6 light chain;Processed integrin alpha-6	ITGA6	NaN	NaN	NaN	NaN	0	NaN	NaN	NaN	NaN	0	25.6434	25.6434	NaN	NaN	1	NaN	NaN	NaN	NaN	0	NaN	NaN	NaN	NaN	0	NaN	NaN	NaN	NaN	0	NaN	NaN	NaN	NaN	0	NaN	NaN	NaN	NaN	0	NaN	NaN	NaN	NaN	0	NaN	NaN
P23246	Splicing factor, proline- and glutamine-rich	SFPQ	30.8359	30.7127	0.288725	0.00936325	3	30.6776	30.5819	0.223492	0.0072852	3	30.2809	30.0192	0.567828	0.018752	3	30.0867	30.3075	0.623153	0.0207119	3	29.9052	30.1261	0.517768	0.0173136	3	30.7894	30.5981	0.593105	0.0192632	3	30.1755	30.1755	0.0312939	0.00103706	2	29.8735	29.979	0.624924	0.020919	3	30.1995	30.1358	0.867115	0.0287129	3	31.1658	30.5819
P23258	Tubulin gamma-1 chain;Tubulin gamma-2 chain	TUBG1	NaN	NaN	NaN	NaN	0	NaN	NaN	NaN	NaN	0	NaN	NaN	NaN	NaN	0	25.5112	25.5112	NaN	NaN	1	26.0057	26.0057	NaN	NaN	1	NaN	NaN	NaN	NaN	0	NaN	NaN	NaN	NaN	0	NaN	NaN	NaN	NaN	0	NaN	NaN	NaN	NaN	0	NaN	NaN
P23284	Peptidyl-prolyl cis-trans isomerase B	PPIB	29.428	29.4724	0.225112	0.00764957	3	29.1339	29.1372	0.107274	0.0036821	3	29.4667	29.5179	0.299099	0.0101504	3	29.3475	29.2643	0.461041	0.0157097	3	29.5047	29.438	0.183654	0.00622457	3	29.4219	29.536	0.206551	0.00702032	3	28.807	28.7673	0.128426	0.00445813	3	28.7889	29.0507	0.675468	0.0234628	3	29.0444	29.1887	0.302417	0.0104122	3	29.6276	29.1372
P23368	NAD-dependent malic enzyme, mitochondrial	ME2	NaN	NaN	NaN	NaN	0	28.48	28.48	NaN	NaN	1	NaN	NaN	NaN	NaN	0	NaN	NaN	NaN	NaN	0	NaN	NaN	NaN	NaN	0	28.1402	28.1402	NaN	NaN	1	NaN	NaN	NaN	NaN	0	NaN	NaN	NaN	NaN	0	NaN	NaN	NaN	NaN	0	NaN	28.48
P23381	Tryptophan--tRNA ligase, cytoplasmic;T1-TrpRS;T2-TrpRS	WARS	28.1031	27.9822	0.238499	0.00848658	3	27.961	28.0679	0.582361	0.0208276	3	27.9624	27.9624	0.426738	0.0152611	2	27.9219	27.9219	0.440081	0.0157611	2	27.405	27.405	NaN	NaN	1	27.0681	27.0681	NaN	NaN	1	NaN	NaN	NaN	NaN	0	27.2625	27.2625	NaN	NaN	1	27.5995	27.5995	NaN	NaN	1	27.9492	27.3325
P23396	40S ribosomal protein S3	RPS3	29.6627	29.6413	0.291022	0.00981104	3	29.2996	29.3035	0.0980933	0.00334794	3	29.8107	29.7875	0.201221	0.00674998	3	29.9336	29.9289	0.079798	0.00266584	3	29.8354	29.969	0.579836	0.0194345	3	29.657	29.4895	0.420496	0.0141786	3	28.1205	28.1205	0.0253798	0.000902538	2	29.7968	29.7869	0.125319	0.00420578	3	29.1489	29.1489	1.06072	0.0363899	2	29.6413	29.3957
P23434	Glycine cleavage system H protein, mitochondrial	GCSH	NaN	NaN	NaN	NaN	0	NaN	NaN	NaN	NaN	0	26.8825	26.8825	NaN	NaN	1	NaN	NaN	NaN	NaN	0	NaN	NaN	NaN	NaN	0	NaN	NaN	NaN	NaN	0	NaN	NaN	NaN	NaN	0	NaN	NaN	NaN	NaN	0	NaN	NaN	NaN	NaN	0	NaN	NaN
P23497	Nuclear autoantigen Sp-100	SP100	NaN	NaN	NaN	NaN	0	NaN	NaN	NaN	NaN	0	NaN	NaN	NaN	NaN	0	28.3239	28.3239	NaN	NaN	1	29.2831	29.2831	NaN	NaN	1	NaN	NaN	NaN	NaN	0	NaN	NaN	NaN	NaN	0	20.3036	20.3036	NaN	NaN	1	NaN	NaN	NaN	NaN	0	NaN	NaN
P23526	Adenosylhomocysteinase	AHCY	30.3407	30.3475	0.0686096	0.0022613	3	30.5239	30.4995	0.0647577	0.00212154	3	30.233	30.1247	0.294942	0.00975563	3	30.314	30.3799	0.149891	0.00494461	3	30.5122	30.4934	0.0901955	0.00295605	3	30.4697	30.2495	0.413985	0.0135868	3	30.4742	30.3696	0.418236	0.0137243	3	30.6784	30.5485	0.393548	0.0128282	3	30.1284	30.2634	0.459829	0.0152623	3	30.269	30.5973
P23528	Cofilin-1	CFL1	32.0534	32.0683	0.0810803	0.00252954	3	31.9751	32.1216	0.355407	0.0111151	3	32.1493	32.1487	0.0652982	0.00203109	3	32.1085	32.1372	0.284536	0.00886171	3	31.9518	31.8864	0.17532	0.00548701	3	31.7264	31.7281	0.431279	0.0135937	3	32.4254	32.2017	0.558037	0.0172099	3	31.8626	31.9039	0.209452	0.00657361	3	32.2861	32.335	0.119379	0.00369753	3	32.0683	32.2338
P23588	Eukaryotic translation initiation factor 4B	EIF4B	NaN	NaN	NaN	NaN	0	28.8605	28.8605	NaN	NaN	1	NaN	NaN	NaN	NaN	0	NaN	NaN	NaN	NaN	0	NaN	NaN	NaN	NaN	0	NaN	NaN	NaN	NaN	0	NaN	NaN	NaN	NaN	0	NaN	NaN	NaN	NaN	0	NaN	NaN	NaN	NaN	0	NaN	NaN
P23634	Plasma membrane calcium-transporting ATPase 4	ATP2B4	25.9252	25.9252	NaN	NaN	1	NaN	NaN	NaN	NaN	0	NaN	NaN	NaN	NaN	0	NaN	NaN	NaN	NaN	0	NaN	NaN	NaN	NaN	0	NaN	NaN	NaN	NaN	0	NaN	NaN	NaN	NaN	0	NaN	NaN	NaN	NaN	0	NaN	NaN	NaN	NaN	0	NaN	NaN
P23919	Thymidylate kinase	DTYMK	NaN	NaN	NaN	NaN	0	26.5763	26.5763	NaN	NaN	1	27.3578	27.3578	NaN	NaN	1	27.8161	27.8161	0.512498	0.0184245	2	27.4848	27.4848	0.515784	0.0187662	2	27.662	27.662	0.86974	0.0314417	2	28.6188	28.6188	NaN	NaN	1	27.684	27.684	NaN	NaN	1	NaN	NaN	NaN	NaN	0	NaN	26.5763
P23921	Ribonucleoside-diphosphate reductase large subunit	RRM1	26.7773	26.7773	0.321077	0.0119906	2	27.1737	27.1737	0.156112	0.00574496	2	27.0684	27.1346	0.123153	0.00454969	3	NaN	NaN	NaN	NaN	0	NaN	NaN	NaN	NaN	0	27.5926	27.5952	0.241837	0.00876456	3	27.4103	27.4103	NaN	NaN	1	26.8219	26.8219	NaN	NaN	1	28.9244	28.9244	NaN	NaN	1	26.5502	27.0633
P24534	Elongation factor 1-beta	EEF1B2	31.5939	31.6021	0.0202587	0.000641224	3	31.6519	31.5079	0.352304	0.0111306	3	31.4614	31.4064	0.162981	0.00518036	3	31.5684	31.4683	0.417975	0.0132403	3	31.1719	31.2363	0.165184	0.00529912	3	30.9842	30.9714	0.115999	0.00374381	3	31.1714	31.3905	0.394598	0.012659	3	30.9278	30.8478	0.355231	0.0114858	3	31.3081	31.3436	0.316448	0.0101076	3	31.5708	31.3944
P24539	ATP synthase F(0) complex subunit B1, mitochondrial	ATP5F1	26.2899	26.2899	NaN	NaN	1	26.015	26.015	0.0509781	0.00195957	2	26.7757	26.7757	0.263076	0.00982519	2	26.2045	26.2045	0.162603	0.00620515	2	25.9055	26.0385	0.94797	0.0365934	3	24.8105	24.8105	NaN	NaN	1	26.7459	26.8519	0.195483	0.00730891	3	26.7721	26.9353	0.365166	0.0136398	3	26.3068	26.2554	0.691659	0.026292	3	26.2899	NaN
P24666	Low molecular weight phosphotyrosine protein phosphatase	ACP1	NaN	NaN	NaN	NaN	0	NaN	NaN	NaN	NaN	0	26.4862	26.4862	0.18453	0.00696704	2	NaN	NaN	NaN	NaN	0	26.9277	26.9277	NaN	NaN	1	NaN	NaN	NaN	NaN	0	NaN	NaN	NaN	NaN	0	NaN	NaN	NaN	NaN	0	NaN	NaN	NaN	NaN	0	NaN	NaN
P24752	Acetyl-CoA acetyltransferase, mitochondrial	ACAT1	28.9185	28.9185	0.357073	0.0123476	2	28.6446	28.4113	0.526819	0.0183915	3	29.8604	29.597	0.615891	0.0206257	3	29.1088	29.1088	0.573405	0.0196987	2	29.5022	29.5022	1.1316	0.0383566	2	28.7685	28.7742	0.114838	0.0039918	3	29.4106	29.4386	0.22293	0.00757992	3	29.5494	29.4938	0.152056	0.00514582	3	28.9499	29.1736	0.591638	0.0204366	3	NaN	28.4113
P24821	Tenascin	TNC	NaN	NaN	NaN	NaN	0	NaN	NaN	NaN	NaN	0	26.6574	26.6574	NaN	NaN	1	NaN	NaN	NaN	NaN	0	29.2775	29.2775	1.59993	0.0546471	2	28.819	28.8215	0.426472	0.0147983	3	25.2737	25.2737	NaN	NaN	1	27.6056	27.6056	0.119218	0.00431863	2	28.3841	28.3841	NaN	NaN	1	NaN	NaN
P24863	Cyclin-C	CCNC	30.2247	30.2247	NaN	NaN	1	NaN	NaN	NaN	NaN	0	NaN	NaN	NaN	NaN	0	NaN	NaN	NaN	NaN	0	NaN	NaN	NaN	NaN	0	NaN	NaN	NaN	NaN	0	NaN	NaN	NaN	NaN	0	30.4381	30.4381	NaN	NaN	1	NaN	NaN	NaN	NaN	0	NaN	NaN
P24928	DNA-directed RNA polymerase II subunit RPB1	POLR2A	NaN	NaN	NaN	NaN	0	NaN	NaN	NaN	NaN	0	27.7928	27.7928	NaN	NaN	1	NaN	NaN	NaN	NaN	0	25.9414	25.9414	0.930089	0.0358535	2	NaN	NaN	NaN	NaN	0	NaN	NaN	NaN	NaN	0	NaN	NaN	NaN	NaN	0	NaN	NaN	NaN	NaN	0	NaN	NaN
P24941	Cyclin-dependent kinase 2	CDK2	NaN	NaN	NaN	NaN	0	NaN	NaN	NaN	NaN	0	NaN	NaN	NaN	NaN	0	29.515	29.515	0.0641064	0.00217199	2	28.822	28.822	0.0664369	0.00230508	2	28.8409	28.8409	NaN	NaN	1	29.2305	29.2305	NaN	NaN	1	NaN	NaN	NaN	NaN	0	29.3566	29.3566	NaN	NaN	1	NaN	NaN
P25205	DNA replication licensing factor MCM3	MCM3	27.3395	27.3911	0.177275	0.00648422	3	27.5792	27.6551	0.133372	0.00483597	3	27.6611	27.6664	0.201054	0.00726849	3	27.2551	27.2501	0.657026	0.0241066	3	27.0761	26.9148	0.406635	0.0150182	3	26.9052	26.687	0.801956	0.0298068	3	26.8021	26.8021	NaN	NaN	1	27.2823	27.2823	NaN	NaN	1	28.3522	28.3522	NaN	NaN	1	27.1422	27.6551
P25311	Zinc-alpha-2-glycoprotein	AZGP1	28.9034	28.9034	0.930593	0.0321967	2	27.9943	27.9943	NaN	NaN	1	NaN	NaN	NaN	NaN	0	29.9658	29.8649	0.252347	0.00842119	3	30.2636	30.2636	NaN	NaN	1	27.6974	27.5141	1.51254	0.0546093	3	29.5974	28.9528	1.90514	0.0643683	3	28.2853	28.2853	0.623141	0.0220305	2	29.9629	29.9629	0.770829	0.0257261	2	28.2454	NaN
P25325	3-mercaptopyruvate sulfurtransferase	MPST	24.7472	24.7472	NaN	NaN	1	NaN	NaN	NaN	NaN	0	NaN	NaN	NaN	NaN	0	NaN	NaN	NaN	NaN	0	NaN	NaN	NaN	NaN	0	NaN	NaN	NaN	NaN	0	NaN	NaN	NaN	NaN	0	NaN	NaN	NaN	NaN	0	NaN	NaN	NaN	NaN	0	NaN	NaN
P25398	40S ribosomal protein S12	RPS12	30.0294	30.1375	0.378806	0.0126145	3	29.9245	29.8711	0.333553	0.0111465	3	30.1215	30.2341	0.297148	0.00986499	3	29.7546	29.9446	0.457509	0.0153761	3	29.8771	29.7824	0.472364	0.0158102	3	30.1193	30.2062	0.548109	0.0181979	3	29.3337	29.272	0.122079	0.00416172	3	29.3455	29.3135	0.117026	0.00398788	3	29.4388	29.4281	0.0960164	0.00326156	3	29.6083	29.8711
P25685	DnaJ homolog subfamily B member 1	DNAJB1	NaN	NaN	NaN	NaN	0	NaN	NaN	NaN	NaN	0	26.1656	26.1656	NaN	NaN	1	NaN	NaN	NaN	NaN	0	NaN	NaN	NaN	NaN	0	27.712	27.712	NaN	NaN	1	NaN	NaN	NaN	NaN	0	NaN	NaN	NaN	NaN	0	NaN	NaN	NaN	NaN	0	NaN	NaN
P25705	ATP synthase subunit alpha, mitochondrial	ATP5A1	29.8875	30.4002	1.06017	0.0354721	3	29.7288	29.8491	0.706143	0.0237528	3	29.846	29.8653	0.0901194	0.00301948	3	29.8252	29.5377	0.53268	0.0178601	3	29.8302	29.5667	0.696766	0.0233577	3	28.8855	29.8622	2.0204	0.0699449	3	27.9921	27.8313	0.482061	0.0172213	3	28.9363	28.9363	0.122335	0.00422773	2	28.6176	28.6176	0.579551	0.0202515	2	30.4002	30.3671
P25786	Proteasome subunit alpha type-1	PSMA1	28.3572	28.5511	0.618487	0.0218105	3	29.6907	29.8112	0.570295	0.0192078	3	28.5721	28.697	0.244631	0.0085619	3	28.3612	28.3612	0.0756067	0.00266585	2	28.5914	28.2905	0.750522	0.0262499	3	28.5631	28.9356	0.930176	0.0325656	3	28.6221	28.8112	0.52376	0.0182992	3	29.3933	29.5141	0.381513	0.0129796	3	28.8694	28.8263	0.119022	0.00412277	3	28.8556	29.0698
P25787	Proteasome subunit alpha type-2	PSMA2	27.5519	27.5519	0.111706	0.00405438	3	28.7382	28.9295	0.458804	0.0159649	3	27.9576	28.0108	0.165607	0.0059235	3	27.8578	27.8578	NaN	NaN	1	28.0485	28.1754	0.5253	0.0187283	3	27.4276	27.3507	0.14946	0.00544928	3	27.9307	27.9307	0.247012	0.00884374	2	28.2708	28.0222	0.650506	0.0230098	3	27.421	27.421	NaN	NaN	1	27.6636	28.2147
P25788	Proteasome subunit alpha type-3	PSMA3	30.0058	29.8908	0.543903	0.0181266	3	31.2374	31.3808	0.342957	0.0109791	3	30.0552	29.922	0.364319	0.0121217	3	30.5734	30.6415	0.142414	0.00465811	3	29.9227	29.7963	0.412225	0.0137763	3	29.3291	29.4778	0.314712	0.0107304	3	30.4676	30.8302	1.08054	0.0354653	3	31.0109	31.2185	0.570808	0.0184067	3	30.5847	30.5324	0.54496	0.0178181	3	30.598	30.846
P25789	Proteasome subunit alpha type-4	PSMA4	29.6197	29.6511	0.351763	0.011876	3	30.8432	31.0115	0.396532	0.0128564	3	29.8526	29.9442	0.271616	0.00909858	3	30.2236	30.4081	0.325897	0.0107829	3	30.0343	30.3498	0.581862	0.0193732	3	30.2613	30.1978	0.575171	0.0190069	3	29.8409	29.8409	0.543559	0.0182152	2	30.7827	30.7229	0.300569	0.00976422	3	29.6468	29.3365	0.680061	0.0229388	3	29.9548	30.3903
P26006	Integrin alpha-3;Integrin alpha-3 heavy chain;Integrin alpha-3 light chain	ITGA3	NaN	NaN	NaN	NaN	0	NaN	NaN	NaN	NaN	0	NaN	NaN	NaN	NaN	0	NaN	NaN	NaN	NaN	0	NaN	NaN	NaN	NaN	0	NaN	NaN	NaN	NaN	0	NaN	NaN	NaN	NaN	0	NaN	NaN	NaN	NaN	0	28.9022	28.9022	NaN	NaN	1	NaN	NaN
P26038	Moesin	MSN	30.3133	30.4217	0.262025	0.00864388	3	30.1801	30.1982	0.102441	0.00339432	3	30.1042	30.1183	0.056092	0.00186326	3	30.3024	30.1725	0.249909	0.00824718	3	30.3641	30.3544	0.423462	0.0139461	3	30.4214	30.531	0.311764	0.0102482	3	30.1717	30.2111	0.153987	0.00510369	3	30.5493	30.5236	0.283219	0.00927087	3	30.3811	30.2105	0.384742	0.0126639	3	30.5038	30.2723
P26196	Probable ATP-dependent RNA helicase DDX6	DDX6	24.3072	24.3072	NaN	NaN	1	24.5353	24.5353	NaN	NaN	1	25.3763	25.3582	0.283485	0.0111712	3	25.2404	25.2404	0.268914	0.0106541	2	24.2578	24.12	0.767553	0.0316415	3	25.0245	25.0245	1.14831	0.0458876	2	24.7442	24.7442	NaN	NaN	1	24.5162	24.5162	NaN	NaN	1	25.3559	25.3559	NaN	NaN	1	NaN	24.5353
P26368	Splicing factor U2AF 65 kDa subunit	U2AF2	30.1082	30.0728	0.184503	0.006128	3	30.3628	30.406	0.161728	0.00532651	3	30.2617	30.3149	0.120889	0.00399478	3	30.0554	29.7074	0.850478	0.028297	3	29.7558	29.7578	0.472314	0.015873	3	29.8454	29.9413	0.448693	0.0150339	3	29.5594	29.6087	0.401326	0.0135769	3	29.724	29.7273	0.0699805	0.00235434	3	29.9827	29.9183	0.253683	0.00846099	3	30.3079	30.4986
P26373	60S ribosomal protein L13	RPL13	28.2034	28.2034	0.0103971	0.000368648	2	27.7424	27.7424	0.423015	0.015248	2	27.6709	27.6709	0.256876	0.00928324	2	27.3921	27.3757	0.185448	0.00677013	3	27.6405	27.6405	0.275122	0.00995358	2	26.7081	26.642	0.337917	0.0126522	3	26.5311	26.5311	NaN	NaN	1	NaN	NaN	NaN	NaN	0	NaN	NaN	NaN	NaN	0	28.2108	27.4433
P26440	Isovaleryl-CoA dehydrogenase, mitochondrial	IVD	NaN	NaN	NaN	NaN	0	26.8906	26.8906	NaN	NaN	1	NaN	NaN	NaN	NaN	0	27.9637	27.9637	NaN	NaN	1	26.1445	26.1445	NaN	NaN	1	25.5964	25.5964	NaN	NaN	1	NaN	NaN	NaN	NaN	0	NaN	NaN	NaN	NaN	0	NaN	NaN	NaN	NaN	0	NaN	NaN
P26447	Protein S100-A4	S100A4	29.4742	29.5026	0.67886	0.0230323	3	29.8963	29.8122	0.294236	0.00984188	3	29.4678	29.5148	0.130397	0.00442507	3	29.8056	30.4114	1.27987	0.0429407	3	29.2839	29.514	0.596967	0.0203855	3	29.5195	29.5195	0.852646	0.0288842	2	29.4616	29.6603	0.942883	0.0320038	3	29.0171	28.7606	0.552623	0.0190447	3	29.2071	28.7371	1.0058	0.0344369	3	28.7816	30.2234
P26583	High mobility group protein B2	HMGB2	27.2979	27.2979	NaN	NaN	1	27.8589	27.8589	NaN	NaN	1	27.48	27.4967	0.216419	0.00787553	3	29.0698	29.0698	NaN	NaN	1	28.2398	28.2398	0.546516	0.0193527	2	28.9408	28.9408	NaN	NaN	1	28.6307	28.6307	0.721287	0.0251928	2	29.1194	29.2003	0.236416	0.00811883	3	28.532	28.532	0.11865	0.0041585	2	NaN	27.8589
P26599	Polypyrimidine tract-binding protein 1	PTBP1	32.2737	32.3579	0.30429	0.00942844	3	31.6232	31.5942	0.382403	0.0120925	3	31.8698	31.7613	0.493852	0.0154959	3	31.4148	31.6918	0.714028	0.0227291	3	31.7867	31.7146	0.153194	0.00481945	3	31.3961	31.3354	0.849625	0.0270615	3	32.209	32.4824	0.474494	0.0147317	3	32.1582	32.1384	0.35843	0.0111458	3	32.1471	31.9541	0.550302	0.0171182	3	31.9361	32.0192
P26639	Threonine--tRNA ligase, cytoplasmic	TARS	27.6474	27.7384	0.54488	0.0197081	3	27.3049	26.8636	1.18253	0.0433084	3	27.5233	27.6743	0.557461	0.0202542	3	27.8014	27.8427	0.719282	0.0258721	3	27.8794	27.5828	0.546853	0.019615	3	27.9908	27.9908	0.0451261	0.00161218	2	28.331	28.331	0.253524	0.00894867	2	27.5923	27.9301	0.808274	0.0292934	3	28.2211	28.2211	0.477268	0.0169117	2	28.1411	28.6446
P26640	Valine--tRNA ligase	VARS	27.2152	27.281	0.641588	0.0235746	3	27.3589	27.4084	0.221132	0.00808263	3	27.2573	26.8908	0.697464	0.0255882	3	27.1342	27.1342	0.663428	0.0244499	2	27.5436	27.5347	0.266335	0.00966957	3	27.7744	27.8109	0.366065	0.0131799	3	27.0447	27.2684	0.688821	0.0254697	3	27.6264	27.6264	0.0432258	0.00156466	2	27.4256	27.4256	NaN	NaN	1	27.281	27.1172
P26641	Elongation factor 1-gamma	EEF1G	30.2644	30.3925	0.240196	0.00793661	3	30.0344	29.983	0.464449	0.0154639	3	30.2048	30.2319	0.115321	0.00381798	3	30.5136	30.4425	0.359898	0.0117947	3	30.3091	30.2578	0.181773	0.00599729	3	30.4529	30.2932	0.53193	0.0174673	3	29.8011	29.6978	0.478964	0.016072	3	30.3096	30.308	0.32935	0.0108662	3	30.0325	30.1771	0.277906	0.00925349	3	29.9873	30.5224
P26885	Peptidyl-prolyl cis-trans isomerase FKBP2	FKBP2	NaN	NaN	NaN	NaN	0	27.43	27.43	NaN	NaN	1	24.5468	24.5468	NaN	NaN	1	NaN	NaN	NaN	NaN	0	26.9772	26.9772	NaN	NaN	1	NaN	NaN	NaN	NaN	0	NaN	NaN	NaN	NaN	0	NaN	NaN	NaN	NaN	0	NaN	NaN	NaN	NaN	0	NaN	NaN
P26927	Hepatocyte growth factor-like protein;Hepatocyte growth factor-like protein alpha chain;Hepatocyte growth factor-like protein beta chain;Putative macrophage stimulating 1-like protein	MST1	28.6294	28.6294	NaN	NaN	1	NaN	NaN	NaN	NaN	0	NaN	NaN	NaN	NaN	0	29.6742	29.6742	NaN	NaN	1	NaN	NaN	NaN	NaN	0	NaN	NaN	NaN	NaN	0	30.056	30.056	1.24803	0.0415233	2	NaN	NaN	NaN	NaN	0	29.6313	29.6313	NaN	NaN	1	NaN	NaN
P27105	Erythrocyte band 7 integral membrane protein	STOM	25.2121	25.2121	0.400311	0.0158778	2	NaN	NaN	NaN	NaN	0	26.55	26.55	NaN	NaN	1	NaN	NaN	NaN	NaN	0	NaN	NaN	NaN	NaN	0	NaN	NaN	NaN	NaN	0	NaN	NaN	NaN	NaN	0	25.7615	25.7615	0.905397	0.0351454	2	26.0731	26.0731	NaN	NaN	1	24.929	NaN
P27169	Serum paraoxonase/arylesterase 1	PON1	28.7036	28.6778	0.645489	0.0224881	3	29.029	29.4207	0.694475	0.0239235	3	28.3386	28.3386	0.210892	0.00744185	2	30.1262	30.4613	0.593226	0.0196913	3	29.1759	29.1759	1.51447	0.0519082	2	28.5808	28.5594	0.196046	0.00685936	3	29.4622	29.4477	0.348137	0.0118164	3	29.0253	29.0253	0.1286	0.00443062	2	29.5991	29.5991	NaN	NaN	1	29.3616	29.4207
P27338	Amine oxidase [flavin-containing] B	MAOB	25.7216	25.7216	NaN	NaN	1	25.4913	25.4913	NaN	NaN	1	26.3886	26.449	0.958195	0.036311	3	27.2569	27.2569	NaN	NaN	1	25.8997	25.8997	0.395928	0.015287	2	26.806	26.806	NaN	NaN	1	26.7544	26.7544	0.855504	0.0319762	2	26.764	26.764	NaN	NaN	1	26.4634	26.4634	0.774294	0.029259	2	NaN	25.4913
P27348	14-3-3 protein theta	YWHAQ	30.8844	30.7002	0.605003	0.0195893	3	30.9778	31.0187	0.196288	0.00633641	3	30.6303	30.7191	0.258436	0.00843727	3	30.6012	30.2359	0.671655	0.0219486	3	31.3395	31.1989	0.641031	0.0204544	3	31.269	31.3084	0.128642	0.00411405	3	31.303	31.2689	0.215753	0.00689242	3	31.202	31.4151	0.435248	0.0139494	3	31.6559	31.6855	0.426785	0.013482	3	30.7002	31.0187
P27361	Mitogen-activated protein kinase 3	MAPK3	NaN	NaN	NaN	NaN	0	NaN	NaN	NaN	NaN	0	NaN	NaN	NaN	NaN	0	27.0439	27.0439	NaN	NaN	1	21.6435	21.6435	NaN	NaN	1	22.1588	22.1588	NaN	NaN	1	NaN	NaN	NaN	NaN	0	NaN	NaN	NaN	NaN	0	NaN	NaN	NaN	NaN	0	NaN	NaN
P27448	MAP/microtubule affinity-regulating kinase 3;Serine/threonine-protein kinase MARK2;Serine/threonine-protein kinase MARK1	MARK3	32.1132	32.1958	0.152172	0.00473862	3	32.5351	32.5351	NaN	NaN	1	31.9781	31.9086	0.270794	0.0084681	3	32.1897	32.1897	NaN	NaN	1	32.1946	32.1946	NaN	NaN	1	32.3995	32.3995	0.190846	0.00589041	2	NaN	NaN	NaN	NaN	0	32.2818	32.2818	NaN	NaN	1	NaN	NaN	NaN	NaN	0	31.9375	NaN
P27482	Calmodulin-like protein 3	CALML3	NaN	NaN	NaN	NaN	0	NaN	NaN	NaN	NaN	0	NaN	NaN	NaN	NaN	0	30.8159	30.8159	NaN	NaN	1	NaN	NaN	NaN	NaN	0	31.3135	31.3135	NaN	NaN	1	31.035	31.035	0.132508	0.00426964	2	30.85	31.1483	0.652114	0.0211382	3	30.9398	30.6379	0.944718	0.0305341	3	NaN	NaN
P27487	Dipeptidyl peptidase 4;Dipeptidyl peptidase 4 membrane form;Dipeptidyl peptidase 4 soluble form	DPP4	26.3459	26.3459	NaN	NaN	1	25.8398	25.8398	NaN	NaN	1	28.1077	28.1077	2.07424	0.0737961	2	NaN	NaN	NaN	NaN	0	NaN	NaN	NaN	NaN	0	27.5371	27.5371	NaN	NaN	1	NaN	NaN	NaN	NaN	0	27.1179	27.1179	NaN	NaN	1	NaN	NaN	NaN	NaN	0	NaN	NaN
P27635	60S ribosomal protein L10;60S ribosomal protein L10-like	RPL10	29.829	30.3108	1.40501	0.0471022	3	29.0627	28.5109	0.972544	0.0334636	3	29.9664	29.9248	0.183599	0.00612682	3	29.2816	29.2816	NaN	NaN	1	29.734	29.734	0.553855	0.018627	2	29.8993	29.8993	0.391205	0.0130841	2	28.9164	28.6888	0.540564	0.018694	3	27.7274	27.7274	1.11642	0.0402641	2	29.4345	29.563	0.720298	0.0244712	3	28.2465	30.1857
P27694	Replication protein A 70 kDa DNA-binding subunit;Replication protein A 70 kDa DNA-binding subunit, N-terminally processed	RPA1	28.9531	29.2838	0.640315	0.0221156	3	28.9681	29.0884	0.372019	0.0128424	3	28.8326	28.8627	0.195978	0.0067971	3	28.7558	28.9334	0.472299	0.0164245	3	29.0378	28.9978	0.32132	0.0110656	3	28.7776	28.6877	0.491784	0.0170891	3	28.5654	28.8555	0.592036	0.0207256	3	28.8305	28.8925	0.13536	0.00469503	3	28.8878	28.9128	0.115791	0.00400828	3	29.2838	29.265
P27695	DNA-(apurinic or apyrimidinic site) lyase;DNA-(apurinic or apyrimidinic site) lyase, mitochondrial	APEX1	NaN	NaN	NaN	NaN	0	26.4991	26.4991	NaN	NaN	1	NaN	NaN	NaN	NaN	0	NaN	NaN	NaN	NaN	0	NaN	NaN	NaN	NaN	0	NaN	NaN	NaN	NaN	0	NaN	NaN	NaN	NaN	0	NaN	NaN	NaN	NaN	0	NaN	NaN	NaN	NaN	0	NaN	26.4991
P27707	Deoxycytidine kinase	DCK	26.4709	26.4709	NaN	NaN	1	NaN	NaN	NaN	NaN	0	25.9308	25.9308	NaN	NaN	1	NaN	NaN	NaN	NaN	0	26.3682	26.3682	NaN	NaN	1	26.8169	26.8169	NaN	NaN	1	25.8299	25.8299	NaN	NaN	1	NaN	NaN	NaN	NaN	0	NaN	NaN	NaN	NaN	0	26.4709	NaN
P27708	CAD protein;Glutamine-dependent carbamoyl-phosphate synthase;Aspartate carbamoyltransferase;Dihydroorotase	CAD	28.6472	28.6472	0.248642	0.00867946	2	28.332	28.1279	0.43411	0.0153223	3	28.9562	28.9319	0.388595	0.0134201	3	28.7637	28.9354	0.511383	0.0177788	3	28.6009	28.6009	NaN	NaN	1	28.7211	28.8664	1.16326	0.0405019	3	29.2186	29.2186	0.000473393	1.62018e-05	2	28.707	28.7782	0.310565	0.0108185	3	29.4129	29.4129	0.249322	0.0084766	2	28.4714	28.8305
P27797	Calreticulin	CALR	30.1487	30.0453	0.296864	0.00984667	3	29.8294	30.2111	0.66239	0.0222059	3	30.5341	30.5411	0.026144	0.000856221	3	30.1081	30.1392	0.412909	0.0137142	3	29.9078	29.9773	0.230882	0.00771981	3	30.147	29.8801	0.752521	0.0249617	3	30.3623	30.3498	0.0474378	0.00156239	3	30.3219	30.4807	0.301306	0.00993688	3	29.8612	29.8536	0.142676	0.00477796	3	30.4834	30.2127
P27816	Microtubule-associated protein 4	MAP4	29.1056	29.6947	1.09475	0.0376131	3	28.9502	29.0849	1.21723	0.0420456	3	29.3371	29.4965	0.407322	0.0138842	3	27.8762	27.9274	0.398458	0.0142938	3	28.6384	28.803	0.334408	0.0116769	3	28.2313	28.1349	0.208855	0.007398	3	26.9801	26.9801	0.137755	0.00510578	2	28.4796	28.614	0.328127	0.0115215	3	27.5037	27.2486	1.41992	0.0516267	3	29.6947	29.0849
P27824	Calnexin	CANX	29.9393	29.9709	0.0768387	0.00256648	3	29.101	29.685	1.23465	0.0424264	3	29.8618	29.8289	0.129419	0.00433393	3	30.226	30.226	0.0435374	0.0014404	2	30.2732	30.4534	0.374584	0.0123735	3	29.1375	29.2019	0.54057	0.0185524	3	28.5839	28.1351	1.0205	0.035702	3	29.0468	28.6698	0.791923	0.0272637	3	27.7444	27.6587	0.243141	0.00876361	3	29.8517	29.9352
P27918	Properdin	CFP	29.825	29.825	NaN	NaN	1	NaN	NaN	NaN	NaN	0	28.2142	28.2142	NaN	NaN	1	28.1608	28.1608	NaN	NaN	1	NaN	NaN	NaN	NaN	0	27.9376	27.9376	NaN	NaN	1	NaN	NaN	NaN	NaN	0	NaN	NaN	NaN	NaN	0	NaN	NaN	NaN	NaN	0	29.825	NaN
P28066	Proteasome subunit alpha type-5	PSMA5	29.0689	29.1654	0.346643	0.0119249	3	30.0716	30.2765	0.624067	0.0207527	3	29.2566	29.2205	0.0670947	0.00229332	3	29.0539	28.8937	0.322971	0.0111163	3	29.6497	29.6195	0.516436	0.0174179	3	29.0053	29.2382	0.735965	0.0253735	3	28.7743	28.636	0.400958	0.0139346	3	29.381	29.3065	0.129023	0.00439138	3	29.0924	29.2022	0.400279	0.0137589	3	28.6842	29.3709
P28070	Proteasome subunit beta type-4	PSMB4	28.1422	28.3309	0.41181	0.0146332	3	28.1109	28.0566	0.56686	0.0201651	3	27.5823	27.5204	0.107565	0.00389976	3	27.5744	27.4741	0.290993	0.010553	3	27.7939	28.0324	0.440123	0.0158352	3	27.4731	27.6857	0.370991	0.0135038	3	27.6315	27.6315	0.39248	0.0142041	2	28.356	28.356	0.28458	0.010036	2	27.5326	27.5326	1.11224	0.0403974	2	28.4257	28.0566
P28072	Proteasome subunit beta type-6	PSMB6	28.3026	28.3026	NaN	NaN	1	28.6679	28.6679	NaN	NaN	1	NaN	NaN	NaN	NaN	0	NaN	NaN	NaN	NaN	0	27.139	27.139	NaN	NaN	1	26.8665	26.8665	0.265556	0.0098843	2	27.5463	27.5463	NaN	NaN	1	28.5148	28.932	1.03245	0.0362074	3	NaN	NaN	NaN	NaN	0	NaN	NaN
P28074	Proteasome subunit beta type-5	PSMB5	28.778	29.0471	0.949452	0.0329923	3	29.1978	29.4618	0.481872	0.0165037	3	29.4006	29.568	0.472055	0.016056	3	30.1009	30.1009	1.18741	0.0394478	2	29.1866	28.9674	0.798049	0.027343	3	29.405	29.2332	0.556757	0.0189341	3	29.515	29.5633	0.0963697	0.00326511	3	30.0578	29.9986	0.771494	0.0256671	3	29.3085	29.2368	0.43235	0.0147517	3	29.5639	29.49
P28288	ATP-binding cassette sub-family D member 3	ABCD3	26.6933	26.6933	NaN	NaN	1	NaN	NaN	NaN	NaN	0	26.5319	26.5319	NaN	NaN	1	NaN	NaN	NaN	NaN	0	26.8761	26.8761	NaN	NaN	1	NaN	NaN	NaN	NaN	0	NaN	NaN	NaN	NaN	0	NaN	NaN	NaN	NaN	0	NaN	NaN	NaN	NaN	0	NaN	NaN
P28290	Sperm-specific antigen 2	SSFA2	27.0477	27.0477	0.227489	0.00841067	2	NaN	NaN	NaN	NaN	0	27.1254	27.0905	0.481367	0.0177459	3	NaN	NaN	NaN	NaN	0	29.5899	29.5899	3.29947	0.111507	2	26.764	26.764	NaN	NaN	1	26.4299	26.4299	NaN	NaN	1	27.1321	27.1321	NaN	NaN	1	NaN	NaN	NaN	NaN	0	26.8868	NaN
P28331	NADH-ubiquinone oxidoreductase 75 kDa subunit, mitochondrial	NDUFS1	25.9004	25.9004	1.45001	0.0559842	2	NaN	NaN	NaN	NaN	0	27.1915	27.1915	1.20381	0.0442714	2	27.2476	27.2476	0.889299	0.0326377	2	27.4993	27.4993	1.84283	0.0670138	2	27.0184	27.0184	0.785472	0.0290717	2	NaN	NaN	NaN	NaN	0	27.5417	27.5417	NaN	NaN	1	NaN	NaN	NaN	NaN	0	26.9257	NaN
P28340	DNA polymerase delta catalytic subunit	POLD1	NaN	NaN	NaN	NaN	0	NaN	NaN	NaN	NaN	0	NaN	NaN	NaN	NaN	0	26.3564	26.3564	NaN	NaN	1	NaN	NaN	NaN	NaN	0	25.9747	25.9747	NaN	NaN	1	NaN	NaN	NaN	NaN	0	NaN	NaN	NaN	NaN	0	NaN	NaN	NaN	NaN	0	NaN	NaN
P28347	Transcriptional enhancer factor TEF-1;Transcriptional enhancer factor TEF-3;Transcriptional enhancer factor TEF-5;Transcriptional enhancer factor TEF-4	TEAD1	26.9282	26.9282	NaN	NaN	1	NaN	NaN	NaN	NaN	0	NaN	NaN	NaN	NaN	0	NaN	NaN	NaN	NaN	0	NaN	NaN	NaN	NaN	0	NaN	NaN	NaN	NaN	0	NaN	NaN	NaN	NaN	0	NaN	NaN	NaN	NaN	0	NaN	NaN	NaN	NaN	0	NaN	NaN
P28370	Probable global transcription activator SNF2L1	SMARCA1	24.7381	24.7381	NaN	NaN	1	NaN	NaN	NaN	NaN	0	NaN	NaN	NaN	NaN	0	NaN	NaN	NaN	NaN	0	NaN	NaN	NaN	NaN	0	NaN	NaN	NaN	NaN	0	NaN	NaN	NaN	NaN	0	NaN	NaN	NaN	NaN	0	NaN	NaN	NaN	NaN	0	NaN	NaN
P28482	Mitogen-activated protein kinase 1	MAPK1	26.4227	26.4227	NaN	NaN	1	26.0637	26.0637	NaN	NaN	1	26.3074	26.3074	NaN	NaN	1	NaN	NaN	NaN	NaN	0	24.0784	24.0784	4.69688	0.195066	2	21.1584	21.1584	NaN	NaN	1	NaN	NaN	NaN	NaN	0	NaN	NaN	NaN	NaN	0	NaN	NaN	NaN	NaN	0	NaN	NaN
P28676	Grancalcin	GCA	25.5603	25.5603	0.231889	0.00907223	2	25.56	25.6476	0.568091	0.0222258	3	25.6673	25.6673	0.0247149	0.000962895	2	NaN	NaN	NaN	NaN	0	25.5984	25.5984	NaN	NaN	1	25.5654	25.5654	0.910712	0.0356229	2	NaN	NaN	NaN	NaN	0	NaN	NaN	NaN	NaN	0	25.9716	25.9716	0.198847	0.00765633	2	25.7242	25.6476
P28838	Cytosol aminopeptidase	LAP3	27.5578	27.3082	0.519825	0.0188631	3	27.9899	28.1388	0.304109	0.0108649	3	27.5632	27.3082	0.48712	0.0176728	3	27.9218	27.9218	NaN	NaN	1	27.6655	27.6655	0.331212	0.011972	2	27.536	27.536	0.991081	0.0359922	2	27.6687	27.6687	NaN	NaN	1	28.6582	28.1686	1.09517	0.0382149	3	27.5832	27.5832	NaN	NaN	1	27.3082	28.1388
P29084	Transcription initiation factor IIE subunit beta	GTF2E2	NaN	NaN	NaN	NaN	0	NaN	NaN	NaN	NaN	0	24.0585	24.0585	NaN	NaN	1	NaN	NaN	NaN	NaN	0	NaN	NaN	NaN	NaN	0	24.3927	24.3927	NaN	NaN	1	NaN	NaN	NaN	NaN	0	NaN	NaN	NaN	NaN	0	NaN	NaN	NaN	NaN	0	NaN	NaN
P29144	Tripeptidyl-peptidase 2	TPP2	NaN	NaN	NaN	NaN	0	24.8454	24.8454	NaN	NaN	1	NaN	NaN	NaN	NaN	0	NaN	NaN	NaN	NaN	0	25.9579	25.9579	0.493991	0.0190304	2	NaN	NaN	NaN	NaN	0	NaN	NaN	NaN	NaN	0	26.2981	25.395	2.02941	0.0771693	3	NaN	NaN	NaN	NaN	0	NaN	NaN
P29218	Inositol monophosphatase 1	IMPA1	27.8599	27.9712	0.309827	0.0111209	3	27.8266	27.8266	0.168028	0.00603839	2	27.8305	27.8305	0.131338	0.0047192	2	27.8128	27.9811	0.583749	0.0209885	3	27.41	27.282	0.428423	0.0156302	3	27.1105	27.0959	0.321079	0.0118433	3	27.8346	27.8346	0.399816	0.014364	2	27.399	27.399	0.52662	0.0192204	2	28.0049	28.0049	0.0708499	0.00252991	2	28.0986	27.9454
P29317	Ephrin type-A receptor 2	EPHA2	26.3738	26.3738	0.369467	0.0140089	2	26.4006	26.4006	0.202865	0.00768408	2	26.4513	26.4513	0.15779	0.00596528	2	NaN	NaN	NaN	NaN	0	27.0296	27.0296	NaN	NaN	1	NaN	NaN	NaN	NaN	0	NaN	NaN	NaN	NaN	0	NaN	NaN	NaN	NaN	0	26.0446	26.0446	NaN	NaN	1	26.1126	26.2572
P29350	Tyrosine-protein phosphatase non-receptor type 6	PTPN6	NaN	NaN	NaN	NaN	0	NaN	NaN	NaN	NaN	0	NaN	NaN	NaN	NaN	0	NaN	NaN	NaN	NaN	0	NaN	NaN	NaN	NaN	0	27.8875	27.8875	NaN	NaN	1	28.5566	28.5566	0.0793831	0.00277985	2	28.0162	28.0162	NaN	NaN	1	NaN	NaN	NaN	NaN	0	NaN	NaN
P29373	Cellular retinoic acid-binding protein 2	CRABP2	28.2857	28.2857	0.432111	0.0152767	2	28.0594	28.0594	0.158854	0.00566135	2	28.2116	28.2116	0.127321	0.00451309	2	28.2965	28.2965	0.529254	0.0187038	2	27.5508	27.5508	0.74746	0.0271302	2	28.1067	28.1067	0.158736	0.00564765	2	27.9336	27.9336	0.0314759	0.00112681	2	27.8469	27.8469	0.114294	0.00410438	2	28.1655	28.2593	0.738944	0.0262358	3	NaN	27.947
P29401	Transketolase	TKT	29.9176	29.9178	0.0668986	0.00223609	3	29.9647	29.9684	0.222033	0.00740983	3	30.1291	30.1074	0.0480515	0.00159485	3	30.0024	30.006	0.266262	0.00887469	3	29.9904	30.059	0.145444	0.00484968	3	30.0069	29.9468	0.418124	0.0139343	3	30.2089	30.1585	0.131808	0.00436322	3	30.1144	30.0117	0.198734	0.0065993	3	30.0138	30.0486	0.202725	0.00675439	3	29.9844	29.7408
P29622	Kallistatin	SERPINA4	29.821	29.6345	0.580704	0.019473	3	29.2188	29.3808	0.559358	0.0191438	3	27.9937	27.5764	0.810879	0.0289665	3	30.5694	30.7449	0.806528	0.0263835	3	28.5817	27.9085	1.40394	0.0491203	3	27.7615	27.8531	0.34809	0.0125386	3	29.6561	29.4845	0.573856	0.0193504	3	28.6884	28.789	1.0554	0.0367885	3	30.1562	30.1562	NaN	NaN	1	30.4721	29.6792
P29692	Elongation factor 1-delta	EEF1D	31.2112	31.0924	0.266057	0.00852443	3	31.1901	31.558	1.33496	0.0428008	3	31.3232	31.3928	0.342315	0.0109285	3	31.2218	31.1341	0.383901	0.0122959	3	31.5207	31.7291	0.368944	0.0117048	3	31.3364	31.4458	0.306677	0.00978661	3	30.6346	30.5892	0.244432	0.00797897	3	31.2675	30.9435	0.637842	0.0203996	3	30.8918	30.8796	0.192281	0.00622433	3	31.0924	32.3026
P29966	Myristoylated alanine-rich C-kinase substrate	MARCKS	26.7223	26.7223	0.321351	0.0120256	2	NaN	NaN	NaN	NaN	0	27.6161	27.8134	0.515583	0.0186697	3	26.5404	26.5404	NaN	NaN	1	26.4628	26.4628	1.45502	0.0549836	2	25.1214	25.1214	NaN	NaN	1	NaN	NaN	NaN	NaN	0	26.4692	26.4692	NaN	NaN	1	26.3115	26.3115	NaN	NaN	1	26.9495	NaN
P30038	Delta-1-pyrroline-5-carboxylate dehydrogenase, mitochondrial	ALDH4A1	NaN	NaN	NaN	NaN	0	25.7306	25.7306	NaN	NaN	1	NaN	NaN	NaN	NaN	0	NaN	NaN	NaN	NaN	0	NaN	NaN	NaN	NaN	0	NaN	NaN	NaN	NaN	0	NaN	NaN	NaN	NaN	0	NaN	NaN	NaN	NaN	0	NaN	NaN	NaN	NaN	0	NaN	25.7306
P30040	Endoplasmic reticulum resident protein 29	ERP29	28.9689	29.1229	0.495067	0.0170896	3	29.2146	29.2806	0.346405	0.0118573	3	28.874	28.8801	0.091291	0.0031617	3	28.5717	28.5717	0.073345	0.00256705	2	28.7904	28.7904	0.494074	0.0171611	2	28.8823	28.8823	0.221922	0.00768367	2	28.6116	28.6116	0.747395	0.0261221	2	29.162	29.2184	0.12211	0.0041873	3	29.1659	28.9563	0.475418	0.0163005	3	29.3687	28.8399
P30041	Peroxiredoxin-6	PRDX6	29.3073	29.3976	0.16628	0.00567367	3	29.4289	29.3311	0.272181	0.00924876	3	29.6358	29.6856	0.0985238	0.00332449	3	29.7315	29.7088	0.0893938	0.0030067	3	29.258	28.9289	0.591577	0.0202193	3	29.4585	29.6241	0.384782	0.0130619	3	29.3685	29.3685	0.0887808	0.00302299	2	29.4662	29.2915	0.446339	0.0151475	3	29.4223	29.5839	0.612788	0.0208273	3	29.3976	29.3311
P30043	Flavin reductase (NADPH)	BLVRB	28.5383	28.5383	NaN	NaN	1	NaN	NaN	NaN	NaN	0	27.3577	27.3577	NaN	NaN	1	27.4004	27.4004	0.563279	0.0205573	2	26.3977	26.3977	0.0800615	0.0030329	2	NaN	NaN	NaN	NaN	0	NaN	NaN	NaN	NaN	0	27.4025	27.4025	NaN	NaN	1	NaN	NaN	NaN	NaN	0	28.5383	NaN
P30044	Peroxiredoxin-5, mitochondrial	PRDX5	29.1204	29.4543	0.787376	0.0270386	3	29.4459	29.4459	0.651323	0.0221193	2	29.2665	29.2665	0.810505	0.0276939	2	29.6473	29.6473	0.113533	0.00382947	2	29.7514	29.7514	0.359798	0.0120935	2	29.6226	29.4544	0.3438	0.011606	3	29.6053	29.5754	0.28313	0.00956347	3	29.7707	29.4459	0.589613	0.0198051	3	29.6811	29.6811	0.217292	0.00732087	2	28.2211	29.9064
P30046	D-dopachrome decarboxylase;D-dopachrome decarboxylase-like protein	DDT	25.7432	25.7432	0.352624	0.0136977	2	26.0861	26.0861	0.470298	0.0180287	2	26.5403	26.5403	0.223583	0.00842428	2	28.1375	28.1375	NaN	NaN	1	26.8971	26.2202	1.42462	0.0529657	3	27.2337	27.2337	NaN	NaN	1	28.8406	28.8406	0.276819	0.00959826	2	28.9247	28.9247	1.04559	0.0361487	2	27.5505	27.5505	0.962757	0.0349452	2	25.9926	NaN
P30048	Thioredoxin-dependent peroxide reductase, mitochondrial	PRDX3	29.9233	30.0982	0.476833	0.0159351	3	29.54	29.6674	0.256311	0.00867674	3	29.9126	29.9991	0.421278	0.0140836	3	30.0974	29.8461	0.866396	0.0287864	3	29.4667	29.8422	1.12707	0.0382491	3	29.5949	29.5684	0.455016	0.0153748	3	30.8135	30.8171	0.22378	0.0072624	3	30.0956	30.2237	0.336415	0.0111782	3	30.1715	29.8701	1.08585	0.0359894	3	30.288	29.6674
P30049	ATP synthase subunit delta, mitochondrial	ATP5D	28.5807	28.5807	NaN	NaN	1	NaN	NaN	NaN	NaN	0	NaN	NaN	NaN	NaN	0	28.2896	28.2896	NaN	NaN	1	NaN	NaN	NaN	NaN	0	NaN	NaN	NaN	NaN	0	28.1751	28.1751	0.204012	0.00724088	2	28.3474	28.3474	NaN	NaN	1	28.1026	28.1026	0.58629	0.0208625	2	28.5807	NaN
P30050	60S ribosomal protein L12	RPL12	30.158	30.0074	0.282737	0.00937519	3	29.9472	29.9828	0.43281	0.0144524	3	30.0451	29.9181	0.246106	0.00819124	3	30.1587	30.0739	0.3001	0.0099507	3	29.9683	29.9096	0.289506	0.00966043	3	30.3528	30.2864	0.20729	0.00682934	3	30.6539	30.6617	0.120863	0.00394284	3	30.3771	30.3455	0.0861314	0.0028354	3	30.5355	30.2489	0.511627	0.0167551	3	29.9824	29.9828
P30084	Enoyl-CoA hydratase, mitochondrial	ECHS1	28.0018	28.0018	0.693981	0.0247835	2	28.1061	28.1122	0.233029	0.00829106	3	28.1226	28.1207	0.0652432	0.00231996	3	27.6492	27.6492	0.237185	0.00857837	2	27.0317	26.8485	0.43915	0.0162457	3	27.1546	27.3365	1.05483	0.0388454	3	27.5105	27.5105	NaN	NaN	1	NaN	NaN	NaN	NaN	0	28.472	28.472	NaN	NaN	1	28.4925	27.8701
P30085	UMP-CMP kinase	CMPK1	27.506	27.506	0.0450074	0.00163627	2	NaN	NaN	NaN	NaN	0	27.0509	27.0509	0.004769	0.000176297	2	27.493	27.493	0.670523	0.0243889	2	28.2354	28.2354	NaN	NaN	1	26.1289	26.1289	NaN	NaN	1	27.9055	27.9055	0.152379	0.00546052	2	27.4391	27.4391	NaN	NaN	1	27.7184	27.7184	NaN	NaN	1	27.5379	NaN
P30086	Phosphatidylethanolamine-binding protein 1;Hippocampal cholinergic neurostimulating peptide	PEBP1	29.0366	28.6714	0.661277	0.0227739	3	29.2851	29.271	0.0465033	0.00158795	3	29.5639	29.666	0.201861	0.00682797	3	29.5905	29.3497	0.483261	0.0163316	3	29.2508	29.1003	0.326753	0.0111708	3	29.7149	29.3775	0.794734	0.0267453	3	29.6482	29.3162	0.64011	0.0215902	3	29.6495	29.9457	0.678105	0.0228707	3	29.737	29.737	NaN	NaN	1	28.6714	29.2473
P30101	Protein disulfide-isomerase A3	PDIA3	30.7007	30.7462	0.22546	0.00734381	3	30.802	30.8923	0.175134	0.00568579	3	30.7062	30.648	0.243501	0.00793002	3	30.7872	30.5833	0.386921	0.0125676	3	30.7526	30.8504	0.228067	0.00741621	3	30.4845	30.3406	0.439915	0.0144308	3	31.028	31.0481	0.128737	0.00414907	3	31.1984	31.2051	0.278083	0.00891338	3	30.8756	30.8794	0.183905	0.00595633	3	30.8999	30.8923
P30153	Serine/threonine-protein phosphatase 2A 65 kDa regulatory subunit A alpha isoform	PPP2R1A	28.4895	28.3455	0.350336	0.012297	3	28.0011	27.9622	0.223144	0.0079691	3	27.8185	28.4383	1.20963	0.0434829	3	27.523	27.4002	0.379049	0.0137721	3	28.1381	28.3367	0.539899	0.0191874	3	28.107	28.0576	0.338859	0.0120561	3	28.5272	28.3667	0.344398	0.0120726	3	28.4036	28.5105	0.53474	0.0188265	3	28.7816	28.4072	0.678245	0.0235652	3	28.234	27.8
P30154	Serine/threonine-protein phosphatase 2A 65 kDa regulatory subunit A beta isoform	PPP2R1B	NaN	NaN	NaN	NaN	0	25.1321	25.1321	0.310814	0.0123672	2	NaN	NaN	NaN	NaN	0	NaN	NaN	NaN	NaN	0	NaN	NaN	NaN	NaN	0	NaN	NaN	NaN	NaN	0	NaN	NaN	NaN	NaN	0	NaN	NaN	NaN	NaN	0	NaN	NaN	NaN	NaN	0	NaN	25.3519
P30405	Peptidyl-prolyl cis-trans isomerase F, mitochondrial	PPIF	25.4297	25.4297	NaN	NaN	1	NaN	NaN	NaN	NaN	0	25.6349	25.6349	0.240693	0.00938927	2	28.3553	28.3553	NaN	NaN	1	25.0958	25.0958	0.879703	0.0350538	2	28.1271	28.1271	NaN	NaN	1	27.1165	27.1165	1.79179	0.0660774	2	25.3055	25.3055	NaN	NaN	1	26.239	25.9077	0.693625	0.0264349	3	25.4297	NaN
P30419	Glycylpeptide N-tetradecanoyltransferase 1	NMT1	26.9444	26.9444	0.527366	0.0195724	2	27.0849	27.0849	1.17473	0.043372	2	26.6083	26.5785	0.07639	0.00287091	3	26.4351	26.4351	NaN	NaN	1	NaN	NaN	NaN	NaN	0	27.0536	27.0536	0.0523565	0.00193529	2	NaN	NaN	NaN	NaN	0	NaN	NaN	NaN	NaN	0	NaN	NaN	NaN	NaN	0	26.5715	NaN
P30519	Heme oxygenase 2	HMOX2	NaN	NaN	NaN	NaN	0	28.053	28.053	NaN	NaN	1	27.8624	27.8624	0.441483	0.0158451	2	NaN	NaN	NaN	NaN	0	26.4048	26.4048	NaN	NaN	1	NaN	NaN	NaN	NaN	0	NaN	NaN	NaN	NaN	0	NaN	NaN	NaN	NaN	0	NaN	NaN	NaN	NaN	0	NaN	NaN
P30520	Adenylosuccinate synthetase isozyme 2	ADSS	26.8893	26.8893	NaN	NaN	1	NaN	NaN	NaN	NaN	0	26.8088	26.8088	NaN	NaN	1	26.7474	26.7474	NaN	NaN	1	26.2089	26.2089	NaN	NaN	1	27.4076	27.4076	NaN	NaN	1	NaN	NaN	NaN	NaN	0	25.9972	25.9972	NaN	NaN	1	27.2457	27.2457	NaN	NaN	1	26.8893	NaN
P30533	Alpha-2-macroglobulin receptor-associated protein	LRPAP1	26.9822	26.9822	NaN	NaN	1	27.7076	27.7076	0.387812	0.0139966	2	NaN	NaN	NaN	NaN	0	29.8652	29.8652	NaN	NaN	1	NaN	NaN	NaN	NaN	0	29.5202	29.5202	0.00894457	0.000302999	2	29.8416	29.2995	1.01045	0.0338606	3	NaN	NaN	NaN	NaN	0	28.4896	28.4896	NaN	NaN	1	NaN	27.9819
P30536	Translocator protein	TSPO	NaN	NaN	NaN	NaN	0	NaN	NaN	NaN	NaN	0	NaN	NaN	NaN	NaN	0	NaN	NaN	NaN	NaN	0	21.4464	21.4464	NaN	NaN	1	23.6832	23.6832	NaN	NaN	1	NaN	NaN	NaN	NaN	0	NaN	NaN	NaN	NaN	0	NaN	NaN	NaN	NaN	0	NaN	NaN
P30566	Adenylosuccinate lyase	ADSL	26.5492	26.5492	0.517801	0.0195034	2	26.4917	26.4917	0.485916	0.0183422	2	26.5911	26.5911	0.0785617	0.00295444	2	27.3243	27.3243	0.219398	0.00802943	2	27.2188	26.9469	0.657893	0.0241706	3	27.3294	27.304	0.442553	0.0161933	3	NaN	NaN	NaN	NaN	0	27.0405	27.2587	0.431986	0.0159755	3	26.9412	26.9412	NaN	NaN	1	26.9154	26.8353
P30622	CAP-Gly domain-containing linker protein 1	CLIP1	30.3941	30.3941	2.21905	0.0730092	2	NaN	NaN	NaN	NaN	0	30.8751	30.8751	NaN	NaN	1	33.0281	33.0873	0.209482	0.00634254	3	29.2832	29.2832	3.81398	0.130244	2	32.313	32.313	NaN	NaN	1	NaN	NaN	NaN	NaN	0	NaN	NaN	NaN	NaN	0	30.3073	30.3073	NaN	NaN	1	NaN	NaN
P30626	Sorcin	SRI	NaN	NaN	NaN	NaN	0	28.3652	28.3652	NaN	NaN	1	27.846	27.846	NaN	NaN	1	28.727	28.727	NaN	NaN	1	28.5371	28.5371	NaN	NaN	1	27.6628	27.6628	NaN	NaN	1	27.1051	27.1051	NaN	NaN	1	27.6176	27.6176	NaN	NaN	1	28.001	28.001	0.33593	0.011997	2	NaN	NaN
P30740	Leukocyte elastase inhibitor	SERPINB1	27.491	27.5599	0.135138	0.00491572	3	27.1774	27.1774	0.378921	0.0139425	2	27.4192	27.3409	0.23954	0.00873619	3	27.0929	27.0929	0.0252989	0.000933784	2	27.2573	27.2573	0.0441915	0.00162127	2	27.4126	27.3743	0.218868	0.00798423	3	28.0684	28.0684	NaN	NaN	1	27.2442	27.2442	0.25015	0.00918177	2	27.2837	27.2289	0.148796	0.00545367	3	27.5599	27.4453
P30837	Aldehyde dehydrogenase X, mitochondrial	ALDH1B1	27.5862	27.5862	0.346287	0.0125529	2	27.5248	27.5248	0.293918	0.0106783	2	27.5924	27.6101	0.343045	0.0124326	3	27.1879	27.1879	NaN	NaN	1	27.2328	27.2328	0.161727	0.00593867	2	27.1695	27.1413	0.595662	0.0219239	3	27.2389	27.1988	0.401572	0.0147426	3	27.3498	27.3498	0.246015	0.00899511	2	27.6107	27.4578	0.48915	0.0177159	3	27.8311	27.317
P30876	DNA-directed RNA polymerase II subunit RPB2	POLR2B	NaN	NaN	NaN	NaN	0	NaN	NaN	NaN	NaN	0	NaN	NaN	NaN	NaN	0	28.0386	28.0386	NaN	NaN	1	NaN	NaN	NaN	NaN	0	NaN	NaN	NaN	NaN	0	NaN	NaN	NaN	NaN	0	25.8047	25.8047	NaN	NaN	1	27.2375	27.2375	NaN	NaN	1	NaN	NaN
P31040	Succinate dehydrogenase [ubiquinone] flavoprotein subunit, mitochondrial	SDHA	27.8239	27.8239	NaN	NaN	1	27.7977	27.7977	0.136753	0.00491957	2	27.4659	27.4659	0.00963106	0.000350656	2	24.8289	24.8289	NaN	NaN	1	24.6906	24.6906	NaN	NaN	1	25.3372	25.3372	1.02285	0.0403694	2	24.2278	24.2278	NaN	NaN	1	24.3566	24.3566	NaN	NaN	1	23.9112	23.9112	NaN	NaN	1	27.8239	27.8944
P31150	Rab GDP dissociation inhibitor alpha	GDI1	29.5492	29.3264	0.618961	0.0209468	3	29.2365	29.2365	0.266039	0.00909954	2	28.8219	28.8219	0.181915	0.0063117	2	29.5009	29.5009	0.680504	0.0230672	2	28.9296	28.9296	0.801455	0.0277036	2	29.1926	29.1926	0.391245	0.0134022	2	NaN	NaN	NaN	NaN	0	30.5096	30.5096	NaN	NaN	1	30.1329	29.9077	0.658825	0.021864	3	29.0725	29.4246
P31151	Protein S100-A7	S100A7	28.8971	28.8971	NaN	NaN	1	NaN	NaN	NaN	NaN	0	29.0896	29.0896	NaN	NaN	1	NaN	NaN	NaN	NaN	0	NaN	NaN	NaN	NaN	0	29.1841	29.1841	NaN	NaN	1	NaN	NaN	NaN	NaN	0	28.4315	28.4315	NaN	NaN	1	28.2051	28.2051	0.34803	0.0123393	2	NaN	NaN
P31153	S-adenosylmethionine synthase isoform type-2	MAT2A	NaN	NaN	NaN	NaN	0	NaN	NaN	NaN	NaN	0	NaN	NaN	NaN	NaN	0	NaN	NaN	NaN	NaN	0	21.5397	21.5397	NaN	NaN	1	27.092	27.092	NaN	NaN	1	NaN	NaN	NaN	NaN	0	NaN	NaN	NaN	NaN	0	26.9444	26.9444	NaN	NaN	1	NaN	NaN
P31323	cAMP-dependent protein kinase type II-beta regulatory subunit	PRKAR2B	23.4157	23.4157	NaN	NaN	1	23.4278	23.4278	NaN	NaN	1	NaN	NaN	NaN	NaN	0	NaN	NaN	NaN	NaN	0	23.2931	23.2931	NaN	NaN	1	NaN	NaN	NaN	NaN	0	NaN	NaN	NaN	NaN	0	NaN	NaN	NaN	NaN	0	NaN	NaN	NaN	NaN	0	NaN	23.4278
P31327	Carbamoyl-phosphate synthase [ammonia], mitochondrial	CPS1	29.3195	29.3195	NaN	NaN	1	28.0456	28.0456	NaN	NaN	1	NaN	NaN	NaN	NaN	0	NaN	NaN	NaN	NaN	0	NaN	NaN	NaN	NaN	0	NaN	NaN	NaN	NaN	0	NaN	NaN	NaN	NaN	0	NaN	NaN	NaN	NaN	0	25.4199	25.4199	NaN	NaN	1	29.3195	NaN
P31483	Nucleolysin TIA-1 isoform p40	TIA1	NaN	NaN	NaN	NaN	0	26.2996	26.2996	NaN	NaN	1	27.0696	27.0696	NaN	NaN	1	NaN	NaN	NaN	NaN	0	NaN	NaN	NaN	NaN	0	NaN	NaN	NaN	NaN	0	NaN	NaN	NaN	NaN	0	NaN	NaN	NaN	NaN	0	NaN	NaN	NaN	NaN	0	NaN	26.2996
P31689	DnaJ homolog subfamily A member 1	DNAJA1	28.0308	28.0308	0.331856	0.011839	2	27.531	27.3541	0.355587	0.0129158	3	27.5875	27.4968	0.297025	0.0107666	3	27.7319	27.7319	0.307466	0.0110871	2	27.7267	27.5598	0.333505	0.0120283	3	27.7648	28.0531	0.684056	0.0246375	3	27.7933	27.7933	0.0486354	0.0017499	2	27.907	27.8963	0.384616	0.013782	3	28.2649	28.0876	0.444368	0.0157216	3	28.2654	27.2987
P31930	Cytochrome b-c1 complex subunit 1, mitochondrial	UQCRC1	27.3761	27.3761	0.228515	0.00834728	2	27.6493	27.7628	0.217103	0.00785202	3	27.3109	27.1552	0.291919	0.0106887	3	27.5571	27.2489	0.660185	0.023957	3	27.1466	27.2942	0.353991	0.01304	3	27.7727	27.5455	0.509847	0.0183579	3	28.0201	27.5152	0.89703	0.0320138	3	27.3054	27.0282	0.541497	0.0198311	3	27.9192	27.8981	0.595234	0.0213199	3	27.5376	27.7628
P31937	3-hydroxyisobutyrate dehydrogenase, mitochondrial	HIBADH	NaN	NaN	NaN	NaN	0	NaN	NaN	NaN	NaN	0	NaN	NaN	NaN	NaN	0	29.2497	29.2497	NaN	NaN	1	NaN	NaN	NaN	NaN	0	NaN	NaN	NaN	NaN	0	28.3572	28.3572	NaN	NaN	1	NaN	NaN	NaN	NaN	0	NaN	NaN	NaN	NaN	0	NaN	NaN
P31939	Bifunctional purine biosynthesis protein PURH;Phosphoribosylaminoimidazolecarboxamide formyltransferase;IMP cyclohydrolase	ATIC	28.5535	27.9493	1.4112	0.049423	3	26.8385	26.1957	1.53972	0.05737	3	28.5359	28.0167	1.36949	0.047992	3	28.0708	28.0708	0.403985	0.0143917	2	28.5748	28.4307	0.730848	0.0255766	3	27.995	27.7872	1.79334	0.0640593	3	27.2818	27.2818	0.0131903	0.000483482	2	27.4292	27.1457	0.784921	0.0286162	3	27.2434	27.5182	0.889818	0.0326618	3	30.1663	25.7243
P31942	Heterogeneous nuclear ribonucleoprotein H3	HNRNPH3	29.1989	29.1989	NaN	NaN	1	29.3322	29.3322	0.0378971	0.001292	2	28.8852	28.8852	0.225552	0.00780857	2	28.9392	28.9392	NaN	NaN	1	29.3399	29.3399	NaN	NaN	1	28.3954	28.3954	NaN	NaN	1	28.8486	28.8486	0.149433	0.00517991	2	28.9344	28.9344	0.771438	0.0266616	2	29.2724	29.2724	NaN	NaN	1	29.1989	29.3054
P31943	Heterogeneous nuclear ribonucleoprotein H;Heterogeneous nuclear ribonucleoprotein H, N-terminally processed	HNRNPH1	28.9751	28.9132	1.46288	0.0504874	3	29.5564	29.4949	0.241697	0.00817747	3	30.1449	30.1473	0.0279961	0.00092872	3	29.2024	29.2851	0.542686	0.0185836	3	29.012	29.302	0.852699	0.0293913	3	28.8813	29.1821	1.40048	0.0484909	3	29.4807	29.5364	0.578436	0.0196208	3	28.6753	28.7676	0.755075	0.0263319	3	29.1192	29.482	0.802388	0.0275553	3	27.5442	29.8229
P31946	14-3-3 protein beta/alpha;14-3-3 protein beta/alpha, N-terminally processed	YWHAB	31.1644	31.1083	0.135147	0.00433658	3	30.5288	30.6181	0.369922	0.0121171	3	30.8868	30.9529	0.185241	0.00599743	3	30.4798	30.2982	0.968511	0.0317755	3	31.5216	31.2886	0.557842	0.0176971	3	31.2296	31.3634	0.333864	0.0106906	3	31.4493	31.4665	0.145298	0.00462007	3	31.0392	31.0405	0.373408	0.0120302	3	31.4881	31.587	0.325466	0.0103361	3	31.1083	30.8459
P31947	14-3-3 protein sigma	SFN	31.1812	31.1094	0.371012	0.0118986	3	30.7759	30.7953	0.0678632	0.00220508	3	31.0194	30.9548	0.180433	0.0058168	3	30.845	30.9773	0.499664	0.0161992	3	31.4349	31.4541	0.105539	0.00335738	3	31.1466	31.1962	0.180636	0.00579954	3	31.2825	31.1029	0.401442	0.0128328	3	31.1699	31.0945	0.194915	0.00625332	3	31.484	31.6766	0.477204	0.015157	3	30.8513	30.8319
P31948	Stress-induced-phosphoprotein 1	STIP1	30.3626	30.5806	0.513012	0.0168962	3	30.0511	29.9792	0.243048	0.00808782	3	30.2543	30.2441	0.227602	0.00752295	3	30.4472	30.5556	0.314185	0.010319	3	30.117	29.9858	0.231116	0.00767397	3	30.19	30.2469	0.435725	0.0144327	3	29.8887	29.7775	0.35137	0.011756	3	29.9648	29.9991	0.227287	0.00758512	3	29.532	29.4471	0.35775	0.012114	3	30.7306	30.322
P31949	Protein S100-A11;Protein S100-A11, N-terminally processed	S100A11	29.0426	29.099	0.156702	0.00539558	3	28.5201	28.9362	0.928867	0.0325689	3	29.4745	29.4745	0.0464789	0.00157692	2	28.7478	28.7553	0.274997	0.00956585	3	28.8724	28.8724	0.162806	0.0056388	2	28.2993	28.3549	0.136548	0.00482513	3	29.0461	28.9933	0.130018	0.00447627	3	28.8748	28.8164	0.2726	0.00944075	3	29.0531	29.0694	0.16051	0.00552472	3	29.099	29.1681
P32119	Peroxiredoxin-2	PRDX2	31.7282	32.188	0.861205	0.0271432	3	31.0166	31.0515	0.174753	0.00563419	3	31.2383	31.3735	0.424862	0.0136007	3	30.8899	30.8895	0.0239985	0.000776905	3	30.3871	30.4667	0.211543	0.00696162	3	31.2699	31.3438	0.382303	0.0122259	3	30.607	30.1753	0.846699	0.0276636	3	30.9533	31.2643	0.920816	0.0297485	3	30.2917	30.1643	1.44142	0.0475845	3	32.2619	31.0515
P32322	Pyrroline-5-carboxylate reductase 1, mitochondrial	PYCR1	29.0659	28.9894	0.15495	0.00533097	3	28.6163	28.6539	0.0737876	0.00257851	3	28.7023	28.7023	NaN	NaN	1	29.1321	29.1321	0.289842	0.00994922	2	29.4535	29.4535	0.425442	0.0144445	2	28.842	28.9059	0.162029	0.00561782	3	28.9462	28.9462	1.05748	0.0365326	2	29.517	29.6085	0.191779	0.00649724	3	29.0447	28.6723	0.740176	0.025484	3	28.9642	28.5313
P32929	Cystathionine gamma-lyase	CTH	NaN	NaN	NaN	NaN	0	NaN	NaN	NaN	NaN	0	27.2932	27.2932	NaN	NaN	1	NaN	NaN	NaN	NaN	0	NaN	NaN	NaN	NaN	0	NaN	NaN	NaN	NaN	0	NaN	NaN	NaN	NaN	0	25.8048	25.8048	NaN	NaN	1	26.3427	26.3427	NaN	NaN	1	NaN	NaN
P32969	60S ribosomal protein L9	RPL9	28.9402	28.9402	1.20287	0.041564	2	28.3853	28.7314	0.704654	0.0248246	3	28.6859	28.7992	0.198064	0.00690456	3	28.7198	28.6659	0.232179	0.00808427	3	28.8095	28.8095	0.440338	0.0152845	2	28.791	28.791	0.445865	0.0154863	2	29.5632	29.5632	0.532619	0.0180163	2	29.0614	28.8934	0.732106	0.0251917	3	27.8963	27.8963	NaN	NaN	1	29.7908	28.85
P33121	Long-chain-fatty-acid--CoA ligase 1	ACSL1	NaN	NaN	NaN	NaN	0	NaN	NaN	NaN	NaN	0	26.5254	26.5254	0.376027	0.0141761	2	NaN	NaN	NaN	NaN	0	26.2717	26.2717	NaN	NaN	1	25.8186	25.8186	NaN	NaN	1	NaN	NaN	NaN	NaN	0	NaN	NaN	NaN	NaN	0	NaN	NaN	NaN	NaN	0	NaN	NaN
P33176	Kinesin-1 heavy chain	KIF5B	28.1683	28.0486	0.47062	0.0167074	3	27.999	28.1996	0.454293	0.0162253	3	28.0799	28.0465	0.181918	0.00647856	3	28.2296	28.3188	0.663845	0.0235159	3	27.9482	27.9482	0.0717171	0.00256607	2	27.7355	27.7355	1.09433	0.039456	2	NaN	NaN	NaN	NaN	0	28.8013	28.8013	NaN	NaN	1	NaN	NaN	NaN	NaN	0	28.0486	28.1996
P33240	Cleavage stimulation factor subunit 2	CSTF2	27.3309	27.3309	NaN	NaN	1	26.9802	26.9802	NaN	NaN	1	26.8856	26.8856	NaN	NaN	1	27.6803	27.6803	NaN	NaN	1	27.4587	27.4587	NaN	NaN	1	27.8261	27.8261	0.164664	0.00591761	2	NaN	NaN	NaN	NaN	0	NaN	NaN	NaN	NaN	0	27.6982	27.6982	NaN	NaN	1	NaN	NaN
P33316	Deoxyuridine 5-triphosphate nucleotidohydrolase, mitochondrial	DUT	NaN	NaN	NaN	NaN	0	NaN	NaN	NaN	NaN	0	NaN	NaN	NaN	NaN	0	NaN	NaN	NaN	NaN	0	NaN	NaN	NaN	NaN	0	NaN	NaN	NaN	NaN	0	NaN	NaN	NaN	NaN	0	23.7004	23.7004	NaN	NaN	1	25.3173	25.3173	NaN	NaN	1	NaN	NaN
P33991	DNA replication licensing factor MCM4	MCM4	26.9448	26.9448	0.185561	0.0068867	2	NaN	NaN	NaN	NaN	0	27.2318	27.2318	NaN	NaN	1	27.4761	27.4761	NaN	NaN	1	27.435	27.4138	0.329883	0.0120242	3	27.3542	27.3542	0.0828641	0.0030293	2	27.1157	27.1157	NaN	NaN	1	27.1122	27.1122	0.264651	0.00976135	2	27.3198	27.3198	NaN	NaN	1	NaN	NaN
P33992	DNA replication licensing factor MCM5	MCM5	27.7144	27.7144	0.141359	0.00510055	2	26.6865	26.6865	0.81133	0.0304022	2	27.0639	27.0639	0.0839606	0.00310231	2	26.7172	26.7172	1.97393	0.0738824	2	26.0749	26.5017	1.96072	0.0751957	3	26.2434	26.2434	NaN	NaN	1	26.62	26.62	NaN	NaN	1	26.5584	26.5584	NaN	NaN	1	26.697	26.697	0.353961	0.0132585	2	27.6144	NaN
P33993	DNA replication licensing factor MCM7	MCM7	NaN	NaN	NaN	NaN	0	NaN	NaN	NaN	NaN	0	NaN	NaN	NaN	NaN	0	NaN	NaN	NaN	NaN	0	NaN	NaN	NaN	NaN	0	NaN	NaN	NaN	NaN	0	NaN	NaN	NaN	NaN	0	27.5051	27.5051	NaN	NaN	1	26.6102	26.6102	NaN	NaN	1	NaN	NaN
P34896	Serine hydroxymethyltransferase, cytosolic	SHMT1	NaN	NaN	NaN	NaN	0	26.5559	26.5559	NaN	NaN	1	NaN	NaN	NaN	NaN	0	27.439	27.439	NaN	NaN	1	NaN	NaN	NaN	NaN	0	NaN	NaN	NaN	NaN	0	26.5229	26.5229	0.455062	0.0171573	2	27.1751	27.1751	0.210071	0.00773027	2	NaN	NaN	NaN	NaN	0	NaN	NaN
P34897	Serine hydroxymethyltransferase, mitochondrial	SHMT2	28.9756	28.8194	0.314378	0.0108498	3	29.2349	29.248	0.0955452	0.00326819	3	29.373	29.3274	0.171086	0.00582461	3	29.3872	29.527	0.494095	0.0168133	3	28.9784	28.8848	0.293282	0.0101207	3	29.1349	29.1549	0.320808	0.0110111	3	29.472	29.4633	0.345145	0.011711	3	28.5909	28.5211	0.517998	0.0181176	3	28.8025	29.3848	1.12253	0.0389734	3	29.3374	29.248
P34913	Bifunctional epoxide hydrolase 2;Cytosolic epoxide hydrolase 2;Lipid-phosphate phosphatase	EPHX2	NaN	NaN	NaN	NaN	0	NaN	NaN	NaN	NaN	0	NaN	NaN	NaN	NaN	0	NaN	NaN	NaN	NaN	0	NaN	NaN	NaN	NaN	0	24.2398	24.2398	NaN	NaN	1	NaN	NaN	NaN	NaN	0	26.4349	26.4349	NaN	NaN	1	NaN	NaN	NaN	NaN	0	NaN	NaN
P34932	Heat shock 70 kDa protein 4	HSPA4	28.4966	28.5607	0.380548	0.0133541	3	28.4144	28.5253	0.268661	0.00945508	3	28.5013	28.4043	0.458249	0.0160782	3	27.5345	27.7674	0.950689	0.0345272	3	28.4261	28.2507	0.31017	0.0109115	3	27.8813	28.2499	0.756275	0.0271248	3	28.5967	28.5967	0.0225921	0.000790025	2	27.5535	27.8003	0.707712	0.025685	3	28.5364	28.3868	0.448324	0.0157106	3	28.0881	28.61
P35080	Profilin-2	PFN2	27.8928	27.7525	0.488576	0.0175162	3	27.0018	26.8715	0.294024	0.010889	3	27.1724	27.1326	0.136147	0.00501049	3	27.5275	27.5275	NaN	NaN	1	27.1724	27.1724	0.612233	0.0225315	2	28.0737	28.0737	NaN	NaN	1	27.0929	27.0929	0.507312	0.0187249	2	26.8093	26.8093	NaN	NaN	1	26.8794	26.8794	NaN	NaN	1	27.7525	26.8715
P35221	Catenin alpha-1	CTNNA1	27.8495	27.8495	NaN	NaN	1	27.2071	27.2071	0.434947	0.0159865	2	27.5464	27.0455	0.888283	0.0322468	3	26.6312	26.6312	NaN	NaN	1	27.2401	27.2401	0.45217	0.0165994	2	27.4898	27.4898	NaN	NaN	1	NaN	NaN	NaN	NaN	0	29.0238	29.0238	NaN	NaN	1	NaN	NaN	NaN	NaN	0	27.8495	NaN
P35222	Catenin beta-1	CTNNB1	27.6413	27.5201	0.98767	0.0357316	3	27.8243	27.8442	0.0589725	0.00211946	3	27.6044	27.0185	1.24036	0.0449336	3	27.5624	27.5222	0.657929	0.0238705	3	27.5791	27.6384	0.650836	0.0235988	3	27.824	27.7218	0.252796	0.00908552	3	26.4847	26.4847	0.711946	0.0268814	2	27.5148	27.5148	0.517762	0.0188176	2	27.1541	27.1541	0.538061	0.0198151	2	27.5201	27.8442
P35227	Polycomb group RING finger protein 2;Polycomb complex protein BMI-1	PCGF2	NaN	NaN	NaN	NaN	0	NaN	NaN	NaN	NaN	0	NaN	NaN	NaN	NaN	0	NaN	NaN	NaN	NaN	0	NaN	NaN	NaN	NaN	0	28.3601	28.3601	NaN	NaN	1	28.4357	28.4357	NaN	NaN	1	NaN	NaN	NaN	NaN	0	NaN	NaN	NaN	NaN	0	NaN	NaN
P35232	Prohibitin	PHB	28.6956	28.6762	0.164838	0.00574436	3	29.1085	29.1128	0.323283	0.0111061	3	28.7718	28.9142	0.802926	0.0279067	3	28.4593	28.1541	0.752731	0.0264494	3	29.2948	29.3137	0.577916	0.0197276	3	28.8083	28.6542	0.566434	0.0196622	3	28.4597	28.2848	0.383942	0.0134907	3	28.6097	28.9247	0.78041	0.0272778	3	28.6513	28.6513	0.438012	0.0152877	2	28.5413	28.7831
P35237	Serpin B6	SERPINB6	27.8171	27.8171	0.239907	0.00862443	2	28.0326	28.0326	NaN	NaN	1	27.7096	27.7096	0.21447	0.00773993	2	27.0887	27.0887	NaN	NaN	1	NaN	NaN	NaN	NaN	0	27.8393	27.8393	0.569425	0.020454	2	27.5309	27.5309	NaN	NaN	1	NaN	NaN	NaN	NaN	0	NaN	NaN	NaN	NaN	0	27.6475	28.0326
P35241	Radixin	RDX	30.2602	30.3633	0.181713	0.00600502	3	30.1354	30.1209	0.0618836	0.00205352	3	30.0617	30.0028	0.127684	0.0042474	3	30.2675	30.1587	0.241758	0.00798739	3	30.2866	30.3129	0.354191	0.0116947	3	30.3636	30.4185	0.266437	0.00877488	3	30.1775	30.2724	0.179326	0.00594238	3	30.4793	30.3835	0.220234	0.0072257	3	30.3632	30.3115	0.365121	0.0120251	3	30.3633	30.1209
P35244	Replication protein A 14 kDa subunit	RPA3	27.2424	27.2424	0.377489	0.0138566	2	27.5546	27.5546	NaN	NaN	1	27.5147	27.5147	0.00255444	9.28391e-05	2	NaN	NaN	NaN	NaN	0	28.1211	28.1211	NaN	NaN	1	NaN	NaN	NaN	NaN	0	NaN	NaN	NaN	NaN	0	NaN	NaN	NaN	NaN	0	27.2362	27.2362	NaN	NaN	1	26.9755	NaN
P35249	Replication factor C subunit 4	RFC4	26.7262	26.7262	NaN	NaN	1	NaN	NaN	NaN	NaN	0	27.4276	27.4276	NaN	NaN	1	NaN	NaN	NaN	NaN	0	NaN	NaN	NaN	NaN	0	27.2947	27.2947	NaN	NaN	1	NaN	NaN	NaN	NaN	0	NaN	NaN	NaN	NaN	0	NaN	NaN	NaN	NaN	0	26.7262	NaN
P35250	Replication factor C subunit 2	RFC2	NaN	NaN	NaN	NaN	0	NaN	NaN	NaN	NaN	0	NaN	NaN	NaN	NaN	0	NaN	NaN	NaN	NaN	0	25.6395	25.6395	NaN	NaN	1	29.8688	29.8688	NaN	NaN	1	NaN	NaN	NaN	NaN	0	NaN	NaN	NaN	NaN	0	NaN	NaN	NaN	NaN	0	NaN	NaN
P35268	60S ribosomal protein L22	RPL22	29.7017	29.8183	0.510795	0.0171975	3	29.4363	29.7468	0.802386	0.0272584	3	29.9907	30.0503	0.110088	0.00367074	3	28.9602	29.2116	0.784044	0.0270731	3	30.2706	29.8003	0.977439	0.03229	3	29.6877	29.5757	0.470258	0.0158402	3	29.3874	29.3874	NaN	NaN	1	28.2393	28.2393	NaN	NaN	1	29.2036	29.2036	NaN	NaN	1	30.1441	30.0371
P35270	Sepiapterin reductase	SPR	26.7128	26.7128	NaN	NaN	1	26.2531	26.2531	0.0158809	0.000604917	2	26.3983	26.3983	0.323427	0.0122518	2	NaN	NaN	NaN	NaN	0	26.4333	26.4333	NaN	NaN	1	NaN	NaN	NaN	NaN	0	NaN	NaN	NaN	NaN	0	26.1544	26.1544	NaN	NaN	1	26.9963	26.9963	NaN	NaN	1	26.7128	26.2643
P35542	Serum amyloid A-4 protein	SAA4	31.2964	31.593	1.15705	0.0369706	3	29.6272	29.5699	1.53838	0.0519246	3	31.3582	31.2359	0.696246	0.022203	3	31.1712	30.966	0.997615	0.0320044	3	31.6042	31.6042	NaN	NaN	1	29.3154	29.3154	1.24548	0.0424853	2	30.4167	29.704	1.97847	0.0650454	3	29.679	29.947	0.655181	0.0220756	3	31.5067	31.5067	0.944346	0.0299729	2	31.593	31.1935
P35573	Glycogen debranching enzyme;4-alpha-glucanotransferase;Amylo-alpha-1,6-glucosidase	AGL	28.818	28.818	NaN	NaN	1	NaN	NaN	NaN	NaN	0	31.9643	31.9643	NaN	NaN	1	NaN	NaN	NaN	NaN	0	NaN	NaN	NaN	NaN	0	NaN	NaN	NaN	NaN	0	NaN	NaN	NaN	NaN	0	NaN	NaN	NaN	NaN	0	NaN	NaN	NaN	NaN	0	NaN	NaN
P35579	Myosin-9	MYH9	31.2518	31.3757	0.332396	0.010636	3	31.1698	30.7682	0.814147	0.0261198	3	31.7054	31.622	0.250124	0.007889	3	30.8252	30.9971	2.10266	0.0682122	3	31.0449	30.9547	1.1154	0.0359286	3	29.6075	31.0637	2.6381	0.0891025	3	30.4269	30.1407	0.737135	0.0242264	3	29.6477	29.4238	0.640145	0.0215917	3	31.0288	31.209	0.328077	0.0105733	3	31.5045	32.1067
P35580	Myosin-10	MYH10	29.4914	29.4914	1.18597	0.0402143	2	31.0188	31.0188	NaN	NaN	1	29.9915	29.9915	NaN	NaN	1	30.4266	30.3267	0.502523	0.0165159	3	29.7274	29.7274	1.26287	0.0424818	2	31.6828	31.6828	NaN	NaN	1	31.0817	31.2058	0.529718	0.0170428	3	29.9965	30.1471	0.943497	0.0314535	3	29.647	29.7741	0.451763	0.0152381	3	NaN	31.0188
P35606	Coatomer subunit beta	COPB2	27.1054	27.4088	0.731116	0.0269731	3	26.7874	26.7777	0.183861	0.00686371	3	26.6688	26.6688	NaN	NaN	1	NaN	NaN	NaN	NaN	0	27.3311	27.3311	0.453638	0.0165979	2	27.4279	27.4279	0.208347	0.00759618	2	27.2239	27.2239	NaN	NaN	1	24.8008	24.8008	NaN	NaN	1	27.0885	27.0885	NaN	NaN	1	26.2714	26.9759
P35610	Sterol O-acyltransferase 1	SOAT1	21.9413	21.9413	NaN	NaN	1	NaN	NaN	NaN	NaN	0	NaN	NaN	NaN	NaN	0	NaN	NaN	NaN	NaN	0	NaN	NaN	NaN	NaN	0	NaN	NaN	NaN	NaN	0	NaN	NaN	NaN	NaN	0	NaN	NaN	NaN	NaN	0	NaN	NaN	NaN	NaN	0	21.9413	NaN
P35611	Alpha-adducin	ADD1	NaN	NaN	NaN	NaN	0	NaN	NaN	NaN	NaN	0	26.819	26.819	NaN	NaN	1	NaN	NaN	NaN	NaN	0	NaN	NaN	NaN	NaN	0	NaN	NaN	NaN	NaN	0	NaN	NaN	NaN	NaN	0	NaN	NaN	NaN	NaN	0	NaN	NaN	NaN	NaN	0	NaN	NaN
P35612	Beta-adducin	ADD2	NaN	NaN	NaN	NaN	0	25.91	25.91	NaN	NaN	1	NaN	NaN	NaN	NaN	0	NaN	NaN	NaN	NaN	0	NaN	NaN	NaN	NaN	0	NaN	NaN	NaN	NaN	0	NaN	NaN	NaN	NaN	0	NaN	NaN	NaN	NaN	0	NaN	NaN	NaN	NaN	0	NaN	NaN
P35613	Basigin	BSG	27.5366	27.5366	NaN	NaN	1	27.7769	27.4053	0.714053	0.0257067	3	28.6705	28.8623	0.343485	0.0119804	3	27.9193	27.9193	1.37366	0.0492013	2	28.4057	28.3129	0.165571	0.00582879	3	28.1511	28.1835	0.0969309	0.00344324	3	28.5427	28.5427	0.280063	0.00981206	2	28.2141	28.2141	NaN	NaN	1	28.2303	28.179	0.95383	0.0337875	3	27.5366	28.6001
P35637	RNA-binding protein FUS	FUS	30.0706	30.0499	0.0363716	0.00120954	3	30.1831	30.3401	0.410943	0.013615	3	30.176	30.2122	0.175285	0.00580875	3	30.2149	30.1834	0.162687	0.00538434	3	30.2034	30.2373	0.209353	0.00693147	3	30.2591	30.3066	0.874464	0.0288992	3	29.872	29.8976	0.358107	0.0119881	3	30.0117	29.9967	0.0750835	0.0025018	3	29.8664	29.7895	0.176043	0.00589435	3	30.0493	30.3401
P35658	Nuclear pore complex protein Nup214	NUP214	NaN	NaN	NaN	NaN	0	NaN	NaN	NaN	NaN	0	NaN	NaN	NaN	NaN	0	NaN	NaN	NaN	NaN	0	NaN	NaN	NaN	NaN	0	NaN	NaN	NaN	NaN	0	NaN	NaN	NaN	NaN	0	NaN	NaN	NaN	NaN	0	24.836	24.836	NaN	NaN	1	NaN	NaN
P35659	Protein DEK	DEK	27.6369	27.6369	NaN	NaN	1	28.4289	28.4289	0.300802	0.0105808	2	27.6883	27.6707	0.229419	0.00828578	3	27.798	27.798	0.210239	0.0075631	2	28.1295	28.1295	NaN	NaN	1	28.365	28.365	NaN	NaN	1	27.9402	27.9402	NaN	NaN	1	27.771	27.771	NaN	NaN	1	27.9865	27.9865	NaN	NaN	1	27.6369	28.6416
P35858	Insulin-like growth factor-binding protein complex acid labile subunit	IGFALS	28.5504	28.5504	NaN	NaN	1	28.5703	28.5703	0.0201172	0.000704131	2	28.0505	28.0505	NaN	NaN	1	28.7652	28.7652	0.525051	0.018253	2	28.2483	28.2483	NaN	NaN	1	27.8588	27.8588	0.506321	0.0181746	2	29.7891	29.7891	NaN	NaN	1	NaN	NaN	NaN	NaN	0	NaN	NaN	NaN	NaN	0	28.5504	NaN
P35914	Hydroxymethylglutaryl-CoA lyase, mitochondrial	HMGCL	24.99	24.99	NaN	NaN	1	NaN	NaN	NaN	NaN	0	24.9394	24.9394	NaN	NaN	1	NaN	NaN	NaN	NaN	0	25.1321	25.1321	NaN	NaN	1	24.2991	24.2991	NaN	NaN	1	28.6626	28.6626	NaN	NaN	1	NaN	NaN	NaN	NaN	0	NaN	NaN	NaN	NaN	0	NaN	NaN
P35998	26S protease regulatory subunit 7	PSMC2	27.5666	27.5504	0.143535	0.00520686	3	27.8599	27.938	0.319924	0.0114833	3	27.9007	27.6247	0.759227	0.0272118	3	28.2473	28.4057	0.368119	0.013032	3	28.0824	28.1563	0.210274	0.00748775	3	28.1852	27.7846	0.915068	0.0324662	3	28.6778	28.6083	0.372276	0.0129813	3	28.314	28.4157	0.263068	0.00929109	3	27.5391	27.5391	0.32218	0.011699	2	27.4318	28.1334
P36404	ADP-ribosylation factor-like protein 2	ARL2	27.4206	27.4206	NaN	NaN	1	NaN	NaN	NaN	NaN	0	NaN	NaN	NaN	NaN	0	NaN	NaN	NaN	NaN	0	NaN	NaN	NaN	NaN	0	NaN	NaN	NaN	NaN	0	NaN	NaN	NaN	NaN	0	NaN	NaN	NaN	NaN	0	NaN	NaN	NaN	NaN	0	NaN	NaN
P36405	ADP-ribosylation factor-like protein 3	ARL3	27.2111	27.2111	0.212881	0.00782334	2	27.1164	27.1164	0.125006	0.00460996	2	26.9724	27.0583	0.459046	0.0170191	3	NaN	NaN	NaN	NaN	0	NaN	NaN	NaN	NaN	0	26.9484	26.9505	0.00470733	0.000174679	3	26.314	26.314	0.159967	0.00607915	2	26.7725	26.7802	0.155746	0.00581738	3	26.9404	26.9404	NaN	NaN	1	27.3616	NaN
P36507	Dual specificity mitogen-activated protein kinase kinase 2	MAP2K2	NaN	NaN	NaN	NaN	0	NaN	NaN	NaN	NaN	0	26.3657	26.3657	0.0959829	0.00364044	2	NaN	NaN	NaN	NaN	0	NaN	NaN	NaN	NaN	0	NaN	NaN	NaN	NaN	0	NaN	NaN	NaN	NaN	0	NaN	NaN	NaN	NaN	0	NaN	NaN	NaN	NaN	0	NaN	NaN
P36542	ATP synthase subunit gamma, mitochondrial	ATP5C1	28.7028	28.7286	0.167726	0.00584354	3	28.7782	28.7782	NaN	NaN	1	28.232	28.232	0.263567	0.00933575	2	28.7074	28.7074	0.304172	0.0105956	2	28.4759	28.3298	0.341553	0.0119945	3	28.6059	28.4807	0.253789	0.00887189	3	28.5481	28.5552	0.0402446	0.00140971	3	27.9025	28.6368	1.67051	0.0598693	3	28.7487	28.5067	0.466847	0.0162389	3	28.8562	NaN
P36551	Oxygen-dependent coproporphyrinogen-III oxidase, mitochondrial	CPOX	28.921	28.8614	0.111571	0.0038578	3	29.0655	29.1655	0.373336	0.0128447	3	29.3235	29.3942	0.193601	0.00660226	3	28.9397	28.8945	0.0894237	0.00309	3	29.013	29.0585	0.528202	0.0182057	3	28.736	28.7495	0.215495	0.00749915	3	29.4158	29.4158	0.341162	0.0115979	2	29.2959	29.2959	0.133125	0.00454414	2	29.3489	29.3489	0.15673	0.00534023	2	29.0497	29.1655
P36578	60S ribosomal protein L4	RPL4	30.4045	30.3081	0.175416	0.00576941	3	30.3493	30.355	0.232691	0.0076671	3	30.452	30.475	0.0758393	0.00249045	3	30.4529	30.4007	0.159939	0.00525201	3	30.5032	30.4886	0.141583	0.00464159	3	29.7146	30.3074	1.04066	0.0350217	3	30.413	30.4086	0.416986	0.0137108	3	29.9876	30.1766	0.585364	0.0195202	3	30.4582	30.4494	0.101751	0.00334068	3	30.3081	30.5791
P36776	Lon protease homolog, mitochondrial	LONP1	NaN	NaN	NaN	NaN	0	27.7201	27.7201	NaN	NaN	1	28.0071	27.9622	0.182087	0.00650147	3	27.6874	27.6874	0.733204	0.0264815	2	28.8864	28.8864	NaN	NaN	1	28.0413	28.0413	0.21179	0.00755281	2	NaN	NaN	NaN	NaN	0	28.0707	28.0707	NaN	NaN	1	27.9685	27.9685	NaN	NaN	1	NaN	27.7201
P36871	Phosphoglucomutase-1	PGM1	28.3191	28.3191	1.27071	0.0448709	2	27.6457	27.9034	0.723719	0.0261783	3	27.3797	27.3656	0.287955	0.0105171	3	27.7243	27.7243	0.110959	0.00400223	2	27.5125	27.6533	0.309764	0.011259	3	27.0431	27.2762	0.521419	0.019281	3	27.1902	27.1902	0.0840496	0.00309117	2	27.7923	27.6572	0.355902	0.0128058	3	27.4937	27.4937	0.732145	0.0266296	2	29.2177	26.8284
P36873	Serine/threonine-protein phosphatase PP1-gamma catalytic subunit	PPP1CC	27.3212	27.3212	0.515741	0.018877	2	NaN	NaN	NaN	NaN	0	27.3375	27.4168	0.238379	0.00871986	3	27.5763	27.5763	NaN	NaN	1	26.0823	26.0823	0.389639	0.0149388	2	26.5213	26.5213	0.536577	0.020232	2	26.9284	26.9284	0.0836814	0.00310755	2	27.9781	27.9781	NaN	NaN	1	27.6281	27.6281	0.407005	0.0147316	2	NaN	NaN
P36915	Guanine nucleotide-binding protein-like 1	GNL1	NaN	NaN	NaN	NaN	0	NaN	NaN	NaN	NaN	0	24.944	24.944	NaN	NaN	1	NaN	NaN	NaN	NaN	0	NaN	NaN	NaN	NaN	0	NaN	NaN	NaN	NaN	0	NaN	NaN	NaN	NaN	0	NaN	NaN	NaN	NaN	0	NaN	NaN	NaN	NaN	0	NaN	NaN
P36952	Serpin B5	SERPINB5	27.3478	27.2904	0.210015	0.0076794	3	26.648	26.648	0.0250278	0.000939199	2	27.1627	27.0865	0.190444	0.00701124	3	27.4646	27.4646	NaN	NaN	1	27.143	27.143	0.00970659	0.000357609	2	27.3886	27.3886	0.452003	0.0165033	2	NaN	NaN	NaN	NaN	0	27.9589	27.9589	NaN	NaN	1	26.0239	26.0239	NaN	NaN	1	27.5806	26.6657
P36955	Pigment epithelium-derived factor	SERPINF1	30.7382	30.7078	0.0822469	0.00267572	3	29.971	29.9134	0.620026	0.0206875	3	30.4723	30.5495	0.148888	0.00488601	3	31.5872	31.3858	0.580647	0.0183823	3	29.2697	28.5409	1.70323	0.0581907	3	31.0157	31.0371	0.570948	0.0184083	3	30.2214	30.2922	0.791192	0.0261798	3	29.5625	29.3296	0.739706	0.0250218	3	30.3969	31.2411	1.81137	0.0595906	3	30.8313	29.9134
P36957	Dihydrolipoyllysine-residue succinyltransferase component of 2-oxoglutarate dehydrogenase complex, mitochondrial	DLST	27.2429	27.2429	0.959636	0.0352252	2	28.1935	28.1446	0.28917	0.0102566	3	28.0124	28.0124	0.942323	0.0336395	2	26.6299	26.6299	0.436956	0.0164085	2	26.958	26.958	1.12827	0.0418528	2	28.4302	28.4302	NaN	NaN	1	27.3024	27.3024	NaN	NaN	1	28.4464	29.0323	1.10877	0.0389774	3	27.757	27.757	0.469606	0.0169185	2	26.5643	28.1446
P37108	Signal recognition particle 14 kDa protein	SRP14	NaN	NaN	NaN	NaN	0	NaN	NaN	NaN	NaN	0	NaN	NaN	NaN	NaN	0	NaN	NaN	NaN	NaN	0	25.0263	25.0263	NaN	NaN	1	27.1929	27.1929	NaN	NaN	1	NaN	NaN	NaN	NaN	0	NaN	NaN	NaN	NaN	0	NaN	NaN	NaN	NaN	0	NaN	NaN
P37198	Nuclear pore glycoprotein p62	NUP62	29.6706	29.6706	NaN	NaN	1	28.3761	28.3761	NaN	NaN	1	27.5328	27.5328	NaN	NaN	1	28.7618	28.7618	0.59785	0.0207863	2	28.5243	28.5243	NaN	NaN	1	27.8073	27.8073	NaN	NaN	1	27.5928	27.5928	NaN	NaN	1	NaN	NaN	NaN	NaN	0	28.135	28.135	0.104122	0.0037008	2	NaN	NaN
P37235	Hippocalcin-like protein 1;Neuron-specific calcium-binding protein hippocalcin	HPCAL1	NaN	NaN	NaN	NaN	0	NaN	NaN	NaN	NaN	0	NaN	NaN	NaN	NaN	0	26.2023	26.2023	0.583565	0.0222715	2	27.4028	27.4028	1.74761	0.0637749	2	26.9983	26.9983	NaN	NaN	1	NaN	NaN	NaN	NaN	0	NaN	NaN	NaN	NaN	0	NaN	NaN	NaN	NaN	0	NaN	NaN
P37802	Transgelin-2	TAGLN2	29.0324	29.0324	NaN	NaN	1	28.4488	28.2817	0.368467	0.0129519	3	29.33	29.5133	0.412756	0.0140729	3	29.1142	29.1142	1.01372	0.0348189	2	27.9799	28.1946	0.753132	0.0269169	3	28.8355	28.8355	0.359186	0.0124564	2	28.5368	28.5763	0.309083	0.0108311	3	29.0776	29.0776	0.959137	0.0329854	2	28.6367	28.6367	1.15922	0.0404803	2	NaN	28.8712
P37837	Transaldolase	TALDO1	30.1507	30.1159	0.441009	0.0146268	3	30.4321	30.2888	0.49297	0.016199	3	30.2997	30.3049	0.231001	0.00762387	3	30.4288	30.4094	0.329697	0.010835	3	30.2352	30.1198	0.254455	0.00841586	3	30.6513	30.7425	0.356455	0.0116294	3	29.8825	29.737	0.291781	0.00976428	3	29.4961	29.7091	0.547473	0.0185608	3	29.3734	29.6612	0.58354	0.0198662	3	30.6081	30.0267
P38117	Electron transfer flavoprotein subunit beta	ETFB	27.9646	27.9646	NaN	NaN	1	27.2947	27.2947	0.477569	0.0174967	2	26.9886	26.9886	NaN	NaN	1	26.9189	26.9189	0.463846	0.0172312	2	NaN	NaN	NaN	NaN	0	28.0099	28.0099	NaN	NaN	1	26.9139	26.9139	0.44976	0.016711	2	27.4375	27.4375	0.349026	0.0127208	2	27.4306	27.2797	0.464318	0.016927	3	27.9646	26.957
P38159	RNA-binding motif protein, X chromosome;RNA-binding motif protein, X chromosome, N-terminally processed	RBMX	30.3602	30.2406	0.497857	0.0163984	3	29.9317	30.2503	0.582973	0.0194768	3	29.8201	29.7073	0.26486	0.00888193	3	30.2024	30.4485	0.468498	0.0155119	3	29.8377	30.3393	1.19502	0.0400505	3	29.8044	29.9489	1.00224	0.0336272	3	29.6681	29.5695	0.199098	0.00671085	3	29.357	29.357	0.249934	0.00851363	2	29.6646	29.6646	0.46202	0.0155748	2	29.933	30.2503
P38571	Lysosomal acid lipase/cholesteryl ester hydrolase	LIPA	NaN	NaN	NaN	NaN	0	NaN	NaN	NaN	NaN	0	NaN	NaN	NaN	NaN	0	NaN	NaN	NaN	NaN	0	NaN	NaN	NaN	NaN	0	25.085	25.085	NaN	NaN	1	NaN	NaN	NaN	NaN	0	NaN	NaN	NaN	NaN	0	NaN	NaN	NaN	NaN	0	NaN	NaN
P38606	V-type proton ATPase catalytic subunit A	ATP6V1A	27.3932	27.3932	NaN	NaN	1	27.3469	27.3992	0.106798	0.00390529	3	27.3007	27.252	0.138746	0.00508212	3	27.6025	27.6025	0.496803	0.0179984	2	28.2212	28.2212	NaN	NaN	1	27.1396	26.651	0.89432	0.0329526	3	NaN	NaN	NaN	NaN	0	27.5055	27.5055	0.840728	0.0305658	2	27.8588	27.8588	NaN	NaN	1	NaN	27.3992
P38646	Stress-70 protein, mitochondrial	HSPA9	30.2775	30.4361	0.281649	0.00930226	3	30.3516	30.3654	0.198654	0.00654511	3	30.5807	30.5596	0.178197	0.00582712	3	30.1631	30.0753	0.471111	0.0156188	3	30.485	30.2789	0.38389	0.0125927	3	30.0488	29.9146	0.411751	0.0137027	3	30.5963	30.6444	0.103835	0.00339371	3	30.7584	30.9231	0.299584	0.00973992	3	30.488	30.403	0.169906	0.00557288	3	30.444	30.1464
P38919	Eukaryotic initiation factor 4A-III;Eukaryotic initiation factor 4A-III, N-terminally processed	EIF4A3	31.3451	31.3664	0.0435883	0.00139059	3	30.4973	31.2122	1.32118	0.043321	3	31.1487	31.1542	0.0299539	0.000961644	3	31.814	32.0472	0.639046	0.020087	3	31.401	31.1705	0.552859	0.0176064	3	31.0648	31.1127	0.494976	0.0159337	3	30.5224	30.6884	0.47085	0.0154264	3	31.2543	31.2732	0.274847	0.00879388	3	31.1022	31.4989	0.744349	0.0239323	3	31.3664	31.2122
P39019	40S ribosomal protein S19	RPS19	29.6692	29.5961	0.168037	0.0056637	3	29.5348	29.7326	0.688191	0.023301	3	29.8254	29.8501	0.141385	0.00474043	3	30.1896	30.2858	0.426283	0.0141202	3	30.0081	29.8104	0.367299	0.01224	3	29.9262	30.1561	0.48859	0.0163265	3	30.1909	29.8657	0.849235	0.0281288	3	30.1923	30.154	0.189184	0.00626596	3	30.3579	30.4166	0.357336	0.0117708	3	29.8614	30.1024
P39023	60S ribosomal protein L3	RPL3	30.0661	29.8997	0.773648	0.0257316	3	30.005	30.0077	0.311339	0.0103762	3	30.3591	30.4001	0.254785	0.00839238	3	30.9134	30.702	0.660978	0.0213816	3	30.6284	30.4285	0.471102	0.0153812	3	30.9361	30.7764	0.622777	0.0201311	3	31.3012	31.3289	0.0890576	0.00284518	3	31.2062	31.382	0.316903	0.0101551	3	30.9937	31.0458	0.581029	0.0187467	3	29.3892	30.3149
P39060	Collagen alpha-1(XVIII) chain;Endostatin	COL18A1	25.1961	25.1961	NaN	NaN	1	NaN	NaN	NaN	NaN	0	25.821	25.821	NaN	NaN	1	NaN	NaN	NaN	NaN	0	NaN	NaN	NaN	NaN	0	NaN	NaN	NaN	NaN	0	NaN	NaN	NaN	NaN	0	NaN	NaN	NaN	NaN	0	NaN	NaN	NaN	NaN	0	NaN	NaN
P39656	Dolichyl-diphosphooligosaccharide--protein glycosyltransferase 48 kDa subunit	DDOST	30.3018	30.1785	0.357703	0.0118047	3	30.7062	30.7062	1.41404	0.0460507	2	29.8782	29.8937	0.36759	0.012303	3	31.3978	31.3978	NaN	NaN	1	31.4275	31.4275	NaN	NaN	1	NaN	NaN	NaN	NaN	0	31.8709	31.8709	NaN	NaN	1	32.1561	32.1561	NaN	NaN	1	31.6022	31.6022	0.287107	0.00908504	2	30.0221	29.7063
P39687	Acidic leucine-rich nuclear phosphoprotein 32 family member A	ANP32A	29.6768	29.6768	0.00960409	0.000323622	2	28.7898	28.7898	0.102132	0.0035475	2	29.1825	29.1462	0.27914	0.00956532	3	29.0961	29.0961	0.576275	0.0198059	2	29.4617	29.4105	0.251525	0.00853735	3	28.9104	28.9104	NaN	NaN	1	28.9366	28.9366	0.552016	0.0190767	2	29.355	28.7334	1.25647	0.0428025	3	29.7793	29.3738	0.708419	0.0237889	3	29.6836	NaN
P39748	Flap endonuclease 1	FEN1	27.8407	27.8407	0.614169	0.0220601	2	27.5303	27.5303	NaN	NaN	1	27.7169	27.7325	0.294483	0.0106247	3	NaN	NaN	NaN	NaN	0	28.0477	28.0477	1.06163	0.0378508	2	NaN	NaN	NaN	NaN	0	27.4985	27.4985	NaN	NaN	1	30.3153	30.3153	NaN	NaN	1	28.0012	28.0012	NaN	NaN	1	27.4064	27.5303
P40121	Macrophage-capping protein	CAPG	27.1735	27.1897	0.466057	0.0171511	3	26.9218	26.9218	0.297368	0.0110456	2	27.4442	27.4656	0.444822	0.0162083	3	27.0682	27.1322	0.299945	0.0110811	3	27.1338	26.9053	0.542817	0.0200052	3	26.0466	26.0466	0.58449	0.0224401	2	27.6588	27.6588	0.167105	0.00604166	2	27.9312	27.9312	0.528132	0.0189083	2	27.4238	27.4238	0.0279896	0.00102063	2	27.6313	26.7115
P40123	Adenylyl cyclase-associated protein 2	CAP2	NaN	NaN	NaN	NaN	0	NaN	NaN	NaN	NaN	0	28.1275	28.1275	NaN	NaN	1	29.7784	29.7784	NaN	NaN	1	28.3474	28.3474	NaN	NaN	1	28.9734	28.9734	NaN	NaN	1	28.8045	28.8045	NaN	NaN	1	NaN	NaN	NaN	NaN	0	29.3157	29.3157	NaN	NaN	1	NaN	NaN
P40222	Alpha-taxilin	TXLNA	26.7876	26.7876	0.74769	0.0279118	2	26.562	26.562	0.581575	0.021895	2	26.9478	26.9478	0.22806	0.00846301	2	NaN	NaN	NaN	NaN	0	26.3322	26.3322	NaN	NaN	1	25.5647	25.5647	NaN	NaN	1	NaN	NaN	NaN	NaN	0	NaN	NaN	NaN	NaN	0	NaN	NaN	NaN	NaN	0	27.3163	NaN
P40227	T-complex protein 1 subunit zeta	CCT6A	30.6051	30.6207	0.336504	0.010995	3	30.67	30.8143	0.435639	0.0142041	3	30.5195	30.5043	0.0765834	0.00250933	3	30.5422	30.6055	0.312804	0.0102417	3	30.5922	30.5754	0.102935	0.00336475	3	30.5863	30.6598	0.19825	0.00648165	3	30.2528	30.2525	0.11365	0.00375667	3	30.3976	30.2966	0.275586	0.00906606	3	30.2519	30.443	0.41526	0.0137267	3	30.6207	31.0152
P40259	B-cell antigen receptor complex-associated protein beta chain	CD79B	NaN	NaN	NaN	NaN	0	26.014	26.014	NaN	NaN	1	NaN	NaN	NaN	NaN	0	NaN	NaN	NaN	NaN	0	NaN	NaN	NaN	NaN	0	22.8553	22.8553	NaN	NaN	1	NaN	NaN	NaN	NaN	0	NaN	NaN	NaN	NaN	0	NaN	NaN	NaN	NaN	0	NaN	NaN
P40429	60S ribosomal protein L13a	RPL13A	30.5349	30.5355	0.149527	0.00489692	3	30.278	30.2418	0.0945645	0.00312321	3	30.3472	30.3562	0.0301567	0.000993724	3	30.0198	30.012	0.26227	0.00873659	3	30.1362	30.1189	0.152245	0.00505191	3	30.4899	30.3331	0.478059	0.0156792	3	30.7996	30.5905	0.376107	0.0122114	3	30.7604	30.6746	0.188176	0.00611748	3	30.4911	30.7295	0.425977	0.0139705	3	30.6842	30.3853
P40616	ADP-ribosylation factor-like protein 1	ARL1	NaN	NaN	NaN	NaN	0	NaN	NaN	NaN	NaN	0	NaN	NaN	NaN	NaN	0	28.2874	28.2874	NaN	NaN	1	NaN	NaN	NaN	NaN	0	NaN	NaN	NaN	NaN	0	28.0651	27.8319	0.543595	0.0193691	3	28.4156	28.5854	0.326253	0.0114815	3	28.1374	28.1374	0.751594	0.0267116	2	NaN	NaN
P40763	Signal transducer and activator of transcription 3	STAT3	NaN	NaN	NaN	NaN	0	NaN	NaN	NaN	NaN	0	NaN	NaN	NaN	NaN	0	NaN	NaN	NaN	NaN	0	NaN	NaN	NaN	NaN	0	NaN	NaN	NaN	NaN	0	NaN	NaN	NaN	NaN	0	24.4749	24.4749	NaN	NaN	1	23.8588	23.8588	NaN	NaN	1	NaN	NaN
P40925	Malate dehydrogenase, cytoplasmic	MDH1	28.1088	28.1088	0.441959	0.0157232	2	28.9362	28.924	0.524213	0.0181161	3	28.3531	28.4557	0.275065	0.00970141	3	28.5517	28.68	0.354081	0.0124014	3	28.4238	28.4238	1.05444	0.0370971	2	28.8277	28.8277	0.590576	0.0204864	2	28.5041	28.5041	NaN	NaN	1	28.8408	28.8458	0.161781	0.00560945	3	28.4306	28.4306	NaN	NaN	1	27.7963	28.4182
P40926	Malate dehydrogenase, mitochondrial	MDH2	30.818	30.7838	0.40548	0.0131573	3	30.9289	31.084	0.323512	0.0104599	3	29.8105	30.5429	2.22058	0.0744898	3	30.741	30.7635	0.309713	0.0100749	3	30.8504	30.8845	0.295534	0.00957958	3	30.9721	30.8994	0.415573	0.0134176	3	31.1793	31.3053	0.324179	0.0103972	3	31.0561	30.9971	0.226444	0.00729145	3	30.8993	31.0543	0.470038	0.0152119	3	31.2395	30.5571
P40937	Replication factor C subunit 5	RFC5	28.0443	28.0443	NaN	NaN	1	NaN	NaN	NaN	NaN	0	NaN	NaN	NaN	NaN	0	NaN	NaN	NaN	NaN	0	NaN	NaN	NaN	NaN	0	NaN	NaN	NaN	NaN	0	NaN	NaN	NaN	NaN	0	22.2606	22.2606	NaN	NaN	1	NaN	NaN	NaN	NaN	0	NaN	NaN
P40938	Replication factor C subunit 3	RFC3	NaN	NaN	NaN	NaN	0	NaN	NaN	NaN	NaN	0	26.3329	26.3329	NaN	NaN	1	NaN	NaN	NaN	NaN	0	26.2957	26.2957	NaN	NaN	1	NaN	NaN	NaN	NaN	0	NaN	NaN	NaN	NaN	0	NaN	NaN	NaN	NaN	0	NaN	NaN	NaN	NaN	0	NaN	NaN
P40939	Trifunctional enzyme subunit alpha, mitochondrial;Long-chain enoyl-CoA hydratase;Long chain 3-hydroxyacyl-CoA dehydrogenase	HADHA	28.4577	28.4591	0.0658846	0.00231518	3	28.5302	28.5575	0.233336	0.00817856	3	28.4724	28.6627	0.647635	0.022746	3	28.7446	28.7446	0.704973	0.0245254	2	28.1301	28.3891	0.829126	0.0294747	3	29.2427	29.2431	0.344186	0.01177	3	27.9274	27.9274	0.249086	0.00891906	2	27.8645	27.8645	0.00935053	0.000335571	2	28.341	28.341	NaN	NaN	1	28.4591	28.2844
P41091	Eukaryotic translation initiation factor 2 subunit 3;Putative eukaryotic translation initiation factor 2 subunit 3-like protein	EIF2S3	NaN	NaN	NaN	NaN	0	NaN	NaN	NaN	NaN	0	27.8919	27.8919	NaN	NaN	1	NaN	NaN	NaN	NaN	0	28.4154	28.4154	0.152314	0.00536027	2	27.9576	27.9576	NaN	NaN	1	27.1209	27.1209	0.238702	0.0088014	2	28.2726	28.2726	NaN	NaN	1	27.7782	27.7782	NaN	NaN	1	NaN	NaN
P41227	N-alpha-acetyltransferase 10	NAA10	27.6263	27.6263	0.320311	0.0115944	2	27.4115	27.4115	NaN	NaN	1	27.8637	27.9171	0.378912	0.0135988	3	27.3083	27.3083	NaN	NaN	1	27.4905	27.4905	0.100258	0.00364701	2	27.9662	27.9662	0.364099	0.0130192	2	27.847	27.847	0.13866	0.00497935	2	28.0451	28.0919	0.141317	0.00503893	3	28.2678	28.277	0.41863	0.0148094	3	27.3998	27.4115
P41250	Glycine--tRNA ligase	GARS	28.7797	28.6371	0.463313	0.0160986	3	29.0411	29.0604	0.108323	0.00373	3	29.0414	29.0698	0.202442	0.0069708	3	29.254	29.2732	0.107891	0.00368808	3	28.308	29.0063	1.31907	0.046597	3	29.1974	29.1002	0.388531	0.013307	3	28.4516	28.5043	0.818424	0.0287655	3	28.9871	28.9883	0.524291	0.018087	3	28.9226	28.7824	0.586555	0.0202802	3	29.2975	28.9244
P41252	Isoleucine--tRNA ligase, cytoplasmic	IARS	28.4235	28.5357	0.209782	0.00738057	3	28.2768	28.5527	0.622196	0.0220037	3	28.6518	28.7508	0.234944	0.00819996	3	27.6074	27.6074	0.716595	0.0259566	2	27.9641	27.9446	0.422863	0.0151216	3	28.1466	28.113	0.132862	0.00472035	3	28.5084	28.5084	NaN	NaN	1	NaN	NaN	NaN	NaN	0	28.4319	28.4319	NaN	NaN	1	28.5533	27.5644
P41567	Eukaryotic translation initiation factor 1;Eukaryotic translation initiation factor 1b	EIF1	28.7217	28.7217	NaN	NaN	1	NaN	NaN	NaN	NaN	0	28.4315	28.4315	NaN	NaN	1	27.3946	27.3946	NaN	NaN	1	26.9556	26.9556	NaN	NaN	1	NaN	NaN	NaN	NaN	0	NaN	NaN	NaN	NaN	0	27.8341	27.8341	NaN	NaN	1	NaN	NaN	NaN	NaN	0	NaN	NaN
P41743	Protein kinase C iota type	PRKCI	NaN	NaN	NaN	NaN	0	NaN	NaN	NaN	NaN	0	NaN	NaN	NaN	NaN	0	NaN	NaN	NaN	NaN	0	NaN	NaN	NaN	NaN	0	NaN	NaN	NaN	NaN	0	26.295	26.295	NaN	NaN	1	NaN	NaN	NaN	NaN	0	NaN	NaN	NaN	NaN	0	NaN	NaN
P42025	Beta-centractin	ACTR1B	28.3361	28.3361	0.888071	0.0313406	2	29.2875	29.2875	0.900456	0.0307454	2	29.2989	29.2989	0.0799091	0.00272737	2	30.1369	30.1369	NaN	NaN	1	28.4269	28.4269	0.0412419	0.0014508	2	28.199	28.199	NaN	NaN	1	28.0892	28.0892	1.33255	0.04744	2	NaN	NaN	NaN	NaN	0	29.8777	29.8777	NaN	NaN	1	NaN	28.6508
P42126	Enoyl-CoA delta isomerase 1, mitochondrial	ECI1	28.0467	28.0467	NaN	NaN	1	28.5399	28.4475	0.642036	0.0224961	3	27.8566	27.7325	0.554007	0.0198878	3	28.2749	28.2035	0.135929	0.00480743	3	28.1107	28.1107	0.171804	0.0061117	2	27.8046	27.4662	0.696336	0.0250439	3	28.5479	28.5479	NaN	NaN	1	28.5991	28.1905	0.843551	0.0294957	3	28.4975	28.4975	0.48448	0.0170008	2	NaN	27.9492
P42166	Lamina-associated polypeptide 2, isoform alpha;Thymopoietin;Thymopentin	TMPO	28.5247	28.5247	NaN	NaN	1	28.6618	28.6618	0.198847	0.0069377	2	28.3026	28.2161	0.278851	0.00985251	3	29.2822	29.2822	NaN	NaN	1	28.6281	28.6281	1.08892	0.0380369	2	29.2615	29.2615	NaN	NaN	1	NaN	NaN	NaN	NaN	0	24.8454	24.8454	NaN	NaN	1	29.4835	29.4835	NaN	NaN	1	NaN	28.8024
P42167	Lamina-associated polypeptide 2, isoforms beta/gamma;Thymopoietin;Thymopentin	TMPO	28.2135	28.2135	0.0373603	0.0013242	2	28.3771	28.3771	0.198848	0.00700736	2	28.1209	28.1105	0.178561	0.00634978	3	28.5953	28.5953	0.568827	0.0198924	2	28.2739	28.2739	1.18725	0.0419912	2	28.9768	28.9768	NaN	NaN	1	NaN	NaN	NaN	NaN	0	NaN	NaN	NaN	NaN	0	NaN	NaN	NaN	NaN	0	28.1871	28.5177
P42224	Signal transducer and activator of transcription 1-alpha/beta	STAT1	26.6156	26.55	0.338403	0.0127145	3	26.9638	26.9638	NaN	NaN	1	26.796	26.796	NaN	NaN	1	27.5649	27.5649	NaN	NaN	1	26.5365	26.5365	NaN	NaN	1	NaN	NaN	NaN	NaN	0	NaN	NaN	NaN	NaN	0	26.5361	26.5361	NaN	NaN	1	28.1358	28.1358	NaN	NaN	1	26.3149	NaN
P42285	Superkiller viralicidic activity 2-like 2	SKIV2L2	NaN	NaN	NaN	NaN	0	NaN	NaN	NaN	NaN	0	26.1589	26.1589	0.44851	0.0171456	2	NaN	NaN	NaN	NaN	0	29.1212	29.1212	NaN	NaN	1	26.1349	26.1349	NaN	NaN	1	25.852	25.852	NaN	NaN	1	NaN	NaN	NaN	NaN	0	NaN	NaN	NaN	NaN	0	NaN	NaN
P42566	Epidermal growth factor receptor substrate 15	EPS15	NaN	NaN	NaN	NaN	0	NaN	NaN	NaN	NaN	0	25.8844	25.8844	NaN	NaN	1	NaN	NaN	NaN	NaN	0	NaN	NaN	NaN	NaN	0	26.1593	26.1593	NaN	NaN	1	NaN	NaN	NaN	NaN	0	25.4339	25.4339	1.03481	0.0406862	2	27.0974	27.0974	NaN	NaN	1	NaN	NaN
P42677	40S ribosomal protein S27	RPS27	27.8659	27.8269	0.503826	0.0180804	3	28.3012	28.1872	0.21369	0.00755054	3	28.2281	28.2281	0.445552	0.015784	2	NaN	NaN	NaN	NaN	0	28.4678	28.4282	0.358497	0.0125931	3	NaN	NaN	NaN	NaN	0	27.6031	27.6031	0.713086	0.0258335	2	NaN	NaN	NaN	NaN	0	NaN	NaN	NaN	NaN	0	27.8269	28.1688
P42704	Leucine-rich PPR motif-containing protein, mitochondrial	LRPPRC	29.7947	29.7798	0.0284107	0.00095355	3	29.953	29.9523	0.232557	0.00776407	3	29.8694	29.8714	0.00734887	0.000246033	3	30.03	30.0741	0.10035	0.00334165	3	29.8283	29.8436	0.246166	0.00825275	3	29.9051	30.0279	0.289348	0.00967554	3	29.8019	29.8178	0.227167	0.00762256	3	29.6406	29.7363	0.182114	0.00614407	3	29.8909	29.9452	0.285835	0.00956261	3	29.7768	30.1859
P42765	3-ketoacyl-CoA thiolase, mitochondrial	ACAA2	26.6314	26.7057	0.411764	0.0154616	3	28.3509	28.3509	0.438312	0.0154603	2	27.1306	27.1306	0.281951	0.0103924	2	NaN	NaN	NaN	NaN	0	27.6435	27.6435	NaN	NaN	1	25.3646	25.3646	NaN	NaN	1	NaN	NaN	NaN	NaN	0	NaN	NaN	NaN	NaN	0	NaN	NaN	NaN	NaN	0	26.1875	NaN
P42766	60S ribosomal protein L35	RPL35	29.9848	29.8401	0.318378	0.010618	3	29.7896	29.5663	0.457197	0.0153476	3	29.6355	29.5579	0.431632	0.0145647	3	29.3595	29.123	0.447119	0.0152291	3	30.0003	29.9936	0.297847	0.00992814	3	29.9325	29.8785	0.477212	0.0159429	3	29.439	29.439	0.235827	0.00801071	2	29.9465	29.9704	0.0628588	0.00209904	3	29.9986	30.3088	0.602916	0.0200982	3	29.7645	29.4869
P43034	Platelet-activating factor acetylhydrolase IB subunit alpha	PAFAH1B1	27.6819	27.6819	0.430865	0.0155649	2	28.0473	28.0251	0.0635099	0.00226439	3	29.1301	29.1301	1.51923	0.0521535	2	27.124	27.124	NaN	NaN	1	28.1046	28.1046	0.718478	0.0255644	2	28.642	28.642	NaN	NaN	1	29.5458	29.5458	NaN	NaN	1	28.5449	28.6519	0.539191	0.0188893	3	28.5444	28.5444	0.214009	0.0074974	2	NaN	28.1189
P43243	Matrin-3	MATR3	29.2798	29.2798	0.400998	0.0136954	2	29.392	29.1971	0.624979	0.0212636	3	29.0373	29.0687	0.185131	0.00637562	3	29.1353	29.1353	0.289091	0.00992236	2	29.1832	29.377	0.544036	0.0186421	3	28.9446	28.9446	0.657798	0.0227261	2	28.3644	28.3006	0.270624	0.00954097	3	28.8202	28.8202	0.157199	0.00545446	2	28.7916	28.7916	0.28097	0.00975878	2	NaN	29.1971
P43246	DNA mismatch repair protein Msh2	MSH2	27.4996	27.4996	0.306729	0.011154	2	27.1462	27.1462	0.235394	0.00867133	2	NaN	NaN	NaN	NaN	0	27.2195	27.2195	0.791229	0.0290685	2	NaN	NaN	NaN	NaN	0	26.9335	26.9335	NaN	NaN	1	NaN	NaN	NaN	NaN	0	27.2785	27.1673	0.306131	0.0112224	3	27.7773	27.7773	0.288189	0.010375	2	NaN	26.9798
P43304	Glycerol-3-phosphate dehydrogenase, mitochondrial	GPD2	27.6377	27.8995	0.797904	0.0288701	3	27.5348	27.5348	1.86961	0.0678998	2	29.1504	29.1504	NaN	NaN	1	27.325	27.325	0.0767963	0.00281048	2	27.6933	27.6933	0.320286	0.0115655	2	27.0322	27.0322	NaN	NaN	1	27.9503	27.9503	0.476235	0.0170387	2	28.1104	28.1104	0.986405	0.0350904	2	27.507	27.507	NaN	NaN	1	28.2718	26.2128
P43307	Translocon-associated protein subunit alpha	SSR1	27.401	27.401	NaN	NaN	1	NaN	NaN	NaN	NaN	0	NaN	NaN	NaN	NaN	0	27.6834	27.6834	0.52396	0.0189268	2	28.3221	28.3221	0.235128	0.00830193	2	28.35	28.1871	0.336256	0.0118609	3	27.5552	27.5552	0.32237	0.0116991	2	27.8613	27.8613	0.158785	0.00569913	2	28.4863	28.4863	NaN	NaN	1	NaN	NaN
P43487	Ran-specific GTPase-activating protein	RANBP1	30.2356	30.3961	0.477717	0.0157998	3	29.7714	29.608	0.524128	0.0176051	3	30.0595	30.0595	0.278117	0.00925219	2	29.9237	29.9034	0.15019	0.0050191	3	29.8367	30.2321	1.11372	0.0373274	3	29.7874	30.1763	0.775578	0.0260371	3	29.7679	29.768	0.318579	0.0107021	3	29.467	30.0466	1.00744	0.0341887	3	29.8104	29.8715	0.242033	0.00811909	3	29.6983	30.3577
P43490	Nicotinamide phosphoribosyltransferase	NAMPT	27.9991	27.9991	0.106083	0.00378881	2	27.4579	27.4579	0.521429	0.0189901	2	28.5202	28.3809	0.698405	0.0244881	3	28.0497	28.0497	0.0316486	0.0011283	2	28.2221	28.5943	0.887104	0.0314329	3	28.8864	28.8864	1.53314	0.0530747	2	27.1311	27.1311	0.806105	0.0297115	2	26.8108	26.8108	1.03444	0.0385828	2	28.7868	28.7868	NaN	NaN	1	27.9241	27.8266
P43652	Afamin	AFM	28.4614	28.6585	1.4255	0.0500856	3	29.6625	29.7493	0.287276	0.00968481	3	28.4691	28.3785	0.324908	0.0114127	3	30.7298	30.0826	1.21001	0.0393757	3	29.825	29.825	2.08065	0.0697619	2	28.68	28.68	0.831588	0.0289954	2	29.7385	30.2893	2.51183	0.0844637	3	28.6564	28.3306	0.701044	0.0244638	3	30.8323	30.8323	0.883201	0.0286453	2	29.7781	29.8964
P43686	26S protease regulatory subunit 6B	PSMC4	28.5158	28.5158	0.775131	0.0271825	2	27.9166	27.8288	0.178057	0.00637818	3	28.1827	27.9605	1.23217	0.0437208	3	28.2492	28.2492	0.0736187	0.00260604	2	27.3925	27.4715	0.513857	0.018759	3	27.2979	27.2896	0.476043	0.0174388	3	27.506	27.506	1.3659	0.0496582	2	28.0953	28.2326	1.56061	0.0555471	3	28.1039	28.1039	NaN	NaN	1	27.9677	27.8288
P43897	Elongation factor Ts, mitochondrial	TSFM	26.3534	26.3534	NaN	NaN	1	NaN	NaN	NaN	NaN	0	NaN	NaN	NaN	NaN	0	NaN	NaN	NaN	NaN	0	26.3924	26.3924	NaN	NaN	1	NaN	NaN	NaN	NaN	0	24.1686	24.1686	NaN	NaN	1	NaN	NaN	NaN	NaN	0	25.9174	25.9174	NaN	NaN	1	NaN	NaN
P45877	Peptidyl-prolyl cis-trans isomerase C	PPIC	25.2008	25.2008	NaN	NaN	1	24.8034	24.8034	NaN	NaN	1	NaN	NaN	NaN	NaN	0	NaN	NaN	NaN	NaN	0	NaN	NaN	NaN	NaN	0	24.8127	24.8127	0.218333	0.00879925	2	NaN	NaN	NaN	NaN	0	NaN	NaN	NaN	NaN	0	NaN	NaN	NaN	NaN	0	NaN	NaN
P45880	Voltage-dependent anion-selective channel protein 2	VDAC2	30.064	30.1366	0.169824	0.00564875	3	29.8428	29.8573	0.0289645	0.000970567	3	29.8548	29.9435	0.170027	0.00569515	3	29.9826	30.0625	0.178602	0.00595686	3	29.8811	29.9043	0.136284	0.00456086	3	30.0133	30.0246	0.296068	0.00986458	3	29.8229	29.6088	0.449289	0.0150653	3	29.4762	29.6784	0.384135	0.013032	3	29.9423	29.9488	0.0567435	0.0018951	3	30.1854	29.8573
P45954	Short/branched chain specific acyl-CoA dehydrogenase, mitochondrial	ACADSB	26.9956	26.7549	0.55812	0.0206745	3	26.6559	26.6559	0.349916	0.0131271	2	26.8537	26.7436	0.308835	0.0115007	3	NaN	NaN	NaN	NaN	0	26.3774	26.3774	NaN	NaN	1	26.3793	26.3793	0.893411	0.0338678	2	27.1419	27.1419	NaN	NaN	1	NaN	NaN	NaN	NaN	0	NaN	NaN	NaN	NaN	0	26.7549	NaN
P45973	Chromobox protein homolog 5	CBX5	27.62	27.62	0.633301	0.0229291	2	27.8185	27.8185	0.0938803	0.00337475	2	27.6535	27.8383	0.506311	0.0183092	3	NaN	NaN	NaN	NaN	0	27.6678	27.6678	0.655047	0.0236754	2	27.8883	27.8883	0.395912	0.0141964	2	27.7015	27.7015	NaN	NaN	1	27.5219	27.5219	NaN	NaN	1	NaN	NaN	NaN	NaN	0	27.1722	27.8848
P45974	Ubiquitin carboxyl-terminal hydrolase 5	USP5	NaN	NaN	NaN	NaN	0	NaN	NaN	NaN	NaN	0	26.3522	26.3522	NaN	NaN	1	NaN	NaN	NaN	NaN	0	NaN	NaN	NaN	NaN	0	25.9309	25.9309	NaN	NaN	1	NaN	NaN	NaN	NaN	0	26.179	26.179	NaN	NaN	1	27.2769	27.2769	NaN	NaN	1	NaN	NaN
P46060	Ran GTPase-activating protein 1	RANGAP1	27.7015	27.7593	0.368642	0.0133076	3	27.951	27.6351	0.649292	0.0232296	3	28.0826	27.9949	0.180199	0.00641675	3	26.9136	26.9136	NaN	NaN	1	27.6243	27.7994	1.08573	0.0393035	3	27.103	26.9973	0.550463	0.0203101	3	NaN	NaN	NaN	NaN	0	26.944	27.124	0.818722	0.030386	3	27.4901	27.4901	NaN	NaN	1	28.0378	27.6351
P46063	ATP-dependent DNA helicase Q1	RECQL	NaN	NaN	NaN	NaN	0	26.3785	26.3785	NaN	NaN	1	NaN	NaN	NaN	NaN	0	NaN	NaN	NaN	NaN	0	NaN	NaN	NaN	NaN	0	NaN	NaN	NaN	NaN	0	27.7327	27.7327	NaN	NaN	1	27.598	27.598	NaN	NaN	1	NaN	NaN	NaN	NaN	0	NaN	26.3785
P46087	Probable 28S rRNA (cytosine(4447)-C(5))-methyltransferase	NOP2	27.5859	27.5859	NaN	NaN	1	26.9506	26.9506	NaN	NaN	1	NaN	NaN	NaN	NaN	0	NaN	NaN	NaN	NaN	0	27.9866	27.9866	NaN	NaN	1	NaN	NaN	NaN	NaN	0	NaN	NaN	NaN	NaN	0	NaN	NaN	NaN	NaN	0	NaN	NaN	NaN	NaN	0	27.5859	NaN
P46109	Crk-like protein	CRKL	26.2787	26.2787	NaN	NaN	1	26.329	26.329	NaN	NaN	1	26.3237	26.2126	0.273201	0.0103785	3	26.47	26.47	NaN	NaN	1	26.5218	26.5218	0.36668	0.0138256	2	26.3109	26.3109	0.222384	0.00845218	2	NaN	NaN	NaN	NaN	0	27.1308	27.1308	NaN	NaN	1	26.3719	26.3719	NaN	NaN	1	NaN	NaN
P46379	Large proline-rich protein BAG6	BAG6	NaN	NaN	NaN	NaN	0	NaN	NaN	NaN	NaN	0	30.2468	30.2468	NaN	NaN	1	25.5771	25.5771	NaN	NaN	1	NaN	NaN	NaN	NaN	0	NaN	NaN	NaN	NaN	0	NaN	NaN	NaN	NaN	0	NaN	NaN	NaN	NaN	0	NaN	NaN	NaN	NaN	0	NaN	NaN
P46459	Vesicle-fusing ATPase	NSF	29.4126	29.4323	0.081914	0.002785	3	29.4045	29.3655	0.196471	0.00668168	3	29.13	29.3596	0.541156	0.0185773	3	29.9607	30.0007	0.460813	0.0153806	3	29.2711	29.2459	0.500008	0.017082	3	29.54	29.1244	0.726401	0.0245904	3	28.6273	28.6088	0.210235	0.00734387	3	28.6017	28.2341	1.29498	0.0452762	3	29.4829	29.1463	0.608286	0.0206319	3	29.4323	29.3655
P46776	60S ribosomal protein L27a	RPL27A	28.6069	28.5017	0.305319	0.0106729	3	28.9479	28.9066	0.258643	0.00893477	3	28.2709	28.2954	0.0691608	0.00244636	3	28.2674	28.0877	0.701316	0.02481	3	28.3336	28.5392	0.407739	0.0143906	3	28.3728	28.2649	0.227903	0.00803245	3	28.1614	27.9932	0.296134	0.0105156	3	28.4438	28.433	0.481762	0.0169373	3	28.1635	28.3988	0.524255	0.0186147	3	28.5017	28.7124
P46777	60S ribosomal protein L5	RPL5	29.2127	29.0544	0.610631	0.0209029	3	29.6528	29.5186	0.400366	0.0135018	3	29.2147	29.1952	0.34069	0.0116616	3	29.4261	29.5187	0.614745	0.0208912	3	30.1272	30.1272	0.244463	0.00811434	2	29.9441	29.9564	0.0407535	0.00136098	3	28.9862	29.4581	0.993401	0.0342716	3	29.8538	29.6466	0.364434	0.0122073	3	29.8852	29.9822	0.247274	0.00827415	3	28.6968	29.3367
P46778	60S ribosomal protein L21	RPL21	29.2311	29.2329	0.186595	0.00638343	3	29.5194	29.5666	0.233016	0.00789365	3	29.2633	29.1588	0.442135	0.0151089	3	29.6981	29.3284	0.683499	0.0230149	3	30.0139	30.0139	0.111827	0.00372586	2	29.506	29.3287	0.470662	0.0159514	3	29.3397	29.3087	0.120093	0.00409318	3	29.2586	29.2722	0.0335868	0.00114793	3	29.4363	29.4363	0.644194	0.0218843	2	29.4168	29.7253
P46779	60S ribosomal protein L28	RPL28	27.8926	28.1822	0.61645	0.0221008	3	27.9093	28.0801	0.614587	0.0220209	3	28.1629	28.3299	0.375342	0.0133275	3	28.2557	28.2557	NaN	NaN	1	26.6745	26.6745	NaN	NaN	1	28.3877	28.3877	0.296971	0.0104613	2	28.4104	28.4104	0.636659	0.0224093	2	28.9552	28.9552	0.105737	0.00365173	2	28.5964	28.5964	0.201138	0.0070337	2	28.3109	28.4204
P46781	40S ribosomal protein S9	RPS9	28.2078	28.2078	0.175557	0.00622371	2	27.9498	27.9498	0.0853632	0.00305416	2	28.3757	28.3757	0.254804	0.00897966	2	28.6669	28.6772	0.253879	0.00885617	3	28.6682	28.6313	0.373216	0.0130185	3	29.0682	29.0682	0.5825	0.0200391	2	27.568	27.568	0.103625	0.00375887	2	28.5044	28.5258	0.477568	0.0167542	3	28.0142	28.0064	0.370436	0.0132232	3	28.332	27.8894
P46782	40S ribosomal protein S5;40S ribosomal protein S5, N-terminally processed	RPS5	27.2705	27.2513	0.0904423	0.00331649	3	26.8686	26.8686	0.12098	0.00450264	2	26.6274	26.6274	1.28231	0.0481577	2	26.8185	26.8185	NaN	NaN	1	26.1377	26.1193	0.531458	0.020333	3	26.638	26.338	1.06613	0.0400228	3	26.8152	26.8152	0.277415	0.0103454	2	25.7277	25.7277	1.08516	0.0421785	2	NaN	NaN	NaN	NaN	0	27.1911	26.7831
P46783	40S ribosomal protein S10	RPS10	29.3396	29.169	0.654181	0.0222969	3	29.3652	29.2921	0.132155	0.00450039	3	28.6701	28.6134	0.381168	0.0132949	3	29.5579	29.529	0.642107	0.0217237	3	29.0378	29.0447	0.474035	0.0163248	3	29.5005	29.7357	0.544076	0.0184429	3	28.5472	28.6431	0.385836	0.0135157	3	29.2728	29.5792	0.846697	0.0289243	3	29.3577	29.1945	0.427148	0.0145498	3	28.7876	29.2858
P46821	Microtubule-associated protein 1B;MAP1B heavy chain;MAP1 light chain LC1	MAP1B	27.2784	27.2784	NaN	NaN	1	NaN	NaN	NaN	NaN	0	NaN	NaN	NaN	NaN	0	NaN	NaN	NaN	NaN	0	NaN	NaN	NaN	NaN	0	NaN	NaN	NaN	NaN	0	NaN	NaN	NaN	NaN	0	NaN	NaN	NaN	NaN	0	NaN	NaN	NaN	NaN	0	NaN	NaN
P46926	Glucosamine-6-phosphate isomerase 1	GNPDA1	NaN	NaN	NaN	NaN	0	NaN	NaN	NaN	NaN	0	26.3686	26.3686	NaN	NaN	1	NaN	NaN	NaN	NaN	0	27.3588	27.3588	NaN	NaN	1	NaN	NaN	NaN	NaN	0	NaN	NaN	NaN	NaN	0	26.94	26.94	0.128988	0.00478799	2	NaN	NaN	NaN	NaN	0	NaN	NaN
P46940	Ras GTPase-activating-like protein IQGAP1	IQGAP1	28.0571	27.9798	0.1415	0.00504327	3	27.7208	27.5968	0.551174	0.0198831	3	28.4505	28.5628	0.221627	0.00778991	3	27.7077	27.6059	0.527567	0.0190404	3	28.1377	28.1377	0.51603	0.0183395	2	27.7262	27.8906	0.556513	0.0200717	3	27.8973	27.8973	0.441068	0.0158104	2	27.893	27.9448	0.346867	0.0124356	3	28.0065	28.0065	0.150058	0.00535795	2	27.9711	28.3234
P46976	Glycogenin-1	GYG1	NaN	NaN	NaN	NaN	0	NaN	NaN	NaN	NaN	0	NaN	NaN	NaN	NaN	0	NaN	NaN	NaN	NaN	0	27.3322	27.3322	NaN	NaN	1	NaN	NaN	NaN	NaN	0	NaN	NaN	NaN	NaN	0	NaN	NaN	NaN	NaN	0	26.0523	26.0523	NaN	NaN	1	NaN	NaN
P46977	Dolichyl-diphosphooligosaccharide--protein glycosyltransferase subunit STT3A	STT3A	27.2796	27.2796	NaN	NaN	1	27.5643	27.468	0.632357	0.0229412	3	27.8078	27.8078	0.353905	0.0127268	2	NaN	NaN	NaN	NaN	0	27.2203	27.2203	0.192057	0.00705568	2	27.189	27.189	0.246691	0.00907317	2	NaN	NaN	NaN	NaN	0	NaN	NaN	NaN	NaN	0	NaN	NaN	NaN	NaN	0	NaN	28.2392
P47755	F-actin-capping protein subunit alpha-2	CAPZA2	27.7162	27.7162	0.368117	0.0132816	2	26.5596	26.5596	NaN	NaN	1	27.957	27.9738	0.18079	0.00646674	3	26.4946	26.4946	0.590367	0.0222826	2	27.1478	27.1478	NaN	NaN	1	26.6911	26.6911	NaN	NaN	1	26.6583	26.6583	0.280668	0.0105284	2	27.1781	27.1781	0.780576	0.0287207	2	27.0604	27.0604	0.174216	0.00643803	2	27.4559	NaN
P47756	F-actin-capping protein subunit beta	CAPZB	27.1788	27.1788	0.184204	0.00677749	2	28.5938	28.5938	0.876973	0.0306701	2	26.7689	27.003	0.573569	0.0214267	3	27.2197	27.2197	0.418642	0.0153801	2	27.8665	27.8665	0.805315	0.028899	2	27.3499	27.3499	NaN	NaN	1	27.1455	27.1455	0.622395	0.0229281	2	27.7235	28.1207	1.05146	0.0379268	3	27.053	27.053	NaN	NaN	1	27.309	27.9737
P47813	Eukaryotic translation initiation factor 1A, X-chromosomal;Eukaryotic translation initiation factor 1A, Y-chromosomal	EIF1AX	26.5533	26.5533	0.206536	0.00777815	2	26.9958	27.1354	0.352432	0.0130551	3	27.1678	27.0634	0.804969	0.0296295	3	26.8781	26.8781	NaN	NaN	1	26.8635	26.8635	0.308043	0.011467	2	NaN	NaN	NaN	NaN	0	NaN	NaN	NaN	NaN	0	NaN	NaN	NaN	NaN	0	27.3627	27.3627	NaN	NaN	1	NaN	27.257
P47895	Aldehyde dehydrogenase family 1 member A3	ALDH1A3	28.8262	29.2547	0.785677	0.0272557	3	28.0602	28.0602	0.157126	0.00559961	2	29.2868	28.4409	1.52785	0.0521686	3	28.7962	28.7962	NaN	NaN	1	28.8261	28.8261	NaN	NaN	1	28.2814	27.9724	0.550251	0.0194563	3	29.1729	29.1729	0.154941	0.00531114	2	29.5735	29.3241	0.89454	0.030248	3	29.2178	29.2178	0.0262079	0.000896986	2	29.3044	27.9491
P47897	Glutamine--tRNA ligase	QARS	28.8936	28.8936	0.996253	0.0344801	2	NaN	NaN	NaN	NaN	0	28.7544	28.7544	0.676173	0.0235154	2	NaN	NaN	NaN	NaN	0	27.4527	27.5738	0.23564	0.0085835	3	27.7951	27.7951	1.40775	0.0506475	2	NaN	NaN	NaN	NaN	0	26.6252	26.6252	NaN	NaN	1	NaN	NaN	NaN	NaN	0	29.5981	NaN
P47914	60S ribosomal protein L29	RPL29	28.6858	28.5458	0.258703	0.0090185	3	29.072	29.2165	0.259458	0.00892468	3	29.1662	29.0734	0.297905	0.0102141	3	28.4627	28.4627	0.142154	0.00499441	2	29.0447	29.1376	0.195878	0.00674399	3	28.5539	28.8585	0.623179	0.0218247	3	28.5612	28.5521	0.07442	0.00260564	3	29.2075	29.1979	0.0684294	0.00234287	3	28.8572	28.8937	0.327897	0.0113628	3	28.5272	29.2165
P48047	ATP synthase subunit O, mitochondrial	ATP5O	29.4453	29.6067	0.38511	0.0130788	3	29.3531	29.3531	0.255189	0.00869375	2	29.0622	29.0918	0.359038	0.0123541	3	30.2721	30.3057	0.301889	0.00997251	3	29.4345	29.4002	0.489324	0.0166242	3	29.9907	30.014	0.389388	0.0129836	3	29.2501	29.0096	0.6814	0.0232956	3	29.6191	30.0376	0.798904	0.0269726	3	29.9292	29.8731	0.22768	0.00760729	3	29.6067	NaN
P48059	LIM and senescent cell antigen-like-containing domain protein 1	LIMS1	NaN	NaN	NaN	NaN	0	NaN	NaN	NaN	NaN	0	NaN	NaN	NaN	NaN	0	NaN	NaN	NaN	NaN	0	27.9117	27.9117	NaN	NaN	1	NaN	NaN	NaN	NaN	0	NaN	NaN	NaN	NaN	0	NaN	NaN	NaN	NaN	0	NaN	NaN	NaN	NaN	0	NaN	NaN
P48147	Prolyl endopeptidase	PREP	26.5319	26.5319	NaN	NaN	1	26.2549	26.2549	0.314293	0.0119708	2	27.2602	27.2602	NaN	NaN	1	NaN	NaN	NaN	NaN	0	26.6006	26.6006	NaN	NaN	1	26.1548	26.1548	NaN	NaN	1	26.7373	26.7373	0.113922	0.00426078	2	26.6944	26.6944	0.73907	0.0276863	2	26.0646	26.0646	0.374391	0.014364	2	NaN	26.4771
P48163	NADP-dependent malic enzyme	ME1	28.8876	28.8876	NaN	NaN	1	27.7359	27.7359	NaN	NaN	1	NaN	NaN	NaN	NaN	0	27.4211	27.4878	0.635542	0.0231771	3	NaN	NaN	NaN	NaN	0	26.92	26.92	NaN	NaN	1	26.3794	26.3794	NaN	NaN	1	NaN	NaN	NaN	NaN	0	NaN	NaN	NaN	NaN	0	28.8876	NaN
P48444	Coatomer subunit delta	ARCN1	26.6842	26.6842	1.03448	0.0387673	2	25.5145	26.0924	1.01157	0.0396468	3	26.1736	26.1736	0.348132	0.0133009	2	26.2029	26.2029	NaN	NaN	1	26.1936	26.1936	0.545446	0.0208236	2	26.0812	26.0812	NaN	NaN	1	26.2992	26.5415	0.533883	0.0203003	3	26.6663	26.7307	0.189339	0.0071003	3	26.3355	26.52	0.550155	0.0208903	3	27.4157	26.1046
P48506	Glutamate--cysteine ligase catalytic subunit	GCLC	26.7225	26.7225	0.0188858	0.00070674	2	26.515	26.515	0.0545751	0.00205827	2	26.3106	26.3069	0.243443	0.00925267	3	26.1842	26.1842	0.754615	0.0288195	2	26.2279	26.2279	0.465317	0.0177413	2	26.4155	26.4155	NaN	NaN	1	NaN	NaN	NaN	NaN	0	NaN	NaN	NaN	NaN	0	NaN	NaN	NaN	NaN	0	26.7091	26.5536
P48556	26S proteasome non-ATPase regulatory subunit 8	PSMD8	28.2296	28.2296	0.255574	0.00905341	2	27.6639	27.6639	0.067582	0.00244297	2	27.7337	27.7337	0.192235	0.00693148	2	27.9459	27.8085	0.723392	0.0258854	3	28.5078	28.5002	0.333585	0.0117015	3	28.0058	28.0058	0.140468	0.00501569	2	27.7474	27.7474	0.00271628	9.78931e-05	2	28.142	28.142	0.0442185	0.00157126	2	27.6129	27.6129	NaN	NaN	1	28.0489	27.6161
P48634	Protein PRRC2A	PRRC2A	27.7538	27.7538	NaN	NaN	1	NaN	NaN	NaN	NaN	0	NaN	NaN	NaN	NaN	0	NaN	NaN	NaN	NaN	0	27.9267	27.9267	NaN	NaN	1	NaN	NaN	NaN	NaN	0	NaN	NaN	NaN	NaN	0	NaN	NaN	NaN	NaN	0	NaN	NaN	NaN	NaN	0	NaN	NaN
P48637	Glutathione synthetase	GSS	25.8368	25.8368	NaN	NaN	1	NaN	NaN	NaN	NaN	0	26.5504	26.5504	1.00609	0.0378934	2	26.8917	26.8917	0.129607	0.0048196	2	26.937	26.937	NaN	NaN	1	NaN	NaN	NaN	NaN	0	NaN	NaN	NaN	NaN	0	28.3812	28.3812	NaN	NaN	1	28.1217	28.1217	NaN	NaN	1	25.8368	NaN
P48643	T-complex protein 1 subunit epsilon	CCT5	29.5006	29.4942	0.0171296	0.000580651	3	29.004	28.9312	0.324146	0.0111759	3	29.5353	29.5824	0.162592	0.00550501	3	28.8469	28.9185	0.556718	0.0192991	3	28.8119	29.3202	1.07499	0.0373107	3	29.1212	29.1157	0.248463	0.00853204	3	27.4015	26.9036	1.26385	0.0461236	3	28.4268	28.4457	0.428532	0.0150749	3	28.1656	27.7271	0.860504	0.0305516	3	29.4877	29.3584
P48681	Nestin	NES	NaN	NaN	NaN	NaN	0	25.9487	25.9487	NaN	NaN	1	NaN	NaN	NaN	NaN	0	NaN	NaN	NaN	NaN	0	NaN	NaN	NaN	NaN	0	NaN	NaN	NaN	NaN	0	27.8247	27.8247	NaN	NaN	1	27.7046	27.7046	NaN	NaN	1	NaN	NaN	NaN	NaN	0	NaN	25.9487
P48723	Heat shock 70 kDa protein 13	HSPA13	24.3041	24.3041	0.637196	0.0262176	2	24.2689	24.2689	NaN	NaN	1	25.2332	25.201	0.277888	0.0110128	3	25.0882	25.0882	NaN	NaN	1	NaN	NaN	NaN	NaN	0	25.6394	25.6394	0.799795	0.031194	2	NaN	NaN	NaN	NaN	0	NaN	NaN	NaN	NaN	0	NaN	NaN	NaN	NaN	0	23.8536	24.2689
P48729	Casein kinase I isoform alpha	CSNK1A1	25.7469	25.7469	0.892365	0.0346591	2	27.7011	27.7011	NaN	NaN	1	NaN	NaN	NaN	NaN	0	NaN	NaN	NaN	NaN	0	28.3315	28.3315	NaN	NaN	1	27.8077	27.8077	0.333545	0.0119947	2	NaN	NaN	NaN	NaN	0	26.0901	26.0901	NaN	NaN	1	26.7081	26.7081	NaN	NaN	1	NaN	NaN
P48735	Isocitrate dehydrogenase [NADP], mitochondrial	IDH2	27.3455	27.7114	0.791598	0.028948	3	27.2848	27.0933	0.345132	0.0126492	3	27.3945	27.2517	0.278916	0.0101815	3	27.5708	27.8539	0.581287	0.0210834	3	27.8004	27.905	0.429569	0.0154519	3	27.6515	27.6515	0.260442	0.00941874	2	27.851	27.8969	0.23816	0.0085512	3	27.3748	27.952	1.11981	0.0409064	3	28.1717	28.0672	0.218819	0.00776733	3	26.4371	27.6832
P48739	Phosphatidylinositol transfer protein beta isoform	PITPNB	27.5156	27.5156	NaN	NaN	1	NaN	NaN	NaN	NaN	0	28.7441	28.7441	NaN	NaN	1	29.6432	29.6432	NaN	NaN	1	27.9589	27.9589	0.306186	0.0109513	2	NaN	NaN	NaN	NaN	0	NaN	NaN	NaN	NaN	0	NaN	NaN	NaN	NaN	0	26.191	26.191	NaN	NaN	1	27.5156	NaN
P48740	Mannan-binding lectin serine protease 1;Mannan-binding lectin serine protease 1 heavy chain;Mannan-binding lectin serine protease 1 light chain	MASP1	29.3701	29.3701	0.0556837	0.00189593	2	29.6063	29.3176	0.802465	0.0271046	3	29.1181	29.0471	0.430101	0.0147709	3	29.4518	29.5148	0.459541	0.0156032	3	28.858	29.1806	0.756634	0.0262192	3	29.3533	29.4273	0.228593	0.00778765	3	30.0585	30.0585	0.312886	0.0104092	2	29.2952	29.1427	0.486998	0.0166238	3	29.2318	29.2318	1.09849	0.0375788	2	29.3307	30.5131
P49006	MARCKS-related protein	MARCKSL1	26.7544	26.7544	NaN	NaN	1	25.787	25.787	0.157693	0.00611519	2	26.7852	26.7852	NaN	NaN	1	25.1489	25.1489	NaN	NaN	1	26.8102	26.8102	1.97183	0.0735478	2	25.0986	25.0986	1.09595	0.0436658	2	NaN	NaN	NaN	NaN	0	NaN	NaN	NaN	NaN	0	25.4507	25.4507	NaN	NaN	1	26.7544	25.6755
P49023	Paxillin	PXN	NaN	NaN	NaN	NaN	0	NaN	NaN	NaN	NaN	0	25.2661	25.2661	NaN	NaN	1	NaN	NaN	NaN	NaN	0	NaN	NaN	NaN	NaN	0	NaN	NaN	NaN	NaN	0	NaN	NaN	NaN	NaN	0	NaN	NaN	NaN	NaN	0	NaN	NaN	NaN	NaN	0	NaN	NaN
P49189	4-trimethylaminobutyraldehyde dehydrogenase	ALDH9A1	NaN	NaN	NaN	NaN	0	28.2657	28.2657	NaN	NaN	1	NaN	NaN	NaN	NaN	0	NaN	NaN	NaN	NaN	0	NaN	NaN	NaN	NaN	0	NaN	NaN	NaN	NaN	0	28.9886	28.9886	NaN	NaN	1	NaN	NaN	NaN	NaN	0	29.4436	29.4436	NaN	NaN	1	NaN	NaN
P49207	60S ribosomal protein L34	RPL34	29.7905	29.7905	NaN	NaN	1	29.5257	29.5257	NaN	NaN	1	28.7666	28.7666	NaN	NaN	1	28.8981	28.8981	0.80195	0.0277509	2	28.8162	28.8162	0.0598418	0.00207667	2	29.5544	29.5544	0.278583	0.00942613	2	29.9765	29.9765	0.0511777	0.00170726	2	29.7945	29.9273	0.322278	0.0108167	3	30.3253	30.3187	0.379962	0.0125295	3	NaN	NaN
P49257	Protein ERGIC-53	LMAN1	NaN	NaN	NaN	NaN	0	NaN	NaN	NaN	NaN	0	26.0859	26.0859	NaN	NaN	1	NaN	NaN	NaN	NaN	0	26.7622	26.7622	NaN	NaN	1	NaN	NaN	NaN	NaN	0	NaN	NaN	NaN	NaN	0	NaN	NaN	NaN	NaN	0	NaN	NaN	NaN	NaN	0	NaN	NaN
P49321	Nuclear autoantigenic sperm protein	NASP	29.354	29.4045	0.167884	0.00571928	3	29.1348	29.2955	0.492669	0.01691	3	29.5418	29.3815	0.293526	0.00993596	3	29.5115	29.3062	0.486873	0.0164977	3	29.5454	29.365	0.441957	0.0149585	3	29.0278	29.2689	0.625067	0.0215334	3	29.9448	29.9448	1.05405	0.0351996	2	29.3948	29.7772	1.00644	0.0342387	3	29.6364	30.5843	1.81935	0.0613891	3	29.4908	29.2955
P49327	Fatty acid synthase;[Acyl-carrier-protein] S-acetyltransferase;[Acyl-carrier-protein] S-malonyltransferase;3-oxoacyl-[acyl-carrier-protein] synthase;3-oxoacyl-[acyl-carrier-protein] reductase;3-hydroxyacyl-[acyl-carrier-protein] dehydratase;Enoyl-[acyl-carrier-protein] reductase;Oleoyl-[acyl-carrier-protein] hydrolase	FASN	29.7511	29.8331	0.488231	0.0164105	3	29.8812	29.8947	0.316955	0.0106072	3	29.8638	29.6857	0.416527	0.0139475	3	28.8631	29.1811	1.08187	0.037483	3	30.1947	30.2071	0.121662	0.00402924	3	29.7782	30.0293	0.560016	0.0188063	3	29.3435	29.3435	0.0126103	0.00042975	2	29.7491	29.6517	0.426258	0.0143285	3	29.3807	29.7516	0.653008	0.0222258	3	30.1932	29.5577
P49368	T-complex protein 1 subunit gamma	CCT3	31.5852	31.6664	0.366602	0.0116068	3	31.2743	31.5476	0.612964	0.0195996	3	32.0172	32.0251	0.265937	0.00830607	3	30.7337	30.7129	0.451525	0.0146915	3	31.0046	30.7556	0.656802	0.021184	3	31.2394	31.0558	0.493822	0.0158077	3	31.6304	31.6304	0.0584513	0.00184795	2	30.4895	30.8065	0.87135	0.0285787	3	31.4853	31.4853	0.236674	0.00751697	2	31.6664	31.703
P49411	Elongation factor Tu, mitochondrial	TUFM	29.4611	29.3684	0.285184	0.00968001	3	29.6508	29.811	0.482656	0.016278	3	29.4013	29.3679	0.109957	0.00373987	3	28.9967	28.9967	0.19623	0.00676734	2	29.3488	29.6023	0.840211	0.0286285	3	29.6166	29.4981	0.315723	0.0106603	3	29.2339	28.9504	0.505088	0.0172775	3	29.4635	29.9228	0.809868	0.0274872	3	29.4028	29.3376	0.356441	0.0121227	3	29.7811	29.1084
P49419	Alpha-aminoadipic semialdehyde dehydrogenase	ALDH7A1	NaN	NaN	NaN	NaN	0	NaN	NaN	NaN	NaN	0	27.4731	27.4731	0.436409	0.015885	2	27.7265	27.7265	NaN	NaN	1	27.6532	27.6532	0.992769	0.0359008	2	NaN	NaN	NaN	NaN	0	27.4092	27.4092	NaN	NaN	1	27.4241	27.4241	NaN	NaN	1	27.7802	27.7802	NaN	NaN	1	NaN	NaN
P49458	Signal recognition particle 9 kDa protein	SRP9	26.6306	26.6306	1.97401	0.0741257	2	28.1086	27.9858	0.387343	0.0137802	3	26.8852	26.8851	0.343353	0.0127711	3	27.8234	27.8234	0.501452	0.0180226	2	27.5127	27.9351	1.13646	0.0413066	3	27.984	28.2952	0.624063	0.0223007	3	27.057	27.057	0.23525	0.00869459	2	25.1296	25.1296	NaN	NaN	1	NaN	NaN	NaN	NaN	0	28.0264	27.9858
P49588	Alanine--tRNA ligase, cytoplasmic	AARS	29.0627	29.1602	0.430563	0.014815	3	29.1495	29.0742	0.330374	0.0113338	3	28.9494	28.8095	0.462498	0.0159761	3	28.7802	28.794	0.600635	0.0208697	3	28.9437	28.8327	0.231821	0.00800935	3	29.1878	29.188	0.196049	0.00671682	3	29.5146	29.5146	0.177145	0.00600194	2	28.7679	28.7331	0.28394	0.00987003	3	29.3781	29.3781	0.493382	0.0167943	2	29.1602	28.8632
P49589	Cysteine--tRNA ligase, cytoplasmic	CARS	NaN	NaN	NaN	NaN	0	26.8566	26.8566	NaN	NaN	1	26.1621	26.1621	NaN	NaN	1	NaN	NaN	NaN	NaN	0	27.2125	27.2125	NaN	NaN	1	NaN	NaN	NaN	NaN	0	NaN	NaN	NaN	NaN	0	NaN	NaN	NaN	NaN	0	NaN	NaN	NaN	NaN	0	NaN	26.8566
P49590	Probable histidine--tRNA ligase, mitochondrial	HARS2	27.2314	27.2314	NaN	NaN	1	26.8124	26.8124	NaN	NaN	1	NaN	NaN	NaN	NaN	0	NaN	NaN	NaN	NaN	0	NaN	NaN	NaN	NaN	0	NaN	NaN	NaN	NaN	0	27.0878	27.0878	NaN	NaN	1	NaN	NaN	NaN	NaN	0	NaN	NaN	NaN	NaN	0	NaN	NaN
P49591	Serine--tRNA ligase, cytoplasmic	SARS	27.1627	27.2925	0.399461	0.0147062	3	27.4514	27.5445	0.686043	0.0249912	3	27.1363	27.0363	0.275389	0.0101484	3	26.9757	26.9757	0.0754233	0.00279597	2	27.0367	27.1709	0.242099	0.00895444	3	28.048	28.048	NaN	NaN	1	NaN	NaN	NaN	NaN	0	NaN	NaN	NaN	NaN	0	NaN	NaN	NaN	NaN	0	26.7145	26.7235
P49593	Protein phosphatase 1F	PPM1F	28.8824	28.8824	NaN	NaN	1	NaN	NaN	NaN	NaN	0	NaN	NaN	NaN	NaN	0	30.0937	30.0937	NaN	NaN	1	NaN	NaN	NaN	NaN	0	NaN	NaN	NaN	NaN	0	NaN	NaN	NaN	NaN	0	NaN	NaN	NaN	NaN	0	NaN	NaN	NaN	NaN	0	NaN	NaN
P49643	DNA primase large subunit	PRIM2	NaN	NaN	NaN	NaN	0	NaN	NaN	NaN	NaN	0	NaN	NaN	NaN	NaN	0	26.5039	26.5039	NaN	NaN	1	NaN	NaN	NaN	NaN	0	NaN	NaN	NaN	NaN	0	NaN	NaN	NaN	NaN	0	NaN	NaN	NaN	NaN	0	NaN	NaN	NaN	NaN	0	NaN	NaN
P49720	Proteasome subunit beta type-3	PSMB3	NaN	NaN	NaN	NaN	0	28.574	28.574	NaN	NaN	1	27.7331	27.7331	NaN	NaN	1	NaN	NaN	NaN	NaN	0	27.6054	27.6054	0.27053	0.0097999	2	NaN	NaN	NaN	NaN	0	NaN	NaN	NaN	NaN	0	28.1337	28.1337	0.19911	0.00707728	2	NaN	NaN	NaN	NaN	0	NaN	NaN
P49721	Proteasome subunit beta type-2	PSMB2	27.8813	28.0597	0.409066	0.0146717	3	28.0133	28.0133	0.712379	0.0254301	2	27.3141	27.3141	0.578499	0.0211795	2	27.8501	27.8501	NaN	NaN	1	28.2179	28.3246	0.330758	0.0117216	3	28.0164	27.8367	0.879512	0.0313928	3	28.0311	28.0311	0.395182	0.014098	2	28.4599	28.646	0.714258	0.025097	3	28.0983	28.0983	NaN	NaN	1	27.4133	27.5095
P49736	DNA replication licensing factor MCM2	MCM2	28.0029	27.8196	0.489352	0.0174751	3	27.6712	28.1029	0.855581	0.0309195	3	27.8562	28.0467	0.623831	0.0223947	3	28.0225	28.0225	0.651133	0.0232361	2	27.663	27.663	NaN	NaN	1	27.8138	27.8138	0.181021	0.00650832	2	26.9458	26.9458	1.83715	0.0681796	2	NaN	NaN	NaN	NaN	0	28.5336	28.5336	NaN	NaN	1	28.5574	28.1029
P49748	Very long-chain specific acyl-CoA dehydrogenase, mitochondrial	ACADVL	27.7179	27.7179	0.260743	0.009407	2	27.8407	27.9981	0.296747	0.0106588	3	27.3627	27.3524	0.345158	0.0126142	3	27.1917	27.2282	0.0880806	0.00323925	3	27.0158	26.9156	0.75827	0.0280676	3	27.9457	27.9457	0.403223	0.0144288	2	26.9582	26.9582	0.510346	0.018931	2	27.3381	27.3381	1.24926	0.0456968	2	27.2042	27.2042	1.19098	0.0437792	2	27.5336	28.0255
P49750	YLP motif-containing protein 1	YLPM1	NaN	NaN	NaN	NaN	0	NaN	NaN	NaN	NaN	0	25.3525	25.3525	NaN	NaN	1	NaN	NaN	NaN	NaN	0	NaN	NaN	NaN	NaN	0	NaN	NaN	NaN	NaN	0	NaN	NaN	NaN	NaN	0	NaN	NaN	NaN	NaN	0	NaN	NaN	NaN	NaN	0	NaN	NaN
P49755	Transmembrane emp24 domain-containing protein 10	TMED10	28.7197	28.7197	0.140355	0.00488707	2	28.1738	28.229	0.527998	0.0187408	3	28.7067	28.7372	0.249455	0.00868978	3	28.3859	28.3859	0.0499895	0.00176107	2	29.1707	28.8906	0.510935	0.0175154	3	27.7506	27.7506	0.926145	0.0333739	2	29.1708	29.1708	NaN	NaN	1	28.8441	28.8441	0.0976418	0.00338516	2	28.6474	28.6474	0.420217	0.0146686	2	28.8189	28.672
P49756	RNA-binding protein 25	RBM25	NaN	NaN	NaN	NaN	0	25.9994	25.9994	NaN	NaN	1	NaN	NaN	NaN	NaN	0	NaN	NaN	NaN	NaN	0	26.6554	26.6554	NaN	NaN	1	27.5863	27.5863	NaN	NaN	1	NaN	NaN	NaN	NaN	0	26.4163	26.4163	NaN	NaN	1	NaN	NaN	NaN	NaN	0	NaN	NaN
P49790	Nuclear pore complex protein Nup153	NUP153	NaN	NaN	NaN	NaN	0	NaN	NaN	NaN	NaN	0	26.6013	26.6013	NaN	NaN	1	NaN	NaN	NaN	NaN	0	NaN	NaN	NaN	NaN	0	26.0563	26.0563	NaN	NaN	1	NaN	NaN	NaN	NaN	0	NaN	NaN	NaN	NaN	0	NaN	NaN	NaN	NaN	0	NaN	NaN
P49792	E3 SUMO-protein ligase RanBP2	RANBP2	27.0114	27.0114	0.566825	0.0209846	2	26.8098	27.056	0.456912	0.0170427	3	27.6772	27.6772	0.0869547	0.00314174	2	27.6248	27.6248	NaN	NaN	1	27.1057	27.2141	0.363744	0.0134195	3	27.0862	27.0862	NaN	NaN	1	26.4639	26.4639	0.20488	0.00774184	2	27.6038	27.6038	NaN	NaN	1	27.1841	27.1841	NaN	NaN	1	27.4122	27.0908
P49821	NADH dehydrogenase [ubiquinone] flavoprotein 1, mitochondrial	NDUFV1	27.4049	27.1282	0.536324	0.0195704	3	27.1597	27.1414	0.730443	0.0268944	3	27.357	27.2013	0.293011	0.0107106	3	27.1546	27.038	0.378952	0.0139554	3	27.1339	27.1339	0.0733409	0.00270293	2	27.8013	27.8013	0.300729	0.0108171	2	26.7246	26.7369	0.448032	0.0167648	3	27.2375	27.2375	0.432002	0.0158606	2	27.6384	27.6384	NaN	NaN	1	27.1282	27.8991
P49840	Glycogen synthase kinase-3 alpha	GSK3A	NaN	NaN	NaN	NaN	0	NaN	NaN	NaN	NaN	0	NaN	NaN	NaN	NaN	0	NaN	NaN	NaN	NaN	0	NaN	NaN	NaN	NaN	0	NaN	NaN	NaN	NaN	0	24.1603	24.1603	NaN	NaN	1	NaN	NaN	NaN	NaN	0	NaN	NaN	NaN	NaN	0	NaN	NaN
P49902	Cytosolic purine 5-nucleotidase	NT5C2	NaN	NaN	NaN	NaN	0	NaN	NaN	NaN	NaN	0	NaN	NaN	NaN	NaN	0	NaN	NaN	NaN	NaN	0	26.2522	26.2522	NaN	NaN	1	27.4907	27.4907	NaN	NaN	1	NaN	NaN	NaN	NaN	0	NaN	NaN	NaN	NaN	0	26.4144	26.4144	NaN	NaN	1	NaN	NaN
P49903	Selenide, water dikinase 1	SEPHS1	NaN	NaN	NaN	NaN	0	26.0816	26.0816	NaN	NaN	1	28.6521	28.6521	NaN	NaN	1	NaN	NaN	NaN	NaN	0	26.075	26.075	NaN	NaN	1	25.6115	25.6115	NaN	NaN	1	NaN	NaN	NaN	NaN	0	28.4288	28.4288	NaN	NaN	1	NaN	NaN	NaN	NaN	0	NaN	26.0816
P49908	Selenoprotein P	SEPP1	28.942	28.942	NaN	NaN	1	NaN	NaN	NaN	NaN	0	NaN	NaN	NaN	NaN	0	NaN	NaN	NaN	NaN	0	NaN	NaN	NaN	NaN	0	28.7288	28.7288	NaN	NaN	1	29.2094	29.2094	1.16423	0.0398581	2	29.2615	29.2615	NaN	NaN	1	NaN	NaN	NaN	NaN	0	28.942	NaN
P49915	GMP synthase [glutamine-hydrolyzing]	GMPS	27.6158	27.6158	0.0957401	0.00346686	2	27.5375	27.5375	0.537636	0.0195238	2	27.7282	27.7282	0.623978	0.0225034	2	27.5977	27.5977	NaN	NaN	1	27.24	27.24	0.182727	0.00670805	2	26.8528	26.8528	0.871629	0.0324596	2	NaN	NaN	NaN	NaN	0	27.697	27.697	1.04629	0.0377762	2	27.6683	27.6683	NaN	NaN	1	27.6835	NaN
P49916	DNA ligase 3	LIG3	27.501	27.501	NaN	NaN	1	NaN	NaN	NaN	NaN	0	NaN	NaN	NaN	NaN	0	NaN	NaN	NaN	NaN	0	27.7419	27.7419	NaN	NaN	1	NaN	NaN	NaN	NaN	0	NaN	NaN	NaN	NaN	0	NaN	NaN	NaN	NaN	0	NaN	NaN	NaN	NaN	0	NaN	NaN
P49959	Double-strand break repair protein MRE11A	MRE11A	NaN	NaN	NaN	NaN	0	25.577	25.577	NaN	NaN	1	NaN	NaN	NaN	NaN	0	24.8699	24.8699	NaN	NaN	1	NaN	NaN	NaN	NaN	0	26.3421	26.3421	NaN	NaN	1	NaN	NaN	NaN	NaN	0	NaN	NaN	NaN	NaN	0	NaN	NaN	NaN	NaN	0	NaN	NaN
P50213	Isocitrate dehydrogenase [NAD] subunit alpha, mitochondrial	IDH3A	28.3302	28.3302	NaN	NaN	1	28.3981	28.3981	NaN	NaN	1	NaN	NaN	NaN	NaN	0	23.9549	23.9549	NaN	NaN	1	27.6816	27.6816	NaN	NaN	1	26.8489	26.8489	NaN	NaN	1	24.3457	24.3457	NaN	NaN	1	NaN	NaN	NaN	NaN	0	24.0179	24.0179	NaN	NaN	1	28.3302	NaN
P50225	Sulfotransferase 1A1;Sulfotransferase 1A4;Sulfotransferase 1A3	SULT1A1	NaN	NaN	NaN	NaN	0	NaN	NaN	NaN	NaN	0	NaN	NaN	NaN	NaN	0	NaN	NaN	NaN	NaN	0	26.3695	26.3695	NaN	NaN	1	NaN	NaN	NaN	NaN	0	NaN	NaN	NaN	NaN	0	NaN	NaN	NaN	NaN	0	NaN	NaN	NaN	NaN	0	NaN	NaN
P50395	Rab GDP dissociation inhibitor beta	GDI2	29.5031	29.2504	0.624266	0.0211593	3	29.1277	29.3708	0.824598	0.0283098	3	29.2291	29.1683	0.308883	0.0105676	3	29.1576	29.3117	0.302843	0.0103864	3	29.6706	29.536	0.534077	0.0180002	3	30.093	30.0454	0.412094	0.013694	3	29.0907	29.0907	0.364436	0.0125276	2	30.0793	30.2458	0.633094	0.0210475	3	29.3417	29.3843	0.379614	0.0129377	3	29.0448	28.2089
P50416	Carnitine O-palmitoyltransferase 1, liver isoform	CPT1A	26.469	26.469	0.768106	0.0290191	2	26.0701	26.0701	NaN	NaN	1	26.3172	26.3172	0.283118	0.0107579	2	NaN	NaN	NaN	NaN	0	26.3552	26.3552	0.695981	0.0264077	2	25.8717	25.8717	0.202526	0.0078281	2	26.4591	26.4591	NaN	NaN	1	NaN	NaN	NaN	NaN	0	NaN	NaN	NaN	NaN	0	27.0121	NaN
P50453	Serpin B9	SERPINB9	26.5486	26.4973	0.504204	0.0189918	3	26.5777	26.5777	0.265249	0.00998014	2	26.3389	26.3389	0.0279788	0.00106226	2	26.4342	26.4342	NaN	NaN	1	26.6604	26.6604	NaN	NaN	1	26.3665	26.3665	NaN	NaN	1	27.5491	27.5491	NaN	NaN	1	NaN	NaN	NaN	NaN	0	26.5016	26.5016	NaN	NaN	1	27.0764	26.7652
P50454	Serpin H1	SERPINH1	29.0693	29.0693	0.0314908	0.0010833	2	28.2918	28.3684	0.981431	0.0346896	3	29.4528	29.4667	0.444774	0.0151012	3	27.4299	27.4299	0.105068	0.00383041	2	28.4402	28.3209	0.628607	0.0221028	3	28.0177	28.3943	0.688383	0.0245696	3	27.7635	27.7635	0.0298615	0.00107557	2	28.8904	29.0837	0.378445	0.0130993	3	29.5785	29.5785	0.721539	0.0243941	2	29.0471	28.3684
P50502	Hsc70-interacting protein;Putative protein FAM10A5;Putative protein FAM10A4	ST13	30.0376	29.9807	0.166659	0.00554835	3	30.1586	30.0863	0.475859	0.0157785	3	30.0177	30.0115	0.0876555	0.00292013	3	30.1805	29.9969	0.326565	0.0108204	3	30.3531	30.3373	0.232395	0.00765639	3	30.0757	30.1862	0.270418	0.00899125	3	29.0166	29.6389	1.0874	0.0374749	3	29.207	29.2992	0.270438	0.00925934	3	27.9507	28.1538	1.22406	0.0437935	3	29.9807	30.0863
P50542	Peroxisomal targeting signal 1 receptor	PEX5	NaN	NaN	NaN	NaN	0	25.3254	25.3254	NaN	NaN	1	NaN	NaN	NaN	NaN	0	24.0851	24.0851	NaN	NaN	1	NaN	NaN	NaN	NaN	0	NaN	NaN	NaN	NaN	0	NaN	NaN	NaN	NaN	0	NaN	NaN	NaN	NaN	0	NaN	NaN	NaN	NaN	0	NaN	NaN
P50552	Vasodilator-stimulated phosphoprotein	VASP	27.1204	27.1204	NaN	NaN	1	25.7736	25.7736	NaN	NaN	1	25.7529	25.7529	NaN	NaN	1	NaN	NaN	NaN	NaN	0	26.4947	26.4947	NaN	NaN	1	NaN	NaN	NaN	NaN	0	NaN	NaN	NaN	NaN	0	NaN	NaN	NaN	NaN	0	NaN	NaN	NaN	NaN	0	27.1204	25.7736
P50570	Dynamin-2	DNM2	26.9567	26.9567	NaN	NaN	1	26.1729	26.1729	NaN	NaN	1	26.8084	26.8084	0.0204854	0.000764141	2	26.9939	26.9939	NaN	NaN	1	26.5527	26.5527	0.317002	0.0119386	2	26.3429	26.3429	0.0703886	0.00267201	2	24.1503	24.1503	NaN	NaN	1	NaN	NaN	NaN	NaN	0	NaN	NaN	NaN	NaN	0	26.9567	NaN
P50748	Kinetochore-associated protein 1	KNTC1	NaN	NaN	NaN	NaN	0	NaN	NaN	NaN	NaN	0	NaN	NaN	NaN	NaN	0	NaN	NaN	NaN	NaN	0	26.452	26.452	NaN	NaN	1	NaN	NaN	NaN	NaN	0	NaN	NaN	NaN	NaN	0	NaN	NaN	NaN	NaN	0	NaN	NaN	NaN	NaN	0	NaN	NaN
P50750	Cyclin-dependent kinase 9	CDK9	27.1037	27.1037	NaN	NaN	1	NaN	NaN	NaN	NaN	0	NaN	NaN	NaN	NaN	0	NaN	NaN	NaN	NaN	0	NaN	NaN	NaN	NaN	0	25.5805	25.5805	NaN	NaN	1	NaN	NaN	NaN	NaN	0	NaN	NaN	NaN	NaN	0	NaN	NaN	NaN	NaN	0	27.1037	NaN
P50851	Lipopolysaccharide-responsive and beige-like anchor protein	LRBA	NaN	NaN	NaN	NaN	0	26.7892	26.7892	NaN	NaN	1	26.2539	26.2539	NaN	NaN	1	NaN	NaN	NaN	NaN	0	26.0042	26.0042	NaN	NaN	1	NaN	NaN	NaN	NaN	0	NaN	NaN	NaN	NaN	0	NaN	NaN	NaN	NaN	0	NaN	NaN	NaN	NaN	0	NaN	26.7892
P50895	Basal cell adhesion molecule	BCAM	NaN	NaN	NaN	NaN	0	NaN	NaN	NaN	NaN	0	22.9764	22.9764	0.145016	0.00631153	2	NaN	NaN	NaN	NaN	0	NaN	NaN	NaN	NaN	0	NaN	NaN	NaN	NaN	0	NaN	NaN	NaN	NaN	0	NaN	NaN	NaN	NaN	0	NaN	NaN	NaN	NaN	0	NaN	NaN
P50897	Palmitoyl-protein thioesterase 1	PPT1	27.9209	27.9209	NaN	NaN	1	NaN	NaN	NaN	NaN	0	28.2284	28.2284	NaN	NaN	1	NaN	NaN	NaN	NaN	0	NaN	NaN	NaN	NaN	0	NaN	NaN	NaN	NaN	0	NaN	NaN	NaN	NaN	0	NaN	NaN	NaN	NaN	0	NaN	NaN	NaN	NaN	0	NaN	NaN
P50914	60S ribosomal protein L14	RPL14	27.7169	27.7133	0.119103	0.00429714	3	27.7588	27.6965	0.420845	0.0151608	3	27.3525	27.3525	0.00249914	9.13677e-05	2	27.2159	27.2159	0.151166	0.00555434	2	28.0647	28.0647	NaN	NaN	1	27.4839	27.4839	0.0169019	0.000614974	2	28.1204	28.1204	NaN	NaN	1	27.7447	27.9325	0.392443	0.0141448	3	27.9916	27.9916	0.236852	0.00846154	2	27.7133	27.3725
P50990	T-complex protein 1 subunit theta	CCT8	30.5627	30.4928	0.198112	0.00648215	3	30.1629	30.2494	0.165049	0.00547193	3	30.5545	30.5822	0.175644	0.00574855	3	30.5245	30.5345	0.407895	0.0133629	3	30.4933	30.3064	0.330777	0.0108475	3	30.2769	30.1215	0.291465	0.00962663	3	30.4132	30.5299	0.392757	0.0129141	3	30.2745	30.2334	0.340523	0.0112478	3	30.6543	30.7466	0.165012	0.00538299	3	30.7863	29.9725
P50991	T-complex protein 1 subunit delta	CCT4	29.7962	29.7095	0.238685	0.00801058	3	29.7209	29.7611	0.240694	0.00809848	3	29.592	29.8708	0.805917	0.0272343	3	29.5465	29.4718	0.287477	0.00972964	3	29.5036	29.8315	0.801523	0.027167	3	29.8562	29.7586	0.187153	0.00626846	3	28.5565	28.9671	0.714432	0.0250182	3	29.4313	29.4321	0.394993	0.0134209	3	28.6858	28.8856	0.453445	0.0158073	3	29.613	29.939
P50993	Sodium/potassium-transporting ATPase subunit alpha-2	ATP1A2	28.1383	28.1383	1.08021	0.0383893	2	28.5999	28.5999	0.462968	0.0161878	2	27.6826	27.6826	0.400658	0.0144733	2	27.25	27.25	NaN	NaN	1	28.1088	28.1088	0.17701	0.00629731	2	26.8566	26.8566	0.766102	0.0285256	2	NaN	NaN	NaN	NaN	0	27.3984	27.3984	NaN	NaN	1	NaN	NaN	NaN	NaN	0	28.9022	NaN
P50995	Annexin A11	ANXA11	NaN	NaN	NaN	NaN	0	NaN	NaN	NaN	NaN	0	NaN	NaN	NaN	NaN	0	26.1587	26.1587	NaN	NaN	1	26.13	26.13	NaN	NaN	1	26.1976	26.1976	NaN	NaN	1	24.9273	24.9273	NaN	NaN	1	NaN	NaN	NaN	NaN	0	NaN	NaN	NaN	NaN	0	NaN	NaN
P51003	Poly(A) polymerase alpha	PAPOLA	26.1307	26.1307	NaN	NaN	1	26.3371	26.3371	NaN	NaN	1	25.883	25.883	0.477734	0.0184574	2	NaN	NaN	NaN	NaN	0	NaN	NaN	NaN	NaN	0	NaN	NaN	NaN	NaN	0	NaN	NaN	NaN	NaN	0	NaN	NaN	NaN	NaN	0	NaN	NaN	NaN	NaN	0	NaN	26.3371
P51114	Fragile X mental retardation syndrome-related protein 1	FXR1	29.3768	29.3768	1.23629	0.0420838	2	28.8077	28.8077	0.197195	0.0068452	2	28.1358	28.1025	0.323115	0.0114841	3	28.5398	28.5398	0.347185	0.012165	2	29.0992	29.0992	NaN	NaN	1	NaN	NaN	NaN	NaN	0	27.925	27.925	0.280648	0.0100501	2	27.8411	27.7271	0.426733	0.0153274	3	28.4307	28.4307	0.176136	0.00619527	2	30.251	28.9472
P51116	Fragile X mental retardation syndrome-related protein 2	FXR2	28.3076	28.3076	NaN	NaN	1	28.6126	28.6126	0.197184	0.0068915	2	28.0295	28.1736	0.345206	0.0123158	3	28.5902	28.5902	NaN	NaN	1	28.9041	28.9041	NaN	NaN	1	NaN	NaN	NaN	NaN	0	27.7743	27.7743	0.217869	0.00784426	2	27.5283	27.5283	0.340131	0.0123557	2	27.8817	27.8817	NaN	NaN	1	NaN	28.7521
P51148	Ras-related protein Rab-5C	RAB5C	28.4024	28.2448	0.454026	0.0159855	3	28.0827	28.1885	0.303974	0.0108243	3	28.4163	28.5268	0.262636	0.00924245	3	28.0413	28.0413	0.291461	0.010394	2	27.983	27.6773	0.531769	0.0190033	3	28.4212	28.4212	1.07285	0.0377481	2	28.5196	28.5196	0.449279	0.0157533	2	28.4831	28.3788	0.48519	0.0170343	3	28.8436	28.849	0.172756	0.0059894	3	28.0481	28.1885
P51149	Ras-related protein Rab-7a	RAB7A	29.0575	29.3057	0.927633	0.0319241	3	28.4434	28.3469	1.18725	0.0417408	3	29.2514	29.2482	0.220116	0.00752497	3	29.4771	29.4075	0.389178	0.0132027	3	29.1301	29.1301	0.323494	0.0111051	2	29.2239	29.0333	0.83006	0.0284034	3	29.3791	29.511	0.270727	0.00921496	3	29.1405	29.1405	0.210524	0.00722445	2	29.5345	29.5345	0.328864	0.0111349	2	29.8357	28.3469
P51151	Ras-related protein Rab-9A;Ras-related protein Rab-9B	RAB9A	NaN	NaN	NaN	NaN	0	25.5471	25.5471	NaN	NaN	1	NaN	NaN	NaN	NaN	0	NaN	NaN	NaN	NaN	0	NaN	NaN	NaN	NaN	0	NaN	NaN	NaN	NaN	0	NaN	NaN	NaN	NaN	0	NaN	NaN	NaN	NaN	0	NaN	NaN	NaN	NaN	0	NaN	25.5471
P51153	Ras-related protein Rab-13	RAB13	29.9768	29.5438	0.886757	0.0295814	3	30.2428	29.8955	0.826859	0.0273407	3	30.1778	29.947	0.586498	0.0194348	3	30.7149	30.7173	0.234159	0.00762362	3	30.9084	30.9084	0.259182	0.00838551	2	30.8637	30.5431	0.706845	0.0229022	3	30.5269	30.3971	0.341551	0.0111885	3	30.363	30.3961	0.246322	0.00811258	3	30.6505	30.6505	0.469814	0.0153281	2	29.3897	31.1867
P51398	28S ribosomal protein S29, mitochondrial	DAP3	26.1531	26.1531	NaN	NaN	1	NaN	NaN	NaN	NaN	0	26.6391	26.6391	0.825481	0.0309876	2	26.0925	26.0925	NaN	NaN	1	26.6427	26.6427	NaN	NaN	1	26.3083	26.3083	0.617831	0.0234842	2	NaN	NaN	NaN	NaN	0	NaN	NaN	NaN	NaN	0	26.8794	26.8794	NaN	NaN	1	NaN	NaN
P51452	Dual specificity protein phosphatase 3	DUSP3	NaN	NaN	NaN	NaN	0	NaN	NaN	NaN	NaN	0	NaN	NaN	NaN	NaN	0	28.2272	28.2272	NaN	NaN	1	NaN	NaN	NaN	NaN	0	NaN	NaN	NaN	NaN	0	NaN	NaN	NaN	NaN	0	NaN	NaN	NaN	NaN	0	NaN	NaN	NaN	NaN	0	NaN	NaN
P51570	Galactokinase	GALK1	29.6266	29.6266	NaN	NaN	1	NaN	NaN	NaN	NaN	0	28.735	28.735	NaN	NaN	1	29.0403	29.0403	NaN	NaN	1	NaN	NaN	NaN	NaN	0	NaN	NaN	NaN	NaN	0	NaN	NaN	NaN	NaN	0	28.3411	28.3411	NaN	NaN	1	NaN	NaN	NaN	NaN	0	29.6266	NaN
P51572	B-cell receptor-associated protein 31	BCAP31	NaN	NaN	NaN	NaN	0	NaN	NaN	NaN	NaN	0	NaN	NaN	NaN	NaN	0	NaN	NaN	NaN	NaN	0	26.0451	26.0451	NaN	NaN	1	NaN	NaN	NaN	NaN	0	NaN	NaN	NaN	NaN	0	27.3885	27.3885	NaN	NaN	1	NaN	NaN	NaN	NaN	0	NaN	NaN
P51580	Thiopurine S-methyltransferase	TPMT	24.8917	24.8917	NaN	NaN	1	NaN	NaN	NaN	NaN	0	NaN	NaN	NaN	NaN	0	NaN	NaN	NaN	NaN	0	NaN	NaN	NaN	NaN	0	NaN	NaN	NaN	NaN	0	NaN	NaN	NaN	NaN	0	NaN	NaN	NaN	NaN	0	NaN	NaN	NaN	NaN	0	24.8917	NaN
P51610	Host cell factor 1;HCF N-terminal chain 1;HCF N-terminal chain 2;HCF N-terminal chain 3;HCF N-terminal chain 4;HCF N-terminal chain 5;HCF N-terminal chain 6;HCF C-terminal chain 1;HCF C-terminal chain 2;HCF C-terminal chain 3;HCF C-terminal chain 4;HCF C-terminal chain 5;HCF C-terminal chain 6	HCFC1	26.9639	26.9736	0.135075	0.00500946	3	26.648	26.5908	0.556494	0.0208831	3	26.8655	26.8655	0.226146	0.00841771	2	26.6834	26.8675	0.636869	0.0238677	3	27.2946	27.2946	0.0529783	0.00194098	2	26.7675	26.7675	1.0958	0.0409377	2	27.4019	27.4019	0.641752	0.0234199	2	27.094	27.094	0.299437	0.0110518	2	27.0111	27.0918	0.538564	0.0199387	3	26.8243	26.1224
P51617	Interleukin-1 receptor-associated kinase 1	IRAK1	NaN	NaN	NaN	NaN	0	NaN	NaN	NaN	NaN	0	NaN	NaN	NaN	NaN	0	NaN	NaN	NaN	NaN	0	NaN	NaN	NaN	NaN	0	27.0328	27.0328	1.61623	0.059788	2	NaN	NaN	NaN	NaN	0	NaN	NaN	NaN	NaN	0	NaN	NaN	NaN	NaN	0	NaN	NaN
P51648	Fatty aldehyde dehydrogenase	ALDH3A2	26.8988	26.8988	0.00684869	0.000254609	2	26.6668	26.6668	NaN	NaN	1	27.2076	27.2076	0.371285	0.0136464	2	NaN	NaN	NaN	NaN	0	NaN	NaN	NaN	NaN	0	26.4936	26.4936	0.652893	0.0246434	2	NaN	NaN	NaN	NaN	0	NaN	NaN	NaN	NaN	0	26.826	26.826	NaN	NaN	1	26.9037	26.6668
P51649	Succinate-semialdehyde dehydrogenase, mitochondrial	ALDH5A1	NaN	NaN	NaN	NaN	0	NaN	NaN	NaN	NaN	0	NaN	NaN	NaN	NaN	0	NaN	NaN	NaN	NaN	0	24.5034	24.5034	NaN	NaN	1	24.508	24.508	NaN	NaN	1	NaN	NaN	NaN	NaN	0	25.3111	25.3111	NaN	NaN	1	NaN	NaN	NaN	NaN	0	NaN	NaN
P51659	Peroxisomal multifunctional enzyme type 2;(3R)-hydroxyacyl-CoA dehydrogenase;Enoyl-CoA hydratase 2	HSD17B4	23.3538	23.3538	NaN	NaN	1	NaN	NaN	NaN	NaN	0	24.6661	24.6661	0.343592	0.0139297	2	NaN	NaN	NaN	NaN	0	31.4891	31.4891	NaN	NaN	1	23.2535	23.2535	NaN	NaN	1	NaN	NaN	NaN	NaN	0	NaN	NaN	NaN	NaN	0	NaN	NaN	NaN	NaN	0	23.3538	NaN
P51665	26S proteasome non-ATPase regulatory subunit 7	PSMD7	28.0969	28.0969	0.118083	0.00420269	2	29.0299	29.0299	0.773306	0.0266383	2	28.7785	29.0985	0.69148	0.0240277	3	28.2932	28.2932	NaN	NaN	1	NaN	NaN	NaN	NaN	0	27.1807	27.1807	0.426333	0.0156851	2	NaN	NaN	NaN	NaN	0	28.6058	28.6058	0.736507	0.0257468	2	28.6859	28.6859	0.0278749	0.000971729	2	28.0135	29.5767
P51784	Ubiquitin carboxyl-terminal hydrolase 11	USP11	NaN	NaN	NaN	NaN	0	28.7517	28.7517	NaN	NaN	1	NaN	NaN	NaN	NaN	0	NaN	NaN	NaN	NaN	0	NaN	NaN	NaN	NaN	0	NaN	NaN	NaN	NaN	0	NaN	NaN	NaN	NaN	0	NaN	NaN	NaN	NaN	0	NaN	NaN	NaN	NaN	0	NaN	NaN
P51809	Vesicle-associated membrane protein 7	VAMP7	25.4085	25.4085	0.0385256	0.00151625	2	NaN	NaN	NaN	NaN	0	24.9632	24.9632	NaN	NaN	1	NaN	NaN	NaN	NaN	0	NaN	NaN	NaN	NaN	0	NaN	NaN	NaN	NaN	0	NaN	NaN	NaN	NaN	0	NaN	NaN	NaN	NaN	0	NaN	NaN	NaN	NaN	0	NaN	NaN
P51812	Ribosomal protein S6 kinase alpha-3	RPS6KA3	NaN	NaN	NaN	NaN	0	NaN	NaN	NaN	NaN	0	NaN	NaN	NaN	NaN	0	NaN	NaN	NaN	NaN	0	NaN	NaN	NaN	NaN	0	26.1452	26.1452	NaN	NaN	1	NaN	NaN	NaN	NaN	0	NaN	NaN	NaN	NaN	0	NaN	NaN	NaN	NaN	0	NaN	NaN
P51858	Hepatoma-derived growth factor	HDGF	27.894	27.7473	0.574651	0.0206013	3	27.6413	27.9875	0.640929	0.0231873	3	28.1157	28.0329	0.267267	0.00950597	3	28.0541	28.0541	0.0719518	0.00256475	2	28.0803	28.2113	0.369473	0.0131577	3	29.0118	29.0118	NaN	NaN	1	28.9647	28.9647	0.550338	0.0190003	2	28.5407	28.5407	0.614388	0.0215267	2	28.7042	28.7042	0.411185	0.0143249	2	27.4069	28.0347
P51965	Ubiquitin-conjugating enzyme E2 E1;Ubiquitin-conjugating enzyme E2 E2;Ubiquitin-conjugating enzyme E2 E3	UBE2E1	NaN	NaN	NaN	NaN	0	25.878	25.878	NaN	NaN	1	NaN	NaN	NaN	NaN	0	NaN	NaN	NaN	NaN	0	NaN	NaN	NaN	NaN	0	NaN	NaN	NaN	NaN	0	NaN	NaN	NaN	NaN	0	NaN	NaN	NaN	NaN	0	NaN	NaN	NaN	NaN	0	NaN	25.878
P51970	NADH dehydrogenase [ubiquinone] 1 alpha subcomplex subunit 8	NDUFA8	NaN	NaN	NaN	NaN	0	NaN	NaN	NaN	NaN	0	26.0041	26.0041	NaN	NaN	1	NaN	NaN	NaN	NaN	0	NaN	NaN	NaN	NaN	0	NaN	NaN	NaN	NaN	0	NaN	NaN	NaN	NaN	0	NaN	NaN	NaN	NaN	0	NaN	NaN	NaN	NaN	0	NaN	NaN
P51991	Heterogeneous nuclear ribonucleoprotein A3	HNRNPA3	25.7863	25.7863	NaN	NaN	1	27.2659	27.2659	NaN	NaN	1	NaN	NaN	NaN	NaN	0	NaN	NaN	NaN	NaN	0	NaN	NaN	NaN	NaN	0	NaN	NaN	NaN	NaN	0	28.0676	28.0676	NaN	NaN	1	NaN	NaN	NaN	NaN	0	NaN	NaN	NaN	NaN	0	NaN	NaN
P52209	6-phosphogluconate dehydrogenase, decarboxylating	PGD	28.8763	28.8359	0.138398	0.00479277	3	29.8868	30.0018	0.289734	0.00969437	3	28.9979	29.1646	0.399326	0.0137708	3	29.4521	28.918	0.941177	0.0319562	3	28.5505	29.277	1.68054	0.0588618	3	29.3652	28.8961	1.06049	0.0361139	3	28.4164	28.5557	0.335437	0.0118043	3	29.1435	29.2438	0.659352	0.0226243	3	28.6765	28.5954	0.273668	0.00954327	3	29.0304	30.1014
P52272	Heterogeneous nuclear ribonucleoprotein M	HNRNPM	30.6635	30.6443	0.0479241	0.0015629	3	30.5989	30.6347	0.0694641	0.00227015	3	30.6915	30.7332	0.143342	0.00467041	3	30.3025	30.2218	0.373074	0.0123117	3	30.6338	30.5776	0.140609	0.00459001	3	30.3229	30.5063	0.392616	0.0129478	3	29.8318	29.7822	0.0909418	0.00304848	3	30.4829	30.4329	0.310294	0.0101793	3	30.2449	30.345	0.204389	0.00675781	3	30.6281	30.6347
P52292	Importin subunit alpha-1	KPNA2	28.8409	28.8409	0.13615	0.00472071	2	29.6795	30.2376	1.09654	0.0369459	3	29.0957	29.1969	0.201604	0.00692899	3	29.9628	29.9628	NaN	NaN	1	29.5481	29.5259	1.024	0.0346553	3	29.2401	29.6374	0.721633	0.0246795	3	29.0599	29.0599	0.361714	0.0124472	2	29.1766	29.1706	0.419455	0.0143764	3	29.6106	29.6106	0.613057	0.0207039	2	28.9372	28.4161
P52294	Importin subunit alpha-5;Importin subunit alpha-5, N-terminally processed	KPNA1	26.6313	26.6313	NaN	NaN	1	NaN	NaN	NaN	NaN	0	NaN	NaN	NaN	NaN	0	NaN	NaN	NaN	NaN	0	NaN	NaN	NaN	NaN	0	NaN	NaN	NaN	NaN	0	NaN	NaN	NaN	NaN	0	NaN	NaN	NaN	NaN	0	NaN	NaN	NaN	NaN	0	26.6313	NaN
P52306	Rap1 GTPase-GDP dissociation stimulator 1	RAP1GDS1	25.6799	25.6799	NaN	NaN	1	NaN	NaN	NaN	NaN	0	NaN	NaN	NaN	NaN	0	NaN	NaN	NaN	NaN	0	26.3141	26.3141	NaN	NaN	1	NaN	NaN	NaN	NaN	0	NaN	NaN	NaN	NaN	0	NaN	NaN	NaN	NaN	0	NaN	NaN	NaN	NaN	0	NaN	NaN
P52434	DNA-directed RNA polymerases I, II, and III subunit RPABC3	POLR2H	29.7955	29.7955	0.971301	0.0325989	2	29.1056	29.8286	1.3119	0.0450737	3	30.4423	30.4423	0.233314	0.00766415	2	29.4176	29.7642	0.703431	0.0239119	3	28.8592	29.0359	0.61381	0.0212691	3	30.1127	30.1127	0.330631	0.0109798	2	28.7738	28.026	1.47472	0.0512521	3	27.7796	27.7816	0.350538	0.0126185	3	28.1867	28.0019	0.348005	0.0123464	3	NaN	29.8286
P52565	Rho GDP-dissociation inhibitor 1	ARHGDIA	27.6532	27.6532	0.00710495	0.00025693	2	NaN	NaN	NaN	NaN	0	NaN	NaN	NaN	NaN	0	28.1721	28.1721	NaN	NaN	1	NaN	NaN	NaN	NaN	0	NaN	NaN	NaN	NaN	0	28.6633	28.6633	NaN	NaN	1	NaN	NaN	NaN	NaN	0	NaN	NaN	NaN	NaN	0	NaN	NaN
P52594	Arf-GAP domain and FG repeat-containing protein 1	AGFG1	NaN	NaN	NaN	NaN	0	NaN	NaN	NaN	NaN	0	27.2982	27.2982	NaN	NaN	1	NaN	NaN	NaN	NaN	0	NaN	NaN	NaN	NaN	0	NaN	NaN	NaN	NaN	0	NaN	NaN	NaN	NaN	0	NaN	NaN	NaN	NaN	0	NaN	NaN	NaN	NaN	0	NaN	NaN
P52597	Heterogeneous nuclear ribonucleoprotein F;Heterogeneous nuclear ribonucleoprotein F, N-terminally processed	HNRNPF	27.1124	27.1124	NaN	NaN	1	28.5798	28.5798	0.294805	0.0103152	2	28.0052	28.0052	0.774702	0.0276628	2	NaN	NaN	NaN	NaN	0	28.8893	28.8893	NaN	NaN	1	27.3129	27.3129	NaN	NaN	1	28.6148	28.6148	0.592454	0.0207045	2	27.9272	27.9272	NaN	NaN	1	27.9995	27.9995	0.375687	0.0134176	2	NaN	28.7883
P52701	DNA mismatch repair protein Msh6	MSH6	26.0138	26.0056	0.355946	0.013683	3	26.3662	26.3662	NaN	NaN	1	26.4376	26.3558	0.296289	0.0112071	3	26.2493	26.2493	NaN	NaN	1	26.8875	27.0466	0.623464	0.0231879	3	27.0084	27.0084	NaN	NaN	1	NaN	NaN	NaN	NaN	0	NaN	NaN	NaN	NaN	0	NaN	NaN	NaN	NaN	0	26.0056	26.3662
P52732	Kinesin-like protein KIF11	KIF11	NaN	NaN	NaN	NaN	0	NaN	NaN	NaN	NaN	0	NaN	NaN	NaN	NaN	0	NaN	NaN	NaN	NaN	0	24.9223	24.9223	0.0766668	0.00307624	2	24.9268	24.9268	NaN	NaN	1	24.6422	24.6422	NaN	NaN	1	NaN	NaN	NaN	NaN	0	26.1106	26.1106	NaN	NaN	1	NaN	NaN
P52758	Ribonuclease UK114	HRSP12	NaN	NaN	NaN	NaN	0	26.6725	26.6725	NaN	NaN	1	NaN	NaN	NaN	NaN	0	NaN	NaN	NaN	NaN	0	NaN	NaN	NaN	NaN	0	27.0664	27.0664	NaN	NaN	1	NaN	NaN	NaN	NaN	0	NaN	NaN	NaN	NaN	0	NaN	NaN	NaN	NaN	0	NaN	26.6725
P52788	Spermine synthase	SMS	NaN	NaN	NaN	NaN	0	NaN	NaN	NaN	NaN	0	NaN	NaN	NaN	NaN	0	NaN	NaN	NaN	NaN	0	NaN	NaN	NaN	NaN	0	24.8719	24.8719	NaN	NaN	1	NaN	NaN	NaN	NaN	0	NaN	NaN	NaN	NaN	0	NaN	NaN	NaN	NaN	0	NaN	NaN
P52789	Hexokinase-2	HK2	25.8926	25.8926	NaN	NaN	1	NaN	NaN	NaN	NaN	0	25.567	25.567	NaN	NaN	1	NaN	NaN	NaN	NaN	0	NaN	NaN	NaN	NaN	0	26.9798	26.9798	NaN	NaN	1	NaN	NaN	NaN	NaN	0	NaN	NaN	NaN	NaN	0	25.9513	25.9513	NaN	NaN	1	25.8926	NaN
P52815	39S ribosomal protein L12, mitochondrial	MRPL12	28.7875	28.7875	0.390953	0.0135806	2	28.5691	28.5691	NaN	NaN	1	NaN	NaN	NaN	NaN	0	28.6964	28.6964	0.125977	0.00438998	2	28.7372	28.7372	0.759559	0.0264312	2	29.1138	29.1138	0.413022	0.0141865	2	29.7806	29.7806	NaN	NaN	1	28.9	29.0544	0.80306	0.0277876	3	29.0633	29.0633	0.848856	0.0292072	2	29.064	NaN
P52888	Thimet oligopeptidase	THOP1	26.8401	26.8401	NaN	NaN	1	NaN	NaN	NaN	NaN	0	26.3411	26.3411	0.486273	0.0184606	2	26.9051	26.9051	NaN	NaN	1	25.9819	25.9819	NaN	NaN	1	27.5959	27.5959	NaN	NaN	1	NaN	NaN	NaN	NaN	0	25.905	25.905	NaN	NaN	1	25.972	25.972	NaN	NaN	1	NaN	NaN
P52895	Aldo-keto reductase family 1 member C2	AKR1C2	NaN	NaN	NaN	NaN	0	NaN	NaN	NaN	NaN	0	NaN	NaN	NaN	NaN	0	NaN	NaN	NaN	NaN	0	26.8904	26.8904	NaN	NaN	1	NaN	NaN	NaN	NaN	0	NaN	NaN	NaN	NaN	0	NaN	NaN	NaN	NaN	0	NaN	NaN	NaN	NaN	0	NaN	NaN
P52907	F-actin-capping protein subunit alpha-1	CAPZA1	27.203	26.9666	0.589087	0.0216552	3	26.7991	26.6118	0.518101	0.0193328	3	26.8837	26.6618	0.650094	0.0241817	3	27.2031	27.4169	0.523151	0.0192313	3	27.7464	27.4774	0.743307	0.0267893	3	26.8604	26.8604	0.0709888	0.00264288	2	27.6533	27.6533	0.165816	0.00599623	2	27.6321	27.4403	0.789017	0.0285543	3	27.9062	27.9062	NaN	NaN	1	26.7689	27.3848
P52948	Nuclear pore complex protein Nup98-Nup96;Nuclear pore complex protein Nup98;Nuclear pore complex protein Nup96	NUP98	26.5713	26.5713	NaN	NaN	1	NaN	NaN	NaN	NaN	0	26.5302	26.604	0.268134	0.0101067	3	26.8143	26.8143	NaN	NaN	1	26.0241	26.0241	0.704749	0.0270806	2	NaN	NaN	NaN	NaN	0	27.6014	27.6014	0.24444	0.00885606	2	27.1191	27.1191	0.42843	0.0157981	2	27.2438	27.2438	NaN	NaN	1	NaN	NaN
P53004	Biliverdin reductase A	BLVRA	26.5709	26.5709	NaN	NaN	1	26.2832	26.2832	0.665807	0.025332	2	26.8833	26.9913	0.218963	0.00814494	3	26.9526	26.9526	NaN	NaN	1	27.061	27.1718	0.539219	0.0199261	3	27.576	27.576	NaN	NaN	1	NaN	NaN	NaN	NaN	0	25.6374	25.6374	0.330712	0.0128996	2	26.9693	27.2942	0.913185	0.0338602	3	NaN	25.8125
P53007	Tricarboxylate transport protein, mitochondrial	SLC25A1	27.1826	27.1826	0.584859	0.021516	2	27.4596	27.651	0.338815	0.0123387	3	27.0459	27.0271	0.0662546	0.00244971	3	26.9047	26.8135	0.665667	0.0247417	3	27.0031	26.7891	0.554978	0.0205524	3	27.1256	27.1251	0.0125175	0.000461463	3	26.8545	26.8545	0.477605	0.0177849	2	26.9716	27.1177	0.360527	0.0133669	3	27.2055	27.299	0.59381	0.0218269	3	27.5961	27.651
P53041	Serine/threonine-protein phosphatase 5	PPP5C	27.1196	27.1196	0.453929	0.0167381	2	27.4021	27.4021	0.233812	0.00853261	2	26.9658	26.9566	0.31041	0.0115113	3	27.6379	27.6379	NaN	NaN	1	27.987	27.987	NaN	NaN	1	NaN	NaN	NaN	NaN	0	NaN	NaN	NaN	NaN	0	NaN	NaN	NaN	NaN	0	27.8774	27.8774	NaN	NaN	1	27.4406	27.2368
P53365	Arfaptin-2	ARFIP2	NaN	NaN	NaN	NaN	0	NaN	NaN	NaN	NaN	0	NaN	NaN	NaN	NaN	0	26.0055	26.0055	NaN	NaN	1	NaN	NaN	NaN	NaN	0	NaN	NaN	NaN	NaN	0	NaN	NaN	NaN	NaN	0	NaN	NaN	NaN	NaN	0	NaN	NaN	NaN	NaN	0	NaN	NaN
P53367	Arfaptin-1	ARFIP1	27.7774	27.7774	NaN	NaN	1	27.1308	27.1308	NaN	NaN	1	27.1339	27.1339	NaN	NaN	1	NaN	NaN	NaN	NaN	0	25.9872	25.9872	NaN	NaN	1	26.2717	26.2717	1.92135	0.0731336	2	NaN	NaN	NaN	NaN	0	25.7615	25.7615	NaN	NaN	1	23.5278	23.5278	NaN	NaN	1	27.7774	27.1308
P53384	Cytosolic Fe-S cluster assembly factor NUBP1	NUBP1	28.7695	28.7695	NaN	NaN	1	27.711	27.711	NaN	NaN	1	29.1246	29.1246	0.27319	0.00938004	2	NaN	NaN	NaN	NaN	0	NaN	NaN	NaN	NaN	0	NaN	NaN	NaN	NaN	0	NaN	NaN	NaN	NaN	0	NaN	NaN	NaN	NaN	0	NaN	NaN	NaN	NaN	0	28.7695	27.711
P53396	ATP-citrate synthase	ACLY	28.8331	29.1397	0.821263	0.0284833	3	29.4272	29.3131	0.584184	0.0198518	3	29.138	29.2624	0.650741	0.0223331	3	28.8997	28.6358	0.821954	0.0284416	3	29.469	29.5912	0.563495	0.0191217	3	28.7379	28.6392	0.993311	0.0345645	3	28.222	28.3752	0.300527	0.0106487	3	28.3357	28.4062	0.196217	0.00692473	3	28.1087	28.1542	0.334175	0.0118887	3	29.1397	29.3131
P53582	Methionine aminopeptidase 1	METAP1	26.901	26.901	NaN	NaN	1	NaN	NaN	NaN	NaN	0	26.2847	26.2847	NaN	NaN	1	NaN	NaN	NaN	NaN	0	26.1541	26.1541	NaN	NaN	1	26.8923	26.8923	NaN	NaN	1	27.1831	27.1831	NaN	NaN	1	27.4574	27.4574	NaN	NaN	1	NaN	NaN	NaN	NaN	0	NaN	NaN
P53597	Succinyl-CoA ligase [ADP/GDP-forming] subunit alpha, mitochondrial	SUCLG1	26.5733	26.5733	NaN	NaN	1	27.5129	27.5129	0.896965	0.0326016	2	27.53	27.4262	0.319355	0.0116003	3	27.8016	27.7345	0.657647	0.023655	3	27.172	27.3175	0.880505	0.0324048	3	26.1956	26.1956	0.00594641	0.000227	2	26.9047	26.9047	0.497299	0.0184837	2	27.5186	27.5774	0.273113	0.00992467	3	27.524	27.524	0.857937	0.0311706	2	NaN	26.8787
P53611	Geranylgeranyl transferase type-2 subunit beta	RABGGTB	NaN	NaN	NaN	NaN	0	NaN	NaN	NaN	NaN	0	25.743	25.743	NaN	NaN	1	NaN	NaN	NaN	NaN	0	NaN	NaN	NaN	NaN	0	26.9487	26.9487	NaN	NaN	1	NaN	NaN	NaN	NaN	0	NaN	NaN	NaN	NaN	0	NaN	NaN	NaN	NaN	0	NaN	NaN
P53618	Coatomer subunit beta	COPB1	26.7879	26.7879	NaN	NaN	1	NaN	NaN	NaN	NaN	0	26.9266	26.9748	0.24538	0.00911293	3	26.4867	26.4867	NaN	NaN	1	27.4632	27.4632	NaN	NaN	1	27.4475	27.4475	NaN	NaN	1	27.0264	27.0264	NaN	NaN	1	26.4367	26.4367	NaN	NaN	1	25.9389	25.9389	NaN	NaN	1	NaN	NaN
P53621	Coatomer subunit alpha;Xenin;Proxenin	COPA	28.2981	28.2981	0.389707	0.0137715	2	28.3973	28.3411	0.151583	0.00533795	3	28.3304	28.3106	0.0904807	0.00319377	3	27.1296	27.3882	0.531005	0.0195729	3	27.8298	27.8298	0.461424	0.0165802	2	27.6404	27.5203	0.442081	0.015994	3	NaN	NaN	NaN	NaN	0	NaN	NaN	NaN	NaN	0	28.5587	28.5587	NaN	NaN	1	28.0225	28.569
P53675	Clathrin heavy chain 2	CLTCL1	29.1521	29.1364	0.317795	0.0109013	3	28.2708	28.19	0.402479	0.0142366	3	29.5583	29.5583	0.32686	0.0110582	2	28.1046	28.1046	0.405261	0.0144198	2	29.0882	28.7821	0.624496	0.0214691	3	29.1593	29.0675	0.292481	0.0100304	3	29.4819	29.4044	0.228335	0.00774491	3	28.9346	28.7513	0.534661	0.0184783	3	29.0595	29.0595	0.10653	0.00366592	2	29.4775	28.19
P53701	Cytochrome c-type heme lyase	HCCS	23.6486	23.6486	NaN	NaN	1	NaN	NaN	NaN	NaN	0	NaN	NaN	NaN	NaN	0	NaN	NaN	NaN	NaN	0	23.6383	23.6383	0.74295	0.03143	2	NaN	NaN	NaN	NaN	0	NaN	NaN	NaN	NaN	0	NaN	NaN	NaN	NaN	0	NaN	NaN	NaN	NaN	0	NaN	NaN
P53990	IST1 homolog	IST1	NaN	NaN	NaN	NaN	0	26.9029	26.9029	NaN	NaN	1	NaN	NaN	NaN	NaN	0	NaN	NaN	NaN	NaN	0	NaN	NaN	NaN	NaN	0	NaN	NaN	NaN	NaN	0	NaN	NaN	NaN	NaN	0	NaN	NaN	NaN	NaN	0	NaN	NaN	NaN	NaN	0	NaN	26.9029
P53992	Protein transport protein Sec24C	SEC24C	25.4001	25.4001	NaN	NaN	1	NaN	NaN	NaN	NaN	0	25.2815	25.4056	0.721917	0.0285552	3	NaN	NaN	NaN	NaN	0	26.4042	26.4042	NaN	NaN	1	NaN	NaN	NaN	NaN	0	NaN	NaN	NaN	NaN	0	26.3377	26.3377	NaN	NaN	1	NaN	NaN	NaN	NaN	0	NaN	NaN
P53999	Activated RNA polymerase II transcriptional coactivator p15	SUB1	30.2036	30.2036	NaN	NaN	1	30.1185	30.1185	0.0602005	0.00199879	2	30.5047	30.5047	NaN	NaN	1	29.2392	29.2392	NaN	NaN	1	30.1825	30.1825	NaN	NaN	1	29.7251	29.7251	0.0109433	0.000368152	2	30.1065	30.1065	0.161762	0.00537298	2	30.3743	30.3743	NaN	NaN	1	29.8814	29.8814	0.21577	0.0072209	2	30.2036	NaN
P54136	Arginine--tRNA ligase, cytoplasmic	RARS	28.6781	28.6781	1.02299	0.0356713	2	28.5516	28.3247	0.58607	0.0205267	3	27.583	27.583	1.09428	0.0396725	2	28.4607	28.4672	0.0392743	0.00137995	3	28.3187	27.9813	0.602474	0.0212748	3	27.9437	28.1071	0.439375	0.0157235	3	28.3965	28.3714	0.545161	0.0191982	3	28.6831	28.6831	NaN	NaN	1	28.1478	28.0992	0.461169	0.0163839	3	27.9547	29.2172
P54577	Tyrosine--tRNA ligase, cytoplasmic;Tyrosine--tRNA ligase, cytoplasmic, N-terminally processed	YARS	29.5516	29.604	0.434925	0.0147175	3	29.9569	29.9862	0.185015	0.00617605	3	29.7726	29.7753	0.119771	0.00402284	3	29.4486	29.5095	0.140032	0.00475514	3	29.4046	29.5346	0.334389	0.011372	3	29.4265	29.4209	0.177598	0.00603533	3	29.3873	29.3421	0.112974	0.00384432	3	29.3534	29.3499	0.160952	0.00548326	3	29.5321	29.5609	0.11669	0.00395131	3	29.604	29.9862
P54578	Ubiquitin carboxyl-terminal hydrolase 14	USP14	26.8767	26.8767	1.08201	0.0402585	2	NaN	NaN	NaN	NaN	0	27.7317	27.7317	NaN	NaN	1	27.0921	27.0921	0.238194	0.00879201	2	27.2745	27.2594	0.494233	0.0181207	3	28.0281	27.6335	0.768284	0.0274112	3	NaN	NaN	NaN	NaN	0	28.1083	28.1083	NaN	NaN	1	NaN	NaN	NaN	NaN	0	26.1116	NaN
P54619	5-AMP-activated protein kinase subunit gamma-1	PRKAG1	NaN	NaN	NaN	NaN	0	NaN	NaN	NaN	NaN	0	NaN	NaN	NaN	NaN	0	NaN	NaN	NaN	NaN	0	27.4477	27.4477	NaN	NaN	1	NaN	NaN	NaN	NaN	0	25.9947	25.9947	NaN	NaN	1	27.0204	27.0204	NaN	NaN	1	26.7514	26.7514	NaN	NaN	1	NaN	NaN
P54652	Heat shock-related 70 kDa protein 2	HSPA2	32.7281	32.7478	0.397683	0.0121511	3	32.5359	32.6279	0.219207	0.0067374	3	32.481	32.5162	0.0631225	0.00194337	3	32.5226	32.4637	0.132606	0.00407734	3	32.8378	32.8141	0.172671	0.0052583	3	32.9772	33.0551	0.363106	0.0110108	3	32.5991	32.5534	0.203009	0.00622743	3	32.1177	31.9832	0.534859	0.0166531	3	32.6206	32.5315	0.200609	0.00614975	3	32.3209	32.6279
P54707	Potassium-transporting ATPase alpha chain 2	ATP12A	27.7861	27.7861	0.801663	0.0288512	2	28.3753	28.3753	0.595026	0.0209698	2	27.4042	27.4042	0.374054	0.0136495	2	NaN	NaN	NaN	NaN	0	28.0655	28.0655	0.0528731	0.00188392	2	26.7285	26.7285	0.77026	0.028818	2	NaN	NaN	NaN	NaN	0	27.208	27.208	NaN	NaN	1	NaN	NaN	NaN	NaN	0	28.353	NaN
P54709	Sodium/potassium-transporting ATPase subunit beta-3	ATP1B3	27.2867	27.2867	NaN	NaN	1	27.0476	27.0476	NaN	NaN	1	27.3981	27.3981	0.0555934	0.00202909	2	27.381	27.381	NaN	NaN	1	NaN	NaN	NaN	NaN	0	NaN	NaN	NaN	NaN	0	26.651	26.651	NaN	NaN	1	NaN	NaN	NaN	NaN	0	NaN	NaN	NaN	NaN	0	NaN	27.0476
P54725	UV excision repair protein RAD23 homolog A	RAD23A	NaN	NaN	NaN	NaN	0	NaN	NaN	NaN	NaN	0	26.0783	26.0783	NaN	NaN	1	NaN	NaN	NaN	NaN	0	26.6918	26.6918	NaN	NaN	1	26.438	26.438	NaN	NaN	1	27.5972	27.5972	NaN	NaN	1	NaN	NaN	NaN	NaN	0	NaN	NaN	NaN	NaN	0	NaN	NaN
P54727	UV excision repair protein RAD23 homolog B	RAD23B	27.8361	27.8361	NaN	NaN	1	28.8026	28.8026	NaN	NaN	1	28.6746	28.6746	NaN	NaN	1	28.1687	28.1687	0.335939	0.011926	2	28.7528	28.7528	NaN	NaN	1	30.1477	30.1477	1.61059	0.0534234	2	NaN	NaN	NaN	NaN	0	30.9649	30.9649	NaN	NaN	1	NaN	NaN	NaN	NaN	0	NaN	NaN
P54819	Adenylate kinase 2, mitochondrial;Adenylate kinase 2, mitochondrial, N-terminally processed	AK2	28.3448	28.4155	0.155613	0.00549	3	27.9526	27.5978	0.616213	0.022045	3	27.8159	28.0917	0.729095	0.0262114	3	28.1526	28.1526	0.258759	0.00919128	2	28.1235	28.267	1.05092	0.0373681	3	28.6522	28.6522	0.700524	0.0244492	2	28.6113	28.6113	0.693668	0.0242445	2	28.6491	28.6491	0.748968	0.0261428	2	28.5275	28.5275	NaN	NaN	1	28.1663	27.5978
P54886	Delta-1-pyrroline-5-carboxylate synthase;Glutamate 5-kinase;Gamma-glutamyl phosphate reductase	ALDH18A1	28.1947	28.1525	0.290598	0.0103068	3	28.7737	28.6139	0.302902	0.0105271	3	28.3857	28.3984	0.177644	0.00625823	3	28.0102	28.0102	0.123695	0.00441605	2	27.998	28.0277	0.466454	0.0166603	3	28.0699	28.0699	0.37578	0.0133873	2	27.404	27.7434	0.600155	0.0219003	3	28.0241	27.8478	0.415761	0.0148358	3	27.4561	27.4981	0.260162	0.00947556	3	28.504	28.6139
P54920	Alpha-soluble NSF attachment protein	NAPA	NaN	NaN	NaN	NaN	0	26.4671	26.4671	NaN	NaN	1	26.645	26.645	NaN	NaN	1	26.7972	26.7972	NaN	NaN	1	26.4747	26.4747	NaN	NaN	1	NaN	NaN	NaN	NaN	0	NaN	NaN	NaN	NaN	0	NaN	NaN	NaN	NaN	0	NaN	NaN	NaN	NaN	0	NaN	NaN
P55010	Eukaryotic translation initiation factor 5	EIF5	26.5189	26.5189	0.198948	0.00750211	2	26.5208	26.7749	0.488912	0.018435	3	26.2843	26.2843	0.996078	0.0378964	2	25.6769	25.6769	0.667146	0.0259823	2	27.9125	27.9125	0.836818	0.02998	2	25.9341	25.9922	0.292634	0.0112838	3	26.2971	26.2971	NaN	NaN	1	26.1605	26.217	0.731885	0.0279767	3	26.1732	25.6314	0.950329	0.0363092	3	NaN	25.9572
P55036	26S proteasome non-ATPase regulatory subunit 4	PSMD4	27.1929	26.7627	0.776548	0.028557	3	27.3241	27.2319	0.346657	0.0126868	3	27.4164	27.2536	0.398427	0.0145324	3	27.3359	27.2682	0.962458	0.0352086	3	28.1803	28.4204	0.919531	0.0326303	3	27.3727	27.3727	1.05059	0.0383811	2	27.6592	27.6592	0.722727	0.0261298	2	27.4926	27.5119	0.748182	0.027214	3	27.5001	27.5964	0.263769	0.00959156	3	28.0893	27.2319
P55056	Apolipoprotein C-IV	APOC4	29.1865	29.1865	0.39991	0.0137019	2	28.734	28.734	NaN	NaN	1	28.7918	28.7918	NaN	NaN	1	29.2638	29.2638	0.6622	0.0226287	2	NaN	NaN	NaN	NaN	0	NaN	NaN	NaN	NaN	0	28.5616	28.5616	1.25964	0.0441025	2	NaN	NaN	NaN	NaN	0	NaN	NaN	NaN	NaN	0	NaN	28.734
P55060	Exportin-2	CSE1L	28.8921	29.3285	0.774241	0.0267977	3	28.5891	28.9374	0.758839	0.0265429	3	28.9644	28.9575	0.247319	0.00853872	3	28.8376	28.7672	0.280723	0.00973461	3	29.172	29.2579	0.384835	0.0131919	3	28.7002	28.7871	0.562339	0.0195935	3	28.8918	28.8558	0.231105	0.00799901	3	29.0557	28.9346	0.311259	0.0107125	3	28.8659	28.9964	0.285598	0.00989395	3	29.3285	28.9374
P55061	Bax inhibitor 1	TMBIM6	25.3728	25.3728	NaN	NaN	1	25.1789	25.1789	NaN	NaN	1	25.487	25.7688	0.628843	0.0246731	3	NaN	NaN	NaN	NaN	0	NaN	NaN	NaN	NaN	0	NaN	NaN	NaN	NaN	0	NaN	NaN	NaN	NaN	0	NaN	NaN	NaN	NaN	0	NaN	NaN	NaN	NaN	0	NaN	25.1789
P55072	Transitional endoplasmic reticulum ATPase	VCP	28.9526	28.9508	0.537355	0.0185598	3	28.7056	28.5589	0.474555	0.0165318	3	28.2284	28.3146	0.243469	0.00862494	3	28.9865	29.0179	0.154805	0.0053406	3	27.9602	27.4967	0.880991	0.0315088	3	28.5637	28.5164	0.637435	0.0223163	3	27.9858	27.9978	0.247149	0.00883125	3	28.6958	28.6155	0.341028	0.0118842	3	28.8972	29.0136	0.225415	0.0078006	3	28.9508	28.3217
P55083	Microfibril-associated glycoprotein 4	MFAP4	30.1835	30.1835	NaN	NaN	1	NaN	NaN	NaN	NaN	0	NaN	NaN	NaN	NaN	0	29.3859	29.3859	NaN	NaN	1	NaN	NaN	NaN	NaN	0	NaN	NaN	NaN	NaN	0	29.6509	29.3125	0.981256	0.0330936	3	29.0935	29.0935	0.91742	0.0315336	2	29.7915	29.7915	NaN	NaN	1	30.1835	NaN
P55084	Trifunctional enzyme subunit beta, mitochondrial;3-ketoacyl-CoA thiolase	HADHB	27.6212	27.6212	0.637413	0.023077	2	27.1159	27.1159	NaN	NaN	1	27.0063	27.1625	0.443908	0.0164372	3	27.8234	27.8234	NaN	NaN	1	28.0395	28.0395	0.53235	0.0189857	2	27.1013	27.1013	0.0791929	0.00292211	2	27.0377	27.0377	NaN	NaN	1	27.2713	27.2713	NaN	NaN	1	NaN	NaN	NaN	NaN	0	28.0719	NaN
P55145	Mesencephalic astrocyte-derived neurotrophic factor	MANF	29.4821	29.4821	NaN	NaN	1	NaN	NaN	NaN	NaN	0	NaN	NaN	NaN	NaN	0	NaN	NaN	NaN	NaN	0	NaN	NaN	NaN	NaN	0	NaN	NaN	NaN	NaN	0	NaN	NaN	NaN	NaN	0	28.5247	28.5247	NaN	NaN	1	NaN	NaN	NaN	NaN	0	NaN	NaN
P55157	Microsomal triglyceride transfer protein large subunit	MTTP	NaN	NaN	NaN	NaN	0	27.6464	27.6464	NaN	NaN	1	27.7983	27.7983	NaN	NaN	1	NaN	NaN	NaN	NaN	0	NaN	NaN	NaN	NaN	0	NaN	NaN	NaN	NaN	0	NaN	NaN	NaN	NaN	0	NaN	NaN	NaN	NaN	0	NaN	NaN	NaN	NaN	0	NaN	27.6464
P55196	Afadin	MLLT4	NaN	NaN	NaN	NaN	0	30.7218	30.7218	NaN	NaN	1	30.6657	30.6657	0.0368316	0.00120107	2	32.1493	32.1493	NaN	NaN	1	31.3329	31.3329	NaN	NaN	1	30.8968	30.8968	0.810721	0.0262396	2	31.1947	31.1947	0.405531	0.013	2	30.7061	30.7061	NaN	NaN	1	NaN	NaN	NaN	NaN	0	NaN	NaN
P55209	Nucleosome assembly protein 1-like 1	NAP1L1	30.1027	30.171	0.215788	0.0071684	3	28.9531	29.4155	0.834018	0.0288058	3	29.571	29.44	0.413563	0.0139854	3	30.4363	30.4906	0.424412	0.0139443	3	30.2777	30.2777	0.420766	0.0138969	2	30.0256	30.1099	0.216152	0.00719892	3	29.9787	29.9913	0.318148	0.0106125	3	30.3972	30.3521	0.326948	0.0107559	3	29.8775	29.8775	NaN	NaN	1	30.171	29.4155
P55263	Adenosine kinase	ADK	26.7609	26.7609	0.201862	0.00754317	2	27.7649	27.7649	NaN	NaN	1	26.8608	27.1035	0.754005	0.0280708	3	NaN	NaN	NaN	NaN	0	27.7844	27.7844	NaN	NaN	1	27.1114	27.1114	0.217915	0.00803777	2	27.0846	27.0846	NaN	NaN	1	26.6091	26.6091	0.117126	0.00440174	2	NaN	NaN	NaN	NaN	0	26.9037	27.7649
P55265	Double-stranded RNA-specific adenosine deaminase	ADAR	25.9143	25.9143	NaN	NaN	1	26.2464	26.2464	0.086395	0.00329169	2	26.6525	26.6525	NaN	NaN	1	25.3625	25.3625	NaN	NaN	1	26.934	26.8576	0.338375	0.0125631	3	26.5904	26.5904	0.0224734	0.00084517	2	26.9567	26.9567	NaN	NaN	1	26.9866	26.9866	NaN	NaN	1	26.5895	26.5895	NaN	NaN	1	NaN	NaN
P55327	Tumor protein D52	TPD52	28.5358	28.5358	NaN	NaN	1	28.5677	28.5199	0.222026	0.00777193	3	28.8836	28.8836	NaN	NaN	1	28.9453	28.9453	NaN	NaN	1	28.169	28.169	0.701609	0.0249071	2	28.3553	28.3045	0.37024	0.0130572	3	27.9636	27.9636	0.36832	0.0131714	2	27.8439	27.9115	0.211145	0.00758317	3	28.3576	28.4348	0.15014	0.00529451	3	NaN	28.8097
P55769	NHP2-like protein 1;NHP2-like protein 1, N-terminally processed	NHP2L1	27.1974	27.4955	0.557476	0.0204975	3	27.0868	27.0868	0.214803	0.00793017	2	27.3442	27.2165	0.420325	0.0153717	3	27.2461	27.2461	0.337855	0.0124001	2	27.6514	27.6569	0.800908	0.0289645	3	29.2787	29.2787	0.440279	0.0150375	2	27.7542	27.7542	NaN	NaN	1	28.1273	28.1273	0.848016	0.0301492	2	28.0849	28.0849	NaN	NaN	1	27.5424	26.9349
P55786	Puromycin-sensitive aminopeptidase	NPEPPS	28.6425	28.6354	0.125299	0.00437459	3	28.3147	28.3175	0.114459	0.00404237	3	28.509	28.5675	0.146858	0.00515128	3	27.8295	28.0162	0.444725	0.0159803	3	28.2967	28.352	0.252496	0.00892317	3	27.9974	27.822	0.811632	0.0289896	3	27.6804	27.9347	0.612951	0.0221439	3	28.2091	28.1166	0.319772	0.0113358	3	28.0166	28.1093	0.350105	0.0124963	3	28.6354	28.1989
P55795	Heterogeneous nuclear ribonucleoprotein H2	HNRNPH2	28.4207	28.4207	1.14327	0.0402268	2	29.0185	29.0219	0.308229	0.0106218	3	29.1647	29.0368	0.435364	0.0149278	3	NaN	NaN	NaN	NaN	0	28.3635	28.4432	0.30594	0.0107864	3	28.7512	28.7512	0.883537	0.0307304	2	28.8429	28.8989	0.174196	0.00603947	3	28.8093	28.8093	0.664694	0.0230722	2	28.6258	28.8743	0.828731	0.0289505	3	NaN	28.7085
P55809	Succinyl-CoA:3-ketoacid coenzyme A transferase 1, mitochondrial	OXCT1	26.3193	26.3193	0.0515297	0.00195787	2	27.7753	27.7753	NaN	NaN	1	27.4366	27.4366	0.263209	0.00959336	2	26.2901	26.2901	0.200566	0.00762896	2	26.8575	26.8575	0.528001	0.0196593	2	26.5348	26.5348	0.162611	0.00612823	2	26.5117	26.5117	NaN	NaN	1	27.0212	27.0212	NaN	NaN	1	24.9912	24.9912	NaN	NaN	1	26.2829	NaN
P55884	Eukaryotic translation initiation factor 3 subunit B	EIF3B	28.1777	28.2196	0.595987	0.021151	3	27.7602	28.0467	0.539576	0.0194371	3	27.96	28.2641	0.529793	0.0189483	3	28.4	28.4374	0.247076	0.00869985	3	28.5395	28.7073	0.355265	0.0124482	3	28.0881	28.4966	0.814161	0.028986	3	27.3919	27.4923	0.368976	0.0134702	3	28.3983	28.2178	0.369756	0.0130204	3	28.4437	28.2948	0.424225	0.0149145	3	27.5619	28.0467
P56134	ATP synthase subunit f, mitochondrial	ATP5J2	20.6244	20.6244	NaN	NaN	1	NaN	NaN	NaN	NaN	0	NaN	NaN	NaN	NaN	0	NaN	NaN	NaN	NaN	0	NaN	NaN	NaN	NaN	0	NaN	NaN	NaN	NaN	0	NaN	NaN	NaN	NaN	0	NaN	NaN	NaN	NaN	0	NaN	NaN	NaN	NaN	0	NaN	NaN
P56192	Methionine--tRNA ligase, cytoplasmic	MARS	30.1771	30.1771	NaN	NaN	1	30.5124	30.5124	0.107988	0.00353915	2	NaN	NaN	NaN	NaN	0	30.8646	31.0222	1.01219	0.0327945	3	NaN	NaN	NaN	NaN	0	NaN	NaN	NaN	NaN	0	31.1438	31.1438	0.371047	0.011914	2	29.9604	29.9604	0.967986	0.0323088	2	29.994	29.994	NaN	NaN	1	30.1771	30.5887
P56199	Integrin alpha-1	ITGA1	NaN	NaN	NaN	NaN	0	NaN	NaN	NaN	NaN	0	27.9465	27.9465	NaN	NaN	1	NaN	NaN	NaN	NaN	0	NaN	NaN	NaN	NaN	0	NaN	NaN	NaN	NaN	0	NaN	NaN	NaN	NaN	0	NaN	NaN	NaN	NaN	0	NaN	NaN	NaN	NaN	0	NaN	NaN
P56211	cAMP-regulated phosphoprotein 19	ARPP19	27.9868	27.7574	0.488054	0.0174388	3	28.244	27.9297	0.725786	0.025697	3	27.9168	27.8998	0.439471	0.0157422	3	27.8966	27.7115	0.374581	0.0134275	3	27.6343	27.6206	0.217918	0.00788579	3	28.0077	28.0237	0.601456	0.0214747	3	28.316	28.0813	0.451631	0.0159497	3	28.0944	27.9727	0.586546	0.0208777	3	28.3441	28.3894	0.324611	0.0114525	3	27.7574	27.7283
P56545	C-terminal-binding protein 2	CTBP2	24.6964	24.6964	NaN	NaN	1	NaN	NaN	NaN	NaN	0	24.4672	24.4672	NaN	NaN	1	NaN	NaN	NaN	NaN	0	NaN	NaN	NaN	NaN	0	25.4296	25.4296	1.40008	0.0550572	2	NaN	NaN	NaN	NaN	0	NaN	NaN	NaN	NaN	0	NaN	NaN	NaN	NaN	0	NaN	NaN
P56556	NADH dehydrogenase [ubiquinone] 1 alpha subcomplex subunit 6	NDUFA6	26.9656	26.9384	0.239277	0.00887339	3	26.7882	26.7882	0.642172	0.0239722	2	26.8653	26.8653	0.108845	0.00405153	2	26.699	26.699	0.00252881	9.47155e-05	2	26.3299	26.3299	0.266763	0.0101316	2	26.7918	26.7918	0.0913771	0.00341064	2	NaN	NaN	NaN	NaN	0	NaN	NaN	NaN	NaN	0	NaN	NaN	NaN	NaN	0	26.9384	NaN
P57088	Transmembrane protein 33	TMEM33	NaN	NaN	NaN	NaN	0	27.0173	27.0173	NaN	NaN	1	26.605	26.605	NaN	NaN	1	NaN	NaN	NaN	NaN	0	30.106	30.106	NaN	NaN	1	26.6505	26.6505	NaN	NaN	1	NaN	NaN	NaN	NaN	0	NaN	NaN	NaN	NaN	0	NaN	NaN	NaN	NaN	0	NaN	NaN
P57105	Synaptojanin-2-binding protein	SYNJ2BP	25.2838	25.2838	NaN	NaN	1	NaN	NaN	NaN	NaN	0	NaN	NaN	NaN	NaN	0	NaN	NaN	NaN	NaN	0	NaN	NaN	NaN	NaN	0	NaN	NaN	NaN	NaN	0	NaN	NaN	NaN	NaN	0	NaN	NaN	NaN	NaN	0	NaN	NaN	NaN	NaN	0	NaN	NaN
P57678	Gem-associated protein 4	GEMIN4	NaN	NaN	NaN	NaN	0	NaN	NaN	NaN	NaN	0	NaN	NaN	NaN	NaN	0	NaN	NaN	NaN	NaN	0	NaN	NaN	NaN	NaN	0	NaN	NaN	NaN	NaN	0	24.0932	24.0932	NaN	NaN	1	NaN	NaN	NaN	NaN	0	NaN	NaN	NaN	NaN	0	NaN	NaN
P57740	Nuclear pore complex protein Nup107	NUP107	25.3536	25.3536	NaN	NaN	1	25.8627	25.8627	NaN	NaN	1	NaN	NaN	NaN	NaN	0	NaN	NaN	NaN	NaN	0	NaN	NaN	NaN	NaN	0	NaN	NaN	NaN	NaN	0	NaN	NaN	NaN	NaN	0	NaN	NaN	NaN	NaN	0	NaN	NaN	NaN	NaN	0	25.3536	25.8627
P58107	Epiplakin	EPPK1	26.83	26.83	NaN	NaN	1	27.1961	27.1961	NaN	NaN	1	NaN	NaN	NaN	NaN	0	NaN	NaN	NaN	NaN	0	NaN	NaN	NaN	NaN	0	26.4217	26.4217	NaN	NaN	1	NaN	NaN	NaN	NaN	0	NaN	NaN	NaN	NaN	0	NaN	NaN	NaN	NaN	0	NaN	NaN
P58546	Myotrophin	MTPN	27.5265	27.4749	0.270016	0.00980932	3	28.541	28.6047	0.31767	0.0111303	3	28.1571	28.1144	0.262927	0.00933787	3	28.1953	28.1776	0.227772	0.00807837	3	28.1042	28.1468	0.303684	0.0108056	3	28.5596	28.5596	0.155076	0.00542991	2	27.9583	27.9583	0.51562	0.0184425	2	27.807	27.807	0.390966	0.01406	2	27.7617	27.7617	0.383527	0.013815	2	27.8185	28.822
P59910	DnaJ homolog subfamily B member 13	DNAJB13	31.898	31.898	1.69194	0.0530421	2	NaN	NaN	NaN	NaN	0	32.0885	32.0885	NaN	NaN	1	31.8652	31.8652	2.25613	0.0708024	2	31.5496	31.5496	NaN	NaN	1	29.7482	29.7482	1.0623	0.0357099	2	32.1728	32.1728	NaN	NaN	1	31.7281	31.7281	NaN	NaN	1	NaN	NaN	NaN	NaN	0	33.0944	NaN
P59998	Actin-related protein 2/3 complex subunit 4	ARPC4	27.6418	27.6418	0.0731534	0.00264648	2	27.3552	27.3552	0.106249	0.00388405	2	27.3918	27.3918	0.133148	0.00486086	2	NaN	NaN	NaN	NaN	0	27.4188	27.4188	NaN	NaN	1	NaN	NaN	NaN	NaN	0	NaN	NaN	NaN	NaN	0	NaN	NaN	NaN	NaN	0	28.0261	28.0261	NaN	NaN	1	27.6935	27.4304
P60174	Triosephosphate isomerase	TPI1	31.7703	31.7445	0.0596774	0.0018784	3	32.0324	32.1352	0.351551	0.0109749	3	31.9424	31.9648	0.121075	0.00379042	3	31.7486	31.655	0.303314	0.00955363	3	31.7131	31.7065	0.17461	0.00550595	3	31.802	31.8367	0.0635285	0.00199762	3	32.1857	32.1607	0.200423	0.00622708	3	31.9537	31.8574	0.326986	0.0102331	3	32.0215	31.9709	0.16068	0.00501788	3	31.8385	32.1352
P60228	Eukaryotic translation initiation factor 3 subunit E	EIF3E	28.0108	28.2066	0.5953	0.0212525	3	27.8166	27.7688	0.116498	0.00418807	3	27.6159	27.5257	0.196023	0.00709821	3	28.1145	28.0264	0.273598	0.00973153	3	27.9831	28.1811	0.520659	0.0186062	3	27.5575	27.5575	0.465236	0.0168824	2	27.0658	27.1718	0.350415	0.0129468	3	27.6343	27.5538	0.291701	0.0105557	3	26.4351	26.4351	2.12099	0.0802339	2	28.4835	27.7317
P60468	Protein transport protein Sec61 subunit beta	SEC61B	26.8886	26.8886	NaN	NaN	1	26.4768	26.4768	0.464388	0.0175395	2	26.7452	26.7452	NaN	NaN	1	26.3379	26.3379	0.313822	0.0119152	2	24.7733	24.7733	NaN	NaN	1	NaN	NaN	NaN	NaN	0	NaN	NaN	NaN	NaN	0	NaN	NaN	NaN	NaN	0	NaN	NaN	NaN	NaN	0	26.8886	26.1484
P60520	Gamma-aminobutyric acid receptor-associated protein-like 2	GABARAPL2	25.0524	25.0524	0.126102	0.00503352	2	NaN	NaN	NaN	NaN	0	NaN	NaN	NaN	NaN	0	NaN	NaN	NaN	NaN	0	25.7707	25.7707	NaN	NaN	1	26.6659	26.6659	NaN	NaN	1	NaN	NaN	NaN	NaN	0	NaN	NaN	NaN	NaN	0	NaN	NaN	NaN	NaN	0	25.1416	NaN
P60660	Myosin light polypeptide 6	MYL6	30.661	30.6185	0.211217	0.00688878	3	30.7687	30.7883	0.245783	0.00798809	3	30.7055	30.6174	0.354913	0.0115586	3	30.829	30.9594	0.599489	0.0194457	3	30.5143	30.4516	0.112963	0.00370196	3	30.3369	30.3951	0.124458	0.00410251	3	30.6943	30.6888	0.0681027	0.00221875	3	30.7453	30.6954	0.192284	0.00625408	3	31.0549	31.1468	0.339883	0.0109446	3	30.6185	30.7883
P60842	Eukaryotic initiation factor 4A-I	EIF4A1	31.3747	31.3685	0.194002	0.00618338	3	30.9485	31.4437	1.13657	0.0367246	3	31.4135	31.3933	0.125913	0.00400823	3	31.4651	31.4912	0.0738689	0.00234765	3	31.4633	31.5233	0.136442	0.00433656	3	31.138	31.0085	0.255656	0.0082104	3	31.0619	31.2987	0.412534	0.013281	3	31.2689	31.1625	0.351059	0.0112271	3	31.2317	31.1927	0.0904517	0.00289615	3	31.5717	31.4437
P60866	40S ribosomal protein S20	RPS20	NaN	NaN	NaN	NaN	0	NaN	NaN	NaN	NaN	0	NaN	NaN	NaN	NaN	0	26.4797	26.4797	NaN	NaN	1	26.9913	26.9913	0.926354	0.0343204	2	NaN	NaN	NaN	NaN	0	NaN	NaN	NaN	NaN	0	26.5486	26.5486	0.978894	0.0368717	2	27.5752	27.5752	NaN	NaN	1	NaN	NaN
P60891	Ribose-phosphate pyrophosphokinase 1	PRPS1	29.4115	29.7647	0.953972	0.0324353	3	29.8204	29.82	0.520022	0.0174385	3	29.7907	29.8304	0.177171	0.00594718	3	29.412	29.412	0.0563756	0.00191676	2	29.0975	29.2069	0.63788	0.0219221	3	28.5671	28.6348	0.671128	0.023493	3	29.5828	29.4913	0.269684	0.00911625	3	29.5295	29.5958	0.198309	0.00671564	3	29.4991	29.586	0.214788	0.00728118	3	30.1386	29.3005
P60900	Proteasome subunit alpha type-6	PSMA6	29.6484	29.3232	0.638875	0.0215484	3	30.5366	30.8876	0.700609	0.0229433	3	30.0746	30.1621	0.226071	0.007517	3	29.4074	29.4951	0.225794	0.00767815	3	29.9195	29.9195	0.0205933	0.000688289	2	29.429	29.5571	0.327278	0.0111209	3	29.1742	29.4667	0.775155	0.0265699	3	30.008	29.9581	0.638661	0.0212831	3	29.7235	29.814	0.406941	0.0136909	3	29.3232	29.7299
P60903	Protein S100-A10	S100A10	27.7905	27.7905	NaN	NaN	1	NaN	NaN	NaN	NaN	0	NaN	NaN	NaN	NaN	0	27.5248	27.5248	0.262047	0.00952039	2	27.7677	27.7677	NaN	NaN	1	NaN	NaN	NaN	NaN	0	NaN	NaN	NaN	NaN	0	NaN	NaN	NaN	NaN	0	26.9779	26.9779	NaN	NaN	1	NaN	NaN
P60981	Destrin	DSTN	28.7215	28.6953	0.225242	0.00784226	3	28.7184	28.6362	0.642321	0.0223662	3	28.8646	28.7989	0.169237	0.00586315	3	28.6163	28.9719	0.832274	0.0290839	3	29.1151	29.1151	0.019807	0.0006803	2	28.6472	28.499	0.331706	0.011579	3	28.458	28.2251	0.41463	0.0145699	3	28.4258	28.4258	0.370983	0.0130509	2	28.5721	28.6883	0.440518	0.0154178	3	28.6953	28.1212
P60983	Glia maturation factor beta	GMFB	NaN	NaN	NaN	NaN	0	27.1638	27.1638	0.29943	0.0110231	2	27.5879	27.5879	0.350779	0.012715	2	26.6615	26.6615	NaN	NaN	1	26.7694	26.7694	0.734487	0.0274375	2	26.3427	26.3427	NaN	NaN	1	26.847	26.847	0.446502	0.0166314	2	27.345	27.345	NaN	NaN	1	27.4402	27.4402	NaN	NaN	1	NaN	27.3755
P61006	Ras-related protein Rab-8A	RAB8A	30.0249	29.7726	0.832728	0.0277346	3	30.2801	30.1121	0.793722	0.0262127	3	30.1177	29.9047	0.609101	0.020224	3	30.6678	30.5705	0.206992	0.00674949	3	30.5392	30.6828	0.710744	0.0232732	3	30.7541	30.502	0.552357	0.0179605	3	30.5794	30.4735	0.254478	0.00832186	3	30.3321	30.3256	0.062109	0.00204763	3	30.6504	30.6504	0.195155	0.00636714	2	29.3475	31.1444
P61009	Signal peptidase complex subunit 3	SPCS3	27.7508	27.3731	0.719333	0.0259212	3	27.0589	27.1839	0.251322	0.00928796	3	27.206	27.2113	0.224219	0.00824152	3	27.4998	27.4998	0.0103202	0.000375284	2	27.2964	27.2964	0.228095	0.00835623	2	27.4228	27.4228	0.0400833	0.00146168	2	27.0059	27.0059	0.438013	0.0162192	2	NaN	NaN	NaN	NaN	0	NaN	NaN	NaN	NaN	0	27.2989	27.1839
P61011	Signal recognition particle 54 kDa protein	SRP54	27.0474	27.0474	NaN	NaN	1	NaN	NaN	NaN	NaN	0	NaN	NaN	NaN	NaN	0	NaN	NaN	NaN	NaN	0	NaN	NaN	NaN	NaN	0	24.1504	24.1504	NaN	NaN	1	NaN	NaN	NaN	NaN	0	NaN	NaN	NaN	NaN	0	NaN	NaN	NaN	NaN	0	27.0474	NaN
P61019	Ras-related protein Rab-2A	RAB2A	28.6595	28.6595	0.135697	0.00473479	2	28.6337	28.6393	0.240435	0.00839693	3	28.3079	28.3079	0.0425771	0.00150407	2	27.6842	27.6842	0.753965	0.0272345	2	28.3879	28.3629	0.459042	0.0161703	3	27.8717	28.4414	1.06665	0.0382699	3	28.6238	28.6238	0.0220971	0.000771983	2	27.8578	27.8281	0.164522	0.00590577	3	28.6374	28.4704	0.445241	0.0155475	3	28.5635	28.8712
P61020	Ras-related protein Rab-5B	RAB5B	28.3981	28.2538	0.469844	0.0165449	3	28.0952	28.1602	0.318826	0.011348	3	28.3553	28.3258	0.245926	0.00867302	3	28.0503	28.0503	0.291442	0.01039	2	27.992	27.6863	0.531775	0.0189974	3	28.4302	28.4302	1.07284	0.0377358	2	28.5252	28.5252	0.444537	0.015584	2	28.5067	28.4316	0.481111	0.0168771	3	28.8574	28.8787	0.176906	0.00613035	3	28.0173	28.1602
P61026	Ras-related protein Rab-10	RAB10	29.9526	29.4784	0.902446	0.0301291	3	30.2191	29.9448	0.751834	0.0248794	3	30.1717	29.9435	0.589384	0.0195343	3	30.6953	30.6719	0.231848	0.00755321	3	31.0038	31.0038	0.285749	0.00921657	2	30.8656	30.5396	0.71624	0.0232051	3	30.5234	30.3937	0.341533	0.0111892	3	30.4227	30.3992	0.154373	0.00507425	3	30.647	30.647	0.469876	0.0153319	2	29.3862	31.0696
P61077	Ubiquitin-conjugating enzyme E2 D3;Ubiquitin-conjugating enzyme E2 D2	UBE2D3	29.7742	29.7742	NaN	NaN	1	NaN	NaN	NaN	NaN	0	28.8203	28.8203	0.895894	0.0310855	2	NaN	NaN	NaN	NaN	0	NaN	NaN	NaN	NaN	0	NaN	NaN	NaN	NaN	0	NaN	NaN	NaN	NaN	0	NaN	NaN	NaN	NaN	0	NaN	NaN	NaN	NaN	0	29.7742	NaN
P61081	NEDD8-conjugating enzyme Ubc12	UBE2M	NaN	NaN	NaN	NaN	0	NaN	NaN	NaN	NaN	0	NaN	NaN	NaN	NaN	0	NaN	NaN	NaN	NaN	0	28.411	28.411	NaN	NaN	1	29.0373	29.0373	NaN	NaN	1	NaN	NaN	NaN	NaN	0	NaN	NaN	NaN	NaN	0	28.1089	28.1089	NaN	NaN	1	NaN	NaN
P61086	Ubiquitin-conjugating enzyme E2 K	UBE2K	NaN	NaN	NaN	NaN	0	27.6344	27.6344	NaN	NaN	1	NaN	NaN	NaN	NaN	0	NaN	NaN	NaN	NaN	0	26.7217	26.7217	NaN	NaN	1	27.0377	27.0377	NaN	NaN	1	NaN	NaN	NaN	NaN	0	NaN	NaN	NaN	NaN	0	NaN	NaN	NaN	NaN	0	NaN	27.6344
P61088	Ubiquitin-conjugating enzyme E2 N;Putative ubiquitin-conjugating enzyme E2 N-like	UBE2N	27.4718	27.457	0.362268	0.0131869	3	27.3625	27.3625	0.481871	0.0176106	2	27.641	27.4539	0.490006	0.0177275	3	26.9965	26.9965	1.09109	0.0404162	2	28.1185	28.1185	0.829789	0.0295105	2	27.9077	27.9077	NaN	NaN	1	27.4535	27.5232	0.263787	0.00960852	3	27.6406	27.5412	0.623552	0.0225592	3	27.8245	27.8245	0.342436	0.012307	2	27.8412	27.7033
P61106	Ras-related protein Rab-14	RAB14	NaN	NaN	NaN	NaN	0	NaN	NaN	NaN	NaN	0	NaN	NaN	NaN	NaN	0	NaN	NaN	NaN	NaN	0	NaN	NaN	NaN	NaN	0	26.7087	26.7087	NaN	NaN	1	28.2661	28.2661	NaN	NaN	1	27.9434	27.9434	NaN	NaN	1	27.8221	28.1887	0.863196	0.0310256	3	NaN	NaN
P61158	Actin-related protein 3	ACTR3	26.4301	26.4301	0.792061	0.0299681	2	27.5502	27.5502	1.4406	0.05229	2	27.5375	27.5375	0.766788	0.0278452	2	27.9017	26.8533	1.95861	0.0701967	3	27.826	27.826	1.07703	0.0387058	2	28.7828	28.7828	NaN	NaN	1	30.2055	30.2055	0.487874	0.0161518	2	31.1356	31.1356	0.583562	0.0187426	2	27.9525	27.9525	NaN	NaN	1	26.9902	26.5315
P61160	Actin-related protein 2	ACTR2	27.5286	27.5286	0.153556	0.00557807	2	27.7442	27.9311	0.381122	0.013737	3	27.2345	27.2345	NaN	NaN	1	27.7718	27.8635	0.284432	0.0102418	3	26.7315	26.7315	0.243687	0.0091161	2	26.6484	26.6484	NaN	NaN	1	27.3966	27.3966	NaN	NaN	1	28.1564	28.1564	0.352835	0.0125312	2	27.7227	27.7227	NaN	NaN	1	27.6371	27.9311
P61163	Alpha-centractin	ACTR1A	28.3361	28.3361	0.888071	0.0313406	2	29.2875	29.2875	0.900456	0.0307454	2	29.2989	29.2989	0.0799091	0.00272737	2	30.1369	30.1369	NaN	NaN	1	28.4269	28.4269	0.0412419	0.0014508	2	28.199	28.199	NaN	NaN	1	28.1685	28.1685	1.22046	0.0433272	2	NaN	NaN	NaN	NaN	0	29.8777	29.8777	NaN	NaN	1	NaN	28.6508
P61201	COP9 signalosome complex subunit 2	COPS2	26.6687	26.6687	0.161758	0.00606545	2	27.7425	27.7425	NaN	NaN	1	27.2783	27.2783	NaN	NaN	1	NaN	NaN	NaN	NaN	0	27.1337	27.1337	0.217335	0.00800978	2	27.2804	27.2804	NaN	NaN	1	28.0083	28.0083	0.442028	0.0157821	2	26.6858	26.6858	NaN	NaN	1	27.5502	27.5502	NaN	NaN	1	26.5543	NaN
P61221	ATP-binding cassette sub-family E member 1	ABCE1	NaN	NaN	NaN	NaN	0	27.8447	27.8447	NaN	NaN	1	26.972	26.972	NaN	NaN	1	NaN	NaN	NaN	NaN	0	26.7789	26.7789	NaN	NaN	1	28.1167	28.1167	NaN	NaN	1	26.4572	26.4572	NaN	NaN	1	27.1234	27.1234	NaN	NaN	1	NaN	NaN	NaN	NaN	0	NaN	27.8447
P61224	Ras-related protein Rap-1b;Ras-related protein Rap-1b-like protein	RAP1B	28.9454	28.9951	0.196912	0.00680287	3	28.4332	28.4332	0.0368977	0.0012977	2	28.9652	28.8884	0.197395	0.0068149	3	29.0219	28.7421	0.53994	0.0186046	3	29.0264	29.0264	NaN	NaN	1	28.2362	28.2484	0.186197	0.00659426	3	28.34	28.2379	0.896518	0.0316343	3	29.0292	29.0292	NaN	NaN	1	29.6101	29.6101	NaN	NaN	1	28.9951	28.4593
P61247	40S ribosomal protein S3a	RPS3A	30.2161	30.1126	0.310622	0.01028	3	30.1753	30.3567	0.445388	0.01476	3	30.4842	30.4383	0.176521	0.00579057	3	30.1908	30.1323	0.11496	0.00380778	3	30.1638	30.403	0.462749	0.0153412	3	29.6421	29.3017	0.646365	0.0218057	3	30.4881	30.5374	0.18021	0.00591082	3	30.4136	30.2842	0.328934	0.0108154	3	29.8793	30.0334	0.441799	0.0147861	3	30.5653	30.3567
P61254	60S ribosomal protein L26	RPL26	27.4113	27.9719	1.81912	0.066364	3	28.5947	28.5947	0.0669022	0.00233967	2	28.2862	28.3605	0.142189	0.0050268	3	28.2947	28.2947	0.250255	0.00884458	2	28.402	28.6369	0.566184	0.0199347	3	27.9086	28.0101	0.2167	0.00776464	3	28.4585	28.4585	0.144247	0.0050687	2	28.3981	28.2087	0.548557	0.0193166	3	28.0554	28.3916	0.633334	0.0225744	3	28.8841	NaN
P61289	Proteasome activator complex subunit 3	PSME3	28.3881	28.3881	0.120594	0.00424805	2	27.7804	27.9108	0.243281	0.00875732	3	NaN	NaN	NaN	NaN	0	28.1675	28.0933	0.160359	0.00569306	3	27.7317	27.7317	0.569407	0.0205327	2	28.6575	28.2704	0.954977	0.0333238	3	28.3464	28.3464	NaN	NaN	1	NaN	NaN	NaN	NaN	0	29.6459	29.6459	0.144304	0.00486759	2	28.3028	27.4997
P61313	60S ribosomal protein L15	RPL15	29.5265	29.5345	0.354771	0.0120153	3	28.8425	29.9341	2.06276	0.0715179	3	29.9591	30.1661	0.497738	0.0166139	3	28.8142	29.9382	2.13905	0.0742362	3	30.0637	29.7339	0.58473	0.0194497	3	29.9138	29.7569	0.557344	0.0186317	3	29.7617	29.7974	0.237274	0.00797246	3	30.003	30.0437	0.137975	0.00459871	3	29.772	29.6509	0.211727	0.00711161	3	29.8772	30.1301
P61326	Protein mago nashi homolog	MAGOH	27.2818	27.2818	0.395764	0.0145065	2	NaN	NaN	NaN	NaN	0	27.6417	27.7969	0.279822	0.0101232	3	27.5917	27.5917	NaN	NaN	1	27.4507	27.0247	1.02174	0.037221	3	27.2519	27.2519	0.068986	0.00253142	2	NaN	NaN	NaN	NaN	0	NaN	NaN	NaN	NaN	0	NaN	NaN	NaN	NaN	0	27.5617	NaN
P61353	60S ribosomal protein L27	RPL27	28.9651	28.9651	0.432164	0.0149201	2	29.2138	29.2138	0.907057	0.0310489	2	28.6367	28.7365	0.332878	0.0116242	3	28.0817	28.0817	NaN	NaN	1	28.9688	29.0023	0.44328	0.015302	3	28.6634	28.6421	0.297416	0.0103761	3	28.811	28.6949	0.284373	0.00987028	3	28.2761	28.2761	0.532426	0.0188296	2	28.3061	28.3061	NaN	NaN	1	28.6596	NaN
P61457	Pterin-4-alpha-carbinolamine dehydratase	PCBD1	27.7268	27.7268	0.278508	0.0100447	2	27.9813	27.9813	0.146823	0.0052472	2	27.7913	27.8724	0.302368	0.0108799	3	26.9068	26.9068	NaN	NaN	1	27.5493	27.5493	0.0480906	0.00174562	2	NaN	NaN	NaN	NaN	0	27.8835	27.8835	0.383457	0.0137521	2	27.7891	27.7891	0.136167	0.00490003	2	27.7923	27.7923	NaN	NaN	1	NaN	28.0851
P61513	60S ribosomal protein L37a	RPL37A	28.8953	28.8953	NaN	NaN	1	27.7225	27.7225	0.0336244	0.00121289	2	28.5198	28.5198	0.245442	0.00860602	2	NaN	NaN	NaN	NaN	0	28.3054	28.3054	0.340228	0.0120199	2	26.6931	26.6931	NaN	NaN	1	NaN	NaN	NaN	NaN	0	28.1533	28.1533	NaN	NaN	1	NaN	NaN	NaN	NaN	0	NaN	NaN
P61604	10 kDa heat shock protein, mitochondrial	HSPE1	31.4469	31.4892	0.269912	0.00858308	3	31.6266	31.6778	0.321143	0.0101542	3	31.3687	31.3796	0.109613	0.00349435	3	31.8874	31.8517	0.128959	0.00404421	3	31.5552	31.6045	0.63056	0.0199828	3	32.0364	32.0275	0.0559032	0.00174499	3	32.07	32.0684	0.0367216	0.00114504	3	31.7932	31.889	0.234363	0.00737149	3	32.2501	32.2952	0.230702	0.00715353	3	31.6932	31.6778
P61619	Protein transport protein Sec61 subunit alpha isoform 1	SEC61A1	NaN	NaN	NaN	NaN	0	NaN	NaN	NaN	NaN	0	27.3234	27.3234	NaN	NaN	1	27.8883	27.8883	NaN	NaN	1	NaN	NaN	NaN	NaN	0	NaN	NaN	NaN	NaN	0	26.6476	26.6476	NaN	NaN	1	NaN	NaN	NaN	NaN	0	NaN	NaN	NaN	NaN	0	NaN	NaN
[truncated: 1,419 more rows]
[truncated: 42 more columns]

## Sheet: 02_SILAC
Protein ID	Protein names	Gene name	lg2invNsil. PHLF.P1_PRE	lg2invNsil. PHLF.P1_POD1	lg2invNsil. PHLF.P1_POD5	lg2invNsil. PHLF.P2_PRE	lg2invNsil. PHLF.P2_POD1	lg2invNsil. PHLF.P2_POD5	lg2invNsil. PHLF.P3_PRE	lg2invNsil. PHLF.P3_POD1	lg2invNsil. PHLF.P3_POD5	lg2invNsil. noPHLF.P1_PRE	lg2invNsil. noPHLF.P1_POD1	lg2invNsil. noPHLF.P1_POD5	lg2invNsil. noPHLF.P2_PRE	lg2invNsil. noPHLF.P2_POD1	lg2invNsil. noPHLF.P2_POD5	lg2invNsil. noPHLF.P3_PRE	lg2invNsil. noPHLF.P3_POD1	lg2invNsil. noPHLF.P3_POD5	lg2invNsil. ALPPS.P1_PRE	lg2invNsil. ALPPS.P1_POD1	lg2invNsil. ALPPS.P1_POD5	lg2invNsil. ALPPS.P2_PRE	lg2invNsil. ALPPS.P2_POD1	lg2invNsil. ALPPS.P2_POD5	lg2invNsil. ALPPS.P3_PRE	lg2invNsil. ALPPS.P3_POD1	lg2invNsil. ALPPS.P3_POD5	Vesiclepedia
[truncated: 2,570 more rows]

[truncated: 16 more sheets: 03_LFQ-H (SILAC) variance, 04_Venn LFQ-L_SILAC, 05_Enrichment, 06_GOCC overall, 07a1_Blood, 07a2_IgGs, 07b_Vesicle, 07c_Mitochondria, 07d_ER_EM_Golgi, 07e_lysosome, 07f_Nucleus, nucleoid, 07g_Splicosome, 07h_Pasma membrane, 07i_cytosoplasma, 07j_Other-594, 08_Vesiclepedia]
